# Supplementary material
Source: PubMed Central journal article supplement (PMC10906480)
Supplement: NIHMS985382-supplement-Supplementary_Information.pdf [file NIHMS985382-supplement-Supplementary_Information.pdf]

# SUPPLEMENTARY INFORMATION

doi:10.1038/nature21060

**Supplementary Figure S1** | Bipartite network of antibody binding from serum of protected and non-protected volunteers in the groups that received doses of  $3.2 \times 10^3$  PfSPZ-CVac (A),  $1.28 \times 10^4$  PfSPZ-CVac (B), and  $5.12 \times 10^4$  PfSPZ-CVac (C). Purple circles represent protected volunteers, grey circles represent non-protected volunteers, and white squares represent proteins. Lines represent positive responses from individuals for connected proteins. The tables below each network show the proteins labeled numerically in the networks for which at least 5/9 volunteers responded. Blue cells represent proteins recognized in two dose groups, and green cells represent proteins recognized in three dose groups.

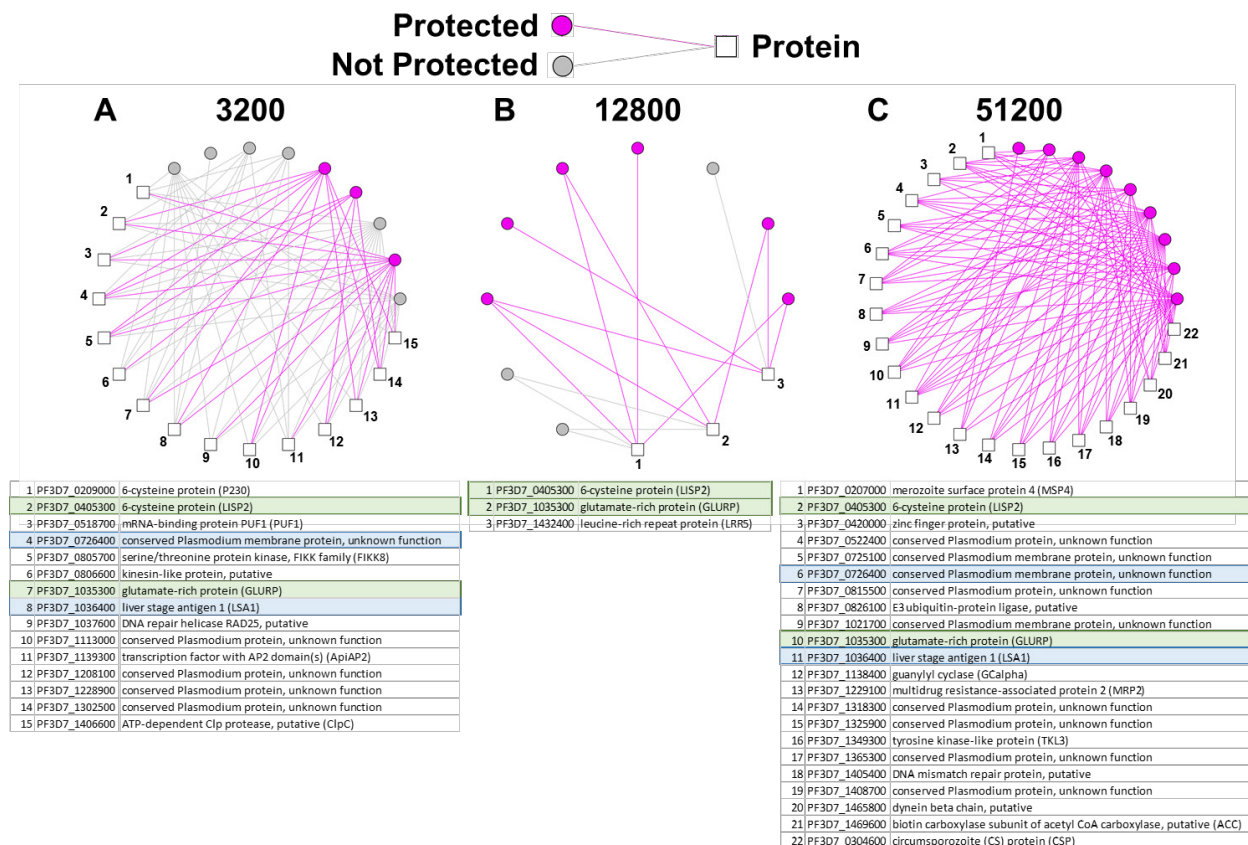

## Supplementary Table S1 | Type, grade and number of adverse events during the trial.

## Clinical adverse events during immunization. Number of adverse events

| Group                             | Placebo |   | 3.2x10 <sup>3</sup><br>PfSPZ |   | Placebo |   | 1.28x10 <sup>4</sup><br>PfSPZ |   | Placebo |   |   | 5.12x10 <sup>4</sup><br>PfSPZ |   |
|-----------------------------------|---------|---|------------------------------|---|---------|---|-------------------------------|---|---------|---|---|-------------------------------|---|
|                                   | 1       | 2 | 1                            | 2 | 1       | 2 | 1                             | 3 | 1       | 2 | 3 | 1                             | 2 |
| Abdominal cramps                  | 0       | 0 | 0                            | 0 | 0       | 0 | 0                             | 0 | 0       | 0 | 0 | 2                             | 0 |
| Accident automobile               | 0       | 0 | 0                            | 0 | 0       | 0 | 0                             | 1 | 0       | 0 | 0 | 0                             | 0 |
| Blurry vision                     | 1       | 0 | 0                            | 0 | 0       | 0 | 0                             | 0 | 1       | 0 | 0 | 1                             | 0 |
| Bronchitis                        | 0       | 0 | 0                            | 0 | 0       | 0 | 0                             | 0 | 0       | 1 | 0 | 0                             | 0 |
| Contusion of foot                 | 0       | 0 | 0                            | 0 | 0       | 0 | 0                             | 0 | 0       | 0 | 0 | 0                             | 1 |
| Diarrhea                          | 0       | 0 | 1                            | 0 | 0       | 0 | 1                             | 0 | 0       | 0 | 0 | 2                             | 0 |
| Dizziness                         | 0       | 0 | 1                            | 0 | 0       | 0 | 1                             | 0 | 2       | 0 | 0 | 1                             | 0 |
| Drowsiness                        | 0       | 0 | 0                            | 0 | 0       | 0 | 0                             | 0 | 0       | 0 | 0 | 1                             | 0 |
| Dysmenorrhoea                     | 1       | 0 | 0                            | 0 | 0       | 0 | 0                             | 0 | 0       | 0 | 0 | 0                             | 0 |
| EBV infection                     | 0       | 0 | 0                            | 0 | 0       | 1 | 0                             | 0 | 0       | 0 | 0 | 0                             | 0 |
| Epigastric pain                   | 0       | 0 | 1                            | 0 | 0       | 0 | 0                             | 0 | 0       | 0 | 0 | 0                             | 0 |
| Epistaxis                         | 0       | 0 | 1                            | 0 | 0       | 0 | 0                             | 0 | 0       | 0 | 0 | 0                             | 0 |
| Erythema                          | 0       | 0 | 0                            | 0 | 0       | 0 | 1                             | 0 | 0       | 0 | 0 | 0                             | 0 |
| Euphoria                          | 1       | 0 | 0                            | 0 | 0       | 0 | 0                             | 0 | 0       | 0 | 0 | 0                             | 0 |
| Fatigue                           | 0       | 0 | 0                            | 0 | 0       | 0 | 1                             | 0 | 0       | 0 | 0 | 0                             | 1 |
| Feeling hot                       | 0       | 0 | 0                            | 0 | 1       | 0 | 0                             | 0 | 0       | 0 | 0 | 0                             | 0 |
| Fever                             | 0       | 0 | 0                            | 0 | 0       | 0 | 0                             | 0 | 0       | 1 | 0 | 0                             | 2 |
| Flatulence                        | 0       | 0 | 0                            | 0 | 0       | 0 | 0                             | 0 | 0       | 0 | 0 | 2                             | 0 |
| Flu                               | 1       | 0 | 0                            | 0 | 1       | 0 | 0                             | 0 | 0       | 0 | 0 | 0                             | 1 |
| Head injury                       | 0       | 0 | 0                            | 0 | 0       | 0 | 0                             | 0 | 0       | 0 | 1 | 0                             | 0 |
| Headache                          | 1       | 0 | 4                            | 1 | 0       | 0 | 3                             | 0 | 1       | 0 | 0 | 5                             | 0 |
| Hypertension diastolic            | 0       | 0 | 0                            | 0 | 0       | 0 | 1                             | 0 | 0       | 0 | 0 | 0                             | 1 |
| Laryngitis viral                  | 0       | 0 | 0                            | 0 | 1       | 0 | 0                             | 0 | 0       | 0 | 0 | 0                             | 0 |
| Myalgia                           | 0       | 0 | 0                            | 0 | 0       | 0 | 0                             | 0 | 0       | 0 | 0 | 1                             | 0 |
| Nausea                            | 0       | 0 | 0                            | 0 | 0       | 0 | 0                             | 0 | 3       | 0 | 0 | 3                             | 0 |
| Pain ear                          | 0       | 0 | 1                            | 0 | 0       | 0 | 0                             | 0 | 0       | 1 | 0 | 0                             | 0 |
| Rash                              | 0       | 0 | 0                            | 1 | 0       | 0 | 0                             | 0 | 0       | 0 | 0 | 0                             | 0 |
| Rhinitis                          | 0       | 0 | 0                            | 0 | 0       | 0 | 0                             | 0 | 0       | 0 | 0 | 0                             | 1 |
| Sensation of pressure in the eyes | 1       | 0 | 0                            | 0 | 0       | 0 | 0                             | 0 | 1       | 0 | 0 | 0                             | 0 |
| Sinusitis                         | 0       | 0 | 0                            | 0 | 0       | 0 | 0                             | 0 | 0       | 1 | 0 | 0                             | 1 |
| Splinter                          | 0       | 0 | 0                            | 0 | 0       | 0 | 0                             | 0 | 0       | 1 | 0 | 0                             | 0 |
| Sprained ankle                    | 0       | 1 | 0                            | 0 | 0       | 0 | 0                             | 0 | 0       | 0 | 0 | 0                             | 0 |
| Stomach cramps                    | 0       | 0 | 0                            | 0 | 0       | 0 | 1                             | 0 | 0       | 0 | 0 | 0                             | 0 |
| Sweating                          | 0       | 0 | 0                            | 0 | 0       | 0 | 1                             | 0 | 0       | 0 | 0 | 0                             | 0 |
| Systolic Hypertension             | 0       | 0 | 0                            | 0 | 0       | 0 | 1                             | 0 | 0       | 0 | 0 | 1                             | 0 |
| Tachycardia                       | 0       | 0 | 0                            | 0 | 0       | 0 | 0                             | 0 | 0       | 0 | 0 | 0                             | 1 |
| Taste metallic                    | 0       | 0 | 0                            | 0 | 0       | 0 | 0                             | 0 | 0       | 0 | 0 | 1                             | 0 |
| Urinary tract infection           | 0       | 0 | 0                            | 0 | 0       | 1 | 0                             | 0 | 0       | 0 | 0 | 0                             | 2 |
| Vertigo                           | 0       | 0 | 0                            | 0 | 0       | 0 | 0                             | 0 | 1       | 0 | 0 | 1                             | 0 |

**Laboratory adverse events during immunization.** Number of adverse events

| Group                       | Placebo |   |   | 3.2x10 <sup>3</sup> PfSPZ |   |   | Placebo |   |   | 1.28x10 <sup>4</sup> PfSPZ |   |   | Placebo |   |   | 5.12x10 <sup>4</sup> PfSPZ |   |    |
|-----------------------------|---------|---|---|---------------------------|---|---|---------|---|---|----------------------------|---|---|---------|---|---|----------------------------|---|----|
|                             | 1       | 2 | 3 | 1                         | 2 | 3 | 1       | 2 | 3 | 1                          | 2 | 3 | 1       | 2 | 3 | 1                          | 2 | 3  |
| ALT increased               | 0       | 0 | 0 | 0                         | 0 | 0 | 2       | 1 | 0 | 4                          | 1 | 0 | 1       | 0 | 1 | 0                          | 0 | 0  |
| Anemia                      | 2       | 0 | 0 | 0                         | 0 | 0 | 2       | 0 | 0 | 4                          | 0 | 0 | 1       | 0 | 1 | 1                          | 0 | 0  |
| Basophilia                  | 1       | 0 | 0 | 0                         | 0 | 0 | 3       | 1 | 0 | 4                          | 0 | 0 | 1       | 0 | 5 | 0                          | 0 | 0  |
| Bilirubinemia               | 1       | 0 | 0 | 1                         | 0 | 0 | 1       | 0 | 0 | 3                          | 0 | 0 | 0       | 0 | 0 | 0                          | 0 | 0  |
| Blood basophils decreased   | 0       | 0 | 0 | 1                         | 0 | 0 | 1       | 0 | 0 | 0                          | 0 | 0 | 1       | 0 | 0 | 0                          | 0 | 0  |
| Blood creatinine decreased  | 0       | 0 | 0 | 1                         | 0 | 0 | 0       | 0 | 0 | 0                          | 0 | 0 | 0       | 0 | 0 | 0                          | 0 | 0  |
| Blood eosinophils decreased | 0       | 0 | 0 | 0                         | 0 | 0 | 0       | 0 | 0 | 2                          | 0 | 0 | 0       | 0 | 1 | 0                          | 0 | 0  |
| Blood eosinophils increased | 1       | 0 | 0 | 2                         | 1 | 0 | 2       | 0 | 0 | 5                          | 0 | 0 | 0       | 0 | 1 | 0                          | 0 | 0  |
| Blood neutrophils increased | 1       | 0 | 0 | 0                         | 0 | 0 | 1       | 0 | 0 | 0                          | 0 | 0 | 0       | 0 | 0 | 0                          | 0 | 0  |
| Creatinine blood increased  | 0       | 0 | 0 | 1                         | 0 | 0 | 1       | 0 | 0 | 0                          | 0 | 0 | 1       | 0 | 3 | 0                          | 0 | 0  |
| Erythrocytes decreased      | 0       | 0 | 0 | 0                         | 0 | 0 | 0       | 0 | 0 | 1                          | 0 | 0 | 3       | 0 | 2 | 0                          | 0 | 0  |
| GOT increased               | 5       | 0 | 0 | 0                         | 0 | 0 | 3       | 0 | 0 | 4                          | 0 | 0 | 0       | 0 | 0 | 0                          | 0 | 0  |
| Hematocrit decreased        | 2       | 0 | 0 | 5                         | 0 | 0 | 1       | 0 | 0 | 5                          | 0 | 0 | 1       | 0 | 2 | 1                          | 0 | 0  |
| Hyperglycemia               | 0       | 0 | 0 | 0                         | 1 | 0 | 0       | 1 | 0 | 2                          | 0 | 0 | 2       | 0 | 0 | 0                          | 0 | 0  |
| Hyperkalemia                | 2       | 0 | 0 | 0                         | 0 | 0 | 0       | 0 | 0 | 0                          | 0 | 0 | 0       | 0 | 0 | 0                          | 0 | 0  |
| Hyponatremia                | 0       | 1 | 0 | 1                         | 0 | 0 | 0       | 0 | 0 | 2                          | 0 | 0 | 1       | 0 | 1 | 0                          | 0 | 0  |
| Hypoglycaemia               | 1       | 0 | 0 | 2                         | 0 | 0 | 0       | 0 | 0 | 1                          | 2 | 2 | 0       | 1 | 1 | 0                          | 0 | 0  |
| Hypokalemia                 | 0       | 0 | 0 | 0                         | 1 | 0 | 0       | 0 | 1 | 0                          | 0 | 0 | 0       | 0 | 0 | 0                          | 0 | 0  |
| LDH                         | 3       | 0 | 0 | 1                         | 0 | 0 | 3       | 0 | 0 | 5                          | 0 | 0 | 0       | 0 | 7 | 0                          | 0 | 0  |
| Leucocytosis NOS            | 1       | 0 | 0 | 0                         | 0 | 0 | 1       | 0 | 0 | 0                          | 0 | 0 | 0       | 0 | 2 | 0                          | 0 | 0  |
| Leucopenia                  | 3       | 0 | 0 | 1                         | 0 | 0 | 0       | 0 | 0 | 2                          | 0 | 0 | 2       | 0 | 3 | 1                          | 0 | 0  |
| Lymphocytosis               | 0       | 0 | 0 | 0                         | 0 | 0 | 1       | 0 | 0 | 0                          | 0 | 0 | 0       | 0 | 0 | 0                          | 0 | 0  |
| Lymphopenia                 | 0       | 0 | 0 | 0                         | 0 | 0 | 0       | 0 | 0 | 0                          | 0 | 0 | 0       | 0 | 0 | 0                          | 0 | 1* |
| Monocytopenia               | 0       | 0 | 0 | 3                         | 0 | 0 | 0       | 0 | 0 | 2                          | 0 | 0 | 1       | 0 | 3 | 0                          | 0 | 0  |
| Monocytosis                 | 0       | 0 | 0 | 0                         | 0 | 0 | 1       | 0 | 0 | 0                          | 0 | 0 | 3       | 0 | 3 | 0                          | 0 | 0  |
| Neutropenia                 | 1       | 0 | 0 | 1                         | 0 | 0 | 0       | 0 | 0 | 0                          | 0 | 0 | 1       | 1 | 2 | 0                          | 0 | 0  |
| Thrombocytosis              | 0       | 0 | 0 | 0                         | 0 | 0 | 0       | 0 | 0 | 0                          | 0 | 0 | 0       | 0 | 1 | 0                          | 0 | 0  |
| Thrombopenia                | 0       | 0 | 0 | 0                         | 0 | 0 | 0       | 0 | 0 | 0                          | 0 | 0 | 0       | 0 | 1 | 0                          | 0 | 0  |

\* Lymphopenia was 470 per µL (threshold for Grade 3 was 490 per µL).

**Clinical adverse events during CHMI.** Number of adverse events

| Group         | Placebo |   |   | 3.2x10 <sup>3</sup> PfSPZ |   |   | Placebo |   |   | 1.28x10 <sup>4</sup> PfSPZ |   |   | Placebo |   |   | 5.12x10 <sup>4</sup> PfSPZ |   |
|---------------|---------|---|---|---------------------------|---|---|---------|---|---|----------------------------|---|---|---------|---|---|----------------------------|---|
|               | 1       | 2 | 3 | 1                         | 2 | 3 | 1       | 2 | 3 | 1                          | 2 | 3 | 1       | 2 | 3 | 1                          | 2 |
| Cavernoma     | 0       | 0 | 0 | 0                         | 1 | 0 | 0       | 0 | 0 | 0                          | 0 | 0 | 0       | 0 | 0 | 0                          | 0 |
| Chills        | 0       | 0 | 0 | 0                         | 0 | 0 | 0       | 2 | 0 | 0                          | 3 | 0 | 0       | 1 | 0 | 1                          | 0 |
| Cough         | 0       | 0 | 0 | 0                         | 0 | 0 | 0       | 0 | 0 | 1                          | 0 | 0 | 0       | 0 | 0 | 0                          | 0 |
| Diarrhea      | 0       | 0 | 0 | 1                         | 0 | 0 | 0       | 1 | 0 | 0                          | 1 | 0 | 0       | 0 | 0 | 1                          | 0 |
| Dizziness     | 0       | 0 | 1 | 0                         | 0 | 0 | 0       | 0 | 1 | 0                          | 0 | 1 | 0       | 0 | 1 | 0                          | 0 |
| Ear infection | 0       | 0 | 0 | 0                         | 0 | 0 | 0       | 0 | 0 | 0                          | 0 | 0 | 0       | 0 | 0 | 0                          | 1 |
| Faint         | 0       | 0 | 0 | 0                         | 0 | 0 | 0       | 0 | 0 | 0                          | 0 | 0 | 1       | 0 | 0 | 0                          | 0 |
| Fall          | 0       | 0 | 0 | 0                         | 0 | 0 | 0       | 0 | 0 | 0                          | 0 | 0 | 0       | 0 | 0 | 0                          | 1 |
| Fatigue       | 1       | 2 | 1 | 1                         | 4 | 1 | 2       | 1 | 0 | 0                          | 3 | 0 | 0       | 3 | 1 | 0                          | 1 |
| Fever         | 1       | 2 | 1 | 2                         | 2 | 0 | 0       | 2 | 0 | 0                          | 0 | 0 | 1       | 1 | 0 | 0                          | 1 |
| Flu           | 1       | 0 | 0 | 1                         | 1 | 0 | 1       | 1 | 0 | 2                          | 1 | 0 | 0       | 0 | 0 | 0                          | 1 |

|                         |   |   |   |   |   |   |   |   |   |   |   |   |   |   |   |   |   |
|-------------------------|---|---|---|---|---|---|---|---|---|---|---|---|---|---|---|---|---|
| Gastritis               | 0 | 0 | 0 | 0 | 0 | 0 | 0 | 0 | 0 | 0 | 0 | 0 | 0 | 1 | 0 | 0 | 0 |
| Gastroenteritis         | 0 | 0 | 0 | 0 | 0 | 0 | 0 | 0 | 0 | 0 | 1 | 0 | 0 | 0 | 0 | 0 | 0 |
| Headache                | 1 | 2 | 1 | 3 | 4 | 1 | 2 | 2 | 1 | 0 | 2 | 1 | 0 | 4 | 0 | 2 | 1 |
| Hematuria               | 0 | 0 | 0 | 0 | 0 | 0 | 0 | 0 | 0 | 0 | 1 | 0 | 0 | 0 | 0 | 0 | 0 |
| Hypothyroidism          | 0 | 0 | 0 | 0 | 1 | 0 | 0 | 0 | 0 | 0 | 0 | 0 | 0 | 0 | 0 | 0 | 0 |
| Leg pain                | 0 | 0 | 0 | 0 | 0 | 0 | 0 | 0 | 0 | 0 | 0 | 0 | 0 | 1 | 0 | 0 | 0 |
| Myalgia                 | 0 | 2 | 1 | 1 | 4 | 1 | 0 | 2 | 0 | 0 | 3 | 0 | 0 | 3 | 1 | 0 | 1 |
| Nausea                  | 0 | 1 | 1 | 1 | 3 | 1 | 0 | 3 | 0 | 0 | 2 | 0 | 0 | 3 | 0 | 1 | 0 |
| Rhinitis                | 0 | 0 | 0 | 0 | 0 | 0 | 0 | 0 | 0 | 1 | 0 | 0 | 0 | 0 | 0 | 0 | 0 |
| Rigor                   | 0 | 1 | 1 | 0 | 2 | 0 | 0 | 0 | 0 | 0 | 0 | 0 | 0 | 0 | 0 | 0 | 0 |
| Skin lesion excision    | 0 | 0 | 0 | 0 | 0 | 0 | 0 | 0 | 0 | 0 | 0 | 0 | 0 | 0 | 0 | 0 | 1 |
| Sore throat             | 0 | 0 | 0 | 0 | 0 | 0 | 0 | 0 | 0 | 1 | 0 | 0 | 0 | 1 | 0 | 0 | 0 |
| Sweating                | 0 | 0 | 0 | 0 | 0 | 0 | 0 | 0 | 0 | 0 | 0 | 0 | 0 | 1 | 0 | 0 | 0 |
| Tachycardia             | 1 | 0 | 0 | 2 | 0 | 0 | 2 | 0 | 0 | 0 | 0 | 0 | 0 | 0 | 0 | 1 | 0 |
| Toe injury              | 0 | 0 | 0 | 0 | 0 | 0 | 0 | 0 | 0 | 1 | 0 | 0 | 0 | 0 | 0 | 0 | 0 |
| Tonsillitis             | 0 | 0 | 0 | 0 | 0 | 0 | 0 | 1 | 0 | 0 | 0 | 0 | 0 | 0 | 0 | 0 | 0 |
| Tooth infection         | 0 | 1 | 0 | 0 | 0 | 0 | 0 | 0 | 0 | 0 | 0 | 0 | 0 | 0 | 0 | 0 | 0 |
| Urinary tract infection | 0 | 0 | 0 | 0 | 0 | 0 | 0 | 0 | 0 | 0 | 0 | 0 | 0 | 0 | 0 | 0 | 1 |
| Vomiting                | 0 | 0 | 0 | 0 | 0 | 0 | 0 | 0 | 0 | 0 | 0 | 0 | 0 | 0 | 0 | 1 | 0 |

Laboratory adverse events during CHMI. Number of adverse events

| Group                       | Placebo |   |   | 3.2x10 <sup>3</sup> PfSPZ |   |   | Placebo |   |   | 1.28x10 <sup>4</sup> PfSPZ |   |   | Placebo |   | 5.12x10 <sup>4</sup> PfSPZ |  |
|-----------------------------|---------|---|---|---------------------------|---|---|---------|---|---|----------------------------|---|---|---------|---|----------------------------|--|
|                             | 1       | 2 | 3 | 1                         | 2 | 3 | 1       | 2 | 1 | 2                          | 3 | 1 | 2       | 1 | 2                          |  |
| ALT increased               | 1       | 0 | 0 | 0                         | 0 | 0 | 1       | 0 | 3 | 1                          | 0 | 1 | 0       | 2 | 0                          |  |
| Anemia                      | 2       | 0 | 0 | 1                         | 0 | 0 | 2       | 1 | 7 | 0                          | 0 | 1 | 3       | 1 | 0                          |  |
| Basophilia                  | 0       | 0 | 0 | 2                         | 0 | 0 | 2       | 0 | 2 | 0                          | 0 | 1 | 0       | 0 | 0                          |  |
| Blood basophils decreased   | 0       | 0 | 0 | 2                         | 0 | 0 | 0       | 0 | 3 | 0                          | 0 | 1 | 0       | 3 | 0                          |  |
| Blood creatinine decreased  | 0       | 0 | 0 | 1                         | 0 | 0 | 0       | 0 | 0 | 0                          | 0 | 0 | 0       | 0 | 0                          |  |
| Blood eosinophils decreased | 0       | 0 | 0 | 2                         | 0 | 0 | 0       | 0 | 1 | 0                          | 0 | 0 | 0       | 3 | 0                          |  |
| Blood eosinophils increased | 1       | 0 | 0 | 5                         | 0 | 0 | 3       | 0 | 3 | 0                          | 0 | 0 | 0       | 2 | 0                          |  |
| Blood neutrophils increased | 0       | 0 | 0 | 0                         | 0 | 0 | 2       | 0 | 1 | 0                          | 0 | 0 | 0       | 0 | 0                          |  |
| Creatinine blood increased  | 0       | 0 | 0 | 1                         | 0 | 0 | 2       | 0 | 0 | 0                          | 0 | 1 | 0       | 2 | 0                          |  |
| Erythrocytes decreased      | 0       | 0 | 0 | 0                         | 0 | 0 | 0       | 0 | 2 | 0                          | 0 | 2 | 0       | 4 | 0                          |  |
| GOT increased               | 2       | 0 | 0 | 1                         | 0 | 0 | 1       | 0 | 3 | 1                          | 0 | 1 | 1       | 1 | 0                          |  |
| Hematocrit decreased        | 4       | 0 | 0 | 7                         | 0 | 0 | 5       | 0 | 7 | 0                          | 0 | 2 | 0       | 8 | 0                          |  |
| Hemoglobin increased        | 0       | 0 | 0 | 0                         | 0 | 0 | 0       | 0 | 1 | 0                          | 0 | 0 | 0       | 0 | 0                          |  |
| Hyperglycemia               | 0       | 0 | 0 | 0                         | 0 | 0 | 0       | 0 | 1 | 0                          | 0 | 0 | 0       | 0 | 0                          |  |
| LDH                         | 2       | 0 | 0 | 4                         | 0 | 0 | 5       | 0 | 5 | 0                          | 0 | 2 | 0       | 5 | 0                          |  |
| Leucocytosis NOS            | 1       | 0 | 0 | 2                         | 0 | 0 | 3       | 0 | 1 | 0                          | 0 | 1 | 0       | 1 | 0                          |  |
| Leucopenia                  | 3       | 1 | 0 | 4                         | 0 | 0 | 1       | 0 | 3 | 0                          | 0 | 2 | 0       | 0 | 0                          |  |
| Lymphadenopathy             | 0       | 0 | 0 | 0                         | 0 | 0 | 0       | 0 | 0 | 1                          | 0 | 0 | 0       | 0 | 0                          |  |
| Lymphocytosis               | 0       | 0 | 0 | 0                         | 1 | 0 | 2       | 0 | 0 | 0                          | 0 | 0 | 0       | 0 | 0                          |  |
| Lymphopenia                 | 1       | 1 | 0 | 2                         | 1 | 2 | 0       | 1 | 0 | 1                          | 1 | 1 | 1       | 0 | 0                          |  |
| Monocytopenia               | 0       | 0 | 0 | 1                         | 0 | 0 | 0       | 0 | 1 | 0                          | 0 | 2 | 0       | 0 | 0                          |  |
| Monocytosis                 | 4       | 0 | 0 | 1                         | 0 | 0 | 3       | 1 | 2 | 0                          | 0 | 3 | 0       | 1 | 0                          |  |
| Neutropenia                 | 1       | 1 | 0 | 1                         | 0 | 0 | 0       | 0 | 0 | 0                          | 0 | 1 | 0       | 1 | 0                          |  |

|                      |   |   |   |   |   |   |   |   |   |   |   |   |   |   |   |
|----------------------|---|---|---|---|---|---|---|---|---|---|---|---|---|---|---|
| Thrombocytosis       | 1 | 0 | 0 | 0 | 0 | 0 | 0 | 0 | 1 | 0 | 0 | 0 | 0 | 0 | 0 |
| Thrombopenia         | 0 | 1 | 1 | 0 | 0 | 0 | 0 | 0 | 0 | 2 | 0 | 0 | 0 | 0 | 1 |
| Vitamin D deficiency | 0 | 0 | 0 | 0 | 0 | 0 | 0 | 0 | 0 | 0 | 0 | 0 | 0 | 0 | 1 |

**Supplementary Table S2 | PfCSP ELISA, aIFA, and ISI (75% inhibition) results at 2 weeks and 8 weeks after the third dose of vaccine.**

| PfSPZ/<br>Dose       | Volunteer<br>ID | Protected<br>Against<br>CHMI | ISI (75%<br>inhibition)<br>Pre-<br>Immune | 2 Weeks Post 3 <sup>rd</sup> Dose |                 |                            | 8 Weeks Post 3 <sup>rd</sup> Dose |                 |                            |
|----------------------|-----------------|------------------------------|-------------------------------------------|-----------------------------------|-----------------|----------------------------|-----------------------------------|-----------------|----------------------------|
|                      |                 |                              |                                           | PfCSP<br>Net<br>OD 1.0            | aIFA<br>(PfSPZ) | ISI<br>(75%<br>inhibition) | PfCSP<br>Net OD<br>1.0            | aIFA<br>(PfSPZ) | ISI<br>(75%<br>inhibition) |
| 3.2x10 <sup>3</sup>  | 002             | Yes                          | 15.59                                     | 427                               | 76.04           | 15.67                      | 215                               | 65.29           | 10.19                      |
|                      | 050             | No                           | 15.34                                     | 362                               | 265.00          | 27.39                      | 138                               | 73.15           | 33.16                      |
|                      | 007             | No                           | 23.84                                     | 150                               | 111.50          | 16.75                      | 106                               | 80.11           | 3.61                       |
|                      | 034             | No                           | 21.22                                     | 149                               | 0               | 29.91                      | 124                               | 6.26            | 18.91                      |
|                      | 046             | No                           | 2.77                                      | 126                               | 93.67           | 16.88                      | 19                                | 71.44           | 15.70                      |
|                      | 006             | Yes                          | 23.52                                     | 38                                | 33.12           | 43.74                      | 40                                | 0               | 25.23                      |
|                      | 030             | No                           | 6.14                                      | 11                                | 0               | 9.33                       | -2                                | 0               | 3.26                       |
|                      | 012             | No                           | 2.47                                      | -9                                | 0               | 1.00                       | -12                               | 0               | 1.00                       |
|                      | 015             | Yes                          | 1.00                                      | -1425                             | 73.96           | 1.00                       | -5551                             | 50.44           | 10.78                      |
|                      | <b>Median</b>   |                              |                                           | <b>15.34</b>                      | <b>126</b>      | <b>73.96</b>               | <b>16.75</b>                      | <b>40</b>       | <b>50.44</b>               |
| 1.28x10 <sup>4</sup> | 049             | Yes                          | 12.74                                     | 10835                             | 5592.38         | 58.78                      | 7216                              | 1083.53         | 47.98                      |
|                      | 018             | Yes                          | 1.00                                      | 802                               | 120.40          | 13.57                      | 1289                              | 78.28           | 38.56                      |
|                      | 038             | Yes                          | 16.32                                     | 696                               | 164.44          | 50.08                      | 1091                              | 82.47           | 44.63                      |
|                      | 028             | No                           | 1.00                                      | 498                               | 76.04           | 12.08                      | 797                               | 76.20           | 20.37                      |
|                      | 022             | No                           | 18.20                                     | 397                               | 789.41          | 47.61                      | 735                               | 483.74          | 12.41                      |
|                      | 039             | Yes                          | 1.00                                      | 299                               | 72.86           | 4.64                       | 110                               | 74.53           | 9.87                       |
|                      | 064             | Yes                          | 1.00                                      | 276                               | 400.16          | 4.98                       | 236                               | 176.81          | 10.64                      |
|                      | 067             | Yes                          | 3.28                                      | 155                               | 171.22          | 16.58                      | 163                               | 104.28          | 5.41                       |
|                      | 010             | No                           | 17.82                                     | 109                               | 121.89          | 2.71                       | 128                               | 73.10           | 8.24                       |
|                      | <b>Median</b>   |                              |                                           | <b>3.28</b>                       | <b>397</b>      | <b>164.44</b>              | <b>13.57</b>                      | <b>735</b>      | <b>82.47</b>               |
| 5.12x10 <sup>4</sup> | 072             | Yes                          | 5.87                                      | 67088                             | 14496.24        | 158.49                     | 34651                             | 7693.12         | 52.38                      |
|                      | 071             | Yes                          | 17.70                                     | 30518                             | 15009.49        | 152.26                     | 11503                             | 5573.98         | 141.47                     |
|                      | 051             | Yes                          | 4.09                                      | 15914                             | 8817.87         | 79.06                      | 9056                              | 2127.35         | 77.25                      |
|                      | 073             | Yes                          | 1.00                                      | 12964                             | 4025.73         | 94.27                      | 5493                              | 1514.38         | 112.75                     |
|                      | 042             | Yes                          | 4.50                                      | 3844                              | 4630.11         | 35.19                      | 1536                              | 1756.16         | 26.61                      |
|                      | 052             | Yes                          | 16.70                                     | 3180                              | 239.82          | 19.79                      | 2025                              | 183.93          | 27.12                      |
|                      | 017             | Yes                          | 27.18                                     | 1621                              | 599.48          | 43.64                      | 849                               | 259.55          | 15.76                      |
|                      | 035             | Yes                          | 23.01                                     | 1529                              | 669.49          | 21.46                      | 632                               | 236.94          | 29.91                      |
|                      | 026             | Yes                          | 6.65                                      | 1357                              | 480.70          | 20.31                      | 466                               | 241.21          | 22.97                      |
|                      | <b>Median</b>   |                              |                                           | <b>6.65</b>                       | <b>3844</b>     | <b>4025.73</b>             | <b>43.64</b>                      | <b>2025</b>     | <b>1514.38</b>             |

There was a dose response for antibodies at 2 weeks after the third dose of PfSPZ Challenge to PfCSP by ELISA (Spearman rho = 0.84,  $P < 0.0001$ ), PfSPZ by aIFA (Spearman's rho = 0.80,  $P < 0.0001$ ), and PfSPZ by ISI (rho = 0.51,  $P = 0.007$ ). There was also a dose response at 8 weeks after the third dose of PfSPZ Challenge to PfCSP (rho = 0.82,  $P < 0.0001$ ), aIFA (rho = 0.87,  $P < 0.0001$ ), and ISI (rho = 0.59,  $P = 0.0013$ ). The results of these three assays were highly correlated with each other at 2 weeks (PfCSP versus aIFA, rho = 0.85,  $P < 0.0001$ ; PfCSP vs ISI, rho = 0.73,  $P < 0.0001$ ; aIFA vs ISI, rho = 0.71,  $P < 0.0001$ ) and at 8 weeks (PfCSP vs aIFA, rho = 0.88,  $P < 0.0001$ ; PfCSP vs ISI, rho = 0.8028,  $P < 0.0001$ ; aIFA vs ISI, rho = 0.64,  $P = 0.0003$ ) after the third dose of PfSPZ Challenge. Volunteer IDs in red designate protected subjects and those in black designate unprotected subjects.

**Supplementary Table S3** | PfCSP ELISA levels 7-14 days after the first, second, and third doses of PfSPZ-CVac.

| PfSPZ/<br>Dose       | Vol.<br>ID    | Protected<br>Against<br>CHMI | 11 Days Post 1 <sup>st</sup> Dose |            | # Subjects<br>Positive for<br>Antibodies<br>(%) | 7 Days Post 2 <sup>nd</sup> Dose |            | # Subjects<br>Positive for<br>Antibodies<br>(%) | 14 Days Post 3 <sup>rd</sup> Dose |             | # Subjects<br>Positive for<br>Antibodies<br>(%) |
|----------------------|---------------|------------------------------|-----------------------------------|------------|-------------------------------------------------|----------------------------------|------------|-------------------------------------------------|-----------------------------------|-------------|-------------------------------------------------|
|                      |               |                              | OD 1.0                            |            |                                                 | OD 1.0                           |            |                                                 | OD 1.0                            |             |                                                 |
|                      |               |                              | Net                               | Ratio      |                                                 | Net                              | Ratio      |                                                 | Net                               | Ratio       |                                                 |
| 3.2x10 <sup>3</sup>  | 002           | Yes                          | -23                               | 0.8        | 0/9<br>(0%)                                     | 25                               | 1.2        | 0/9<br>(0%)                                     | 238                               | 3.1         | 4/9<br>(44%)                                    |
|                      | 006           | Yes                          | -28                               | 0.7        |                                                 | -7                               | 0.9        |                                                 | 37                                | 1.4         |                                                 |
|                      | 007           | No                           | -14                               | 0.8        |                                                 | 7                                | 1.1        |                                                 | 150                               | 2.6         |                                                 |
|                      | 012           | No                           | 0                                 | 1.0        |                                                 | 8                                | 9.0        |                                                 | 0                                 | 1.0         |                                                 |
|                      | 015           | Yes                          | -3245                             | 0.7        |                                                 | -1084                            | 0.9        |                                                 | 29,931                            | 4.2         |                                                 |
|                      | 030           | No                           | -6                                | 0.8        |                                                 | -3                               | 0.9        |                                                 | -13                               | 0.6         |                                                 |
|                      | 034           | No                           | 38                                | 1.6        |                                                 | -2                               | 1.0        |                                                 | 195                               | 4.2         |                                                 |
|                      | 046           | No                           | 14                                | 1.1        |                                                 | -8                               | 1.0        |                                                 | 64                                | 1.4         |                                                 |
|                      | 050           | No                           | -17                               | 0.8        |                                                 | -25                              | 0.8        |                                                 | 289                               | 3.8         |                                                 |
|                      | <b>Median</b> |                              | <b>-14</b>                        | <b>0.8</b> |                                                 | <b>-3</b>                        | <b>1.0</b> |                                                 | <b>150</b>                        | <b>2.6</b>  |                                                 |
| 1.28x10 <sup>4</sup> | 010           | No                           | 1                                 | 1.0        | 0/9<br>(0%)                                     | -3                               | 0.9        | 2/9<br>(22%)                                    | 134                               | 4.9         | 6/9<br>(67%)                                    |
|                      | 018           | Yes                          | -197                              | 0.8        |                                                 | 11                               | 1.0        |                                                 | 181                               | 1.2         |                                                 |
|                      | 022           | No                           | -4                                | 0.9        |                                                 | 23                               | 1.7        |                                                 | 394                               | 12.9        |                                                 |
|                      | 028           | No                           | 22                                | 1.1        |                                                 | -4                               | 1.0        |                                                 | 229                               | 2.5         |                                                 |
|                      | 038           | Yes                          | -25                               | 0.7        |                                                 | 78                               | 2.1        |                                                 | 610                               | 9.4         |                                                 |
|                      | 039           | Yes                          | -186                              | 0.7        |                                                 | -426                             | 0.3        |                                                 | 9                                 | 1.0         |                                                 |
|                      | 049           | Yes                          | 6                                 | 1.2        |                                                 | -34                              | 0.0        |                                                 | 8074                              | 231.7       |                                                 |
|                      | 064           | Yes                          | -50                               | 0.2        |                                                 | 178                              | 3.9        |                                                 | 159                               | 3.6         |                                                 |
|                      | 067           | Yes                          | 4                                 | 1.2        |                                                 | 1,084                            | 50.3       |                                                 | 114                               | 6.2         |                                                 |
|                      | <b>Median</b> |                              | <b>-4</b>                         | <b>0.9</b> |                                                 | <b>11</b>                        | <b>1.0</b> |                                                 | <b>181</b>                        | <b>4.9</b>  |                                                 |
| 5.12x10 <sup>4</sup> | 017           | Yes                          | -20                               | 0.8        | 1/9<br>(11%)                                    | 184                              | 2.6        | 5/9<br>(56%)                                    | 706                               | 7.0         | 9/9<br>(100%)                                   |
|                      | 026           | Yes                          | 1                                 | 1.0        |                                                 | 523                              | 6.9        |                                                 | 850                               | 10.6        |                                                 |
|                      | 035           | Yes                          | -50                               | 0.8        |                                                 | 78                               | 1.4        |                                                 | 854                               | 5.3         |                                                 |
|                      | 042           | Yes                          | -1                                | 1.0        |                                                 | 143                              | 4.6        |                                                 | 2787                              | 70.7        |                                                 |
|                      | 051           | Yes                          | 5                                 | 1.0        |                                                 | -122                             | 0.1        |                                                 | 13,249                            | 99.1        |                                                 |
|                      | 052           | Yes                          | 10                                | 1.1        |                                                 | -78                              | 0.1        |                                                 | 2235                              | 25.6        |                                                 |
|                      | 071           | Yes                          | 20                                | 1.7        |                                                 | 193                              | 8.1        |                                                 | 13,139                            | 487.6       |                                                 |
|                      | 072           | Yes                          | 60                                | 61.0       |                                                 | 72                               | 73.0       |                                                 | 33,340                            | 33,341.0    |                                                 |
|                      | 073           | Yes                          | -11                               | 0.9        |                                                 | 454                              | 4.8        |                                                 | 5580                              | 48.3        |                                                 |
|                      | <b>Median</b> |                              | <b>1</b>                          | <b>1.0</b> |                                                 | <b>143</b>                       | <b>4.6</b> |                                                 | <b>2787</b>                       | <b>48.3</b> |                                                 |

Values are reported as net OD 1.0, which is the OD 1.0 at the specific time point after immunization minus the OD 1.0 prior to immunization, and as OD 1.0 ratio, which is the ratio of the OD 1.0 at the post immunization time point to the OD 1.0 prior to immunization. A value was arbitrarily considered positive if the net OD 1.0 was  $\geq 50$  and the OD 1.0 ratio was  $\geq 3$ . Serum was not available for all time points; therefore, the results in this table are from plasma only. Volunteer IDs in red designate protected subjects and those in black designate unprotected subjects.

Supplementary Table S4 | PfCSP ELISA levels 2, 8 and 12-13 weeks after the third dose of vaccine.

| PfSPZ/<br>Dose       | Vol.<br>ID    | Protected<br>Against<br>CHMI | 2 Weeks Post 3 <sup>rd</sup> Dose |            | # Subjects<br>Positive for<br>Antibodies<br>(%) | 8 Weeks Post 3 <sup>rd</sup> Dose<br>(Pre-CHMI) |             | # Subjects<br>Positive for<br>Antibodies<br>(%) | 12-13 Weeks Post 3 <sup>rd</sup> Dose<br>(4 Weeks Post CHMI) |             | # Subjects<br>Positive for<br>Antibodies<br>(%) |
|----------------------|---------------|------------------------------|-----------------------------------|------------|-------------------------------------------------|-------------------------------------------------|-------------|-------------------------------------------------|--------------------------------------------------------------|-------------|-------------------------------------------------|
|                      |               |                              | OD 1.0                            |            |                                                 | OD 1.0                                          |             |                                                 | OD 1.0                                                       |             |                                                 |
|                      |               |                              | Net                               | Ratio      |                                                 | Net                                             | Ratio       |                                                 | Net                                                          | Ratio       |                                                 |
| 3.2x10 <sup>3</sup>  | 012           | No                           | -9                                | 0.8        | 3/9<br>(33%)                                    | -12                                             | 0.7         | 0/9<br>(0%)                                     | -11                                                          | 0.7         | 1/9<br>(22%)                                    |
|                      | 015           | Yes                          | -1425                             | 0.9        |                                                 | -5551                                           | 0.5         |                                                 | -6669                                                        | 0.4         |                                                 |
|                      | 006           | Yes                          | 38                                | 1.3        |                                                 | 40                                              | 1.3         |                                                 | -33                                                          | 0.8         |                                                 |
|                      | 030           | No                           | 11                                | 1.3        |                                                 | -2                                              | 1.0         |                                                 | 77                                                           | 2.8         |                                                 |
|                      | 046           | No                           | 126                               | 1.5        |                                                 | 19                                              | 1.1         |                                                 | 277                                                          | 2.2         |                                                 |
|                      | 007           | No                           | 150                               | 2          |                                                 | 106                                             | 1.7         |                                                 | 84                                                           | 1.6         |                                                 |
|                      | 034*          | No                           | 149                               | 3.0        |                                                 | 124                                             | 2.7         |                                                 | 78                                                           | 2.0         |                                                 |
|                      | 002*          | Yes                          | 427                               | 3.5        |                                                 | 215                                             | 2.3         |                                                 | 39                                                           | 1.2         |                                                 |
|                      | 050*          | No                           | 362                               | 4.3        |                                                 | 138                                             | 2.2         |                                                 | 338                                                          | 4.0         |                                                 |
|                      | <b>Median</b> |                              | <b>126</b>                        | <b>1.5</b> |                                                 | <b>40</b>                                       | <b>1.3</b>  |                                                 | <b>77</b>                                                    | <b>1.6</b>  |                                                 |
| 1.28x10 <sup>4</sup> | 039           | Yes                          | 299                               | 1.4        | 7/9<br>(78%)                                    | 110                                             | 1.1         | 7/9<br>(78%)                                    | -17                                                          | 1.0         | 5/9<br>(78%)                                    |
|                      | 018           | Yes                          | 802                               | 1.5        |                                                 | 1289                                            | 1.8         |                                                 | 510                                                          | 1.3         |                                                 |
|                      | 010*#         | No                           | 109                               | 3.4        |                                                 | 128                                             | 3.8         |                                                 | 404                                                          | 10.0        |                                                 |
|                      | 028*#         | No                           | 498                               | 4.2        |                                                 | 797                                             | 6.1         |                                                 | 584                                                          | 4.7         |                                                 |
|                      | 067*#         | Yes                          | 155                               | 4.9        |                                                 | 163                                             | 5.1         |                                                 | 65                                                           | 2.6         |                                                 |
|                      | 064*#         | Yes                          | 276                               | 5.5        |                                                 | 236                                             | 4.8         |                                                 | 105                                                          | 2.7         |                                                 |
|                      | 038*#         | Yes                          | 696                               | 7.5        |                                                 | 1091                                            | 11.2        |                                                 | 545                                                          | 6.1         |                                                 |
|                      | 022*#         | No                           | 397                               | 8.1        |                                                 | 735                                             | 14.1        |                                                 | 593                                                          | 11.6        |                                                 |
|                      | 049*#         | Yes                          | 10835                             | 178.6      |                                                 | 7216                                            | 119.3       |                                                 | 4955                                                         | 82.2        |                                                 |
|                      | <b>Median</b> |                              | <b>397</b>                        | <b>4.9</b> |                                                 | <b>735</b>                                      | <b>5.1</b>  |                                                 | <b>510</b>                                                   | <b>4.7</b>  |                                                 |
| 5.12x10 <sup>4</sup> | 035*#         | Yes                          | 1529                              | 6.8        | 9/9<br>(100%)                                   | 632                                             | 3.4         | 9/9<br>(100%)                                   | 964                                                          | 4.7         | 9/9<br>(100%)                                   |
|                      | 017*#         | Yes                          | 1621                              | 10.6       |                                                 | 849                                             | 6.1         |                                                 | 1035                                                         | 7.2         |                                                 |
|                      | 026*#         | Yes                          | 1357                              | 12.2       |                                                 | 466                                             | 4.9         |                                                 | 569                                                          | 5.7         |                                                 |
|                      | 052*#         | Yes                          | 3180                              | 25.7       |                                                 | 2025                                            | 16.7        |                                                 | 1939                                                         | 16.0        |                                                 |
|                      | 051*#         | Yes                          | 15914                             | 73         |                                                 | 9056                                            | 42.0        |                                                 | 11547                                                        | 53.2        |                                                 |
|                      | 042*#         | Yes                          | 3844                              | 84.6       |                                                 | 1536                                            | 34.4        |                                                 | 2596                                                         | 57.4        |                                                 |
|                      | 073*#         | Yes                          | 12964                             | 84.6       |                                                 | 5493                                            | 36.4        |                                                 | 6476                                                         | 42.8        |                                                 |
|                      | 071*#         | Yes                          | 30518                             | 463.4      |                                                 | 11503                                           | 175.3       |                                                 | 12444                                                        | 189.5       |                                                 |
|                      | 072*#         | Yes                          | 67088                             | 1917.8     |                                                 | 34651                                           | 991.0       |                                                 | 49600                                                        | 1418.1      |                                                 |
|                      | <b>Median</b> |                              | <b>3844</b>                       | <b>73</b>  |                                                 | <b>2025</b>                                     | <b>34.4</b> |                                                 | <b>2596</b>                                                  | <b>42.8</b> |                                                 |

Values are reported as net OD 1.0, which is the OD 1.0 at the specific time point after immunization minus the OD 1.0 prior to immunization, and as OD 1.0 ratio, which is the ratio of the OD 1.0 at the post immunization time point to the OD 1.0 prior to immunization. A value was arbitrarily considered positive if the net OD 1.0 was  $\geq 50$  and the OD 1.0 ratio was  $\geq 3$ . (\*) next to volunteer ID denote volunteers positive for both criteria at 2 weeks. (#) next to volunteer ID denote volunteers positive for both criteria at 8 weeks. Volunteer IDs in red designate protected subjects and those in black designate unprotected subjects.

**Supplementary Table S5** | Antibodies to well-defined Pf proteins 2 weeks after the third dose of PfSPZ-CVac. Volunteers were considered seropositive with a net OD 1.0  $\geq$ 50 and a ratio  $\geq$ 3 when compared to readings from pre-immune sera. Values shown are medians.

| Protein                                               | Dose of PfSPZ Challenge     |                         |                           |                             |                         |                           |                             |                         |                           |
|-------------------------------------------------------|-----------------------------|-------------------------|---------------------------|-----------------------------|-------------------------|---------------------------|-----------------------------|-------------------------|---------------------------|
|                                                       | 3.2x10 <sup>3</sup>         |                         |                           | 1.28x10 <sup>4</sup>        |                         |                           | 5.12x10 <sup>4</sup>        |                         |                           |
|                                                       | No. Positive/No. Tested (%) | Net OD 1.0 of Positives | OD 1.0 Ratio of Positives | No. Positive/No. Tested (%) | Net OD 1.0 of Positives | OD 1.0 Ratio of Positives | No. Positive/No. Tested (%) | Net OD 1.0 of Positives | OD 1.0 Ratio of Positives |
| <b>1<sup>st</sup> Expressed in Sporozoites</b>        |                             |                         |                           |                             |                         |                           |                             |                         |                           |
| PfCSP                                                 | 3/9 (33%)                   | 362                     | 3.48                      | 7/9 (78%)                   | 397                     | 5.45                      | 9/9 (100%)                  | 3844                    | 73.01                     |
| PfSSP2/TRAP                                           | 0/9                         | .                       | .                         | 0/9                         | .                       | .                         | 1/9 (11%)                   | 273*                    | 6.81*                     |
| PfCelTOS                                              | 0/9                         | .                       | .                         | 0/9                         | .                       | .                         | 0/9                         | .                       | .                         |
| PfMSP5                                                | 1/9 (11%)                   | 65*                     | 14.00*                    | 2/9 (22%)                   | 325                     | 33.78                     | 5/9 (56%)                   | 452                     | 28.86                     |
| PfAMA1                                                | 0/9                         | .                       | .                         | 1/9 (11%)                   | 192*                    | 5.57*                     | 3/9 (33%)                   | 556                     | 43.77                     |
| <b>1<sup>st</sup> Expressed in Early Liver Stages</b> |                             |                         |                           |                             |                         |                           |                             |                         |                           |
| PfEXP1                                                | 0/9                         | .                       | .                         | 1/9 (11%)                   | 725*                    | 6.80*                     | 1/9 (11%)                   | 6317*                   | 7.41*                     |
| PfLSA1                                                | 0/9                         | .                       | .                         | 0/9                         | .                       | .                         | 3/9 (33%)                   | 1090                    | 12.00                     |
| <b>1<sup>st</sup> Expressed in Late Liver Stages</b>  |                             |                         |                           |                             |                         |                           |                             |                         |                           |
| PfMSP1                                                | 0/9                         | .                       | .                         | 0/9                         | .                       | .                         | 4/9 (44%)                   | 1670                    | 863.00                    |
| PfEBA175                                              | 0/9                         | .                       | .                         | 0/9                         | .                       | .                         | 0/9                         | .                       | .                         |

\*For these values, the single value is recorded, not the median.

**Supplementary Table S6** | Logistic regression of peak antibody levels (2 weeks after final immunization) and baseline antibody levels on probability of sterile protection against CHMI, adjusted by dose of PfSPZ-CVac. (See attached PDF)



**Supplementary Table S7** | ELISA measuring antibodies against proteins expressed in sporozoites (PfCSP, PfSSP2/TRAP, PfCeITOS, PfMSP5, PfAMA1), early liver stages (PfEXP1 and PfLSA1) and late liver/blood stages (PfMSP1 and PfEBA175).

| Recombinant Protein Details |                                                                                                                                                                                                                                                                                                                                                                                                                                                                                   |
|-----------------------------|-----------------------------------------------------------------------------------------------------------------------------------------------------------------------------------------------------------------------------------------------------------------------------------------------------------------------------------------------------------------------------------------------------------------------------------------------------------------------------------|
| <b>PfCSP</b>                | The recombinant <i>P. falciparum</i> (Pf) circumsporozoite protein (rPfCSP, 3D7 strain) is a 48 kDa protein with an N-terminal sequence SLGEND, approximately 299 amino acids in length, without the signal sequence. The 1 <sup>st</sup> amino acid is residue 50 at the N-terminus and comprising both the N- and C-portions with 22 NANP and 4 NVDP repeats, without the last 13 amino acids of the C-terminal portion. GenBank Accession No.: ADF48458.1 (Protein Potential). |
| <b>PfSSP2/TRAP</b>          | The recombinant Pf sporozoite surface protein 2 (recombinant fragment of PfSSP2, 3D7) is a 27 kDa protein. The rPfSSP2 lacks the hydrophobic regions at the amino terminus (22 aa) and the C-terminus (63 aa). The sequence selected for expression is the entire extracellular domain of PfSSP2, which includes the A-type domain (of von Willebrand factor) and the type 1 repeat of thrombospondin (TSR). GenBank Accession No.: AAC18657.1 (Protein Potential).               |
| <b>PfMSP5</b>               | The recombinant Pf merozoite surface protein-5 is a 40-kDa protein that is located on the merozoite surface and is non-covalently associated with merozoite surface protein 1 (MSP1) complex shed from the surface at erythrocyte invasion. GenBank Accession No: AAF12722.1 (Ross Coppel, Monash University, Australia).                                                                                                                                                         |
| <b>PfCeITOS</b>             | The recombinant Pf cell-traversal protein for ookinetes and sporozoites (rPfCeITOS) is an 18 kDa protein with an N-terminal sequence FRGNNG. It is approximately 151 amino acids in length, with the first amino acid being residue 25 at the N-terminus without the hydrophobic signal sequence. GenBank Accession No.: BAD97684.1 (Protein Potential).                                                                                                                          |
| <b>PfMSP1</b>               | PfMSP142 (EcMSP142-3D7, Lot# WRAIR11150, 0.99 mg/mL) is a recombinant of the C-terminal 42-kDa portion of the merozoite surface protein-1 (PfMSP1) from the 3D7 strain of Pf expressed, refolded, and purified at the Walter Reed Army Institute of Research (WRAIR) Pilot Bioproduction Facility. GenBank Accession Number: ABS84655.1 (WRAIR).                                                                                                                                  |
| <b>PfAMA1</b>               | The recombinant Pf apical membrane antigen-1 PfAMA1 (rPfAMA1-3D7, Lot# MV-1187 Final Bulk Protein, 1.00 mg/mL). The rPfAMA1-3D7 represents the ectodomain of the protein. GenBank Accession No: AAN35928.1 (Carole Long, NIAID, NIH).                                                                                                                                                                                                                                             |
| <b>PfEBA175</b>             | The recombinant Pf erythrocyte binding antigen-175 (rPfEBA175 RII, Lot# 321-0904-007, 2.38 mg/mL) region II with an N-terminal sequence GRQTSS, approximately 616 amino acids in length. GenBank Accession No.: AAF72186.1 (Protein Potential).                                                                                                                                                                                                                                   |
| <b>PfLSA1</b>               | Recombinant PfLSA1 (recombinant 22-kDa Lot# 061907, 0.50 mg/mL). The recombinant Pf liver stage antigen-1, rPfLSA1 is a 22-kDa protein with an N-terminal sequence KENKLN, approximately 259 amino acids in length, the first amino acid being residue 28 at the N-terminus and truncated at residue 286 at the C-terminus. GenBank Accession No.: AAW78332.1 (Protein Potential).                                                                                                |
| <b>PfEXP1</b>               | Pf exported protein-1 (rPfEXP1, 23-kDa Lot# 010507, 1.00 mg/mL). The recombinant Pf exported protein-1 is a 23 kDa protein with an N-terminal sequence SLAEKT and is approximately 143 amino acids in length, with the hydrophobic signal sequence removed. GenBank Accession No.: CAA28735.1 (Protein Potential).                                                                                                                                                                |

**Assay details**

| Pf antigens                                     | CSP                                                                                                                                       | SSP2       | MSP5       | CeITOS     | MSP1       | AMA1       | EBA175     | LSA1       | EXP1       |
|-------------------------------------------------|-------------------------------------------------------------------------------------------------------------------------------------------|------------|------------|------------|------------|------------|------------|------------|------------|
| Coating antigen concentration in 50 µL per well | 2.0 µg /mL                                                                                                                                | 1.5 µg /mL | 2.0 µg /mL | 1.5 µg /mL | 1.5 µg /mL | 2.0 µg /mL | 1.0 µg /mL | 1.0 µg /mL | 0.5 µg /mL |
| Washing Buffer                                  | 1X Imidazole-based wash solution containing 2 mM imidazole, 160 mM NaCl, 0.02% Tween 20, 0.5 mM EDTA (wash 3 times after each incubation) |            |            |            |            |            |            |            |            |
| Blocking buffer composition (diluent)           | 1% Bovine Serum Albumin (BSA) blocking buffer (KPL)                                                                                       |            |            |            |            |            |            |            |            |
| Serum                                           | 1% milk                                                                                                                                   | 5% milk    | 1% milk    | 5% milk    | 5% milk    | 1% milk    | 5% milk    | 1% milk    | 1% milk    |
| Secondary ab                                    | 1:100 starting dilution and three fold serial dilution in triplicate                                                                      |            |            |            |            |            |            |            |            |
| Secondary ab                                    | Peroxidase labeled goat anti-human IgG (KPL)                                                                                              |            |            |            |            |            |            |            |            |
| Secondary ab                                    | 0.1                                                                                                                                       | 0.1        | 0.1        | 0.1        | 0.1        | 0.1        | 0.05       | 0.2        | 0.1        |

| concentration $\mu\text{g/mL}$                 |  | ABTS Peroxidase substrate |         |         |         |         |         |         |         |         |
|------------------------------------------------|--|---------------------------|---------|---------|---------|---------|---------|---------|---------|---------|
| Substrate                                      |  | 75 mins                   | 60 mins | 75 mins | 60 mins | 45 mins | 75 mins | 45 mins | 60 mins | 50 mins |
| Substrate incubation period (Room temperature) |  |                           |         |         |         |         |         |         |         |         |

Supplementary Table S8 | Flow cytometry staining panels.

| #  | Detector | Fluorophore              | Antibody specificity        |                             |                             |
|----|----------|--------------------------|-----------------------------|-----------------------------|-----------------------------|
|    |          |                          | PfSPZ Panel 1               | PfRBC Panel 2               | PfRBC Panel 3               |
| 1  | B515     | FITC                     | Ki-67                       |                             | TCR-V $\delta$ 1            |
| 2  | B710     | Cy5.5PerCP               | TCR-V $\alpha$ 7.2          |                             |                             |
| 3  | V440     | BV421                    | PD-1                        | CD127                       | IL-4                        |
| 4  | V510     | Aqua/BV510 <sup>†</sup>  | Viability/CD14 <sup>†</sup> | Viability/CD14 <sup>†</sup> | Viability/CD14 <sup>†</sup> |
| 5  | V570     | BV570                    |                             |                             |                             |
| 6  | V605     | BV605                    | IL-2                        | IL-2                        |                             |
| 7  | V650     | BV650                    | TNF- $\alpha$               | TNF- $\alpha$               |                             |
| 8  | V710     | BV711/QD705 <sup>#</sup> | CD56                        | CD57 <sup>#</sup>           |                             |
| 9  | V750     | BV750                    |                             |                             |                             |
| 10 | V800     | BV785                    | CD4                         | CD4                         | CD4                         |
| 11 | R660     | APC                      | IFN- $\gamma$               | IFN- $\gamma$               | TCR-V $\gamma$ 9            |
| 12 | R710     | Ax680                    | CCR7                        | CCR7                        | CCR7                        |
| 13 | R780     | Cy7APC                   | CD3                         | CD3                         | CD3                         |
| 14 | G560     | PE                       | CXCR6                       | Perforin                    | IL-10                       |
| 15 | G610     | CF594PE                  | TCR- $\gamma\delta$         | TCR- $\gamma\delta$         | TCR- $\gamma\delta$         |
| 16 | G660     | Cy5PE                    | CD161                       | CD38                        | TCR-V $\delta$ 2            |
| 17 | G710     | Cy5.5PE                  | CD45RA                      | CD45RA                      | CD45RA                      |
| 18 | G780     | Cy7PE                    | CD8                         | CD8                         | CD8                         |

Three flow cytometry staining panels were developed to assess the magnitude, quality, and phenotype of Pf-specific lymphocytes. Each of the three panels allow for the identification of  $\gamma\delta$ , CD4, and CD8 T cell lineages, each of which have been shown to contribute to immunity against liver stage malaria in animal models with SPZ vaccines. Within each lineage, naïve, central memory (T<sub>CM</sub>), effector memory (T<sub>EM</sub>), and terminal effector memory (TE) subsets can be identified on the basis of CD45RA and CCR7 expression.

*Panels 1 and 2* allow for identification of Pf-specific cells by intracellular cytokine staining of IFN- $\gamma$ , IL-2, or TNF- $\alpha$  following antigen stimulation.

*Panel 1* includes the following phenotypic markers:

CXCR6, a chemokine receptor expressed by tissue-resident T cells trafficking in the liver

PD-1, a marker of cellular activation that can influence T cell function

Ki-67, a transcription factor expressed in cells that have recently undergone cell division

*Panel 1* stains for NK and MAIT cell subsets. MAIT cells were identified by CD161<sup>++</sup>CD4<sup>-</sup>CD8<sup>+</sup>CD45RA<sup>-</sup>CCR7<sup>-</sup>CXCR6<sup>+</sup> (Wingender G & Kronenberg M, *Cytometry Part A*, 2015).

*Panel 2* includes the following phenotypic markers:

CD38, a marker of T cell activation

Perforin, an effector molecule

CD127, differentiation markers

*Panel 3* allows for identification of Pf-specific cells by intracellular cytokine staining of IL-4 and IL-10 following antigen stimulation.

*Panel 3* allows for the identification of the  $\gamma\delta$  T cell subfamilies defined by the expression of V $\gamma$ 9, V $\delta$ 1, or V $\delta$ 2 TCRs.

PBMCs were stained following stimulation with:

*Panel 1*

1. PfSPZ Vaccine ( $1.5 \times 10^5$  PfSPZ)

2. Vaccine diluent (1% HSA)

*Panel 2 and 3*

3. Pf-infected erythrocytes ( $2.0 \times 10^5$  PfRBC)

4. Uninfected erythrocytes ( $2.0 \times 10^5$  uRBC)

**Supplementary Table S9** | Flow cytometry antibody clones and manufacturers.

| Specificity         | Fluorophore | Clone     | Manufacturer     | Catalog    |
|---------------------|-------------|-----------|------------------|------------|
| CD3                 | Cy7APC      | SP34.2    | BD               | 557757     |
| CD4                 | BV785       | OKT4      | BioLegend        | 317441     |
| CD8                 | Cy7PE       | RPA-T8    | BioLegend        | 301012     |
| CD14                | BV510       | M5E2      | BioLegend        | 301842     |
| CD38                | Cy5PE       | HIT2      | BD               | 555461     |
| CD45RA              | Cy5.5PE     | MEM-56    | Invitrogen       | MHCD45RA18 |
| CD56                | BV711       | NCAM16.2  | BD               | 563169     |
| TCR-V $\alpha$ 7.2  | Cy5.5PerCP  | 3C10      | BioLegend        | 351710     |
| CD161               | Cy5PE       | DX12      | BD               | 551138     |
| TCR- $\gamma\delta$ | CF594PE     | B1        | BD               | 562511     |
| TCR-V $\delta$ 1    | FITC        | TS8.2     | ThermoScientific | TCR2730    |
| TCR-V $\delta$ 2    | Cy5PE       | B6        | VRC              | --         |
| TCR-V $\gamma$ 9    | APC         | B3        | BioLegend        | 331310     |
| CXCR6               | PE          | K041E5    | BioLegend        | 356004     |
| CCR7                | Ax680       | 150503    | VRC              | --         |
| PD-1                | BV421       | EH12.2H7  | BioLegend        | 329920     |
| IFN- $\gamma$       | APC         | 4S.B3     | BioLegend        | 502512     |
| IL-2                | BV605       | MQ1-17H12 | BioLegend        | 500331     |
| TNF- $\alpha$       | BV650       | MAb11     | BioLegend        | 502937     |
| Perforin            | PE          | B-D48     | BioLegend        | 353303     |
| Ki-67               | FITC        | B56       | BD               | 556026     |
| CD127               | BV421       | A019D5    | BioLegend        | 351310     |
| CD57                | QD705       | NK-1      | VRC              | --         |
| IL-4                | BV421       | MP4-25D2  | BD               | 564110     |
| IL-10               | PE          | JES3-9D7  | BioLegend        | 501404     |

Fluorophore-conjugated antibodies were used to stain PBMCs. Different combinations of antibodies were used in different staining panels, as described elsewhere in the Supplementary information.
