# Supplementary material
Source: PubMed Central journal article supplement (PMC10906480)
Supplement: NIHMS985382-supplement-Table_S7.pdf [file NIHMS985382-supplement-Table_S7.pdf]

**Table S6: Logistic regression of peak antibody levels (2 weeks after final immunization) and baseline antibody**

\* BH: Benjamini-Hochberg adjustment of P-values for the false discovery rate

|               | Coefficient<br>Peak Antibody<br>Levels | P-value Peak<br>Antibody<br>Levels | BH* P-value<br>Peak Antibody<br>Levels | Coefficient<br>Baseline<br>Antibody Levels | P-value<br>Baseline<br>Antibody | BH P-value<br>Baseline<br>Antibody |
|---------------|----------------------------------------|------------------------------------|----------------------------------------|--------------------------------------------|---------------------------------|------------------------------------|
| PF3D7_1335300 | -3.11                                  | 0.216                              | 0.918                                  | 4.2                                        | 0.109                           | 0.919                              |
| PF3D7_1012200 | 2.07                                   | 0.389                              | 0.918                                  | -0.128                                     | 0.964                           | 0.996                              |
| PF3D7_0609500 | 8.46                                   | 0.109                              | 0.918                                  | -2.83                                      | 0.657                           | 0.95                               |
| PF3D7_1312600 | 0.432                                  | 0.827                              | 0.959                                  | 0.521                                      | 0.831                           | 0.972                              |
| PF3D7_0530500 | 27.3                                   | 0.0659                             | 0.918                                  | -14                                        | 0.138                           | 0.919                              |
| PF3D7_1019400 | 0.0909                                 | 0.981                              | 0.997                                  | -0.073                                     | 0.985                           | 0.998                              |
| PF3D7_0826300 | -1.69                                  | 0.242                              | 0.918                                  | 0.806                                      | 0.661                           | 0.951                              |
| PF3D7_0101300 | 5.75                                   | 0.187                              | 0.918                                  | -4.97                                      | 0.262                           | 0.919                              |
| PF3D7_1428300 | 0.59                                   | 0.688                              | 0.927                                  | 2.14                                       | 0.416                           | 0.919                              |
| PF3D7_1012300 | -4.93                                  | 0.249                              | 0.918                                  | 4.06                                       | 0.541                           | 0.924                              |
| PF3D7_1206800 | -3.41                                  | 0.189                              | 0.918                                  | 2.09                                       | 0.407                           | 0.919                              |
| PF3D7_1358200 | 8.37                                   | 0.128                              | 0.918                                  | -6.99                                      | 0.143                           | 0.919                              |
| PF3D7_1431500 | 1.99                                   | 0.659                              | 0.921                                  | -2.87                                      | 0.503                           | 0.924                              |
| PF3D7_0606100 | -1.12                                  | 0.472                              | 0.918                                  | 1.26                                       | 0.431                           | 0.919                              |
| PF3D7_1432300 | -0.251                                 | 0.796                              | 0.952                                  | 0.423                                      | 0.668                           | 0.954                              |
| PF3D7_0720900 | 8.34                                   | 0.304                              | 0.918                                  | 3.12                                       | 0.676                           | 0.954                              |
| PF3D7_1226300 | -2.33                                  | 0.507                              | 0.918                                  | 2.32                                       | 0.511                           | 0.924                              |
| PF3D7_0523700 | 0.584                                  | 0.676                              | 0.923                                  | 0.675                                      | 0.643                           | 0.95                               |
| PF3D7_0424600 | -0.725                                 | 0.405                              | 0.918                                  | 2.35                                       | 0.155                           | 0.919                              |
| PF3D7_1248400 | 1.14                                   | 0.596                              | 0.918                                  | -2.06                                      | 0.527                           | 0.924                              |
| PF3D7_1419100 | 2.48                                   | 0.559                              | 0.918                                  | -2.07                                      | 0.634                           | 0.948                              |
| PF3D7_0913400 | -0.802                                 | 0.64                               | 0.919                                  | 2.67                                       | 0.542                           | 0.924                              |
| PF3D7_1362700 | 1.38                                   | 0.568                              | 0.918                                  | -1.4                                       | 0.597                           | 0.936                              |
| PF3D7_1400400 | -2.41                                  | 0.406                              | 0.918                                  | 2.71                                       | 0.348                           | 0.919                              |
| PF3D7_1372400 | 2.99                                   | 0.438                              | 0.918                                  | -5.68                                      | 0.286                           | 0.919                              |
| PF3D7_0912100 | -2.01                                  | 0.462                              | 0.918                                  | 1.98                                       | 0.421                           | 0.919                              |
| PF3D7_0719700 | -0.784                                 | 0.192                              | 0.918                                  | 1.54                                       | 0.0458                          | 0.919                              |
| PF3D7_0108800 | 0.734                                  | 0.446                              | 0.918                                  | -2.22                                      | 0.156                           | 0.919                              |
| PF3D7_0532400 | -0.944                                 | 0.777                              | 0.943                                  | 0.521                                      | 0.872                           | 0.981                              |
| PF3D7_0819200 | -11.4                                  | 0.163                              | 0.918                                  | 15.4                                       | 0.0897                          | 0.919                              |
| PF3D7_1007500 | 1.56                                   | 0.679                              | 0.923                                  | -0.513                                     | 0.876                           | 0.981                              |
| PF3D7_1435700 | 0.261                                  | 0.647                              | 0.919                                  | -0.812                                     | 0.426                           | 0.919                              |
| PF3D7_1465000 | -0.0563                                | 0.985                              | 0.999                                  | 2.44                                       | 0.378                           | 0.919                              |
| PF3D7_1411500 | -3                                     | 0.591                              | 0.918                                  | 2.21                                       | 0.688                           | 0.954                              |
| PF3D7_1033700 | 0.181                                  | 0.965                              | 0.993                                  | 3.31                                       | 0.424                           | 0.919                              |
| PF3D7_1255100 | 4.65                                   | 0.241                              | 0.918                                  | -4.49                                      | 0.247                           | 0.919                              |
| PF3D7_0312500 | 0.951                                  | 0.368                              | 0.918                                  | 2.24                                       | 0.39                            | 0.919                              |
| PF3D7_0419000 | -9.59                                  | 0.231                              | 0.918                                  | 6.31                                       | 0.334                           | 0.919                              |
| PF3D7_1143900 | -5.16                                  | 0.129                              | 0.918                                  | 4.28                                       | 0.165                           | 0.919                              |
| PF3D7_1135500 | -1.25                                  | 0.652                              | 0.92                                   | 1.15                                       | 0.794                           | 0.965                              |

|               |         |        |       |         |        |       |
|---------------|---------|--------|-------|---------|--------|-------|
| PF3D7_1234700 | -0.0405 | 0.952  | 0.992 | -0.0934 | 0.888  | 0.982 |
| PF3D7_1009800 | -5.48   | 0.295  | 0.918 | 8.32    | 0.112  | 0.919 |
| PF3D7_1302900 | -0.0818 | 0.978  | 0.997 | 0.559   | 0.876  | 0.981 |
| PF3D7_0803400 | -0.145  | 0.711  | 0.933 | 0.217   | 0.675  | 0.954 |
| PF3D7_1433100 | 2.73    | 0.334  | 0.918 | -4.16   | 0.34   | 0.919 |
| PF3D7_0305100 | -0.999  | 0.711  | 0.933 | 2.26    | 0.424  | 0.919 |
| PF3D7_1426500 | -0.852  | 0.817  | 0.954 | 0.83    | 0.67   | 0.954 |
| PF3D7_1312700 | -5.58   | 0.283  | 0.918 | 8.61    | 0.138  | 0.919 |
| PF3D7_1430100 | -0.741  | 0.771  | 0.943 | 4.62    | 0.239  | 0.919 |
| PF3D7_1021300 | 1.27    | 0.809  | 0.953 | 1.33    | 0.818  | 0.968 |
| PF3D7_0627600 | -491    | 0.999  | 1     | -19.2   | 1      | 1     |
| PF3D7_1221400 | -4.35   | 0.195  | 0.918 | 5.94    | 0.0916 | 0.919 |
| PF3D7_1028900 | 25.8    | 0.0749 | 0.918 | 9.68    | 0.246  | 0.919 |
| PF3D7_0909700 | -0.18   | 0.745  | 0.94  | 0.719   | 0.351  | 0.919 |
| PF3D7_1318200 | 3.91    | 0.387  | 0.918 | 5.02    | 0.425  | 0.919 |
| PF3D7_1344800 | 0.675   | 0.704  | 0.932 | 2.07    | 0.405  | 0.919 |
| PF3D7_1244900 | 4.32    | 0.147  | 0.918 | -2.13   | 0.408  | 0.919 |
| PF3D7_1029400 | 6.1     | 0.314  | 0.918 | -6.5    | 0.315  | 0.919 |
| PF3D7_0611500 | -4.11   | 0.271  | 0.918 | 4.59    | 0.246  | 0.919 |
| PF3D7_0829200 | -3.3    | 0.289  | 0.918 | 5.06    | 0.14   | 0.919 |
| PF3D7_1012800 | -5.06   | 0.146  | 0.918 | 3.42    | 0.371  | 0.919 |
| PF3D7_0420300 | -0.0594 | 0.883  | 0.979 | -0.108  | 0.907  | 0.984 |
| PF3D7_1467600 | -0.193  | 0.88   | 0.978 | 0.553   | 0.778  | 0.963 |
| PF3D7_0717500 | 0.495   | 0.879  | 0.978 | -0.214  | 0.953  | 0.994 |
| PF3D7_1209300 | -1.15   | 0.68   | 0.923 | 1.35    | 0.707  | 0.954 |
| PF3D7_0902200 | 0.271   | 0.591  | 0.918 | 0.185   | 0.825  | 0.969 |
| PF3D7_0107600 | 0.899   | 0.887  | 0.979 | 2.53    | 0.607  | 0.939 |
| PF3D7_0931300 | -1.75   | 0.351  | 0.918 | 2.36    | 0.264  | 0.919 |
| PF3D7_0904000 | -1.89   | 0.138  | 0.918 | 3.27    | 0.25   | 0.919 |
| PF3D7_0710900 | 5.21    | 0.394  | 0.918 | -5.64   | 0.366  | 0.919 |
| PF3D7_0524600 | 2.63    | 0.503  | 0.918 | -1.45   | 0.688  | 0.954 |
| PF3D7_0221800 | 0.204   | 0.962  | 0.992 | -0.135  | 0.973  | 0.998 |
| PF3D7_0621900 | -0.384  | 0.689  | 0.927 | 2.01    | 0.311  | 0.919 |
| PF3D7_0221600 | -2.1    | 0.34   | 0.918 | 2.23    | 0.297  | 0.919 |
| PF3D7_1369500 | -1.36   | 0.652  | 0.92  | 2.33    | 0.507  | 0.924 |
| PF3D7_0923300 | -2.05   | 0.404  | 0.918 | 1.66    | 0.515  | 0.924 |
| PF3D7_0420200 | 4.7     | 0.35   | 0.918 | -4.56   | 0.362  | 0.919 |
| PF3D7_0811400 | -6.78   | 0.31   | 0.918 | 13.4    | 0.105  | 0.919 |
| PF3D7_0110700 | -0.336  | 0.915  | 0.984 | 1.98    | 0.581  | 0.933 |
| PF3D7_1004300 | 0.874   | 0.693  | 0.928 | -1.05   | 0.644  | 0.95  |
| PF3D7_1229600 | 6.26    | 0.291  | 0.918 | -6.05   | 0.307  | 0.919 |
| PF3D7_0913300 | -1.67   | 0.304  | 0.918 | 0.459   | 0.8    | 0.965 |
| PF3D7_0720000 | -0.135  | 0.972  | 0.995 | -0.602  | 0.891  | 0.982 |
| PF3D7_0931900 | -3.5    | 0.398  | 0.918 | 2.39    | 0.633  | 0.948 |
| PF3D7_0205100 | -1.76   | 0.534  | 0.918 | 1.82    | 0.627  | 0.945 |
| PF3D7_1209000 | -5.61   | 0.295  | 0.918 | 4.3     | 0.579  | 0.933 |

|               |         |        |       |        |        |       |
|---------------|---------|--------|-------|--------|--------|-------|
| PF3D7_1131100 | -4.23   | 0.185  | 0.918 | 4.1    | 0.191  | 0.919 |
| PF3D7_1464500 | -0.0597 | 0.899  | 0.98  | 0.428  | 0.547  | 0.924 |
| PF3D7_0403100 | 1.02    | 0.71   | 0.933 | -0.626 | 0.802  | 0.965 |
| PF3D7_1313900 | 3.68    | 0.326  | 0.918 | -2.82  | 0.423  | 0.919 |
| PF3D7_0714300 | -0.428  | 0.715  | 0.935 | 0.477  | 0.784  | 0.963 |
| PF3D7_1247200 | 0.0101  | 0.998  | 1     | -0.112 | 0.976  | 0.998 |
| PF3D7_0304300 | -0.347  | 0.887  | 0.979 | 0.076  | 0.98   | 0.998 |
| PF3D7_0900600 | -0.0643 | 0.952  | 0.992 | 0.329  | 0.894  | 0.982 |
| PF3D7_1420900 | -2.68   | 0.427  | 0.918 | 5.54   | 0.178  | 0.919 |
| PF3D7_0729900 | -2.14   | 0.244  | 0.918 | 4.81   | 0.191  | 0.919 |
| PF3D7_1117900 | -0.92   | 0.281  | 0.918 | 1.86   | 0.218  | 0.919 |
| PF3D7_0108400 | -1.81   | 0.502  | 0.918 | 4.83   | 0.271  | 0.919 |
| PF3D7_1463200 | -1.65   | 0.579  | 0.918 | 1.81   | 0.58   | 0.933 |
| PF3D7_0712800 | 1.78    | 0.483  | 0.918 | 0.687  | 0.765  | 0.962 |
| PF3D7_0909900 | 2.28    | 0.257  | 0.918 | -1.59  | 0.379  | 0.919 |
| PF3D7_1437500 | -6.98   | 0.0868 | 0.918 | 8.02   | 0.0471 | 0.919 |
| PF3D7_0813000 | -0.895  | 0.736  | 0.937 | -0.678 | 0.816  | 0.968 |
| PF10_0125     | 1.97    | 0.403  | 0.918 | -1.09  | 0.792  | 0.965 |
| PF3D7_0308000 | -0.0487 | 0.905  | 0.98  | 0.756  | 0.364  | 0.919 |
| PF3D7_1240900 | 0.269   | 0.616  | 0.919 | 0.335  | 0.685  | 0.954 |
| PF3D7_0302500 | -1.43   | 0.259  | 0.918 | 1.6    | 0.179  | 0.919 |
| PF3D7_1031700 | -1.5    | 0.495  | 0.918 | -0.628 | 0.867  | 0.981 |
| PF3D7_1328500 | -3.37   | 0.148  | 0.918 | 3.71   | 0.118  | 0.919 |
| PF3D7_0707700 | 0.0276  | 0.99   | 0.999 | 0.681  | 0.656  | 0.95  |
| PF3D7_0102800 | 1.07    | 0.72   | 0.937 | 2.98   | 0.455  | 0.919 |
| PF3D7_0900900 | 6.64    | 0.086  | 0.918 | -0.787 | 0.744  | 0.958 |
| PF3D7_1113400 | -1.2    | 0.668  | 0.923 | 1.14   | 0.638  | 0.95  |
| PF3D7_1020900 | -1      | 0.798  | 0.953 | 2.61   | 0.474  | 0.919 |
| PF3D7_1413100 | 8.28    | 0.162  | 0.918 | -8.16  | 0.143  | 0.919 |
| PF3D7_0823200 | 7.14    | 0.115  | 0.918 | -6     | 0.117  | 0.919 |
| PF3D7_0217000 | -4.11   | 0.351  | 0.918 | 3.51   | 0.367  | 0.919 |
| PF3D7_0627300 | 1.53    | 0.501  | 0.918 | -0.804 | 0.72   | 0.957 |
| PF3D7_0623500 | -7.81   | 0.316  | 0.918 | 8.92   | 0.315  | 0.919 |
| PF3D7_1447700 | 9.35    | 0.0914 | 0.918 | -9.07  | 0.0633 | 0.919 |
| PF3D7_1030800 | -3.56   | 0.35   | 0.918 | 4.65   | 0.272  | 0.919 |
| PF3D7_1112500 | -4.51   | 0.108  | 0.918 | 0.731  | 0.731  | 0.957 |
| PF3D7_1304000 | -0.781  | 0.351  | 0.918 | 1.38   | 0.332  | 0.919 |
| PF3D7_0322500 | -0.906  | 0.645  | 0.919 | 2.09   | 0.477  | 0.919 |
| PF3D7_1247900 | 2.3     | 0.554  | 0.918 | -5.44  | 0.337  | 0.919 |
| PF3D7_0918200 | -3.29   | 0.531  | 0.918 | 4.7    | 0.426  | 0.919 |
| PF3D7_1304500 | 1.98    | 0.341  | 0.918 | -0.966 | 0.682  | 0.954 |
| PF3D7_0509900 | -1.76   | 0.54   | 0.918 | 3.12   | 0.287  | 0.919 |
| PF3D7_1352800 | -2.4    | 0.184  | 0.918 | 3.65   | 0.132  | 0.919 |
| PF3D7_0614200 | -0.767  | 0.788  | 0.948 | -0.802 | 0.809  | 0.967 |
| PF3D7_0108300 | -0.0592 | 0.88   | 0.978 | 0.847  | 0.212  | 0.919 |
| PF08_0013     | -5.56   | 0.205  | 0.918 | 17.6   | 0.0268 | 0.919 |
| PF3D7_1421000 | -0.179  | 0.96   | 0.992 | 0.142  | 0.977  | 0.998 |

|               |        |        |       |           |        |       |
|---------------|--------|--------|-------|-----------|--------|-------|
| PF3D7_0512300 | -1.75  | 0.53   | 0.918 | 3.27      | 0.42   | 0.919 |
| PF3D7_1409400 | 1.45   | 0.68   | 0.923 | -0.000651 | 1      | 1     |
| PF3D7_1408700 | -0.302 | 0.619  | 0.919 | 0.944     | 0.297  | 0.919 |
| PF3D7_0402100 | -0.88  | 0.812  | 0.953 | 2.64      | 0.584  | 0.933 |
| PF3D7_0717700 | 0.498  | 0.841  | 0.962 | 3.89      | 0.254  | 0.919 |
| PF3D7_1306200 | 6.18   | 0.374  | 0.918 | -2.54     | 0.68   | 0.954 |
| PF3D7_1238800 | 0.092  | 0.958  | 0.992 | 0.162     | 0.925  | 0.989 |
| PF3D7_1211400 | -2.48  | 0.442  | 0.918 | 2.16      | 0.643  | 0.95  |
| PF3D7_0216700 | 0.329  | 0.904  | 0.98  | 0.308     | 0.907  | 0.984 |
| PF3D7_1368000 | 0.402  | 0.863  | 0.971 | -1.08     | 0.82   | 0.968 |
| PF3D7_1121900 | -1.55  | 0.628  | 0.919 | -0.399    | 0.921  | 0.989 |
| PF3D7_1343400 | 0.486  | 0.667  | 0.923 | -0.481    | 0.728  | 0.957 |
| PF3D7_1138300 | 1.68   | 0.664  | 0.922 | -5.18     | 0.264  | 0.919 |
| PF3D7_0833400 | 5.33   | 0.234  | 0.918 | 7.99      | 0.201  | 0.919 |
| PF3D7_0516000 | -0.755 | 0.569  | 0.918 | 0.972     | 0.547  | 0.924 |
| PF3D7_1370300 | -1.89  | 0.62   | 0.919 | 6.39      | 0.134  | 0.919 |
| PF3D7_0422700 | -1.04  | 0.792  | 0.949 | 1.89      | 0.716  | 0.957 |
| PF3D7_0905100 | 2.92   | 0.291  | 0.918 | -2.54     | 0.32   | 0.919 |
| PF3D7_0301200 | 3.61   | 0.234  | 0.918 | -3.52     | 0.247  | 0.919 |
| PF3D7_0105300 | 0.207  | 0.892  | 0.98  | -1.05     | 0.571  | 0.931 |
| PF3D7_0304200 | 1.87   | 0.465  | 0.918 | 0.172     | 0.954  | 0.994 |
| PF3D7_1331500 | -3.55  | 0.238  | 0.918 | 1.06      | 0.714  | 0.957 |
| PF3D7_1430700 | -1.04  | 0.606  | 0.918 | 2.06      | 0.328  | 0.919 |
| PF3D7_0915000 | -2.15  | 0.657  | 0.921 | 2.34      | 0.566  | 0.931 |
| PF3D7_0625000 | -1.93  | 0.417  | 0.918 | 2.2       | 0.356  | 0.919 |
| PF3D7_0202200 | 7.68   | 0.204  | 0.918 | -12.5     | 0.058  | 0.919 |
| PFD0175c      | 3.87   | 0.204  | 0.918 | 0.996     | 0.649  | 0.95  |
| PF3D7_1204200 | -2.39  | 0.38   | 0.918 | -2.12     | 0.469  | 0.919 |
| PF3D7_0223400 | -1.09  | 0.658  | 0.921 | 1.81      | 0.443  | 0.919 |
| PF3D7_0606900 | -1.68  | 0.731  | 0.937 | 4.57      | 0.346  | 0.919 |
| PF3D7_1125400 | -0.385 | 0.425  | 0.918 | 2.2       | 0.219  | 0.919 |
| PF3D7_1138000 | 0.951  | 0.679  | 0.923 | -3.04     | 0.232  | 0.919 |
| PF3D7_0308700 | 0.381  | 0.657  | 0.921 | -0.322    | 0.762  | 0.962 |
| PF3D7_1040100 | 1.47   | 0.257  | 0.918 | -1.06     | 0.428  | 0.919 |
| PF3D7_1458600 | 3.85   | 0.119  | 0.918 | -1.17     | 0.488  | 0.921 |
| PF3D7_1320800 | 0.614  | 0.466  | 0.918 | -0.375    | 0.679  | 0.954 |
| PF3D7_1438900 | -2.39  | 0.525  | 0.918 | 3.14      | 0.283  | 0.919 |
| PF3D7_1250100 | -2.68  | 0.563  | 0.918 | 7.35      | 0.0895 | 0.919 |
| PFC10_API0036 | -0.255 | 0.975  | 0.996 | -5.49     | 0.269  | 0.919 |
| PF3D7_0921700 | -2.76  | 0.59   | 0.918 | 7.69      | 0.264  | 0.919 |
| PF3D7_1414700 | 12.7   | 0.0542 | 0.918 | -11.5     | 0.0689 | 0.919 |
| PF3D7_1425600 | -0.821 | 0.81   | 0.953 | 1.65      | 0.597  | 0.936 |
| PF3D7_0314100 | -1.65  | 0.574  | 0.918 | 1.19      | 0.829  | 0.971 |
| PF3D7_0904100 | 4.89   | 0.332  | 0.918 | -6.03     | 0.277  | 0.919 |
| PF3D7_0922700 | 0.888  | 0.703  | 0.931 | -3.72     | 0.387  | 0.919 |
| PF3D7_0108100 | 2.86   | 0.497  | 0.918 | -2.33     | 0.678  | 0.954 |
| PF3D7_1448300 | 1.27   | 0.455  | 0.918 | -0.398    | 0.819  | 0.968 |

|               |        |        |       |        |        |       |
|---------------|--------|--------|-------|--------|--------|-------|
| PF3D7_0524100 | -2.45  | 0.186  | 0.918 | 4.9    | 0.0965 | 0.919 |
| PF3D7_0112000 | 0.78   | 0.77   | 0.943 | 4.1    | 0.198  | 0.919 |
| PF3D7_1332600 | 2.92   | 0.285  | 0.918 | -0.844 | 0.8    | 0.965 |
| PF3D7_1449700 | 4      | 0.249  | 0.918 | -5.68  | 0.223  | 0.919 |
| PF3D7_1339000 | -2.22  | 0.599  | 0.918 | 0.925  | 0.741  | 0.958 |
| PF3D7_1427700 | -6.23  | 0.449  | 0.918 | 6.26   | 0.384  | 0.919 |
| PF3D7_1454000 | -1.42  | 0.728  | 0.937 | 23.4   | 0.0612 | 0.919 |
| PF3D7_1213700 | -2.27  | 0.582  | 0.918 | -1.8   | 0.745  | 0.958 |
| PF3D7_1339300 | 0.799  | 0.578  | 0.918 | -2.31  | 0.468  | 0.919 |
| PF3D7_1432400 | 1.64   | 0.11   | 0.918 | 0.694  | 0.612  | 0.942 |
| PF3D7_1224400 | -0.268 | 0.943  | 0.989 | -1.1   | 0.807  | 0.967 |
| PF3D7_0715300 | 0.373  | 0.901  | 0.98  | 1.86   | 0.586  | 0.933 |
| PF3D7_1201400 | 0.775  | 0.462  | 0.918 | -0.292 | 0.792  | 0.965 |
| PF3D7_1330100 | 12.3   | 0.267  | 0.918 | -1.29  | 0.818  | 0.968 |
| PF3D7_0321400 | 4.11   | 0.267  | 0.918 | -2.9   | 0.446  | 0.919 |
| PF3D7_1120900 | 0.694  | 0.77   | 0.943 | -1.02  | 0.653  | 0.95  |
| PF3D7_1230700 | 0.425  | 0.833  | 0.96  | 0.106  | 0.946  | 0.994 |
| PF3D7_1224500 | -0.904 | 0.448  | 0.918 | 1.06   | 0.438  | 0.919 |
| PF3D7_0724000 | 0.977  | 0.599  | 0.918 | 8.99   | 0.194  | 0.919 |
| PF3D7_0714100 | -3.7   | 0.371  | 0.918 | 3.07   | 0.449  | 0.919 |
| PF3D7_0306800 | -8.78  | 0.108  | 0.918 | 2.95   | 0.317  | 0.919 |
| PF3D7_1322800 | -4.17  | 0.465  | 0.918 | 3.41   | 0.568  | 0.931 |
| PF3D7_1001100 | -6.77  | 0.133  | 0.918 | 7.59   | 0.126  | 0.919 |
| PF3D7_1245800 | 0.841  | 0.892  | 0.98  | -1.81  | 0.789  | 0.964 |
| PF3D7_1244600 | 0.293  | 0.67   | 0.923 | 0.634  | 0.406  | 0.919 |
| PF3D7_0411000 | -0.755 | 0.571  | 0.918 | 0.542  | 0.705  | 0.954 |
| PF3D7_0306600 | -0.279 | 0.944  | 0.99  | 0.628  | 0.874  | 0.981 |
| PF3D7_0713800 | 2.22   | 0.503  | 0.918 | -5.1   | 0.395  | 0.919 |
| PF3D7_1341900 | -5.78  | 0.0969 | 0.918 | 17.3   | 0.0736 | 0.919 |
| PF3D7_1146000 | -2.02  | 0.368  | 0.918 | 2.55   | 0.199  | 0.919 |
| PF3D7_1474700 | -0.785 | 0.774  | 0.943 | -0.202 | 0.952  | 0.994 |
| PF3D7_1037100 | 3.42   | 0.477  | 0.918 | -0.951 | 0.832  | 0.972 |
| PF3D7_1438000 | -0.668 | 0.272  | 0.918 | -0.134 | 0.871  | 0.981 |
| PF3D7_0937400 | 0.959  | 0.438  | 0.918 | -0.5   | 0.696  | 0.954 |
| PF3D7_0824200 | 3.42   | 0.208  | 0.918 | -1.95  | 0.413  | 0.919 |
| PF3D7_1441100 | -3.17  | 0.518  | 0.918 | -4     | 0.598  | 0.936 |
| PF3D7_1147200 | 1.82   | 0.392  | 0.918 | -1.62  | 0.453  | 0.919 |
| PF3D7_0832800 | -0.198 | 0.829  | 0.959 | 2.21   | 0.181  | 0.919 |
| PF3D7_0831000 | -5.01  | 0.0927 | 0.918 | 3.51   | 0.226  | 0.919 |
| PF3D7_0807100 | 0.862  | 0.503  | 0.918 | 0.777  | 0.578  | 0.933 |
| PF11_0139     | -3.65  | 0.408  | 0.918 | 8.72   | 0.0589 | 0.919 |
| PF3D7_1346900 | -3.59  | 0.129  | 0.918 | 3.85   | 0.167  | 0.919 |
| PF3D7_1439400 | -4.01  | 0.0801 | 0.918 | 3.37   | 0.311  | 0.919 |
| PF3D7_0612600 | -1.48  | 0.221  | 0.918 | 1.12   | 0.355  | 0.919 |
| PF3D7_0720600 | -6.91  | 0.301  | 0.918 | 4.94   | 0.562  | 0.928 |
| PF3D7_1022000 | -0.224 | 0.87   | 0.974 | -0.423 | 0.763  | 0.962 |
| PF3D7_1223800 | 3.91   | 0.22   | 0.918 | -1.91  | 0.501  | 0.924 |

|               |         |        |       |        |        |       |
|---------------|---------|--------|-------|--------|--------|-------|
| PF3D7_1359500 | -1.76   | 0.485  | 0.918 | 3.01   | 0.457  | 0.919 |
| PF3D7_0413300 | 0.508   | 0.516  | 0.918 | 1.57   | 0.21   | 0.919 |
| PF3D7_1368500 | 1.23    | 0.533  | 0.918 | 0.118  | 0.93   | 0.991 |
| PF3D7_0515600 | -2.42   | 0.271  | 0.918 | 1.77   | 0.697  | 0.954 |
| PF3D7_1208800 | -1.08   | 0.302  | 0.918 | 0.854  | 0.702  | 0.954 |
| PF3D7_1123300 | -0.0412 | 0.988  | 0.999 | -2.53  | 0.492  | 0.921 |
| PF3D7_1038400 | -0.337  | 0.756  | 0.941 | 4.69   | 0.168  | 0.919 |
| PF3D7_0527600 | -0.412  | 0.807  | 0.953 | 0.63   | 0.739  | 0.958 |
| PF3D7_1218000 | 2.2     | 0.668  | 0.923 | 3.09   | 0.488  | 0.921 |
| PF3D7_0513000 | -9.98   | 0.0705 | 0.918 | 7.62   | 0.114  | 0.919 |
| PF3D7_1019500 | 3.98    | 0.557  | 0.918 | 0.277  | 0.964  | 0.996 |
| PF3D7_1020800 | -0.518  | 0.689  | 0.927 | 1.21   | 0.373  | 0.919 |
| PF3D7_0913700 | -5.77   | 0.182  | 0.918 | 16.2   | 0.0708 | 0.919 |
| PF3D7_0719400 | 3.39    | 0.271  | 0.918 | -1.98  | 0.51   | 0.924 |
| PF3D7_0214200 | -1.78   | 0.633  | 0.919 | 3.62   | 0.44   | 0.919 |
| PF3D7_1310900 | -6.81   | 0.322  | 0.918 | 5.57   | 0.416  | 0.919 |
| PF3D7_0805600 | 4.97    | 0.293  | 0.918 | 0.494  | 0.924  | 0.989 |
| PF3D7_0201100 | 3.6     | 0.598  | 0.918 | -4.1   | 0.537  | 0.924 |
| PF3D7_1219800 | 1.05    | 0.651  | 0.92  | 1.82   | 0.507  | 0.924 |
| PF11_0313     | -0.221  | 0.91   | 0.983 | 1.45   | 0.411  | 0.919 |
| PF3D7_0309000 | -0.967  | 0.357  | 0.918 | 0.604  | 0.564  | 0.93  |
| PF3D7_1417600 | -1.03   | 0.238  | 0.918 | 0.995  | 0.432  | 0.919 |
| PF3D7_0422000 | -0.328  | 0.958  | 0.992 | 3.62   | 0.377  | 0.919 |
| PF3D7_1235500 | 3.12    | 0.377  | 0.918 | 0.138  | 0.972  | 0.998 |
| PF3D7_0208300 | 3.65    | 0.459  | 0.918 | -4.7   | 0.335  | 0.919 |
| PF3D7_1348300 | 0.514   | 0.639  | 0.919 | 1.78   | 0.554  | 0.926 |
| PFE1590w      | -1.23   | 0.27   | 0.918 | 2.3    | 0.144  | 0.919 |
| PF3D7_0804300 | -0.439  | 0.908  | 0.981 | -2.3   | 0.517  | 0.924 |
| PF3D7_0616500 | -5.45   | 0.201  | 0.918 | 8.25   | 0.227  | 0.919 |
| PF3D7_0621000 | 3.34    | 0.455  | 0.918 | -5.32  | 0.222  | 0.919 |
| PF3D7_0318300 | -0.714  | 0.382  | 0.918 | 2.94   | 0.159  | 0.919 |
| PF3D7_1438500 | 1       | 0.727  | 0.937 | -0.588 | 0.893  | 0.982 |
| PF3D7_0220700 | -3.42   | 0.225  | 0.918 | 2.96   | 0.295  | 0.919 |
| PF3D7_0607700 | 1.88    | 0.325  | 0.918 | -1.67  | 0.438  | 0.919 |
| PF3D7_1365300 | -0.612  | 0.381  | 0.918 | 0.173  | 0.87   | 0.981 |
| PF3D7_1427300 | 0.497   | 0.62   | 0.919 | 1.01   | 0.392  | 0.919 |
| PF3D7_1149200 | -5.37   | 0.141  | 0.918 | 4.81   | 0.171  | 0.919 |
| PF3D7_1203500 | 1.26    | 0.627  | 0.919 | -2.22  | 0.466  | 0.919 |
| PF3D7_0518600 | -1.16   | 0.397  | 0.918 | 2.89   | 0.187  | 0.919 |
| PF3D7_0614700 | -0.0147 | 0.968  | 0.994 | 0.637  | 0.477  | 0.919 |
| PF3D7_0514300 | 1.19    | 0.25   | 0.918 | 1.02   | 0.516  | 0.924 |
| PF3D7_0300100 | 0.583   | 0.238  | 0.918 | -1.39  | 0.14   | 0.919 |
| PF3D7_0908700 | 0.365   | 0.71   | 0.933 | -0.519 | 0.731  | 0.957 |
| PFD0711c      | -29000  | 0.986  | 0.999 | 63100  | 0.988  | 0.998 |
| PF3D7_1360500 | -3.37   | 0.335  | 0.918 | 7.55   | 0.156  | 0.919 |
| PF3D7_1468500 | 0.783   | 0.583  | 0.918 | 0.597  | 0.857  | 0.978 |
| PF3D7_1333700 | -2.89   | 0.509  | 0.918 | 1.48   | 0.782  | 0.963 |

|               |        |        |       |         |        |       |
|---------------|--------|--------|-------|---------|--------|-------|
| PF3D7_0408000 | -4.06  | 0.473  | 0.918 | 3.57    | 0.458  | 0.919 |
| PF3D7_0708900 | -0.374 | 0.921  | 0.985 | -1.27   | 0.739  | 0.958 |
| PF3D7_1352100 | 0.399  | 0.825  | 0.958 | -0.727  | 0.705  | 0.954 |
| PF3D7_1031200 | 1.71   | 0.502  | 0.918 | -1.84   | 0.5    | 0.924 |
| PF3D7_0718700 | -10.7  | 0.0753 | 0.918 | 7.15    | 0.0678 | 0.919 |
| PF3D7_0707500 | -0.498 | 0.55   | 0.918 | 0.803   | 0.456  | 0.919 |
| PFI0645w      | -1.45  | 0.528  | 0.918 | 1.97    | 0.65   | 0.95  |
| PF3D7_0820700 | 5.43   | 0.316  | 0.918 | -4.07   | 0.395  | 0.919 |
| PF3D7_0934400 | -3.45  | 0.536  | 0.918 | 3.5     | 0.518  | 0.924 |
| PF3D7_1003400 | -0.178 | 0.674  | 0.923 | 0.299   | 0.723  | 0.957 |
| PF3D7_1430300 | 1.21   | 0.566  | 0.918 | -1.07   | 0.614  | 0.942 |
| PF13_0197     | 0.476  | 0.828  | 0.959 | 0.843   | 0.733  | 0.957 |
| PF3D7_1347500 | 0.246  | 0.902  | 0.98  | 0.274   | 0.896  | 0.982 |
| PF3D7_1014700 | -3.41  | 0.459  | 0.918 | 2.46    | 0.589  | 0.935 |
| PF3D7_1115000 | 4.44   | 0.363  | 0.918 | -6.03   | 0.355  | 0.919 |
| PF3D7_1459100 | -0.193 | 0.769  | 0.942 | 0.639   | 0.423  | 0.919 |
| PF3D7_1422100 | -1.43  | 0.461  | 0.918 | -4.35   | 0.422  | 0.919 |
| PF3D7_0816200 | -1.42  | 0.525  | 0.918 | 2.43    | 0.338  | 0.919 |
| PF3D7_1122800 | -0.606 | 0.581  | 0.918 | 2.61    | 0.208  | 0.919 |
| PF3D7_1432900 | 0.34   | 0.476  | 0.918 | 4.02    | 0.148  | 0.919 |
| PF3D7_0218500 | -7.49  | 0.193  | 0.918 | 5.84    | 0.241  | 0.919 |
| PF3D7_0825600 | -1.8   | 0.42   | 0.918 | 3.05    | 0.479  | 0.92  |
| PF3D7_0113000 | -6.89  | 0.267  | 0.918 | 3.11    | 0.538  | 0.924 |
| PF3D7_0113300 | 1.73   | 0.512  | 0.918 | -0.0102 | 0.997  | 1     |
| PF3D7_0418800 | 3.1    | 0.443  | 0.918 | -2.09   | 0.623  | 0.942 |
| PF3D7_1022800 | -3.56  | 0.366  | 0.918 | 2.62    | 0.459  | 0.919 |
| PF3D7_0321100 | -1.44  | 0.452  | 0.918 | -1.78   | 0.599  | 0.936 |
| PF3D7_0110600 | -0.11  | 0.954  | 0.992 | -0.0881 | 0.948  | 0.994 |
| PF3D7_0523600 | -1.18  | 0.444  | 0.918 | -1.7    | 0.566  | 0.931 |
| PF3D7_0803300 | 1.22   | 0.741  | 0.938 | -1.55   | 0.702  | 0.954 |
| PF3D7_1102200 | 0.356  | 0.8    | 0.953 | -0.45   | 0.718  | 0.957 |
| PF3D7_0625600 | -4.77  | 0.278  | 0.918 | 5.32    | 0.237  | 0.919 |
| PF3D7_0800600 | 5.05   | 0.196  | 0.918 | -7.2    | 0.0936 | 0.919 |
| PF3D7_1353700 | -1.08  | 0.468  | 0.918 | 1.33    | 0.364  | 0.919 |
| PF3D7_1359200 | 0.921  | 0.711  | 0.933 | 0.159   | 0.97   | 0.998 |
| PF3D7_1302600 | -0.135 | 0.753  | 0.94  | 0.203   | 0.873  | 0.981 |
| PF3D7_0409100 | -6.51  | 0.139  | 0.918 | 4.74    | 0.15   | 0.919 |
| PF08_0035     | -1.48  | 0.553  | 0.918 | 1.44    | 0.58   | 0.933 |
| PF3D7_1114600 | -2.95  | 0.446  | 0.918 | -2.71   | 0.512  | 0.924 |
| PF3D7_1325000 | 1.01   | 0.601  | 0.918 | 0.761   | 0.845  | 0.975 |
| PF3D7_1136200 | -1.47  | 0.555  | 0.918 | 11.6    | 0.112  | 0.919 |
| PF3D7_1113300 | 0.945  | 0.843  | 0.963 | 4.62    | 0.397  | 0.919 |
| PF3D7_1203900 | 5.55   | 0.152  | 0.918 | -2.82   | 0.203  | 0.919 |
| PF3D7_1409000 | -0.662 | 0.838  | 0.961 | 4.36    | 0.329  | 0.919 |
| PF3D7_1468300 | -13.7  | 0.0749 | 0.918 | 13.1    | 0.0759 | 0.919 |
| PF13_0285     | 3.53   | 0.234  | 0.918 | -2.27   | 0.448  | 0.919 |
| PF3D7_0519100 | 0.677  | 0.756  | 0.941 | -1.31   | 0.685  | 0.954 |

|               |         |        |       |        |        |       |
|---------------|---------|--------|-------|--------|--------|-------|
| PF3D7_1231400 | 1.11    | 0.517  | 0.918 | 1.45   | 0.59   | 0.935 |
| PF3D7_0802800 | 2.64    | 0.433  | 0.918 | -1.52  | 0.642  | 0.95  |
| PF3D7_1231600 | -4.22   | 0.219  | 0.918 | 4.01   | 0.231  | 0.919 |
| PF3D7_1344100 | -8.18   | 0.096  | 0.918 | 8.2    | 0.0733 | 0.919 |
| PF3D7_0529700 | -0.709  | 0.642  | 0.919 | 0.653  | 0.641  | 0.95  |
| PF3D7_1367200 | 13.9    | 0.0884 | 0.918 | -6.6   | 0.107  | 0.919 |
| PF3D7_1128400 | -1.44   | 0.641  | 0.919 | -5.03  | 0.349  | 0.919 |
| PF3D7_1118100 | 0.725   | 0.912  | 0.983 | -0.772 | 0.918  | 0.988 |
| PF3D7_1405200 | -1.38   | 0.665  | 0.923 | 1.79   | 0.585  | 0.933 |
| PF3D7_1458800 | -4.02   | 0.197  | 0.918 | 1.53   | 0.703  | 0.954 |
| PF3D7_0415100 | -3.53   | 0.314  | 0.918 | 3.71   | 0.289  | 0.919 |
| PF3D7_1360300 | -6.37   | 0.259  | 0.918 | 7.99   | 0.158  | 0.919 |
| PF3D7_1440500 | -1.07   | 0.518  | 0.918 | 1.03   | 0.385  | 0.919 |
| PF3D7_0913600 | -1.45   | 0.71   | 0.933 | 1.67   | 0.685  | 0.954 |
| PF3D7_1425700 | -1.24   | 0.588  | 0.918 | 1.84   | 0.442  | 0.919 |
| PF3D7_0711100 | 1       | 0.438  | 0.918 | -0.425 | 0.766  | 0.962 |
| PF3D7_1345600 | -0.15   | 0.918  | 0.984 | 3.14   | 0.303  | 0.919 |
| PF3D7_0220100 | -3.33   | 0.316  | 0.918 | 3.19   | 0.334  | 0.919 |
| PF3D7_0532500 | -0.801  | 0.347  | 0.918 | -0.586 | 0.418  | 0.919 |
| PF3D7_0400300 | 2       | 0.403  | 0.918 | -1.58  | 0.462  | 0.919 |
| PF3D7_0928800 | 0.0944  | 0.886  | 0.979 | -0.547 | 0.683  | 0.954 |
| PF3D7_0902800 | 1.09    | 0.58   | 0.918 | 0.0057 | 0.998  | 1     |
| PF3D7_0926800 | 1.87    | 0.257  | 0.918 | 0.298  | 0.878  | 0.981 |
| PF3D7_1470500 | 0.291   | 0.607  | 0.918 | 0.622  | 0.504  | 0.924 |
| PF3D7_1233200 | -0.0656 | 0.84   | 0.962 | 0.737  | 0.379  | 0.919 |
| PF3D7_1471600 | -10.5   | 0.151  | 0.918 | 10.9   | 0.129  | 0.919 |
| PF3D7_1235700 | 1.41    | 0.744  | 0.94  | -0.6   | 0.867  | 0.981 |
| PF3D7_1409800 | 0.0827  | 0.866  | 0.972 | -0.517 | 0.598  | 0.936 |
| PF3D7_1215700 | 2.86    | 0.409  | 0.918 | -2.5   | 0.537  | 0.924 |
| PF3D7_0716000 | 3.2     | 0.401  | 0.918 | -3.04  | 0.607  | 0.939 |
| PF3D7_1139600 | 0.522   | 0.81   | 0.953 | -0.853 | 0.737  | 0.957 |
| PF3D7_1239300 | -0.656  | 0.409  | 0.918 | 1.38   | 0.611  | 0.942 |
| PF3D7_0627100 | 0.632   | 0.451  | 0.918 | -1.09  | 0.497  | 0.922 |
| PF3D7_1132700 | -9.94   | 0.145  | 0.918 | 9.57   | 0.154  | 0.919 |
| PF3D7_1343600 | 0.0417  | 0.945  | 0.99  | 0.18   | 0.904  | 0.984 |
| PF3D7_0514100 | 2       | 0.426  | 0.918 | -1.75  | 0.452  | 0.919 |
| PF3D7_1365100 | -0.842  | 0.759  | 0.941 | 9.07   | 0.171  | 0.919 |
| PF3D7_1004400 | -5.07   | 0.278  | 0.918 | 7.08   | 0.209  | 0.919 |
| PF3D7_1470700 | -2.98   | 0.478  | 0.918 | 2.5    | 0.538  | 0.924 |
| PF3D7_1016600 | 1.35    | 0.29   | 0.918 | 2.05   | 0.345  | 0.919 |
| PF3D7_0711300 | -1.24   | 0.532  | 0.918 | 2.09   | 0.44   | 0.919 |
| PF3D7_1216300 | -1.65   | 0.183  | 0.918 | 1.64   | 0.336  | 0.919 |
| PF3D7_0719100 | -0.457  | 0.938  | 0.989 | 2.58   | 0.497  | 0.922 |
| PF3D7_0219500 | -2.52   | 0.451  | 0.918 | 0.907  | 0.853  | 0.977 |
| PF3D7_0809700 | 2.36    | 0.599  | 0.918 | -0.759 | 0.846  | 0.975 |
| PFD0880w      | 0.521   | 0.835  | 0.961 | 1.01   | 0.721  | 0.957 |
| PF3D7_0515100 | 16.8    | 0.0731 | 0.918 | -12.5  | 0.0791 | 0.919 |



|               |        |        |       |         |        |       |
|---------------|--------|--------|-------|---------|--------|-------|
| PF3D7_1350400 | 1.29   | 0.446  | 0.918 | 0.89    | 0.775  | 0.963 |
| PF3D7_0403200 | 2.76   | 0.505  | 0.918 | -3.64   | 0.363  | 0.919 |
| PF3D7_0308300 | -3.77  | 0.398  | 0.918 | 10.8    | 0.0817 | 0.919 |
| PF3D7_0914200 | 3.93   | 0.286  | 0.918 | -2.83   | 0.544  | 0.924 |
| PF3D7_1207200 | -1.66  | 0.257  | 0.918 | 4.98    | 0.142  | 0.919 |
| PF3D7_1337800 | -5.13  | 0.402  | 0.918 | 7.45    | 0.126  | 0.919 |
| PF3D7_0101900 | 0.229  | 0.83   | 0.959 | 0.231   | 0.852  | 0.977 |
| PF3D7_0720700 | 0.458  | 0.822  | 0.956 | 0.743   | 0.752  | 0.961 |
| PF3D7_0525300 | 0.963  | 0.598  | 0.918 | 0.466   | 0.81   | 0.968 |
| PF3D7_0822400 | -3.51  | 0.415  | 0.918 | 0.0306  | 0.995  | 0.999 |
| PF3D7_1226400 | 1.26   | 0.473  | 0.918 | 3.32    | 0.306  | 0.919 |
| PF3D7_0804800 | -1.39  | 0.517  | 0.918 | 2.45    | 0.272  | 0.919 |
| PF3D7_0728100 | -3.45  | 0.2    | 0.918 | 4.84    | 0.15   | 0.919 |
| PF3D7_0315300 | 4.74   | 0.178  | 0.918 | -3.15   | 0.409  | 0.919 |
| PF3D7_1040400 | 1.34   | 0.269  | 0.918 | 0.0387  | 0.966  | 0.997 |
| PF3D7_0715100 | 0.966  | 0.608  | 0.918 | 0.707   | 0.777  | 0.963 |
| PF3D7_1102900 | 3.82   | 0.32   | 0.918 | -3.32   | 0.433  | 0.919 |
| PF3D7_1458500 | 2.47   | 0.246  | 0.918 | -2.43   | 0.25   | 0.919 |
| PF3D7_0319000 | 0.878  | 0.352  | 0.918 | -0.487  | 0.614  | 0.942 |
| PF3D7_1340900 | 0.432  | 0.588  | 0.918 | 0.335   | 0.746  | 0.959 |
| PF3D7_0600500 | -1.11  | 0.539  | 0.918 | 0.878   | 0.63   | 0.946 |
| PF3D7_1417700 | 4.32   | 0.236  | 0.918 | -8.9    | 0.128  | 0.919 |
| PF3D7_1311400 | 3.32   | 0.153  | 0.918 | 0.361   | 0.852  | 0.977 |
| PF3D7_1211000 | 0.81   | 0.639  | 0.919 | -0.213  | 0.904  | 0.984 |
| PF3D7_1111900 | 1.56   | 0.55   | 0.918 | -1.56   | 0.554  | 0.926 |
| PF3D7_0709400 | -1.42  | 0.242  | 0.918 | 1.72    | 0.266  | 0.919 |
| PF3D7_0526900 | 2.42   | 0.427  | 0.918 | -0.53   | 0.842  | 0.975 |
| PF3D7_0812500 | -12.3  | 0.0384 | 0.918 | 8.25    | 0.0404 | 0.919 |
| PF3D7_1476500 | -4.04  | 0.0957 | 0.918 | 3.99    | 0.0473 | 0.919 |
| PF3D7_1015300 | -1.05  | 0.543  | 0.918 | 0.704   | 0.707  | 0.954 |
| PF3D7_0202400 | -8.94  | 0.177  | 0.918 | 8.14    | 0.126  | 0.919 |
| PF3D7_0510100 | 0.454  | 0.413  | 0.918 | 0.0302  | 0.956  | 0.994 |
| PF3D7_1356700 | -0.615 | 0.846  | 0.963 | 4.45    | 0.57   | 0.931 |
| PF3D7_0930100 | -0.991 | 0.657  | 0.921 | 2.51    | 0.391  | 0.919 |
| PF3D7_0109900 | 3.47   | 0.346  | 0.918 | -0.375  | 0.938  | 0.994 |
| PF3D7_1226500 | 4.27   | 0.297  | 0.918 | -4.16   | 0.302  | 0.919 |
| PF3D7_1450000 | -2.16  | 0.52   | 0.918 | 1.9     | 0.602  | 0.937 |
| PF3D7_0319600 | -0.358 | 0.927  | 0.986 | -0.265  | 0.955  | 0.994 |
| PF3D7_0524500 | -5.79  | 0.0744 | 0.918 | -0.0858 | 0.981  | 0.998 |
| PF3D7_1209700 | 2.97   | 0.328  | 0.918 | -11.3   | 0.186  | 0.919 |
| PF3D7_1456200 | 0.243  | 0.94   | 0.989 | -1.62   | 0.612  | 0.942 |
| PF3D7_1462800 | -1.99  | 0.632  | 0.919 | 3.46    | 0.26   | 0.919 |
| PF3D7_1448800 | -1.29  | 0.536  | 0.918 | 1.19    | 0.595  | 0.936 |
| PF3D7_1120500 | 3.04   | 0.413  | 0.918 | -0.511  | 0.864  | 0.98  |
| PF3D7_1471900 | 1.16   | 0.712  | 0.933 | -1.76   | 0.591  | 0.935 |
| PF3D7_0803100 | -16.5  | 0.0779 | 0.918 | 21      | 0.0825 | 0.919 |
| PF3D7_0612300 | -2.93  | 0.403  | 0.918 | 1.6     | 0.757  | 0.962 |

|               |        |       |       |        |        |       |
|---------------|--------|-------|-------|--------|--------|-------|
| PF3D7_0930500 | 5.23   | 0.28  | 0.918 | -6.73  | 0.223  | 0.919 |
| PF3D7_1325700 | -4.33  | 0.572 | 0.918 | 4.26   | 0.577  | 0.933 |
| PFC10_API0041 | -0.421 | 0.865 | 0.972 | -0.855 | 0.645  | 0.95  |
| PF3D7_0917800 | -3.99  | 0.239 | 0.918 | -3.96  | 0.368  | 0.919 |
| PF3D7_1108000 | -4.28  | 0.139 | 0.918 | -1.62  | 0.652  | 0.95  |
| PF3D7_1012000 | 2.29   | 0.611 | 0.919 | 0.535  | 0.919  | 0.988 |
| PF3D7_1206100 | 0.0802 | 0.983 | 0.998 | 2.03   | 0.539  | 0.924 |
| PF3D7_1107500 | 0.811  | 0.583 | 0.918 | -0.533 | 0.693  | 0.954 |
| PF3D7_0827900 | 1.21   | 0.629 | 0.919 | -1.19  | 0.778  | 0.963 |
| PF3D7_0219400 | 0.0213 | 0.982 | 0.998 | -0.065 | 0.945  | 0.994 |
| PF3D7_0100600 | 3.95   | 0.173 | 0.918 | -3.52  | 0.188  | 0.919 |
| PF3D7_0813400 | -0.963 | 0.557 | 0.918 | 1.81   | 0.273  | 0.919 |
| PF3D7_0605600 | 0.331  | 0.742 | 0.939 | 0.126  | 0.907  | 0.984 |
| PF3D7_0419700 | 0.417  | 0.881 | 0.978 | -0.428 | 0.885  | 0.981 |
| PF3D7_1458000 | -2     | 0.197 | 0.918 | 3.3    | 0.181  | 0.919 |
| PF3D7_1142900 | -3.81  | 0.468 | 0.918 | 8.23   | 0.16   | 0.919 |
| PF3D7_1136500 | 1.02   | 0.777 | 0.943 | 1.83   | 0.655  | 0.95  |
| PF3D7_0922800 | 0.146  | 0.828 | 0.959 | 0.539  | 0.58   | 0.933 |
| PF3D7_0318400 | -1.53  | 0.235 | 0.918 | 0.194  | 0.957  | 0.994 |
| PF3D7_0321900 | -5.31  | 0.169 | 0.918 | 4.31   | 0.219  | 0.919 |
| PF3D7_0424000 | -4.04  | 0.252 | 0.918 | 3.92   | 0.242  | 0.919 |
| PF3D7_1216200 | -3.39  | 0.325 | 0.918 | 1.69   | 0.597  | 0.936 |
| PF3D7_1252400 | -1.91  | 0.116 | 0.918 | 2.3    | 0.0855 | 0.919 |
| PF3D7_0831400 | 5.63   | 0.223 | 0.918 | -3.71  | 0.305  | 0.919 |
| PF3D7_0409400 | -3.98  | 0.507 | 0.918 | 4.36   | 0.461  | 0.919 |
| PF3D7_0517200 | -0.738 | 0.806 | 0.953 | -2.84  | 0.389  | 0.919 |
| PF3D7_0901900 | 3.08   | 0.337 | 0.918 | -0.861 | 0.752  | 0.961 |
| PF3D7_1317700 | -1.78  | 0.34  | 0.918 | 3.92   | 0.229  | 0.919 |
| PF3D7_1328800 | -0.346 | 0.9   | 0.98  | 1.74   | 0.696  | 0.954 |
| PF3D7_1478700 | 3.02   | 0.359 | 0.918 | -1.06  | 0.572  | 0.932 |
| PF3D7_0901200 | -5.65  | 0.377 | 0.918 | 5.03   | 0.422  | 0.919 |
| PF3D7_0214100 | -2.89  | 0.164 | 0.918 | 4.55   | 0.0813 | 0.919 |
| PF3D7_1125800 | -2.25  | 0.135 | 0.918 | 3.98   | 0.0505 | 0.919 |
| PFB0300c      | 0.625  | 0.392 | 0.918 | -1.25  | 0.209  | 0.919 |
| PF3D7_0806000 | -1.02  | 0.146 | 0.918 | 2.36   | 0.146  | 0.919 |
| PF3D7_1031800 | -2.94  | 0.257 | 0.918 | 5.55   | 0.212  | 0.919 |
| PF3D7_0800100 | -3.11  | 0.246 | 0.918 | 3.75   | 0.211  | 0.919 |
| PF3D7_1352900 | -1.73  | 0.494 | 0.918 | -0.858 | 0.824  | 0.969 |
| PF3D7_0733000 | -9.98  | 0.349 | 0.918 | 18.9   | 0.128  | 0.919 |
| PF3D7_1322000 | -0.892 | 0.618 | 0.919 | 1.01   | 0.486  | 0.92  |
| PF3D7_1303300 | -2.13  | 0.199 | 0.918 | 1.39   | 0.656  | 0.95  |
| PF3D7_0505400 | -2.93  | 0.423 | 0.918 | 5.92   | 0.223  | 0.919 |
| PF3D7_1138100 | 8.42   | 0.111 | 0.918 | -7.79  | 0.0972 | 0.919 |
| PF3D7_0200700 | -0.742 | 0.565 | 0.918 | 0.779  | 0.55   | 0.924 |
| PF3D7_0725000 | 6.34   | 0.18  | 0.918 | -7.85  | 0.127  | 0.919 |
| PF3D7_1312400 | -0.81  | 0.793 | 0.95  | 1.02   | 0.766  | 0.962 |
| PF3D7_0715600 | -3.82  | 0.32  | 0.918 | 4.76   | 0.244  | 0.919 |

|               |         |        |       |         |        |       |
|---------------|---------|--------|-------|---------|--------|-------|
| PF3D7_0704300 | -4.85   | 0.245  | 0.918 | 13.8    | 0.085  | 0.919 |
| PF3D7_0709000 | 1.17    | 0.714  | 0.934 | 3.1     | 0.467  | 0.919 |
| PF3D7_0216900 | -3.23   | 0.41   | 0.918 | 13.3    | 0.0352 | 0.919 |
| PFE1495w      | -6.05   | 0.386  | 0.918 | -2.97   | 0.511  | 0.924 |
| PF3D7_1204100 | -1.29   | 0.757  | 0.941 | 0.83    | 0.85   | 0.977 |
| PF3D7_0815700 | 14.2    | 0.0464 | 0.918 | -5.07   | 0.168  | 0.919 |
| PF3D7_1211200 | 0.237   | 0.739  | 0.938 | 2.88    | 0.426  | 0.919 |
| PF3D7_1334700 | 1.2     | 0.481  | 0.918 | 0.468   | 0.694  | 0.954 |
| PF3D7_1241400 | -5.09   | 0.128  | 0.918 | 6.41    | 0.0827 | 0.919 |
| PF3D7_1217000 | 0.2     | 0.974  | 0.995 | -0.372  | 0.951  | 0.994 |
| PF3D7_1122000 | -2.53   | 0.284  | 0.918 | 5.72    | 0.225  | 0.919 |
| PF3D7_0410400 | 0.749   | 0.549  | 0.918 | 0.41    | 0.805  | 0.966 |
| PF3D7_0801000 | -0.982  | 0.771  | 0.943 | 1.18    | 0.778  | 0.963 |
| PF3D7_1143500 | -0.543  | 0.862  | 0.971 | 0.866   | 0.837  | 0.973 |
| PF3D7_1248100 | -2.49   | 0.174  | 0.918 | 2.35    | 0.149  | 0.919 |
| PF3D7_0617600 | 0.29    | 0.65   | 0.92  | 0.218   | 0.774  | 0.963 |
| PF3D7_1309000 | -2.06   | 0.32   | 0.918 | 5.24    | 0.186  | 0.919 |
| PF3D7_0523000 | -1.38   | 0.53   | 0.918 | 2.79    | 0.376  | 0.919 |
| PF3D7_1119000 | -0.743  | 0.596  | 0.918 | 0.659   | 0.849  | 0.976 |
| PF3D7_1110500 | 1.83    | 0.227  | 0.918 | 0.284   | 0.866  | 0.981 |
| PF3D7_0911600 | -2.5    | 0.447  | 0.918 | 2.87    | 0.383  | 0.919 |
| PF3D7_0618900 | 1.81    | 0.172  | 0.918 | 1.66    | 0.271  | 0.919 |
| PF3D7_0628600 | 6.89    | 0.11   | 0.918 | -10.2   | 0.105  | 0.919 |
| PF3D7_0221200 | 5.16    | 0.254  | 0.918 | 3.36    | 0.272  | 0.919 |
| PF3D7_0906600 | -2.31   | 0.362  | 0.918 | 4.25    | 0.356  | 0.919 |
| PF3D7_1132600 | -8.28   | 0.176  | 0.918 | 9       | 0.136  | 0.919 |
| PF3D7_1006800 | -6.58   | 0.166  | 0.918 | 6.24    | 0.249  | 0.919 |
| PF3D7_1331600 | 7.24    | 0.202  | 0.918 | -3.18   | 0.6    | 0.936 |
| PF3D7_0510700 | 0.233   | 0.94   | 0.989 | -1.73   | 0.619  | 0.942 |
| PF3D7_0527500 | -8.52   | 0.204  | 0.918 | 3.6     | 0.326  | 0.919 |
| PF3D7_0813900 | -2.66   | 0.473  | 0.918 | 1.34    | 0.688  | 0.954 |
| PF3D7_0414000 | -6.05   | 0.2    | 0.918 | 7.77    | 0.132  | 0.919 |
| PF3D7_0208000 | 0.235   | 0.933  | 0.987 | 4.48    | 0.239  | 0.919 |
| PF3D7_1443400 | -1.11   | 0.696  | 0.931 | 1.28    | 0.714  | 0.957 |
| PF3D7_1403600 | 0.135   | 0.957  | 0.992 | 3.08    | 0.662  | 0.951 |
| PF3D7_0831500 | 0.0544  | 0.932  | 0.987 | -1.45   | 0.246  | 0.919 |
| PF3D7_0903300 | -0.603  | 0.476  | 0.918 | 1.04    | 0.294  | 0.919 |
| PF3D7_1132900 | -3.41   | 0.788  | 0.948 | 16.9    | 0.0475 | 0.919 |
| PF3D7_1414900 | 0.45    | 0.901  | 0.98  | -0.282  | 0.936  | 0.994 |
| PF3D7_1455800 | 2.31    | 0.406  | 0.918 | 0.00398 | 0.999  | 1     |
| PF3D7_0518800 | 6.99    | 0.374  | 0.918 | -6.36   | 0.409  | 0.919 |
| PF3D7_1234900 | -1.49   | 0.754  | 0.94  | -0.26   | 0.96   | 0.994 |
| PF3D7_1227000 | -14.8   | 0.0739 | 0.918 | 9.47    | 0.125  | 0.919 |
| PF3D7_1421900 | 0.0536  | 0.989  | 0.999 | 3.01    | 0.434  | 0.919 |
| PF3D7_1149700 | -0.213  | 0.903  | 0.98  | -0.264  | 0.949  | 0.994 |
| PF3D7_1400500 | 0.00569 | 0.996  | 0.999 | 0.386   | 0.764  | 0.962 |
| PF3D7_0421700 | 0.244   | 0.765  | 0.941 | -0.671  | 0.671  | 0.954 |

|               |        |        |       |        |        |       |
|---------------|--------|--------|-------|--------|--------|-------|
| PF3D7_0712900 | 1.59   | 0.257  | 0.918 | 0.401  | 0.751  | 0.961 |
| PF3D7_1241300 | 1.79   | 0.34   | 0.918 | 0.554  | 0.8    | 0.965 |
| PF3D7_1251800 | -0.216 | 0.842  | 0.962 | 2.79   | 0.32   | 0.919 |
| PF3D7_0110200 | -3.96  | 0.449  | 0.918 | 4.42   | 0.263  | 0.919 |
| PF3D7_0731100 | -3.65  | 0.314  | 0.918 | 3.42   | 0.28   | 0.919 |
| PF3D7_1020400 | -0.967 | 0.606  | 0.918 | 0.832  | 0.692  | 0.954 |
| PF3D7_0628000 | 0.677  | 0.895  | 0.98  | -0.181 | 0.964  | 0.996 |
| PF3D7_0927400 | -8     | 0.155  | 0.918 | 13.1   | 0.039  | 0.919 |
| PF3D7_1107400 | -1.12  | 0.526  | 0.918 | 1.7    | 0.488  | 0.921 |
| PF3D7_1354200 | 3.41   | 0.489  | 0.918 | -0.728 | 0.894  | 0.982 |
| PF3D7_0501500 | 0.017  | 0.996  | 0.999 | 0.139  | 0.962  | 0.995 |
| PF3D7_0824500 | -1.25  | 0.785  | 0.947 | 2.46   | 0.559  | 0.927 |
| PFE1195w      | 0.603  | 0.887  | 0.979 | -0.636 | 0.868  | 0.981 |
| PF3D7_1358000 | -0.662 | 0.778  | 0.943 | 0.173  | 0.942  | 0.994 |
| PF3D7_0110900 | -1.65  | 0.452  | 0.918 | -1.63  | 0.527  | 0.924 |
| PF3D7_0407700 | -0.323 | 0.786  | 0.948 | 0.331  | 0.801  | 0.965 |
| PF3D7_0710300 | 2.74   | 0.757  | 0.941 | 13.6   | 0.274  | 0.919 |
| PF3D7_1315300 | 0.51   | 0.772  | 0.943 | -0.67  | 0.709  | 0.955 |
| PF3D7_1019700 | 8.57   | 0.12   | 0.918 | -9.78  | 0.106  | 0.919 |
| PF3D7_1337000 | -5.82  | 0.209  | 0.918 | 4.96   | 0.278  | 0.919 |
| PF3D7_0307500 | -4.19  | 0.236  | 0.918 | 5.45   | 0.165  | 0.919 |
| PF3D7_1349600 | -2.07  | 0.499  | 0.918 | 2.25   | 0.436  | 0.919 |
| PF3D7_0813800 | 1.53   | 0.747  | 0.94  | 0.0709 | 0.988  | 0.998 |
| PF3D7_0623600 | 7.54   | 0.184  | 0.918 | -4.69  | 0.35   | 0.919 |
| PF3D7_1128300 | -1.48  | 0.508  | 0.918 | -0.932 | 0.725  | 0.957 |
| PF3D7_0318000 | 0.721  | 0.684  | 0.925 | 0.954  | 0.519  | 0.924 |
| PF3D7_1329700 | -4     | 0.197  | 0.918 | 4.9    | 0.114  | 0.919 |
| PF3D7_0933300 | 9.71   | 0.0984 | 0.918 | -5.23  | 0.236  | 0.919 |
| PF3D7_0824000 | 1.47   | 0.604  | 0.918 | -2.7   | 0.386  | 0.919 |
| PF3D7_1452900 | -0.257 | 0.931  | 0.987 | 1.12   | 0.57   | 0.931 |
| PF3D7_0517500 | 3.83   | 0.214  | 0.918 | -2.68  | 0.368  | 0.919 |
| PF3D7_1120700 | 2.51   | 0.287  | 0.918 | 0.342  | 0.878  | 0.981 |
| PF3D7_0315400 | -0.93  | 0.203  | 0.918 | 2.41   | 0.0527 | 0.919 |
| PF3D7_0915400 | -1.71  | 0.474  | 0.918 | 0.734  | 0.723  | 0.957 |
| PF3D7_1120200 | 0.118  | 0.807  | 0.953 | 0.0198 | 0.987  | 0.998 |
| PF3D7_1406700 | -1.16  | 0.746  | 0.94  | 3.13   | 0.501  | 0.924 |
| PF3D7_1373000 | 2.26   | 0.346  | 0.918 | -2.08  | 0.371  | 0.919 |
| PF3D7_0709700 | -1.39  | 0.632  | 0.919 | 0.0505 | 0.987  | 0.998 |
| PF3D7_0628200 | -3.78  | 0.123  | 0.918 | 6.03   | 0.0955 | 0.919 |
| PF3D7_1136700 | -2.28  | 0.555  | 0.918 | 2.76   | 0.47   | 0.919 |
| PF3D7_1315900 | 0.758  | 0.659  | 0.921 | 11.1   | 0.102  | 0.919 |
| PF3D7_1023400 | -7.67  | 0.213  | 0.918 | 7.52   | 0.239  | 0.919 |
| PF3D7_1411000 | 38.3   | 0.135  | 0.918 | -29.5  | 0.147  | 0.919 |
| PF3D7_1413600 | -6.66  | 0.256  | 0.918 | 6.61   | 0.251  | 0.919 |
| PF3D7_0921400 | -2.62  | 0.57   | 0.918 | 4      | 0.382  | 0.919 |
| PF3D7_1334500 | 0.575  | 0.367  | 0.918 | 1.34   | 0.334  | 0.919 |
| PF3D7_1435100 | -10.4  | 0.106  | 0.918 | 12.7   | 0.114  | 0.919 |

|               |        |        |       |         |        |       |
|---------------|--------|--------|-------|---------|--------|-------|
| PF3D7_0724800 | 2.16   | 0.555  | 0.918 | -1.11   | 0.775  | 0.963 |
| PF3D7_0412200 | -2.46  | 0.358  | 0.918 | -0.107  | 0.942  | 0.994 |
| PF3D7_1336000 | 2.41   | 0.52   | 0.918 | 3.22    | 0.552  | 0.924 |
| PF3D7_1361100 | -1.12  | 0.703  | 0.931 | 3.58    | 0.221  | 0.919 |
| PF3D7_1325500 | 0.948  | 0.542  | 0.918 | 0.21    | 0.897  | 0.982 |
| PF3D7_1228100 | -2.4   | 0.335  | 0.918 | 3.28    | 0.244  | 0.919 |
| PF3D7_0417800 | 1.8    | 0.657  | 0.921 | -1.9    | 0.649  | 0.95  |
| PF3D7_0730800 | -9.05  | 0.231  | 0.918 | 13.4    | 0.121  | 0.919 |
| PF3D7_0718600 | 3.81   | 0.138  | 0.918 | -2.73   | 0.347  | 0.919 |
| PF3D7_0523400 | -2.61  | 0.315  | 0.918 | 5.49    | 0.129  | 0.919 |
| PF3D7_0805800 | 15.3   | 0.0693 | 0.918 | -15.7   | 0.0496 | 0.919 |
| PF3D7_1139500 | -2.96  | 0.291  | 0.918 | 5.09    | 0.197  | 0.919 |
| PF3D7_1123900 | -3.21  | 0.397  | 0.918 | 3.87    | 0.346  | 0.919 |
| PF3D7_0513900 | -1.06  | 0.539  | 0.918 | 1.7     | 0.363  | 0.919 |
| PF3D7_1318100 | 10     | 0.0555 | 0.918 | -5.48   | 0.217  | 0.919 |
| PF3D7_1221600 | 0.0287 | 0.949  | 0.991 | 0.401   | 0.494  | 0.921 |
| PF3D7_1015700 | 0.258  | 0.745  | 0.94  | -0.309  | 0.698  | 0.954 |
| PF3D7_1455900 | -1.31  | 0.564  | 0.918 | 3.95    | 0.411  | 0.919 |
| PF3D7_0822100 | -4.56  | 0.469  | 0.918 | 4.1     | 0.523  | 0.924 |
| PF3D7_0619000 | 0.958  | 0.655  | 0.921 | 1.95    | 0.34   | 0.919 |
| PF3D7_1323000 | 1.25   | 0.784  | 0.947 | -1.96   | 0.46   | 0.919 |
| PF3D7_1253800 | -8.17  | 0.0856 | 0.918 | 9.18    | 0.0641 | 0.919 |
| PF3D7_1216700 | 0.312  | 0.899  | 0.98  | -0.481  | 0.841  | 0.975 |
| PF3D7_0412900 | -1.68  | 0.203  | 0.918 | 3.36    | 0.107  | 0.919 |
| PF3D7_0821100 | -3.47  | 0.432  | 0.918 | 4.41    | 0.323  | 0.919 |
| PF3D7_0610100 | 1.67   | 0.622  | 0.919 | -1.77   | 0.614  | 0.942 |
| PF3D7_1210400 | 6.74   | 0.212  | 0.918 | -2.79   | 0.438  | 0.919 |
| PF3D7_0923000 | 8.8    | 0.0885 | 0.918 | -6.58   | 0.154  | 0.919 |
| PF3D7_1014500 | 1.35   | 0.54   | 0.918 | -1.4    | 0.503  | 0.924 |
| PF3D7_1411600 | -0.246 | 0.719  | 0.937 | -0.612  | 0.607  | 0.939 |
| PF3D7_0812800 | -0.336 | 0.804  | 0.953 | -2.16   | 0.516  | 0.924 |
| PF3D7_0901700 | -3.08  | 0.483  | 0.918 | 2.37    | 0.554  | 0.926 |
| PF3D7_0832900 | 0.43   | 0.704  | 0.931 | -0.0185 | 0.981  | 0.998 |
| PF3D7_0413200 | 0.474  | 0.702  | 0.931 | -0.315  | 0.826  | 0.97  |
| PF3D7_0222700 | -1.22  | 0.411  | 0.918 | 2.3     | 0.223  | 0.919 |
| PF3D7_0404600 | 0.212  | 0.658  | 0.921 | 0.571   | 0.377  | 0.919 |
| PFC10_API0013 | 1.74   | 0.47   | 0.918 | -4.61   | 0.495  | 0.921 |
| PF3D7_0810100 | -0.317 | 0.884  | 0.979 | -0.53   | 0.895  | 0.982 |
| PF3D7_1026200 | 5.36   | 0.299  | 0.918 | -4.87   | 0.34   | 0.919 |
| PF3D7_0632100 | 0.212  | 0.819  | 0.955 | 0.343   | 0.762  | 0.962 |
| PF3D7_0730000 | -0.782 | 0.621  | 0.919 | 0.775   | 0.641  | 0.95  |
| PF3D7_1347000 | 0.751  | 0.512  | 0.918 | -0.849  | 0.552  | 0.924 |
| PF3D7_0306100 | -2.34  | 0.539  | 0.918 | 2.88    | 0.423  | 0.919 |
| PF3D7_1450600 | 3.35   | 0.484  | 0.918 | -3.73   | 0.431  | 0.919 |
| PF3D7_1205300 | 5.38   | 0.391  | 0.918 | -4.97   | 0.435  | 0.919 |
| PF3D7_0930800 | -0.34  | 0.81   | 0.953 | -0.286  | 0.846  | 0.975 |
| PF3D7_0109500 | 1.28   | 0.65   | 0.92  | 1.13    | 0.806  | 0.967 |

|               |        |        |       |         |        |       |
|---------------|--------|--------|-------|---------|--------|-------|
| PF3D7_0311400 | 2.48   | 0.423  | 0.918 | -2.72   | 0.359  | 0.919 |
| PF3D7_1353500 | -7.5   | 0.116  | 0.918 | 2.85    | 0.564  | 0.93  |
| PF3D7_1426200 | 4.21   | 0.422  | 0.918 | -12.4   | 0.0821 | 0.919 |
| PF3D7_0209100 | -3.78  | 0.168  | 0.918 | 5.41    | 0.095  | 0.919 |
| PF3D7_0822600 | -2.27  | 0.422  | 0.918 | 3.95    | 0.249  | 0.919 |
| PF3D7_0929100 | -3.81  | 0.24   | 0.918 | 5.33    | 0.159  | 0.919 |
| PF3D7_1413900 | 1.32   | 0.702  | 0.931 | -0.254  | 0.958  | 0.994 |
| PF3D7_1429200 | -0.265 | 0.764  | 0.941 | -0.126  | 0.906  | 0.984 |
| PF3D7_1137900 | -3.85  | 0.326  | 0.918 | 3.74    | 0.377  | 0.919 |
| PF3D7_1336600 | -0.64  | 0.723  | 0.937 | -1.87   | 0.47   | 0.919 |
| PF3D7_0502800 | -4.79  | 0.208  | 0.918 | 2.98    | 0.541  | 0.924 |
| PF3D7_0819600 | -3.49  | 0.125  | 0.918 | 4.16    | 0.103  | 0.919 |
| PF3D7_0401700 | 4      | 0.302  | 0.918 | -4.21   | 0.371  | 0.919 |
| PF3D7_1367500 | -0.103 | 0.953  | 0.992 | 1.77    | 0.324  | 0.919 |
| PF3D7_1464000 | 1.7    | 0.12   | 0.918 | 3.89    | 0.26   | 0.919 |
| PF13_0012     | -4.23  | 0.46   | 0.918 | 5.09    | 0.38   | 0.919 |
| PF3D7_1475800 | -1.58  | 0.377  | 0.918 | 7.55    | 0.0462 | 0.919 |
| PF3D7_0703400 | 0.971  | 0.501  | 0.918 | -1.23   | 0.603  | 0.937 |
| PF3D7_1455500 | -10.3  | 0.126  | 0.918 | 4.61    | 0.321  | 0.919 |
| PF3D7_1466700 | -0.112 | 0.976  | 0.996 | 0.118   | 0.975  | 0.998 |
| PF3D7_1457900 | -2.77  | 0.405  | 0.918 | 2.83    | 0.366  | 0.919 |
| PF3D7_1235300 | -0.562 | 0.555  | 0.918 | 0.272   | 0.798  | 0.965 |
| PF3D7_0615900 | 1.69   | 0.677  | 0.923 | -3.43   | 0.454  | 0.919 |
| PF3D7_1004200 | 2.06   | 0.597  | 0.918 | -1.36   | 0.741  | 0.958 |
| PF3D7_0220300 | 1.73   | 0.521  | 0.918 | -1.96   | 0.342  | 0.919 |
| PF3D7_1229000 | -35.9  | 0.0554 | 0.918 | 34      | 0.0585 | 0.919 |
| PF3D7_1245400 | 2.4    | 0.439  | 0.918 | -3.32   | 0.344  | 0.919 |
| PF3D7_1442600 | 0.105  | 0.958  | 0.992 | -1.05   | 0.685  | 0.954 |
| PF3D7_1313600 | 0.402  | 0.907  | 0.981 | 1.32    | 0.728  | 0.957 |
| PF3D7_1316600 | 0.36   | 0.932  | 0.987 | -2.55   | 0.297  | 0.919 |
| PF3D7_1321300 | 1.79   | 0.625  | 0.919 | 1.37    | 0.66   | 0.95  |
| PF3D7_1441700 | -0.192 | 0.649  | 0.92  | -0.0757 | 0.894  | 0.982 |
| PF3D7_1463500 | -0.765 | 0.601  | 0.918 | -0.0222 | 0.995  | 0.999 |
| PF3D7_1116800 | 0.807  | 0.714  | 0.934 | -2.02   | 0.349  | 0.919 |
| PF3D7_0307200 | -1.85  | 0.599  | 0.918 | 4.31    | 0.413  | 0.919 |
| PF3D7_0936100 | 7.16   | 0.109  | 0.918 | -5.29   | 0.183  | 0.919 |
| PF3D7_1009500 | -1.99  | 0.278  | 0.918 | -0.522  | 0.763  | 0.962 |
| PF3D7_1229400 | -0.215 | 0.961  | 0.992 | -0.0899 | 0.98   | 0.998 |
| PF3D7_0606700 | 0.579  | 0.723  | 0.937 | -0.077  | 0.96   | 0.995 |
| PF3D7_1311900 | -1.73  | 0.666  | 0.923 | 2.82    | 0.422  | 0.919 |
| PF3D7_1001600 | -2.72  | 0.236  | 0.918 | 5.61    | 0.147  | 0.919 |
| PF3D7_1415500 | -25.9  | 0.111  | 0.918 | 25.4    | 0.123  | 0.919 |
| PF3D7_1227600 | 2.3    | 0.338  | 0.918 | 0.257   | 0.908  | 0.984 |
| PF3D7_1140700 | -1.54  | 0.482  | 0.918 | 4.17    | 0.264  | 0.919 |
| PF3D7_1237200 | -14.1  | 0.16   | 0.918 | 2.21    | 0.48   | 0.92  |
| PF3D7_0826200 | -2.2   | 0.624  | 0.919 | -0.824  | 0.741  | 0.958 |
| PF3D7_1136600 | 3.11   | 0.303  | 0.918 | -3.44   | 0.234  | 0.919 |

|               |        |        |       |        |        |       |
|---------------|--------|--------|-------|--------|--------|-------|
| PF3D7_1350700 | -0.738 | 0.581  | 0.918 | 1.02   | 0.489  | 0.921 |
| PF3D7_1008200 | 1.66   | 0.282  | 0.918 | 0.7    | 0.692  | 0.954 |
| PF3D7_1451700 | 2.01   | 0.512  | 0.918 | -3.44  | 0.506  | 0.924 |
| PF3D7_1206600 | -1.22  | 0.459  | 0.918 | 2.7    | 0.222  | 0.919 |
| PF3D7_1404700 | 1.02   | 0.66   | 0.921 | 1.14   | 0.484  | 0.92  |
| PF3D7_1250000 | 1.13   | 0.587  | 0.918 | -0.402 | 0.8    | 0.965 |
| PFC0365w      | -1.43  | 0.628  | 0.919 | 0.735  | 0.783  | 0.963 |
| PF3D7_0100100 | -13.4  | 0.326  | 0.918 | 37.5   | 0.292  | 0.919 |
| PF3D7_1024200 | 3.83   | 0.296  | 0.918 | -3.87  | 0.293  | 0.919 |
| PF3D7_0521500 | -0.417 | 0.667  | 0.923 | 1.1    | 0.358  | 0.919 |
| PF3D7_1248500 | -11.8  | 0.104  | 0.918 | 7.28   | 0.193  | 0.919 |
| PF3D7_1114800 | 12.5   | 0.0583 | 0.918 | -7     | 0.172  | 0.919 |
| PF3D7_1479800 | 1.59   | 0.461  | 0.918 | -0.62  | 0.689  | 0.954 |
| PF3D7_1447800 | 0.0379 | 0.951  | 0.992 | 0.247  | 0.859  | 0.979 |
| PF3D7_0617200 | 5.03   | 0.349  | 0.918 | -4.01  | 0.392  | 0.919 |
| PF3D7_0506700 | -4.26  | 0.294  | 0.918 | 2.66   | 0.466  | 0.919 |
| PF3D7_1444400 | -5.89  | 0.284  | 0.918 | 9.69   | 0.104  | 0.919 |
| PF3D7_0607400 | -11.5  | 0.202  | 0.918 | 13.4   | 0.142  | 0.919 |
| PF3D7_0405500 | -1.64  | 0.437  | 0.918 | 3.39   | 0.339  | 0.919 |
| PF3D7_1324400 | -1.63  | 0.582  | 0.918 | 0.471  | 0.891  | 0.982 |
| PF3D7_1354900 | 0.484  | 0.882  | 0.979 | 1.96   | 0.657  | 0.95  |
| PF3D7_1230600 | 1.52   | 0.409  | 0.918 | -2.94  | 0.33   | 0.919 |
| PF3D7_0914000 | -1.37  | 0.66   | 0.921 | 1.77   | 0.574  | 0.933 |
| PF3D7_0808000 | 4.35   | 0.232  | 0.918 | -2.57  | 0.437  | 0.919 |
| PF3D7_0625400 | 0.187  | 0.814  | 0.953 | 1.51   | 0.329  | 0.919 |
| PF3D7_0620400 | -0.247 | 0.519  | 0.918 | 1.33   | 0.198  | 0.919 |
| PF3D7_1407400 | 0.773  | 0.576  | 0.918 | -0.77  | 0.742  | 0.958 |
| PF3D7_0630400 | 0.359  | 0.894  | 0.98  | 0.801  | 0.752  | 0.961 |
| PF3D7_1479900 | -0.706 | 0.837  | 0.961 | 1.02   | 0.688  | 0.954 |
| PF3D7_1435900 | -4.07  | 0.17   | 0.918 | 5.93   | 0.111  | 0.919 |
| PF3D7_0607300 | -4.63  | 0.18   | 0.918 | 5.86   | 0.113  | 0.919 |
| PF3D7_1471800 | 84.7   | 0.997  | 0.999 | 24.4   | 0.998  | 1     |
| PF3D7_1460200 | 1.09   | 0.559  | 0.918 | -0.706 | 0.761  | 0.962 |
| PF3D7_1124300 | 0.115  | 0.792  | 0.949 | 0.829  | 0.262  | 0.919 |
| PF3D7_1337500 | 3.54   | 0.381  | 0.918 | -2.32  | 0.584  | 0.933 |
| PF3D7_0208400 | -0.831 | 0.462  | 0.918 | 1.17   | 0.403  | 0.919 |
| PF3D7_0219600 | -1.32  | 0.474  | 0.918 | 0.729  | 0.732  | 0.957 |
| PF3D7_1462400 | -1.9   | 0.602  | 0.918 | 1.94   | 0.568  | 0.931 |
| PF3D7_1132800 | -1.47  | 0.723  | 0.937 | 6.62   | 0.227  | 0.919 |
| PF3D7_0317400 | 3.15   | 0.301  | 0.918 | -1.14  | 0.713  | 0.957 |
| PF3D7_0419300 | -2.53  | 0.641  | 0.919 | 1.96   | 0.695  | 0.954 |
| PF3D7_1011500 | -3.38  | 0.103  | 0.918 | 3.99   | 0.0714 | 0.919 |
| PF3D7_0527000 | 3.96   | 0.289  | 0.918 | -3.19  | 0.446  | 0.919 |
| PF3D7_0625500 | 5.42   | 0.224  | 0.918 | -4.07  | 0.339  | 0.919 |
| PF3D7_1303100 | -5.36  | 0.349  | 0.918 | 13.1   | 0.117  | 0.919 |
| PF3D7_0502700 | 0.117  | 0.807  | 0.953 | 0.521  | 0.586  | 0.933 |
| PF3D7_0213700 | -3.55  | 0.318  | 0.918 | 6.79   | 0.0858 | 0.919 |

|               |         |        |       |        |        |       |
|---------------|---------|--------|-------|--------|--------|-------|
| PF3D7_0722400 | -0.197  | 0.968  | 0.993 | 2.77   | 0.502  | 0.924 |
| PF3D7_0532300 | -0.0891 | 0.834  | 0.96  | 2.06   | 0.102  | 0.919 |
| PF3D7_0504700 | 5.63    | 0.229  | 0.918 | -7.11  | 0.159  | 0.919 |
| PF3D7_1362800 | -2.49   | 0.218  | 0.918 | 2.37   | 0.23   | 0.919 |
| PF3D7_1205700 | -9.54   | 0.0874 | 0.918 | 6.42   | 0.221  | 0.919 |
| PF3D7_0936800 | -41.8   | 0.999  | 1     | 119    | 0.999  | 1     |
| PF3D7_1022600 | -9.42   | 0.1    | 0.918 | 2.67   | 0.545  | 0.924 |
| PF3D7_0614800 | -0.544  | 0.751  | 0.94  | -0.273 | 0.902  | 0.984 |
| PF3D7_0816800 | 26.1    | 0.154  | 0.918 | -12.8  | 0.0914 | 0.919 |
| PF3D7_0824900 | 0.709   | 0.762  | 0.941 | -0.725 | 0.753  | 0.961 |
| PF3D7_0321200 | 8.17    | 0.087  | 0.918 | -3.07  | 0.339  | 0.919 |
| PF3D7_1339600 | 3.21    | 0.459  | 0.918 | -1.54  | 0.629  | 0.946 |
| PF10_0319     | 17.1    | 0.0706 | 0.918 | -17.4  | 0.0569 | 0.919 |
| PF3D7_0512700 | 19.6    | 0.0833 | 0.918 | -21.2  | 0.0679 | 0.919 |
| PF3D7_1450900 | -1.86   | 0.731  | 0.937 | 7.4    | 0.34   | 0.919 |
| PF3D7_0920800 | -6.01   | 0.256  | 0.918 | 8.49   | 0.175  | 0.919 |
| PF3D7_1366200 | 11      | 0.282  | 0.918 | -2.27  | 0.633  | 0.948 |
| PF3D7_1363400 | -1.46   | 0.274  | 0.918 | 1.8    | 0.204  | 0.919 |
| PF3D7_1217600 | 5.77    | 0.2    | 0.918 | -7.66  | 0.153  | 0.919 |
| PF3D7_0937500 | 0.168   | 0.895  | 0.98  | 0.634  | 0.846  | 0.975 |
| PF3D7_0820200 | -0.247  | 0.653  | 0.921 | 0.853  | 0.481  | 0.92  |
| PF3D7_1211300 | -3.47   | 0.351  | 0.918 | 6.11   | 0.144  | 0.919 |
| PF3D7_1346800 | -3.24   | 0.403  | 0.918 | 2.51   | 0.498  | 0.923 |
| PFA0270c      | -1.61   | 0.43   | 0.918 | 2.31   | 0.282  | 0.919 |
| PF3D7_0900300 | -0.298  | 0.945  | 0.99  | 0.224  | 0.957  | 0.994 |
| PF3D7_0503300 | 1.69    | 0.264  | 0.918 | 1.72   | 0.496  | 0.922 |
| PF3D7_0821000 | -0.203  | 0.797  | 0.952 | 4.59   | 0.217  | 0.919 |
| PF3D7_1210600 | -0.194  | 0.651  | 0.92  | 0.157  | 0.803  | 0.965 |
| PF3D7_1338800 | 4.55    | 0.204  | 0.918 | -9.26  | 0.0789 | 0.919 |
| PF3D7_1465200 | 0.157   | 0.798  | 0.953 | 0.491  | 0.671  | 0.954 |
| PF3D7_1356200 | -7.09   | 0.121  | 0.918 | -0.761 | 0.879  | 0.981 |
| PF3D7_1118300 | 11.1    | 0.0677 | 0.918 | -4.64  | 0.139  | 0.919 |
| PF3D7_1328000 | 1.03    | 0.463  | 0.918 | 0.0326 | 0.986  | 0.998 |
| PF3D7_0300200 | 0.415   | 0.775  | 0.943 | -0.107 | 0.946  | 0.994 |
| PF3D7_1309800 | -0.163  | 0.889  | 0.979 | -0.578 | 0.879  | 0.981 |
| PF3D7_1034400 | -2.03   | 0.679  | 0.923 | 10.4   | 0.141  | 0.919 |
| PF3D7_0528000 | -6.76   | 0.089  | 0.918 | -0.907 | 0.803  | 0.965 |
| PF14_0585     | 1.96    | 0.598  | 0.918 | -9.87  | 0.182  | 0.919 |
| PF3D7_1448000 | -0.193  | 0.698  | 0.931 | 1.43   | 0.41   | 0.919 |
| PF3D7_0705500 | 0.341   | 0.465  | 0.918 | 0.526  | 0.309  | 0.919 |
| PF3D7_1469100 | -20.4   | 0.0684 | 0.918 | 19.7   | 0.0692 | 0.919 |
| PF3D7_1420700 | 0.298   | 0.547  | 0.918 | 0.23   | 0.811  | 0.968 |
| PF3D7_1120800 | 1.95    | 0.334  | 0.918 | -0.58  | 0.767  | 0.962 |
| PF3D7_1234500 | 4.54    | 0.133  | 0.918 | -3.87  | 0.218  | 0.919 |
| PF3D7_0828600 | 1.18    | 0.668  | 0.923 | -0.95  | 0.743  | 0.958 |
| PF3D7_1130000 | -1.03   | 0.687  | 0.927 | 1.74   | 0.53   | 0.924 |
| PF3D7_0618700 | -0.472  | 0.421  | 0.918 | 3.13   | 0.173  | 0.919 |



|               |         |        |       |        |        |       |
|---------------|---------|--------|-------|--------|--------|-------|
| PF3D7_0323400 | -1.07   | 0.803  | 0.953 | 0.843  | 0.839  | 0.974 |
| PF3D7_1332200 | -2.77   | 0.429  | 0.918 | 4.24   | 0.226  | 0.919 |
| PF3D7_1041200 | -4.45   | 0.439  | 0.918 | 4.49   | 0.406  | 0.919 |
| PF3D7_0929600 | 0.0201  | 0.992  | 0.999 | -0.393 | 0.796  | 0.965 |
| PF3D7_1112100 | -2.98   | 0.256  | 0.918 | 5.33   | 0.252  | 0.919 |
| PF3D7_0702400 | 0.0314  | 0.992  | 0.999 | -0.204 | 0.943  | 0.994 |
| PF3D7_0801600 | 3.36    | 0.227  | 0.918 | -3.35  | 0.286  | 0.919 |
| PF3D7_0310100 | 1.09    | 0.5    | 0.918 | 0.251  | 0.928  | 0.989 |
| PF3D7_0802400 | -0.858  | 0.683  | 0.925 | 1.3    | 0.516  | 0.924 |
| PF3D7_1362200 | -10.3   | 0.127  | 0.918 | 10.5   | 0.0848 | 0.919 |
| PF3D7_0632800 | -3.18   | 0.247  | 0.918 | 6.13   | 0.216  | 0.919 |
| PF3D7_1423400 | 2.83    | 0.551  | 0.918 | -2.63  | 0.577  | 0.933 |
| PF3D7_0617700 | 1.36    | 0.526  | 0.918 | -0.596 | 0.776  | 0.963 |
| PF3D7_0519900 | 1.36    | 0.596  | 0.918 | 1.6    | 0.615  | 0.942 |
| PF3D7_0113700 | -1.65   | 0.64   | 0.919 | 6.53   | 0.293  | 0.919 |
| PF3D7_1201800 | -4.82   | 0.151  | 0.918 | 4.57   | 0.187  | 0.919 |
| PF3D7_0322400 | -3.18   | 0.539  | 0.918 | 6.05   | 0.249  | 0.919 |
| PF3D7_1234800 | -1.12   | 0.764  | 0.941 | 3.49   | 0.29   | 0.919 |
| PF3D7_0521700 | -1.03   | 0.4    | 0.918 | 2.75   | 0.273  | 0.919 |
| PF3D7_0511100 | -5.39   | 0.365  | 0.918 | 9.64   | 0.138  | 0.919 |
| PF3D7_0425400 | -3.53   | 0.307  | 0.918 | 0.234  | 0.917  | 0.987 |
| PF3D7_0808100 | -0.168  | 0.791  | 0.949 | 1.64   | 0.0933 | 0.919 |
| PF14_0240     | -1.31   | 0.737  | 0.938 | 1.4    | 0.691  | 0.954 |
| PF3D7_0424100 | -1.98   | 0.554  | 0.918 | 2.76   | 0.362  | 0.919 |
| PF3D7_1319800 | 25.7    | 0.0684 | 0.918 | -3.59  | 0.519  | 0.924 |
| PF3D7_0900500 | -0.298  | 0.698  | 0.931 | 0.767  | 0.379  | 0.919 |
| PF3D7_0901000 | -0.794  | 0.334  | 0.918 | 1.49   | 0.121  | 0.919 |
| PF3D7_0932300 | -3.61   | 0.294  | 0.918 | 5.22   | 0.151  | 0.919 |
| PF3D7_0511400 | -1.51   | 0.391  | 0.918 | 2.2    | 0.281  | 0.919 |
| PF3D7_1318700 | -5.67   | 0.28   | 0.918 | 10.6   | 0.109  | 0.919 |
| PF3D7_1002700 | -1.41   | 0.679  | 0.923 | 2.85   | 0.523  | 0.924 |
| PF3D7_1347400 | -9.03   | 0.0719 | 0.918 | 6      | 0.0911 | 0.919 |
| PF3D7_1037400 | 2.46    | 0.601  | 0.918 | -3.11  | 0.496  | 0.922 |
| PF3D7_1475100 | 5.41    | 0.377  | 0.918 | 4.85   | 0.375  | 0.919 |
| PF3D7_1305100 | 0.897   | 0.589  | 0.918 | -0.818 | 0.639  | 0.95  |
| PF3D7_0928600 | -5.11   | 0.343  | 0.918 | 3.13   | 0.365  | 0.919 |
| PF3D7_1474300 | -0.605  | 0.712  | 0.933 | -0.419 | 0.836  | 0.973 |
| PF3D7_1331200 | -4.09   | 0.279  | 0.918 | 1.61   | 0.724  | 0.957 |
| PF3D7_0630500 | 8.17    | 0.162  | 0.918 | 1.27   | 0.811  | 0.968 |
| PF3D7_0616300 | -0.0462 | 0.938  | 0.989 | -0.308 | 0.68   | 0.954 |
| PF3D7_1012600 | -1.89   | 0.654  | 0.921 | 3.91   | 0.32   | 0.919 |
| PF3D7_1029500 | -0.949  | 0.659  | 0.921 | 0.789  | 0.715  | 0.957 |
| PF3D7_1120100 | 1.47    | 0.689  | 0.927 | -4.54  | 0.195  | 0.919 |
| PF3D7_1207000 | -1.4    | 0.59   | 0.918 | 0.869  | 0.734  | 0.957 |
| PF3D7_0423800 | -3.66   | 0.562  | 0.918 | 3.5    | 0.531  | 0.924 |
| PF3D7_0204100 | -0.597  | 0.608  | 0.918 | 0.999  | 0.449  | 0.919 |
| PF3D7_1423000 | 2.14    | 0.516  | 0.918 | -3.88  | 0.331  | 0.919 |

|               |         |        |       |         |        |       |
|---------------|---------|--------|-------|---------|--------|-------|
| PF3D7_0416100 | -1.08   | 0.812  | 0.953 | -3.78   | 0.459  | 0.919 |
| PF3D7_0406100 | 0.0652  | 0.984  | 0.998 | 4.1     | 0.257  | 0.919 |
| PF3D7_1308500 | -0.293  | 0.762  | 0.941 | 0.625   | 0.649  | 0.95  |
| PF3D7_0905300 | -0.123  | 0.942  | 0.989 | 1.57    | 0.423  | 0.919 |
| PF3D7_1460700 | 4.3     | 0.283  | 0.918 | -5.16   | 0.447  | 0.919 |
| PF3D7_0703700 | -0.333  | 0.486  | 0.918 | 0.28    | 0.623  | 0.942 |
| PF3D7_1310000 | 0.135   | 0.956  | 0.992 | -0.295  | 0.879  | 0.981 |
| PF3D7_0201800 | 1.49    | 0.531  | 0.918 | -1.92   | 0.444  | 0.919 |
| PF3D7_0522800 | -2.42   | 0.518  | 0.918 | 5.85    | 0.151  | 0.919 |
| PF3D7_0506800 | 0.121   | 0.951  | 0.992 | 3.19    | 0.295  | 0.919 |
| PF3D7_1331100 | -2.1    | 0.156  | 0.918 | 6.28    | 0.238  | 0.919 |
| PF3D7_0833100 | 3.74    | 0.286  | 0.918 | -3.33   | 0.322  | 0.919 |
| PF3D7_1343100 | -1.55   | 0.283  | 0.918 | 1.32    | 0.624  | 0.943 |
| PF3D7_0719200 | 1.62    | 0.655  | 0.921 | -0.239  | 0.948  | 0.994 |
| PF3D7_1255200 | 0.396   | 0.371  | 0.918 | 0.191   | 0.735  | 0.957 |
| PF3D7_1034600 | -5.83   | 0.298  | 0.918 | 6.17    | 0.277  | 0.919 |
| PF3D7_1133200 | -0.0723 | 0.881  | 0.978 | 0.365   | 0.62   | 0.942 |
| PF3D7_0501100 | 2.29    | 0.388  | 0.918 | 0.982   | 0.844  | 0.975 |
| PF3D7_1250900 | 0.931   | 0.631  | 0.919 | -0.5    | 0.8    | 0.965 |
| PF3D7_0504200 | 2.54    | 0.471  | 0.918 | 7.71    | 0.138  | 0.919 |
| PF3D7_0100300 | -5.74   | 0.209  | 0.918 | 6.78    | 0.143  | 0.919 |
| PF3D7_0222500 | 1.11    | 0.45   | 0.918 | -0.643  | 0.665  | 0.952 |
| PF3D7_0719000 | -2.2    | 0.0939 | 0.918 | 3.49    | 0.0404 | 0.919 |
| PF3D7_0424200 | -1.54   | 0.432  | 0.918 | 1.32    | 0.502  | 0.924 |
| PF3D7_1401200 | -0.75   | 0.774  | 0.943 | -0.0821 | 0.971  | 0.998 |
| PF3D7_0731200 | -0.981  | 0.107  | 0.918 | 0.935   | 0.427  | 0.919 |
| PF3D7_1403900 | 3.89    | 0.405  | 0.918 | 0.944   | 0.808  | 0.967 |
| PF3D7_1131600 | 0.685   | 0.548  | 0.918 | -0.704  | 0.767  | 0.962 |
| PF3D7_1147900 | 4.54    | 0.367  | 0.918 | 3.07    | 0.626  | 0.945 |
| PF3D7_0210100 | -3.3    | 0.523  | 0.918 | 2.22    | 0.591  | 0.935 |
| PF3D7_0413700 | -3.59   | 0.455  | 0.918 | -1.3    | 0.835  | 0.972 |
| PF3D7_1147800 | 9.03    | 0.164  | 0.918 | -9.07   | 0.146  | 0.919 |
| PF3D7_1028600 | 2.27    | 0.47   | 0.918 | -5.99   | 0.287  | 0.919 |
| PF3D7_0902900 | 5.83    | 0.122  | 0.918 | -3.09   | 0.36   | 0.919 |
| PF3D7_1010500 | 0.941   | 0.792  | 0.949 | -3.12   | 0.453  | 0.919 |
| PF3D7_1031500 | 2.23    | 0.285  | 0.918 | -1.2    | 0.492  | 0.921 |
| PF3D7_0806200 | 2.29    | 0.541  | 0.918 | -2.81   | 0.586  | 0.933 |
| PF3D7_0916400 | -1.19   | 0.362  | 0.918 | 1.09    | 0.533  | 0.924 |
| PF3D7_0415700 | 11.3    | 0.127  | 0.918 | -6.79   | 0.0932 | 0.919 |
| PF3D7_1018000 | 2.82    | 0.442  | 0.918 | -1.25   | 0.598  | 0.936 |
| PF3D7_0222100 | 0.0773  | 0.979  | 0.997 | 1.95    | 0.551  | 0.924 |
| PF3D7_1002200 | -7.92   | 0.17   | 0.918 | 6.54    | 0.206  | 0.919 |
| PF08_0032     | -8.22   | 0.227  | 0.918 | 9.8     | 0.169  | 0.919 |
| PF3D7_0532900 | 2.22    | 0.438  | 0.918 | -3.78   | 0.348  | 0.919 |
| PF3D7_1466400 | -2.81   | 0.195  | 0.918 | 1.38    | 0.457  | 0.919 |
| PF3D7_0812400 | -0.781  | 0.425  | 0.918 | 1.24    | 0.522  | 0.924 |
| PF3D7_1319100 | -5.02   | 0.197  | 0.918 | 3.9     | 0.436  | 0.919 |

|               |        |       |       |        |        |       |
|---------------|--------|-------|-------|--------|--------|-------|
| PF3D7_0805400 | 1.06   | 0.809 | 0.953 | 3.22   | 0.334  | 0.919 |
| PF3D7_1455600 | 2.33   | 0.46  | 0.918 | -1.62  | 0.589  | 0.935 |
| PF3D7_0920300 | 0.158  | 0.942 | 0.989 | 0.327  | 0.873  | 0.981 |
| PF3D7_1454900 | 1.14   | 0.731 | 0.937 | 0.344  | 0.907  | 0.984 |
| PF3D7_0819100 | -0.136 | 0.959 | 0.992 | -2.46  | 0.578  | 0.933 |
| PF3D7_1404500 | -2.85  | 0.472 | 0.918 | 5.57   | 0.254  | 0.919 |
| PF3D7_0528500 | -7.04  | 0.371 | 0.918 | 6.88   | 0.365  | 0.919 |
| PF3D7_0109700 | -2.05  | 0.577 | 0.918 | 0.0419 | 0.993  | 0.998 |
| PF3D7_1135800 | 3.34   | 0.376 | 0.918 | -3.07  | 0.398  | 0.919 |
| PF3D7_1338700 | -7.36  | 0.207 | 0.918 | 3.25   | 0.529  | 0.924 |
| PF3D7_0723300 | -1.63  | 0.644 | 0.919 | -0.524 | 0.9    | 0.984 |
| PF3D7_0504400 | 1.71   | 0.575 | 0.918 | 1.32   | 0.72   | 0.957 |
| PF3D7_1410900 | -4.74  | 0.309 | 0.918 | 5.72   | 0.306  | 0.919 |
| PF3D7_1028400 | -5.12  | 0.244 | 0.918 | 8.35   | 0.0908 | 0.919 |
| PF3D7_1353100 | -1.22  | 0.579 | 0.918 | 1.71   | 0.375  | 0.919 |
| PF3D7_1021000 | -3.28  | 0.395 | 0.918 | 4.11   | 0.321  | 0.919 |
| PF3D7_0930600 | -0.427 | 0.664 | 0.922 | -0.899 | 0.345  | 0.919 |
| PF3D7_1222800 | 0.276  | 0.745 | 0.94  | -0.981 | 0.387  | 0.919 |
| PF3D7_1137400 | 0.469  | 0.919 | 0.984 | -0.69  | 0.871  | 0.981 |
| PF3D7_1235800 | 0.537  | 0.515 | 0.918 | 1      | 0.465  | 0.919 |
| PF3D7_1133800 | 0.839  | 0.63  | 0.919 | -0.675 | 0.683  | 0.954 |
| PF3D7_0425000 | -1.49  | 0.718 | 0.936 | 0.804  | 0.851  | 0.977 |
| PF3D7_0109000 | 1.74   | 0.661 | 0.921 | 1.06   | 0.743  | 0.958 |
| PF3D7_1144500 | -7.7   | 0.249 | 0.918 | 9.21   | 0.127  | 0.919 |
| PF3D7_0520400 | -0.498 | 0.838 | 0.962 | 2.5    | 0.353  | 0.919 |
| PF3D7_1131300 | -1.68  | 0.426 | 0.918 | 4.14   | 0.231  | 0.919 |
| PF3D7_0619500 | 0.542  | 0.731 | 0.937 | -0.279 | 0.891  | 0.982 |
| PFC10_API0027 | 14.3   | 0.15  | 0.918 | -1.06  | 0.841  | 0.975 |
| PF3D7_0403700 | 0.15   | 0.96  | 0.992 | -0.448 | 0.881  | 0.981 |
| PF3D7_1205000 | -0.381 | 0.864 | 0.972 | 1.33   | 0.548  | 0.924 |
| PF3D7_0405800 | -1.53  | 0.468 | 0.918 | 2.88   | 0.574  | 0.933 |
| PF3D7_1111000 | -0.21  | 0.88  | 0.978 | 1.6    | 0.2    | 0.919 |
| PF3D7_1302000 | -4.45  | 0.279 | 0.918 | 5.4    | 0.259  | 0.919 |
| PF3D7_1416100 | -1.6   | 0.734 | 0.937 | 2.35   | 0.735  | 0.957 |
| PF3D7_1020000 | 1.71   | 0.49  | 0.918 | -0.393 | 0.835  | 0.972 |
| PF3D7_1400200 | -1.91  | 0.32  | 0.918 | 4.51   | 0.17   | 0.919 |
| PF3D7_0629800 | 4.8    | 0.252 | 0.918 | -4.12  | 0.358  | 0.919 |
| PF3D7_0632300 | -0.524 | 0.585 | 0.918 | 1.34   | 0.262  | 0.919 |
| PF3D7_1030400 | 2.08   | 0.377 | 0.918 | -0.809 | 0.695  | 0.954 |
| PF3D7_0315700 | -2.32  | 0.475 | 0.918 | -3.89  | 0.421  | 0.919 |
| PF3D7_0832400 | -4.07  | 0.534 | 0.918 | 4.08   | 0.519  | 0.924 |
| PF3D7_1027200 | 4.14   | 0.195 | 0.918 | -6.55  | 0.144  | 0.919 |
| PF3D7_0511800 | -0.599 | 0.749 | 0.94  | 0.502  | 0.848  | 0.976 |
| PF3D7_1330500 | -2.12  | 0.458 | 0.918 | 1.14   | 0.696  | 0.954 |
| PF3D7_1337700 | -2.1   | 0.225 | 0.918 | 6.9    | 0.111  | 0.919 |
| PF3D7_1416200 | -0.116 | 0.914 | 0.984 | -0.132 | 0.864  | 0.981 |
| PF3D7_0206700 | -0.271 | 0.939 | 0.989 | 3.23   | 0.245  | 0.919 |

|               |        |        |       |        |        |       |
|---------------|--------|--------|-------|--------|--------|-------|
| PF3D7_0706300 | 2.95   | 0.383  | 0.918 | -6.76  | 0.276  | 0.919 |
| PF3D7_0607600 | -0.114 | 0.873  | 0.976 | -0.068 | 0.94   | 0.994 |
| PF3D7_1439100 | 3.28   | 0.359  | 0.918 | -2.84  | 0.425  | 0.919 |
| PF3D7_0528700 | -0.32  | 0.786  | 0.948 | 1.32   | 0.341  | 0.919 |
| PF3D7_1323900 | -12.7  | 0.0922 | 0.918 | 12.1   | 0.109  | 0.919 |
| PF3D7_0518700 | -2.38  | 0.334  | 0.918 | 5.97   | 0.196  | 0.919 |
| PF3D7_1247800 | 3.03   | 0.468  | 0.918 | 0.0234 | 0.995  | 0.999 |
| PF3D7_1419200 | 1.15   | 0.647  | 0.919 | -0.451 | 0.828  | 0.97  |
| PF3D7_1212100 | 1.15   | 0.729  | 0.937 | -0.521 | 0.887  | 0.982 |
| PF3D7_0508700 | -2.56  | 0.56   | 0.918 | 2.99   | 0.537  | 0.924 |
| PF3D7_0313300 | 3.18   | 0.271  | 0.918 | 0.324  | 0.849  | 0.976 |
| PF3D7_1407700 | 5.12   | 0.301  | 0.918 | -2.28  | 0.585  | 0.933 |
| PF3D7_0727200 | -1.46  | 0.354  | 0.918 | 1.13   | 0.539  | 0.924 |
| PF3D7_1148900 | -25    | 0.0856 | 0.918 | 23.7   | 0.0756 | 0.919 |
| PF3D7_0604700 | -10.9  | 0.0373 | 0.918 | 1.9    | 0.57   | 0.931 |
| PF3D7_1340100 | -5.48  | 0.224  | 0.918 | 6.44   | 0.0642 | 0.919 |
| PF3D7_1443700 | 3.01   | 0.352  | 0.918 | -0.362 | 0.899  | 0.983 |
| PF3D7_1238000 | 2.61   | 0.435  | 0.918 | 1.26   | 0.667  | 0.953 |
| PF3D7_0313600 | -1.16  | 0.703  | 0.931 | 2.9    | 0.4    | 0.919 |
| PF3D7_0910000 | -1.64  | 0.231  | 0.918 | 1.55   | 0.414  | 0.919 |
| PF3D7_1436000 | 0.996  | 0.318  | 0.918 | 4.17   | 0.157  | 0.919 |
| PF3D7_0423500 | -10.8  | 0.0791 | 0.918 | 18     | 0.0538 | 0.919 |
| PF3D7_1140800 | -3.61  | 0.116  | 0.918 | 3.07   | 0.218  | 0.919 |
| PF3D7_1308900 | 1.75   | 0.454  | 0.918 | -1.43  | 0.527  | 0.924 |
| PF3D7_1149800 | -9.84  | 0.133  | 0.918 | 7.95   | 0.207  | 0.919 |
| PF3D7_0933400 | 0.71   | 0.866  | 0.972 | 2.86   | 0.53   | 0.924 |
| PF3D7_0800400 | -1.63  | 0.55   | 0.918 | 1.4    | 0.614  | 0.942 |
| PF3D7_0314500 | -0.215 | 0.702  | 0.931 | 0.318  | 0.832  | 0.972 |
| PF3D7_0705100 | 5.47   | 0.183  | 0.918 | -1.41  | 0.641  | 0.95  |
| PF3D7_0923400 | -1.7   | 0.66   | 0.921 | -1.64  | 0.746  | 0.959 |
| PF3D7_0826700 | -0.657 | 0.788  | 0.948 | 1.19   | 0.621  | 0.942 |
| PF3D7_1437400 | -1.02  | 0.635  | 0.919 | 0.606  | 0.772  | 0.963 |
| PF3D7_0524400 | -1.09  | 0.734  | 0.937 | 1.19   | 0.732  | 0.957 |
| PF3D7_1312000 | -0.93  | 0.76   | 0.941 | 2.6    | 0.452  | 0.919 |
| PF3D7_1324100 | -7.41  | 0.0843 | 0.918 | 6.35   | 0.137  | 0.919 |
| PF3D7_1245600 | -10.5  | 0.126  | 0.918 | 3.94   | 0.533  | 0.924 |
| PF3D7_0726300 | -5.73  | 0.231  | 0.918 | 6.15   | 0.122  | 0.919 |
| PF3D7_1414600 | -3.61  | 0.238  | 0.918 | 3.67   | 0.206  | 0.919 |
| PF3D7_1216400 | -4.42  | 0.307  | 0.918 | 5.46   | 0.274  | 0.919 |
| PF3D7_1011100 | 12     | 0.0683 | 0.918 | -9.98  | 0.122  | 0.919 |
| PF3D7_1448500 | -1.78  | 0.615  | 0.919 | 14     | 0.0928 | 0.919 |
| PF3D7_1411100 | -0.63  | 0.695  | 0.93  | 0.656  | 0.845  | 0.975 |
| PF3D7_1468800 | -0.695 | 0.842  | 0.962 | -0.203 | 0.962  | 0.995 |
| PF3D7_1443000 | 0.778  | 0.749  | 0.94  | -1.83  | 0.505  | 0.924 |
| PF3D7_1126000 | -2.17  | 0.479  | 0.918 | 3.87   | 0.228  | 0.919 |
| PF3D7_0804400 | -4.42  | 0.377  | 0.918 | 6.4    | 0.214  | 0.919 |
| PF3D7_0820000 | -1.65  | 0.378  | 0.918 | 4.53   | 0.362  | 0.919 |

|               |        |        |       |          |        |       |
|---------------|--------|--------|-------|----------|--------|-------|
| PF3D7_1237900 | 2.38   | 0.394  | 0.918 | -2.31    | 0.411  | 0.919 |
| PF3D7_0816500 | -3.46  | 0.361  | 0.918 | 6.52     | 0.139  | 0.919 |
| PF3D7_1347600 | 3.69   | 0.179  | 0.918 | 3.82     | 0.297  | 0.919 |
| PF3D7_1244200 | 1.87   | 0.341  | 0.918 | -1.76    | 0.464  | 0.919 |
| PF3D7_1013200 | 0.136  | 0.963  | 0.993 | -0.141   | 0.962  | 0.995 |
| PF3D7_0729100 | 1.26   | 0.727  | 0.937 | -1.39    | 0.753  | 0.961 |
| PF3D7_0507100 | 0.407  | 0.904  | 0.98  | -2.35    | 0.608  | 0.94  |
| PF3D7_1416400 | -0.77  | 0.74   | 0.938 | -1.43    | 0.742  | 0.958 |
| PF3D7_1339700 | 7.73   | 0.119  | 0.918 | -9.68    | 0.0925 | 0.919 |
| PF3D7_1132400 | 0.665  | 0.836  | 0.961 | -0.198   | 0.95   | 0.994 |
| PF3D7_1366300 | -2.54  | 0.419  | 0.918 | 3.97     | 0.267  | 0.919 |
| PF3D7_1104800 | 4.28   | 0.278  | 0.918 | 0.188    | 0.954  | 0.994 |
| PF3D7_0209600 | -3.99  | 0.282  | 0.918 | 4.87     | 0.363  | 0.919 |
| PF3D7_1127400 | 1.51   | 0.362  | 0.918 | -0.00273 | 0.999  | 1     |
| PF3D7_0930400 | 3.76   | 0.436  | 0.918 | -1.26    | 0.837  | 0.973 |
| PF3D7_1217700 | -4.88  | 0.0987 | 0.918 | 13.5     | 0.0585 | 0.919 |
| PF3D7_0702100 | -3.58  | 0.323  | 0.918 | 4.48     | 0.219  | 0.919 |
| PF3D7_1439300 | -2.4   | 0.555  | 0.918 | 1.1      | 0.762  | 0.962 |
| PF3D7_1144200 | -4.26  | 0.347  | 0.918 | 3.9      | 0.394  | 0.919 |
| PF3D7_1105700 | -3.71  | 0.301  | 0.918 | 6.8      | 0.0845 | 0.919 |
| PF3D7_0917300 | -3.14  | 0.507  | 0.918 | 5.85     | 0.187  | 0.919 |
| PF3D7_1459700 | 1.41   | 0.492  | 0.918 | 1.22     | 0.737  | 0.957 |
| PF3D7_1408800 | -0.217 | 0.757  | 0.941 | 3.33     | 0.479  | 0.92  |
| PF3D7_1365200 | 3.68   | 0.439  | 0.918 | -0.828   | 0.858  | 0.978 |
| PF3D7_0407400 | 3.69   | 0.411  | 0.918 | -4.69    | 0.331  | 0.919 |
| PF3D7_1142200 | -0.9   | 0.769  | 0.942 | 0.537    | 0.864  | 0.981 |
| PF3D7_0531200 | 2.8    | 0.519  | 0.918 | -3.61    | 0.434  | 0.919 |
| PF3D7_0532600 | -0.14  | 0.926  | 0.986 | 1.6      | 0.546  | 0.924 |
| PFE0565w      | -3.03  | 0.219  | 0.918 | 3.35     | 0.195  | 0.919 |
| PF3D7_0722300 | -0.748 | 0.741  | 0.938 | 1.61     | 0.528  | 0.924 |
| PF3D7_0907700 | -4.02  | 0.151  | 0.918 | 4.99     | 0.0731 | 0.919 |
| PF3D7_1365400 | -13.7  | 0.0755 | 0.918 | 12.5     | 0.0844 | 0.919 |
| PFL0065w      | -7     | 0.0955 | 0.918 | 6.35     | 0.102  | 0.919 |
| PF3D7_0705200 | 1.78   | 0.249  | 0.918 | -1.07    | 0.492  | 0.921 |
| PF3D7_0311500 | 2.21   | 0.548  | 0.918 | -2.19    | 0.558  | 0.927 |
| PF3D7_0206000 | 12.6   | 0.118  | 0.918 | -9.45    | 0.167  | 0.919 |
| PF3D7_1307600 | 0.306  | 0.932  | 0.987 | 1.76     | 0.666  | 0.952 |
| PF3D7_0910300 | 2.27   | 0.443  | 0.918 | -1.72    | 0.608  | 0.94  |
| PF3D7_1334400 | -1.28  | 0.678  | 0.923 | 3.1      | 0.339  | 0.919 |
| PF3D7_1348400 | -1.12  | 0.288  | 0.918 | 1.4      | 0.203  | 0.919 |
| PF3D7_1214200 | -2.35  | 0.464  | 0.918 | 3.44     | 0.373  | 0.919 |
| PF3D7_0718800 | -0.789 | 0.568  | 0.918 | 3.38     | 0.332  | 0.919 |
| PF3D7_1100400 | 0.342  | 0.713  | 0.934 | 0.229    | 0.853  | 0.977 |
| PF3D7_0817100 | 0.932  | 0.777  | 0.943 | -4.01    | 0.325  | 0.919 |
| PF3D7_1320500 | 0.478  | 0.899  | 0.98  | -2.09    | 0.64   | 0.95  |
| PF3D7_0613300 | -1.09  | 0.408  | 0.918 | 1.04     | 0.479  | 0.92  |
| PF3D7_0300700 | 0.571  | 0.406  | 0.918 | -0.959   | 0.41   | 0.919 |

|               |         |        |       |        |        |       |
|---------------|---------|--------|-------|--------|--------|-------|
| PF3D7_1103600 | -0.687  | 0.577  | 0.918 | 1.35   | 0.518  | 0.924 |
| PF3D7_0732300 | 5.3     | 0.131  | 0.918 | -4.25  | 0.18   | 0.919 |
| PF3D7_0200200 | -5.96   | 0.187  | 0.918 | 5.39   | 0.196  | 0.919 |
| PF3D7_1023100 | -0.282  | 0.781  | 0.945 | 0.938  | 0.361  | 0.919 |
| PF3D7_0732700 | 1.38    | 0.437  | 0.918 | -1.22  | 0.501  | 0.924 |
| PF3D7_1102800 | 0.877   | 0.661  | 0.921 | -0.23  | 0.913  | 0.986 |
| PF3D7_1309400 | -0.156  | 0.755  | 0.941 | 0.547  | 0.604  | 0.937 |
| PF3D7_1041300 | 0.4     | 0.443  | 0.918 | -1.26  | 0.298  | 0.919 |
| PF3D7_1216500 | -1.17   | 0.457  | 0.918 | 2.92   | 0.205  | 0.919 |
| PF3D7_1200300 | 0.308   | 0.905  | 0.98  | 4.11   | 0.293  | 0.919 |
| PF3D7_1417400 | -0.993  | 0.359  | 0.918 | 0.181  | 0.925  | 0.989 |
| PF3D7_1348000 | -5.12   | 0.1    | 0.918 | 5.84   | 0.0827 | 0.919 |
| PF3D7_0819500 | -2.64   | 0.574  | 0.918 | 2.69   | 0.575  | 0.933 |
| PF3D7_1116600 | -5.99   | 0.125  | 0.918 | 0.657  | 0.894  | 0.982 |
| PF3D7_0710500 | 2.97    | 0.352  | 0.918 | 0.609  | 0.871  | 0.981 |
| PF3D7_0631100 | -8.05   | 0.187  | 0.918 | 7.24   | 0.199  | 0.919 |
| PF3D7_0803000 | -2.1    | 0.396  | 0.918 | 1.44   | 0.594  | 0.936 |
| PF3D7_1142400 | 0.434   | 0.78   | 0.945 | -1.07  | 0.518  | 0.924 |
| PF3D7_1233700 | -6.12   | 0.481  | 0.918 | 4.83   | 0.585  | 0.933 |
| PF3D7_0732000 | 0.371   | 0.628  | 0.919 | 0.28   | 0.774  | 0.963 |
| PF3D7_0724200 | 2.13    | 0.499  | 0.918 | -1.03  | 0.703  | 0.954 |
| PF3D7_1210500 | -1.55   | 0.639  | 0.919 | 1.82   | 0.589  | 0.935 |
| PF3D7_1113200 | -12.1   | 0.0645 | 0.918 | 11.3   | 0.07   | 0.919 |
| PF3D7_0601600 | -15.4   | 0.113  | 0.918 | 15.3   | 0.11   | 0.919 |
| PF3D7_0306900 | -1.3    | 0.718  | 0.936 | -1.93  | 0.586  | 0.933 |
| PF3D7_1018100 | 0.315   | 0.961  | 0.992 | -1.9   | 0.715  | 0.957 |
| PF3D7_0626100 | 3.79    | 0.361  | 0.918 | -2.61  | 0.506  | 0.924 |
| PF3D7_1010300 | -0.664  | 0.752  | 0.94  | -0.409 | 0.916  | 0.987 |
| PF3D7_1005000 | -8.75   | 0.2    | 0.918 | 10.8   | 0.152  | 0.919 |
| PF3D7_0425100 | -1.54   | 0.173  | 0.918 | 2.4    | 0.118  | 0.919 |
| PF3D7_0611000 | -0.0787 | 0.958  | 0.992 | -0.827 | 0.612  | 0.942 |
| PF3D7_0713900 | -0.143  | 0.699  | 0.931 | 0.483  | 0.465  | 0.919 |
| PF3D7_0213100 | -4.48   | 0.347  | 0.918 | 3.37   | 0.471  | 0.919 |
| PF3D7_0423700 | -6.4    | 0.0859 | 0.918 | 6.03   | 0.093  | 0.919 |
| PF3D7_1108500 | 0.253   | 0.945  | 0.99  | 0.822  | 0.849  | 0.976 |
| PF3D7_0618600 | 1.68    | 0.429  | 0.918 | 1.19   | 0.665  | 0.952 |
| PF3D7_1021400 | 3.78    | 0.33   | 0.918 | 0.488  | 0.875  | 0.981 |
| PF3D7_1203600 | 2.89    | 0.587  | 0.918 | -1.34  | 0.792  | 0.965 |
| PF3D7_1354800 | -5.67   | 0.231  | 0.918 | -2.82  | 0.659  | 0.95  |
| PF3D7_1445900 | -1.27   | 0.682  | 0.925 | 3.5    | 0.34   | 0.919 |
| PF3D7_1447100 | -4.23   | 0.337  | 0.918 | 5.11   | 0.39   | 0.919 |
| PF3D7_1367700 | 0.126   | 0.803  | 0.953 | -0.161 | 0.805  | 0.966 |
| PF3D7_0421100 | -0.944  | 0.638  | 0.919 | 0.904  | 0.784  | 0.963 |
| PF3D7_1316000 | -3.01   | 0.594  | 0.918 | 2.44   | 0.66   | 0.95  |
| PF3D7_1105800 | 0.0845  | 0.98   | 0.997 | 2.46   | 0.57   | 0.931 |
| PF3D7_0903500 | -0.234  | 0.885  | 0.979 | 1.51   | 0.366  | 0.919 |
| PF3D7_1306700 | -3.86   | 0.218  | 0.918 | 5.35   | 0.137  | 0.919 |

|               |         |        |       |        |        |       |
|---------------|---------|--------|-------|--------|--------|-------|
| PF3D7_1303900 | -2.21   | 0.629  | 0.919 | 0.424  | 0.919  | 0.988 |
| PF3D7_1310500 | 3.51    | 0.438  | 0.918 | -3.87  | 0.4    | 0.919 |
| PF3D7_1020700 | -0.0681 | 0.976  | 0.996 | 0.759  | 0.759  | 0.962 |
| PF13_0228     | -1.27   | 0.749  | 0.94  | 3.71   | 0.434  | 0.919 |
| PF3D7_1135000 | 1.54    | 0.252  | 0.918 | 1.02   | 0.525  | 0.924 |
| PF3D7_1246900 | -13     | 0.179  | 0.918 | 12.7   | 0.183  | 0.919 |
| PF3D7_0618200 | -5.27   | 0.185  | 0.918 | 5.76   | 0.12   | 0.919 |
| PF3D7_0605700 | -6.49   | 0.176  | 0.918 | 5.11   | 0.281  | 0.919 |
| PF3D7_0519300 | 3.74    | 0.241  | 0.918 | -4.42  | 0.153  | 0.919 |
| PF3D7_1359000 | -0.296  | 0.563  | 0.918 | 0.399  | 0.723  | 0.957 |
| PF3D7_1305300 | 0.691   | 0.747  | 0.94  | -1.11  | 0.615  | 0.942 |
| PF3D7_0901600 | -1.01   | 0.59   | 0.918 | 1.81   | 0.361  | 0.919 |
| PF3D7_1147300 | 0.681   | 0.799  | 0.953 | 1.1    | 0.696  | 0.954 |
| PF3D7_1358100 | -5.79   | 0.245  | 0.918 | 3.27   | 0.476  | 0.919 |
| PF3D7_1309900 | 6.28    | 0.297  | 0.918 | -7.54  | 0.212  | 0.919 |
| PF3D7_0422600 | -3.25   | 0.153  | 0.918 | 1.67   | 0.567  | 0.931 |
| PF3D7_0609300 | -1.05   | 0.796  | 0.952 | 1.45   | 0.709  | 0.955 |
| PF3D7_1473000 | 1.8     | 0.293  | 0.918 | -1.77  | 0.323  | 0.919 |
| PF3D7_0513100 | 12.9    | 0.213  | 0.918 | 14.1   | 0.206  | 0.919 |
| PF3D7_1416000 | -0.563  | 0.865  | 0.972 | 3.48   | 0.367  | 0.919 |
| PF3D7_1014000 | 0.633   | 0.547  | 0.918 | -0.32  | 0.79   | 0.965 |
| PF3D7_0508100 | -5.9    | 0.0789 | 0.918 | 12.1   | 0.0513 | 0.919 |
| PF3D7_0811900 | -6.53   | 0.338  | 0.918 | 7.27   | 0.289  | 0.919 |
| PF3D7_1122600 | -2.81   | 0.631  | 0.919 | 13.3   | 0.0879 | 0.919 |
| PF3D7_0111800 | 4.08    | 0.292  | 0.918 | -3.67  | 0.355  | 0.919 |
| PF3D7_0302900 | -0.0611 | 0.884  | 0.979 | -0.256 | 0.802  | 0.965 |
| PF3D7_1366500 | 0.988   | 0.539  | 0.918 | -0.528 | 0.782  | 0.963 |
| PF3D7_1225700 | 1.77    | 0.364  | 0.918 | -0.112 | 0.965  | 0.996 |
| PF3D7_0931400 | 1.2     | 0.8    | 0.953 | -4.41  | 0.263  | 0.919 |
| PF3D7_0518200 | -1.7    | 0.47   | 0.918 | 0.876  | 0.665  | 0.952 |
| PF3D7_0805500 | -1.08   | 0.738  | 0.938 | 1.29   | 0.731  | 0.957 |
| PF3D7_0619100 | 3.37    | 0.432  | 0.918 | -2.51  | 0.556  | 0.927 |
| PF3D7_0505600 | -4.96   | 0.239  | 0.918 | 1.63   | 0.622  | 0.942 |
| PF3D7_0927100 | -0.067  | 0.981  | 0.997 | 0.135  | 0.927  | 0.989 |
| PF3D7_0906300 | -0.0538 | 0.942  | 0.989 | 1.12   | 0.33   | 0.919 |
| mal_mito_2    | 5.86    | 0.123  | 0.918 | 4.42   | 0.266  | 0.919 |
| PF3D7_1415400 | -5.33   | 0.467  | 0.918 | 5.04   | 0.49   | 0.921 |
| PF3D7_1236600 | -1.55   | 0.506  | 0.918 | 0.151  | 0.959  | 0.994 |
| PF3D7_1449600 | -1.57   | 0.581  | 0.918 | 0.307  | 0.924  | 0.989 |
| PF3D7_1121100 | -2.03   | 0.484  | 0.918 | 2.11   | 0.484  | 0.92  |
| PF3D7_0606800 | -0.516  | 0.842  | 0.963 | 2.07   | 0.372  | 0.919 |
| PF3D7_0318800 | 2.37    | 0.533  | 0.918 | -2.88  | 0.428  | 0.919 |
| PF3D7_1038800 | -5.07   | 0.293  | 0.918 | 1.78   | 0.705  | 0.954 |
| PF3D7_1220600 | -0.673  | 0.843  | 0.963 | -0.178 | 0.966  | 0.997 |
| PF3D7_1252200 | -0.466  | 0.75   | 0.94  | 0.686  | 0.647  | 0.95  |
| PF3D7_1220900 | -4.2    | 0.158  | 0.918 | 2.51   | 0.439  | 0.919 |
| PF3D7_1433200 | -1.22   | 0.297  | 0.918 | 2.88   | 0.148  | 0.919 |

|               |        |        |       |        |        |       |
|---------------|--------|--------|-------|--------|--------|-------|
| PF3D7_0615000 | -3.4   | 0.3    | 0.918 | 1.55   | 0.655  | 0.95  |
| PF3D7_0205000 | -2.28  | 0.604  | 0.918 | 1.6    | 0.721  | 0.957 |
| PF3D7_1202300 | 0.232  | 0.656  | 0.921 | 1.17   | 0.0921 | 0.919 |
| PF3D7_1467200 | -1.58  | 0.614  | 0.919 | 0.973  | 0.728  | 0.957 |
| PF3D7_0503400 | -2.44  | 0.519  | 0.918 | 2.63   | 0.422  | 0.919 |
| PF3D7_1142700 | 0.0351 | 0.994  | 0.999 | 0.606  | 0.886  | 0.981 |
| PF3D7_1436600 | -3.92  | 0.198  | 0.918 | 3.61   | 0.204  | 0.919 |
| PF3D7_1340500 | 1.24   | 0.599  | 0.918 | 1.06   | 0.599  | 0.936 |
| PF3D7_0423600 | -1.05  | 0.466  | 0.918 | 1.67   | 0.307  | 0.919 |
| PF3D7_0501400 | 1.02   | 0.741  | 0.938 | 1.87   | 0.589  | 0.935 |
| PF3D7_0301300 | -5.4   | 0.0948 | 0.918 | -0.617 | 0.818  | 0.968 |
| PF3D7_0315000 | 2.56   | 0.46   | 0.918 | -3.5   | 0.247  | 0.919 |
| PF3D7_1117200 | -0.713 | 0.902  | 0.98  | 1.12   | 0.846  | 0.975 |
| PF3D7_1252500 | -1.92  | 0.51   | 0.918 | 1.75   | 0.559  | 0.927 |
| PF3D7_1305500 | 4.01   | 0.301  | 0.918 | 4.22   | 0.249  | 0.919 |
| PF3D7_0114200 | -1.21  | 0.754  | 0.94  | 2.07   | 0.596  | 0.936 |
| PF3D7_1205100 | -2.38  | 0.493  | 0.918 | -3.23  | 0.399  | 0.919 |
| PF3D7_1016100 | 15.6   | 0.0861 | 0.918 | -9.26  | 0.176  | 0.919 |
| PF3D7_1009300 | -3.26  | 0.625  | 0.919 | 3.65   | 0.58   | 0.933 |
| PF3D7_1134500 | 0.0155 | 0.995  | 0.999 | 1.72   | 0.438  | 0.919 |
| PF3D7_0904800 | 4.82   | 0.276  | 0.918 | -5.94  | 0.195  | 0.919 |
| PF3D7_1253400 | 6.81   | 0.207  | 0.918 | -5.3   | 0.293  | 0.919 |
| PF13_0201     | 1.39   | 0.559  | 0.918 | -0.618 | 0.755  | 0.962 |
| PF3D7_0812220 | -12.1  | 0.116  | 0.918 | 12.5   | 0.112  | 0.919 |
| PF3D7_0814600 | -3     | 0.415  | 0.918 | 7.51   | 0.0831 | 0.919 |
| PF3D7_1244800 | 3.12   | 0.562  | 0.918 | -3.39  | 0.592  | 0.936 |
| PF3D7_0716600 | -2.39  | 0.554  | 0.918 | 4.81   | 0.271  | 0.919 |
| PF3D7_0912700 | 2.06   | 0.518  | 0.918 | -2.96  | 0.44   | 0.919 |
| PF3D7_1218200 | -6.36  | 0.282  | 0.918 | 22     | 0.156  | 0.919 |
| PF3D7_1244700 | 1.24   | 0.441  | 0.918 | 0.614  | 0.809  | 0.967 |
| PF3D7_1150200 | -0.231 | 0.9    | 0.98  | 1.42   | 0.57   | 0.931 |
| PF3D7_1327600 | 5.1    | 0.225  | 0.918 | -0.252 | 0.927  | 0.989 |
| PF3D7_0416600 | 1.81   | 0.365  | 0.918 | -0.264 | 0.855  | 0.978 |
| PF3D7_1454700 | 1.95   | 0.702  | 0.931 | -3.02  | 0.418  | 0.919 |
| PF3D7_0632700 | 0.461  | 0.889  | 0.979 | -1.17  | 0.73   | 0.957 |
| PF3D7_1254400 | -2.99  | 0.253  | 0.918 | 3.67   | 0.182  | 0.919 |
| PF3D7_1119400 | -0.869 | 0.398  | 0.918 | 1.51   | 0.425  | 0.919 |
| PF3D7_1456100 | 5.43   | 0.326  | 0.918 | 1.51   | 0.748  | 0.959 |
| PF3D7_0804900 | -0.776 | 0.693  | 0.928 | 1.79   | 0.309  | 0.919 |
| PF3D7_1106700 | 0.794  | 0.849  | 0.965 | -0.842 | 0.834  | 0.972 |
| PF3D7_1137200 | -0.62  | 0.637  | 0.919 | -0.421 | 0.867  | 0.981 |
| PF3D7_0914700 | -5.71  | 0.158  | 0.918 | 11.1   | 0.0722 | 0.919 |
| PF3D7_0606000 | 0.231  | 0.807  | 0.953 | -0.874 | 0.485  | 0.92  |
| PF3D7_1036800 | -2.34  | 0.362  | 0.918 | 2.3    | 0.31   | 0.919 |
| PF3D7_0511900 | 1.82   | 0.628  | 0.919 | -1.85  | 0.621  | 0.942 |
| PF3D7_0412700 | 3.37   | 0.25   | 0.918 | -1.17  | 0.605  | 0.938 |
| PF3D7_1414500 | 0.779  | 0.458  | 0.918 | 1.05   | 0.658  | 0.95  |



|               |        |        |       |        |        |       |
|---------------|--------|--------|-------|--------|--------|-------|
| PF3D7_1329800 | 0.363  | 0.387  | 0.918 | 0.81   | 0.463  | 0.919 |
| PF3D7_0921900 | -0.257 | 0.867  | 0.972 | 2.12   | 0.313  | 0.919 |
| PF3D7_0516400 | 1.34   | 0.421  | 0.918 | 0.427  | 0.788  | 0.964 |
| PF3D7_0318200 | -0.306 | 0.841  | 0.962 | 2.05   | 0.296  | 0.919 |
| PF3D7_1450800 | 5.76   | 0.218  | 0.918 | -2.89  | 0.546  | 0.924 |
| PF3D7_1445100 | 1.73   | 0.0929 | 0.918 | 0.0202 | 0.986  | 0.998 |
| PF3D7_1140900 | -0.896 | 0.787  | 0.948 | 1.38   | 0.678  | 0.954 |
| PF3D7_0631800 | 0.467  | 0.475  | 0.918 | 0.246  | 0.765  | 0.962 |
| PF3D7_1239500 | -0.31  | 0.792  | 0.949 | 1.58   | 0.286  | 0.919 |
| PF3D7_0413600 | -1.46  | 0.728  | 0.937 | 1.96   | 0.611  | 0.942 |
| PF3D7_1358600 | 0.21   | 0.542  | 0.918 | 0.921  | 0.295  | 0.919 |
| PF3D7_0202700 | 0.962  | 0.411  | 0.918 | 0.378  | 0.784  | 0.963 |
| PF3D7_0503800 | 4.07   | 0.397  | 0.918 | -6.47  | 0.426  | 0.919 |
| PF3D7_0313500 | -17    | 0.0668 | 0.918 | 5.1    | 0.427  | 0.919 |
| PF3D7_0823500 | -1.7   | 0.443  | 0.918 | 3.22   | 0.193  | 0.919 |
| PF3D7_1347300 | -1.4   | 0.474  | 0.918 | 9.12   | 0.164  | 0.919 |
| PF3D7_1013900 | 4.91   | 0.223  | 0.918 | -1.42  | 0.663  | 0.952 |
| PF3D7_0527200 | 0.132  | 0.705  | 0.932 | 0.0953 | 0.9    | 0.984 |
| PF3D7_1466300 | 0.181  | 0.81   | 0.953 | 1.31   | 0.407  | 0.919 |
| PF3D7_1128700 | -35.4  | 0.153  | 0.918 | 36.4   | 0.137  | 0.919 |
| PF3D7_0616400 | 1.28   | 0.62   | 0.919 | -1.6   | 0.575  | 0.933 |
| PF3D7_1124200 | -1.03  | 0.45   | 0.918 | 2.25   | 0.257  | 0.919 |
| PF3D7_1371700 | -2.62  | 0.641  | 0.919 | 2.11   | 0.701  | 0.954 |
| PF3D7_1234300 | 0.974  | 0.413  | 0.918 | 5.11   | 0.252  | 0.919 |
| PF3D7_1462000 | 0.179  | 0.97   | 0.994 | -0.182 | 0.89   | 0.982 |
| PF3D7_1320200 | 0.0826 | 0.978  | 0.997 | 4.92   | 0.269  | 0.919 |
| PF3D7_0603600 | 6.75   | 0.181  | 0.918 | -9.22  | 0.0702 | 0.919 |
| PF3D7_0103700 | -2.37  | 0.354  | 0.918 | 5.41   | 0.279  | 0.919 |
| PF3D7_1438800 | -0.488 | 0.858  | 0.969 | -0.128 | 0.974  | 0.998 |
| PF3D7_1250400 | -1.33  | 0.711  | 0.933 | 3.91   | 0.373  | 0.919 |
| PF3D7_1242900 | -10.6  | 0.198  | 0.918 | 9.95   | 0.215  | 0.919 |
| PF3D7_1129600 | -3.87  | 0.278  | 0.918 | 5.97   | 0.128  | 0.919 |
| PF3D7_0202800 | 0.464  | 0.799  | 0.953 | -0.45  | 0.687  | 0.954 |
| PF3D7_1365800 | 3.13   | 0.363  | 0.918 | -2.2   | 0.506  | 0.924 |
| PF3D7_0204500 | -5.79  | 0.265  | 0.918 | 5.63   | 0.235  | 0.919 |
| PFC10_API0040 | 0.968  | 0.56   | 0.918 | 0.73   | 0.81   | 0.968 |
| PF3D7_1341800 | 3.19   | 0.477  | 0.918 | -2.09  | 0.651  | 0.95  |
| PF3D7_0508600 | -0.443 | 0.502  | 0.918 | 1.43   | 0.623  | 0.942 |
| PF3D7_0905900 | -0.993 | 0.413  | 0.918 | 7.35   | 0.149  | 0.919 |
| PF11_0314     | 8.73   | 0.254  | 0.918 | -3.49  | 0.566  | 0.931 |
| PF3D7_1452200 | 2.36   | 0.593  | 0.918 | -4.71  | 0.37   | 0.919 |
| PF3D7_1307900 | -5.27  | 0.0926 | 0.918 | 2.3    | 0.52   | 0.924 |
| PF3D7_1104900 | 0.627  | 0.682  | 0.925 | -2.34  | 0.36   | 0.919 |
| PF3D7_1315000 | 2.07   | 0.305  | 0.918 | -0.226 | 0.864  | 0.98  |
| PF3D7_1220700 | -1.95  | 0.562  | 0.918 | 1.09   | 0.814  | 0.968 |
| PF3D7_1248800 | 2.01   | 0.264  | 0.918 | 0.64   | 0.676  | 0.954 |
| PF3D7_1218700 | -1.71  | 0.282  | 0.918 | 2.44   | 0.352  | 0.919 |

|               |         |        |       |         |        |       |
|---------------|---------|--------|-------|---------|--------|-------|
| PF3D7_0622400 | 2.6     | 0.557  | 0.918 | -2.7    | 0.537  | 0.924 |
| PF3D7_1108700 | -3.74   | 0.26   | 0.918 | 3.74    | 0.271  | 0.919 |
| PF3D7_0901100 | -0.784  | 0.622  | 0.919 | 3.28    | 0.24   | 0.919 |
| PF3D7_1366700 | -2.7    | 0.33   | 0.918 | 5.04    | 0.359  | 0.919 |
| PF3D7_1348200 | 5.63    | 0.293  | 0.918 | -5.75   | 0.284  | 0.919 |
| PF3D7_0709100 | 0.288   | 0.862  | 0.971 | 0.126   | 0.938  | 0.994 |
| PFL0300c      | 0.307   | 0.951  | 0.992 | 4.26    | 0.458  | 0.919 |
| PF3D7_0223200 | -0.851  | 0.588  | 0.918 | -0.554  | 0.781  | 0.963 |
| PF3D7_0106900 | 4.47    | 0.301  | 0.918 | -3.7    | 0.411  | 0.919 |
| PF3D7_1106800 | -1.55   | 0.443  | 0.918 | 3.06    | 0.44   | 0.919 |
| PF3D7_1223600 | -0.287  | 0.781  | 0.945 | 0.898   | 0.57   | 0.931 |
| PF3D7_0607900 | -5.54   | 0.24   | 0.918 | 2.43    | 0.643  | 0.95  |
| PF3D7_0818300 | -1.79   | 0.511  | 0.918 | 1.66    | 0.697  | 0.954 |
| PF3D7_1314200 | -1.65   | 0.529  | 0.918 | -0.285  | 0.906  | 0.984 |
| PF3D7_0708200 | -1.13   | 0.675  | 0.923 | -0.229  | 0.937  | 0.994 |
| PF3D7_0105600 | -2.23   | 0.202  | 0.918 | 6.67    | 0.071  | 0.919 |
| PF3D7_0811500 | -1.54   | 0.643  | 0.919 | 1.8     | 0.603  | 0.937 |
| PF3D7_1249900 | -11.3   | 0.0362 | 0.918 | 5.62    | 0.301  | 0.919 |
| PF3D7_1337300 | -2.7    | 0.169  | 0.918 | 2.6     | 0.218  | 0.919 |
| PF3D7_0109100 | -1.52   | 0.68   | 0.923 | 6.97    | 0.156  | 0.919 |
| PF3D7_1141800 | -0.177  | 0.924  | 0.985 | 2.81    | 0.511  | 0.924 |
| PF3D7_1035900 | -1.41   | 0.342  | 0.918 | 2.37    | 0.116  | 0.919 |
| PF3D7_0503500 | -1.27   | 0.658  | 0.921 | -4.79   | 0.357  | 0.919 |
| PF3D7_0515300 | 9.67    | 0.0661 | 0.918 | -8.52   | 0.0784 | 0.919 |
| PF3D7_1250200 | -0.848  | 0.839  | 0.962 | 0.142   | 0.981  | 0.998 |
| PF3D7_0825200 | 5.39    | 0.258  | 0.918 | 4.12    | 0.646  | 0.95  |
| PF3D7_0728300 | -1.03   | 0.677  | 0.923 | -0.905  | 0.567  | 0.931 |
| PF3D7_1354500 | -1.13   | 0.729  | 0.937 | 5.32    | 0.234  | 0.919 |
| PF3D7_1302700 | -0.163  | 0.82   | 0.955 | 0.919   | 0.357  | 0.919 |
| PF3D7_1203000 | 4.17    | 0.184  | 0.918 | -4.83   | 0.168  | 0.919 |
| PF3D7_0625900 | 2.79    | 0.54   | 0.918 | -2.17   | 0.652  | 0.95  |
| PF3D7_0623800 | -1.04   | 0.382  | 0.918 | 0.568   | 0.617  | 0.942 |
| PF3D7_0112200 | 2       | 0.301  | 0.918 | -1.08   | 0.545  | 0.924 |
| PF3D7_0508000 | 0.136   | 0.962  | 0.992 | 2.07    | 0.561  | 0.928 |
| PF3D7_1147500 | 1.05    | 0.719  | 0.937 | 2.09    | 0.684  | 0.954 |
| PF3D7_0503900 | -0.0373 | 0.916  | 0.984 | 0.562   | 0.472  | 0.919 |
| PF3D7_1345200 | -3.19   | 0.256  | 0.918 | 0.593   | 0.818  | 0.968 |
| PF3D7_1468400 | 7.28    | 0.109  | 0.918 | -3.67   | 0.272  | 0.919 |
| PF3D7_1341600 | 0.984   | 0.662  | 0.921 | -0.0155 | 0.994  | 0.998 |
| PF3D7_0303100 | -0.622  | 0.452  | 0.918 | 0.236   | 0.883  | 0.981 |
| PF3D7_1108300 | 2.88    | 0.409  | 0.918 | -7.46   | 0.195  | 0.919 |
| PF3D7_1464300 | 1.84    | 0.474  | 0.918 | -1.34   | 0.67   | 0.954 |
| PF3D7_0632000 | -2.26   | 0.519  | 0.918 | 3.27    | 0.521  | 0.924 |
| PF3D7_1326300 | -0.404  | 0.885  | 0.979 | 3.05    | 0.258  | 0.919 |
| PF3D7_0812900 | -0.882  | 0.841  | 0.962 | -0.203  | 0.962  | 0.995 |
| PF3D7_0815500 | 0.322   | 0.606  | 0.918 | 0.327   | 0.826  | 0.97  |
| PF3D7_0521200 | -4.16   | 0.271  | 0.918 | 4.43    | 0.224  | 0.919 |

|               |        |        |       |        |        |       |
|---------------|--------|--------|-------|--------|--------|-------|
| PF3D7_1439700 | 0.478  | 0.879  | 0.978 | 10.4   | 0.0651 | 0.919 |
| PF3D7_0304000 | -2.89  | 0.411  | 0.918 | 2.19   | 0.613  | 0.942 |
| PF3D7_1304100 | -3.57  | 0.349  | 0.918 | 3.27   | 0.346  | 0.919 |
| PF3D7_0824100 | 2.72   | 0.401  | 0.918 | -3.07  | 0.363  | 0.919 |
| PF3D7_0708400 | -4.59  | 0.0686 | 0.918 | 6.86   | 0.0641 | 0.919 |
| PF3D7_1007000 | 1.4    | 0.611  | 0.919 | -0.392 | 0.9    | 0.984 |
| PF3D7_0822800 | 3.31   | 0.323  | 0.918 | -3.31  | 0.231  | 0.919 |
| PF3D7_1440700 | 3.21   | 0.472  | 0.918 | -6.49  | 0.29   | 0.919 |
| PF3D7_0505500 | -0.33  | 0.897  | 0.98  | 4.07   | 0.157  | 0.919 |
| PF3D7_0405300 | -0.485 | 0.248  | 0.918 | 0.482  | 0.676  | 0.954 |
| PF3D7_1023000 | 1.32   | 0.515  | 0.918 | -1.6   | 0.436  | 0.919 |
| PF3D7_1408200 | 0.558  | 0.566  | 0.918 | -0.623 | 0.58   | 0.933 |
| PF3D7_0923700 | 2.84   | 0.33   | 0.918 | -5.01  | 0.174  | 0.919 |
| PF3D7_1229500 | 0.547  | 0.851  | 0.966 | -2.2   | 0.47   | 0.919 |
| PF3D7_1117400 | 2.13   | 0.373  | 0.918 | -3.56  | 0.281  | 0.919 |
| PF3D7_1129500 | 1.26   | 0.594  | 0.918 | -2.61  | 0.305  | 0.919 |
| PF3D7_0408500 | -9.89  | 0.0853 | 0.918 | 7.52   | 0.102  | 0.919 |
| PF3D7_1223200 | -10.8  | 0.0664 | 0.918 | 11.5   | 0.0944 | 0.919 |
| PF3D7_1477300 | 1.13   | 0.595  | 0.918 | 0.255  | 0.918  | 0.988 |
| PF3D7_1444600 | -0.994 | 0.809  | 0.953 | -0.383 | 0.821  | 0.968 |
| PF3D7_0215500 | -2.13  | 0.549  | 0.918 | -2.81  | 0.411  | 0.919 |
| PF3D7_0923600 | 2.39   | 0.379  | 0.918 | -1.88  | 0.446  | 0.919 |
| PF3D7_0937600 | 0.246  | 0.531  | 0.918 | 0.441  | 0.446  | 0.919 |
| PF3D7_0223300 | -0.208 | 0.783  | 0.946 | 0.771  | 0.412  | 0.919 |
| PF3D7_0702500 | -0.876 | 0.808  | 0.953 | 2.52   | 0.583  | 0.933 |
| PF3D7_1471700 | 0.991  | 0.386  | 0.918 | 2.06   | 0.453  | 0.919 |
| PF3D7_0310600 | -5.38  | 0.371  | 0.918 | 17.4   | 0.0604 | 0.919 |
| PF3D7_1462300 | 0.751  | 0.678  | 0.923 | 1.88   | 0.457  | 0.919 |
| PF3D7_1413700 | -0.242 | 0.871  | 0.975 | 1.05   | 0.779  | 0.963 |
| PF3D7_0320200 | -0.237 | 0.893  | 0.98  | 0.0624 | 0.971  | 0.998 |
| PF3D7_1119800 | -10.7  | 0.159  | 0.918 | 9.53   | 0.213  | 0.919 |
| PF3D7_1353300 | 0.666  | 0.557  | 0.918 | -0.328 | 0.774  | 0.963 |
| PF3D7_1026000 | -5.98  | 0.23   | 0.918 | 4.03   | 0.548  | 0.924 |
| PF3D7_0424700 | -1.03  | 0.554  | 0.918 | -0.879 | 0.864  | 0.98  |
| PF3D7_0425500 | -1.46  | 0.535  | 0.918 | 1.35   | 0.516  | 0.924 |
| PF3D7_0917000 | 0.69   | 0.306  | 0.918 | 0.217  | 0.743  | 0.958 |
| PF3D7_1123500 | -0.24  | 0.805  | 0.953 | 0.0643 | 0.941  | 0.994 |
| PF3D7_0704500 | -1.32  | 0.67   | 0.923 | 0.585  | 0.851  | 0.977 |
| PF3D7_1301400 | -4.12  | 0.191  | 0.918 | 1.61   | 0.599  | 0.936 |
| PF3D7_0517600 | 1.44   | 0.712  | 0.933 | 7.62   | 0.111  | 0.919 |
| PF3D7_1307400 | -7.75  | 0.112  | 0.918 | 6.49   | 0.114  | 0.919 |
| PF3D7_1032100 | -0.19  | 0.776  | 0.943 | 0.0964 | 0.912  | 0.986 |
| PF3D7_1230000 | -0.645 | 0.688  | 0.927 | 2.42   | 0.478  | 0.92  |
| PF3D7_0414700 | 4.16   | 0.0695 | 0.918 | -2.06  | 0.247  | 0.919 |
| PF3D7_1011600 | 6.13   | 0.213  | 0.918 | -3.81  | 0.292  | 0.919 |
| PF3D7_0815600 | -1.91  | 0.567  | 0.918 | 1.1    | 0.8    | 0.965 |
| PF3D7_0201600 | -2.5   | 0.383  | 0.918 | 4.95   | 0.122  | 0.919 |

|               |          |        |       |        |        |       |
|---------------|----------|--------|-------|--------|--------|-------|
| PF3D7_0103200 | -19.3    | 0.168  | 0.918 | 25.4   | 0.134  | 0.919 |
| PF3D7_1243400 | 2.75     | 0.403  | 0.918 | -2.67  | 0.387  | 0.919 |
| PF3D7_0805200 | -1.99    | 0.67   | 0.923 | 0.795  | 0.878  | 0.981 |
| PF3D7_1017600 | -2.87    | 0.522  | 0.918 | 2.68   | 0.509  | 0.924 |
| PFL0110c      | -4.01    | 0.248  | 0.918 | 6.17   | 0.0959 | 0.919 |
| PF3D7_1435300 | -0.273   | 0.902  | 0.98  | -0.741 | 0.719  | 0.957 |
| PF3D7_1123400 | -2.56    | 0.228  | 0.918 | 2.82   | 0.226  | 0.919 |
| PFC0555c      | -1.94    | 0.385  | 0.918 | 0.201  | 0.902  | 0.984 |
| PF3D7_0726400 | -1.68    | 0.359  | 0.918 | 2.39   | 0.275  | 0.919 |
| PF3D7_1466600 | -15.6    | 0.0901 | 0.918 | 13.9   | 0.104  | 0.919 |
| PF3D7_0731700 | 3.99     | 0.154  | 0.918 | -2.05  | 0.503  | 0.924 |
| PF3D7_1019200 | -14.2    | 0.0982 | 0.918 | 16.2   | 0.0921 | 0.919 |
| PF3D7_1125200 | -0.794   | 0.894  | 0.98  | 4.92   | 0.235  | 0.919 |
| PF3D7_0728400 | 2.38     | 0.644  | 0.919 | -1.93  | 0.796  | 0.965 |
| PF3D7_0602500 | -2.16    | 0.337  | 0.918 | 2.21   | 0.332  | 0.919 |
| PF3D7_1025500 | -3.41    | 0.154  | 0.918 | 2.61   | 0.399  | 0.919 |
| PFE0795c      | 1.09     | 0.811  | 0.953 | 5.47   | 0.202  | 0.919 |
| PF3D7_0930900 | -9.72    | 0.117  | 0.918 | 9.11   | 0.112  | 0.919 |
| PF3D7_0206600 | -1.06    | 0.543  | 0.918 | -0.458 | 0.904  | 0.984 |
| PF3D7_1205200 | -2.81    | 0.265  | 0.918 | 2.43   | 0.433  | 0.919 |
| PF3D7_0613600 | -0.819   | 0.738  | 0.938 | 1.64   | 0.568  | 0.931 |
| PF3D7_1328600 | 2.02     | 0.677  | 0.923 | -0.355 | 0.941  | 0.994 |
| PF3D7_1105400 | -0.399   | 0.925  | 0.985 | 1.91   | 0.477  | 0.919 |
| PF3D7_0713000 | -5.83    | 0.166  | 0.918 | 7.64   | 0.185  | 0.919 |
| PF3D7_0922300 | 0.628    | 0.619  | 0.919 | -0.683 | 0.711  | 0.957 |
| PF3D7_1359400 | -4.68    | 0.391  | 0.918 | 3.91   | 0.444  | 0.919 |
| PF3D7_1130100 | -9.47    | 0.0813 | 0.918 | 15     | 0.109  | 0.919 |
| PF3D7_0919600 | 4.74     | 0.208  | 0.918 | -3.29  | 0.472  | 0.919 |
| PF3D7_0413900 | -5.82    | 0.149  | 0.918 | 0.473  | 0.863  | 0.98  |
| PF3D7_0620500 | -0.409   | 0.545  | 0.918 | 0.67   | 0.475  | 0.919 |
| PF3D7_1453200 | 0.462    | 0.762  | 0.941 | 0.589  | 0.723  | 0.957 |
| PF3D7_0108500 | -5.44    | 0.116  | 0.918 | 10.3   | 0.117  | 0.919 |
| PF3D7_0810400 | -4.37    | 0.417  | 0.918 | 8.27   | 0.178  | 0.919 |
| PF3D7_0729500 | 0.589    | 0.72   | 0.937 | -0.175 | 0.919  | 0.988 |
| PF3D7_1412900 | -0.651   | 0.748  | 0.94  | 3.22   | 0.338  | 0.919 |
| PF3D7_1141400 | -1.84    | 0.301  | 0.918 | 0.954  | 0.694  | 0.954 |
| PF3D7_0602800 | -1.51    | 0.688  | 0.927 | 1.46   | 0.715  | 0.957 |
| PF3D7_0707200 | 0.849    | 0.866  | 0.972 | -0.843 | 0.872  | 0.981 |
| PF3D7_1206900 | -0.676   | 0.469  | 0.918 | 1.34   | 0.227  | 0.919 |
| PF3D7_0415200 | -0.314   | 0.854  | 0.967 | 0.573  | 0.754  | 0.962 |
| PF3D7_1147700 | -0.822   | 0.886  | 0.979 | 0.154  | 0.983  | 0.998 |
| PF3D7_1234000 | 7.64     | 0.205  | 0.918 | -6.17  | 0.302  | 0.919 |
| PF3D7_1429700 | 4.73     | 0.188  | 0.918 | -4.88  | 0.175  | 0.919 |
| PF3D7_1245900 | -3.04    | 0.447  | 0.918 | 3.29   | 0.371  | 0.919 |
| PF3D7_1365700 | -0.00744 | 0.997  | 0.999 | -0.377 | 0.866  | 0.981 |
| PF3D7_1232900 | 1.39     | 0.458  | 0.918 | 0.159  | 0.953  | 0.994 |
| PF3D7_1238300 | 2.32     | 0.362  | 0.918 | -2.46  | 0.379  | 0.919 |

|               |         |        |       |        |        |       |
|---------------|---------|--------|-------|--------|--------|-------|
| PF3D7_0808400 | 1.68    | 0.646  | 0.919 | 1.69   | 0.56   | 0.927 |
| PF3D7_1477700 | 2.13    | 0.558  | 0.918 | -0.989 | 0.722  | 0.957 |
| PF3D7_1323800 | -1.78   | 0.698  | 0.931 | 1.98   | 0.658  | 0.95  |
| PF3D7_1226200 | 6.43    | 0.14   | 0.918 | -6.47  | 0.142  | 0.919 |
| PF3D7_0316800 | 3.12    | 0.384  | 0.918 | -5.08  | 0.334  | 0.919 |
| PF3D7_1477200 | 5.58    | 0.165  | 0.918 | -0.231 | 0.878  | 0.981 |
| PFD0325w      | 1.71    | 0.633  | 0.919 | 0.24   | 0.946  | 0.994 |
| PF3D7_1445800 | -2.26   | 0.633  | 0.919 | 12.1   | 0.106  | 0.919 |
| PF3D7_0414900 | -3.17   | 0.306  | 0.918 | 2.73   | 0.343  | 0.919 |
| PF3D7_1224000 | -0.814  | 0.827  | 0.959 | 0.284  | 0.952  | 0.994 |
| PFC10_API0014 | 0.415   | 0.882  | 0.979 | 3.72   | 0.438  | 0.919 |
| PF3D7_0618500 | -15.8   | 0.0539 | 0.918 | 4.74   | 0.107  | 0.919 |
| PF3D7_0102600 | -2.53   | 0.438  | 0.918 | 3.13   | 0.38   | 0.919 |
| PF3D7_1132100 | 2.41    | 0.327  | 0.918 | -0.919 | 0.77   | 0.963 |
| PF3D7_1003600 | -11.4   | 0.0519 | 0.918 | 13.3   | 0.0348 | 0.919 |
| PF3D7_1102300 | -6.7    | 0.154  | 0.918 | 1.58   | 0.641  | 0.95  |
| PF3D7_1010600 | 9.91    | 0.112  | 0.918 | 1.48   | 0.761  | 0.962 |
| PF3D7_1431300 | 0.0193  | 0.967  | 0.993 | 0.531  | 0.711  | 0.957 |
| PF3D7_0318700 | 0.862   | 0.561  | 0.918 | -0.628 | 0.757  | 0.962 |
| PF3D7_0115100 | -2.18   | 0.554  | 0.918 | 4.08   | 0.332  | 0.919 |
| PF3D7_1024500 | 2.09    | 0.404  | 0.918 | -1.22  | 0.55   | 0.924 |
| PF3D7_0511200 | -1.91   | 0.636  | 0.919 | 5.27   | 0.229  | 0.919 |
| PF3D7_1335600 | 1.02    | 0.409  | 0.918 | -0.532 | 0.725  | 0.957 |
| PF3D7_1408600 | -2.84   | 0.439  | 0.918 | 4.15   | 0.317  | 0.919 |
| PF3D7_0800200 | 0.526   | 0.658  | 0.921 | 1.02   | 0.745  | 0.958 |
| PF3D7_1003000 | 2.23    | 0.533  | 0.918 | -2.89  | 0.435  | 0.919 |
| PF3D7_0925200 | -8.75   | 0.0673 | 0.918 | 5.98   | 0.332  | 0.919 |
| PF3D7_0821300 | -0.0448 | 0.936  | 0.988 | -0.709 | 0.353  | 0.919 |
| PF3D7_0522700 | 6.28    | 0.287  | 0.918 | -3.81  | 0.473  | 0.919 |
| PF3D7_1440800 | -3.57   | 0.357  | 0.918 | 6.12   | 0.0936 | 0.919 |
| PF3D7_0221400 | -0.657  | 0.674  | 0.923 | 0.57   | 0.736  | 0.957 |
| PF3D7_0530100 | -2.83   | 0.329  | 0.918 | 3.67   | 0.195  | 0.919 |
| PF3D7_0203400 | -15.9   | 0.12   | 0.918 | 13.3   | 0.128  | 0.919 |
| PF3D7_1015000 | -14.6   | 0.0447 | 0.918 | 4.17   | 0.264  | 0.919 |
| PF3D7_0913000 | 1.81    | 0.603  | 0.918 | -6.09  | 0.282  | 0.919 |
| PF3D7_0400400 | -0.329  | 0.759  | 0.941 | 1.38   | 0.295  | 0.919 |
| PF3D7_0317300 | -0.48   | 0.672  | 0.923 | 1.32   | 0.286  | 0.919 |
| PF3D7_0604100 | -0.149  | 0.79   | 0.949 | 0.463  | 0.536  | 0.924 |
| PF3D7_1145200 | -1.79   | 0.313  | 0.918 | 2.05   | 0.342  | 0.919 |
| PF3D7_0100900 | -1.16   | 0.712  | 0.934 | 1.11   | 0.725  | 0.957 |
| PF3D7_0927700 | 6.76    | 0.0933 | 0.918 | 4.07   | 0.444  | 0.919 |
| PF3D7_1466900 | 1.72    | 0.302  | 0.918 | 1.45   | 0.491  | 0.921 |
| PF3D7_1022200 | -1.19   | 0.624  | 0.919 | 10.5   | 0.149  | 0.919 |
| PF3D7_0217900 | -1.26   | 0.498  | 0.918 | 3.23   | 0.158  | 0.919 |
| PF3D7_1001200 | 3.75    | 0.31   | 0.918 | -6.6   | 0.266  | 0.919 |
| PF3D7_1206700 | -0.405  | 0.898  | 0.98  | 1.04   | 0.765  | 0.962 |
| PF3D7_1434200 | -8.14   | 0.186  | 0.918 | 7.7    | 0.158  | 0.919 |

|               |         |        |       |         |        |       |
|---------------|---------|--------|-------|---------|--------|-------|
| PF3D7_1248300 | -4.73   | 0.186  | 0.918 | 0.511   | 0.905  | 0.984 |
| PF3D7_1336200 | -1.12   | 0.646  | 0.919 | 1.25    | 0.599  | 0.936 |
| PF3D7_0630100 | -1.99   | 0.683  | 0.925 | -0.0916 | 0.979  | 0.998 |
| PF3D7_0726600 | -0.857  | 0.223  | 0.918 | 0.738   | 0.44   | 0.919 |
| PF3D7_1367300 | 3.56    | 0.413  | 0.918 | -3.25   | 0.447  | 0.919 |
| PF3D7_1223100 | -1.03   | 0.722  | 0.937 | 2.23    | 0.648  | 0.95  |
| PF3D7_0902400 | 1.16    | 0.423  | 0.918 | -0.631  | 0.688  | 0.954 |
| PF3D7_1443200 | -4.38   | 0.169  | 0.918 | 13      | 0.0741 | 0.919 |
| PF3D7_0404800 | -4.31   | 0.186  | 0.918 | 5.96    | 0.1    | 0.919 |
| PF3D7_0323200 | -1.55   | 0.598  | 0.918 | 2.54    | 0.415  | 0.919 |
| PF3D7_0218400 | -12.2   | 0.238  | 0.918 | 33.2    | 0.152  | 0.919 |
| PF3D7_1306000 | 0.681   | 0.691  | 0.928 | 0.75    | 0.795  | 0.965 |
| PF3D7_1235600 | 0.238   | 0.926  | 0.986 | -0.994  | 0.752  | 0.961 |
| PF3D7_0712600 | -1.67   | 0.356  | 0.918 | 5.38    | 0.102  | 0.919 |
| PF3D7_1406500 | -0.189  | 0.834  | 0.961 | 0.439   | 0.619  | 0.942 |
| PF3D7_0828000 | 8.06    | 0.243  | 0.918 | 0.854   | 0.839  | 0.974 |
| PF3D7_0530900 | 6.55    | 0.243  | 0.918 | -6.59   | 0.242  | 0.919 |
| PF3D7_0109200 | -3.32   | 0.462  | 0.918 | 3.79    | 0.397  | 0.919 |
| PF3D7_1356800 | 0.75    | 0.583  | 0.918 | 0.0873  | 0.954  | 0.994 |
| PF3D7_0605300 | -5.36   | 0.544  | 0.918 | 3.76    | 0.665  | 0.952 |
| PF3D7_1422800 | -2.45   | 0.256  | 0.918 | 4.07    | 0.125  | 0.919 |
| PF3D7_0916900 | 1.43    | 0.327  | 0.918 | -0.36   | 0.857  | 0.978 |
| PF3D7_1228800 | -0.267  | 0.876  | 0.978 | 0.57    | 0.67   | 0.954 |
| PF3D7_1027900 | -6.09   | 0.384  | 0.918 | 7.22    | 0.319  | 0.919 |
| PF3D7_0215800 | -5.29   | 0.128  | 0.918 | 5.07    | 0.236  | 0.919 |
| PFL0630w      | -4.53   | 0.322  | 0.918 | 6.37    | 0.236  | 0.919 |
| PF3D7_1300100 | 1.59    | 0.496  | 0.918 | 0.173   | 0.938  | 0.994 |
| PF3D7_0103800 | -1.02   | 0.805  | 0.953 | 2.51    | 0.574  | 0.933 |
| PF3D7_1326000 | -0.0475 | 0.991  | 0.999 | -1.36   | 0.694  | 0.954 |
| PF3D7_1351300 | -9.74   | 0.0513 | 0.918 | 10.3    | 0.048  | 0.919 |
| PF3D7_0924600 | 1.29    | 0.425  | 0.918 | 1.42    | 0.458  | 0.919 |
| PF3D7_1217300 | -2.44   | 0.399  | 0.918 | 0.761   | 0.857  | 0.978 |
| PFE0885w      | -1.89   | 0.476  | 0.918 | 1.53    | 0.56   | 0.927 |
| PF3D7_1477800 | 4.03    | 0.395  | 0.918 | -5.14   | 0.309  | 0.919 |
| PF3D7_1023700 | 0.912   | 0.832  | 0.96  | 3.76    | 0.328  | 0.919 |
| PF3D7_0936900 | -12.2   | 0.0622 | 0.918 | 9.84    | 0.0453 | 0.919 |
| PF3D7_0820900 | -1.44   | 0.642  | 0.919 | 2.45    | 0.47   | 0.919 |
| PF11_0262     | 0.162   | 0.98   | 0.997 | 6.96    | 0.288  | 0.919 |
| PF3D7_1472200 | -0.714  | 0.626  | 0.919 | 0.82    | 0.582  | 0.933 |
| PF3D7_1328300 | -1.22   | 0.256  | 0.918 | 2.11    | 0.099  | 0.919 |
| PF3D7_1409100 | -3.57   | 0.479  | 0.918 | 3.54    | 0.48   | 0.92  |
| PF3D7_1005900 | 1.78    | 0.637  | 0.919 | 0.296   | 0.924  | 0.989 |
| PF3D7_1348600 | 0.245   | 0.954  | 0.992 | 0.32    | 0.939  | 0.994 |
| PF3D7_0804500 | 0.573   | 0.699  | 0.931 | 0.23    | 0.895  | 0.982 |
| PF3D7_1406100 | 1.26    | 0.746  | 0.94  | -1.83   | 0.649  | 0.95  |
| PF3D7_0904400 | -1.75   | 0.675  | 0.923 | 0.805   | 0.842  | 0.975 |
| PF3D7_0310300 | -0.869  | 0.477  | 0.918 | 1.26    | 0.373  | 0.919 |

|               |         |       |       |         |        |       |
|---------------|---------|-------|-------|---------|--------|-------|
| PF3D7_0925300 | 0.759   | 0.297 | 0.918 | 1.74    | 0.464  | 0.919 |
| PF3D7_0921100 | -6.76   | 0.247 | 0.918 | 6.13    | 0.403  | 0.919 |
| PF3D7_1317000 | 0.358   | 0.825 | 0.958 | 2.33    | 0.238  | 0.919 |
| PF3D7_1207100 | -4.37   | 0.263 | 0.918 | -0.741  | 0.845  | 0.975 |
| PF3D7_1242700 | 3.49    | 0.321 | 0.918 | -1.54   | 0.625  | 0.944 |
| PF3D7_1106100 | -3.12   | 0.543 | 0.918 | 0.356   | 0.945  | 0.994 |
| PF3D7_1420100 | 0.183   | 0.901 | 0.98  | 0.351   | 0.857  | 0.978 |
| PF3D7_1207600 | -7.53   | 0.093 | 0.918 | 5.96    | 0.113  | 0.919 |
| PF3D7_1245000 | -10.3   | 0.106 | 0.918 | 12.4    | 0.0698 | 0.919 |
| PF3D7_0109300 | -2.26   | 0.688 | 0.927 | 5.93    | 0.208  | 0.919 |
| PF3D7_0831600 | 0.505   | 0.902 | 0.98  | 4.23    | 0.319  | 0.919 |
| PF3D7_0725100 | -5.3    | 0.11  | 0.918 | 11.5    | 0.0759 | 0.919 |
| PF3D7_1407100 | 0.0782  | 0.984 | 0.998 | 2.71    | 0.585  | 0.933 |
| PF3D7_0813500 | -3.5    | 0.292 | 0.918 | 3.51    | 0.313  | 0.919 |
| PF3D7_0520300 | -6.33   | 0.212 | 0.918 | 5.37    | 0.349  | 0.919 |
| PF3D7_1005700 | -0.807  | 0.59  | 0.918 | 2.4     | 0.474  | 0.919 |
| PF3D7_0201300 | -1.78   | 0.501 | 0.918 | 2.44    | 0.351  | 0.919 |
| PF3D7_1236900 | -2.96   | 0.335 | 0.918 | 6.13    | 0.172  | 0.919 |
| PF3D7_0318100 | -2.53   | 0.52  | 0.918 | -5.19   | 0.189  | 0.919 |
| PF3D7_0213200 | 0.222   | 0.96  | 0.992 | -1.07   | 0.82   | 0.968 |
| PF3D7_1309100 | 0.44    | 0.885 | 0.979 | 1.75    | 0.526  | 0.924 |
| PF3D7_1411800 | 0.648   | 0.816 | 0.953 | -1.02   | 0.73   | 0.957 |
| PF3D7_0503600 | -0.133  | 0.948 | 0.991 | 0.878   | 0.73   | 0.957 |
| PF3D7_1332500 | 3       | 0.394 | 0.918 | 3.26    | 0.2    | 0.919 |
| PF3D7_1239700 | -2.31   | 0.453 | 0.918 | 3.66    | 0.291  | 0.919 |
| PF3D7_1203400 | 2.95    | 0.417 | 0.918 | -3.72   | 0.321  | 0.919 |
| PF3D7_0417100 | -631    | 0.996 | 0.999 | 1560    | 0.996  | 0.999 |
| PF3D7_1000400 | -0.285  | 0.944 | 0.989 | 0.71    | 0.846  | 0.975 |
| PF3D7_1406400 | 0.524   | 0.744 | 0.94  | 0.981   | 0.459  | 0.919 |
| PF3D7_0721300 | 4.02    | 0.264 | 0.918 | -1.73   | 0.669  | 0.954 |
| PF3D7_1326900 | -2.85   | 0.517 | 0.918 | 3.14    | 0.491  | 0.921 |
| PF3D7_1130500 | -2.51   | 0.557 | 0.918 | 1.48    | 0.778  | 0.963 |
| PF3D7_1433800 | -0.0658 | 0.9   | 0.98  | 0.581   | 0.358  | 0.919 |
| PFC0210c      | -0.253  | 0.665 | 0.922 | 3.38    | 0.295  | 0.919 |
| PF3D7_1203100 | -0.508  | 0.907 | 0.981 | -0.806  | 0.699  | 0.954 |
| PF3D7_1349400 | 0.808   | 0.778 | 0.943 | -0.544  | 0.84   | 0.975 |
| PF3D7_0418300 | 0.181   | 0.881 | 0.978 | -0.987  | 0.585  | 0.933 |
| PF3D7_1406800 | 2.24    | 0.582 | 0.918 | 2       | 0.676  | 0.954 |
| PF3D7_1208600 | -1.23   | 0.547 | 0.918 | 1.92    | 0.492  | 0.921 |
| PF3D7_0425800 | 0.485   | 0.575 | 0.918 | 0.371   | 0.734  | 0.957 |
| PF3D7_1119900 | -1.49   | 0.325 | 0.918 | 2.82    | 0.228  | 0.919 |
| PF3D7_1409200 | -0.351  | 0.909 | 0.983 | -0.0356 | 0.993  | 0.998 |
| PF3D7_0714600 | 0.912   | 0.787 | 0.948 | -5.45   | 0.258  | 0.919 |
| PF3D7_0631300 | -11.2   | 0.166 | 0.918 | 10.4    | 0.186  | 0.919 |
| PF3D7_1247500 | -2.94   | 0.191 | 0.918 | 3.52    | 0.136  | 0.919 |
| PF3D7_1118200 | -0.512  | 0.812 | 0.953 | 2.45    | 0.202  | 0.919 |
| PF3D7_1017800 | -0.607  | 0.77  | 0.943 | 1.58    | 0.442  | 0.919 |

|               |         |        |       |         |        |       |
|---------------|---------|--------|-------|---------|--------|-------|
| PF3D7_0504800 | 0.0229  | 0.982  | 0.997 | 0.705   | 0.591  | 0.935 |
| PF3D7_0201000 | -0.472  | 0.691  | 0.928 | 0.959   | 0.465  | 0.919 |
| PF3D7_0105200 | -2.81   | 0.475  | 0.918 | 3.23    | 0.407  | 0.919 |
| PF3D7_1478200 | -1.24   | 0.733  | 0.937 | 1.35    | 0.715  | 0.957 |
| PF3D7_0614900 | 6.73    | 0.19   | 0.918 | -1.85   | 0.552  | 0.924 |
| PF3D7_1412300 | -10.1   | 0.0974 | 0.918 | 8.11    | 0.126  | 0.919 |
| PF3D7_1213600 | -2.32   | 0.597  | 0.918 | 1.66    | 0.793  | 0.965 |
| PF3D7_0603000 | -1.22   | 0.676  | 0.923 | -0.479  | 0.869  | 0.981 |
| PF3D7_0213000 | 1.05    | 0.711  | 0.933 | 0.915   | 0.702  | 0.954 |
| PF3D7_1143700 | -1.21   | 0.767  | 0.942 | 3.22    | 0.358  | 0.919 |
| PF3D7_1014900 | 1.22    | 0.554  | 0.918 | -1.92   | 0.428  | 0.919 |
| PF3D7_0104000 | -1.29   | 0.776  | 0.943 | -4.22   | 0.39   | 0.919 |
| PF3D7_1025900 | -5.44   | 0.12   | 0.918 | 5.16    | 0.208  | 0.919 |
| PF3D7_0806400 | -5.51   | 0.257  | 0.918 | 6.65    | 0.177  | 0.919 |
| PF3D7_0624000 | -1.42   | 0.764  | 0.941 | 1.66    | 0.73   | 0.957 |
| PF3D7_1000600 | 1.85    | 0.222  | 0.918 | -1.99   | 0.22   | 0.919 |
| PF3D7_0502400 | -0.0118 | 0.975  | 0.996 | 0.0244  | 0.974  | 0.998 |
| PF11_0061     | 6.21    | 0.193  | 0.918 | -3.69   | 0.485  | 0.92  |
| PF3D7_0727600 | 2.86    | 0.523  | 0.918 | -2.69   | 0.547  | 0.924 |
| PF3D7_0208100 | 6.27    | 0.23   | 0.918 | -4.2    | 0.334  | 0.919 |
| PF3D7_0732900 | 0.211   | 0.911  | 0.983 | -0.363  | 0.847  | 0.975 |
| PF3D7_1352400 | 0.191   | 0.945  | 0.99  | 0.0587  | 0.985  | 0.998 |
| PF3D7_1473600 | -12.1   | 0.0525 | 0.918 | 7.8     | 0.098  | 0.919 |
| PF3D7_1340700 | 4.27    | 0.43   | 0.918 | 0.225   | 0.959  | 0.994 |
| PF3D7_1360100 | -6.11   | 0.273  | 0.918 | 22.3    | 0.0642 | 0.919 |
| PF10_0261     | -8.7    | 0.156  | 0.918 | 7.06    | 0.131  | 0.919 |
| PF3D7_0106100 | 4.75    | 0.328  | 0.918 | -4.22   | 0.32   | 0.919 |
| PF3D7_0912000 | 2.76    | 0.39   | 0.918 | -3.52   | 0.351  | 0.919 |
| PF3D7_1410100 | -0.468  | 0.825  | 0.958 | 1.28    | 0.6    | 0.937 |
| PF3D7_0113800 | 3.75    | 0.347  | 0.918 | -0.254  | 0.943  | 0.994 |
| PF3D7_0822200 | -1.05   | 0.822  | 0.956 | 5.09    | 0.425  | 0.919 |
| PF3D7_0700500 | 0.395   | 0.643  | 0.919 | -1.05   | 0.391  | 0.919 |
| PF3D7_1003100 | -1.02   | 0.583  | 0.918 | -0.0623 | 0.99   | 0.998 |
| PF3D7_1320100 | 4.57    | 0.164  | 0.918 | 2.52    | 0.457  | 0.919 |
| PF3D7_1346200 | -0.631  | 0.493  | 0.918 | 1.56    | 0.619  | 0.942 |
| PF3D7_0508200 | 1.4     | 0.778  | 0.943 | 2.21    | 0.679  | 0.954 |
| PF3D7_0406700 | 1.96    | 0.644  | 0.919 | 0.472   | 0.924  | 0.989 |
| PF3D7_1023200 | -7.76   | 0.101  | 0.918 | 9.41    | 0.089  | 0.919 |
| PF3D7_1454600 | 0.897   | 0.716  | 0.935 | -0.545  | 0.812  | 0.968 |
| PF3D7_1432200 | -6.23   | 0.204  | 0.918 | 6       | 0.214  | 0.919 |
| PF3D7_0310200 | -0.601  | 0.312  | 0.918 | 1.18    | 0.137  | 0.919 |
| PF3D7_0504000 | 5.04    | 0.286  | 0.918 | -2.8    | 0.449  | 0.919 |
| PF3D7_1141700 | -1.65   | 0.639  | 0.919 | -3.29   | 0.36   | 0.919 |
| PFC10_API0029 | 12.2    | 0.153  | 0.918 | 0.489   | 0.925  | 0.989 |
| PF3D7_1453700 | 2.14    | 0.521  | 0.918 | -1.92   | 0.622  | 0.942 |
| PF3D7_0631900 | -0.0921 | 0.955  | 0.992 | -0.0508 | 0.98   | 0.998 |
| PF3D7_0315800 | -1.98   | 0.441  | 0.918 | 2.1     | 0.476  | 0.919 |



|               |         |       |       |        |       |       |
|---------------|---------|-------|-------|--------|-------|-------|
| PF3D7_0935400 | 0.0591  | 0.973 | 0.995 | -0.951 | 0.601 | 0.937 |
| PF3D7_0509700 | -0.226  | 0.902 | 0.98  | 2.43   | 0.374 | 0.919 |
| PF3D7_1411200 | -7.44   | 0.089 | 0.918 | 47.2   | 0.131 | 0.919 |
| PF3D7_0933700 | -3.34   | 0.562 | 0.918 | 8.08   | 0.216 | 0.919 |
| PF3D7_0704200 | -0.993  | 0.53  | 0.918 | 0.71   | 0.629 | 0.946 |
| PF3D7_0833500 | -2.4    | 0.283 | 0.918 | 3.39   | 0.164 | 0.919 |
| PF3D7_0722100 | -13.2   | 0.049 | 0.918 | 3.25   | 0.457 | 0.919 |
| PF3D7_1469200 | 3.04    | 0.395 | 0.918 | -2.06  | 0.557 | 0.927 |
| PF3D7_1219700 | -5.74   | 0.198 | 0.918 | 5.07   | 0.268 | 0.919 |
| PF3D7_1440100 | 1.82    | 0.537 | 0.918 | -3.24  | 0.341 | 0.919 |
| PF3D7_0815300 | -0.176  | 0.889 | 0.979 | 1.09   | 0.44  | 0.919 |
| PF3D7_1407000 | 6.97    | 0.126 | 0.918 | -0.401 | 0.934 | 0.992 |
| PF3D7_0323600 | -4.06   | 0.301 | 0.918 | 2.69   | 0.269 | 0.919 |
| PF3D7_1423200 | -1.53   | 0.63  | 0.919 | 2      | 0.524 | 0.924 |
| PF3D7_1436800 | 4       | 0.162 | 0.918 | -2.14  | 0.378 | 0.919 |
| PF3D7_1466100 | 1.43    | 0.725 | 0.937 | -0.599 | 0.876 | 0.981 |
| PF3D7_1439900 | 6.71    | 0.246 | 0.918 | -2.13  | 0.598 | 0.936 |
| PF3D7_0500400 | 2.85    | 0.272 | 0.918 | -2.63  | 0.349 | 0.919 |
| PF3D7_1345000 | 1.97    | 0.614 | 0.919 | -1.3   | 0.774 | 0.963 |
| PF3D7_0520100 | -2.57   | 0.46  | 0.918 | 3.81   | 0.324 | 0.919 |
| PF3D7_1238900 | 1.39    | 0.583 | 0.918 | 0.876  | 0.811 | 0.968 |
| PF3D7_0935800 | -0.486  | 0.501 | 0.918 | 1.42   | 0.152 | 0.919 |
| PF3D7_0513400 | -2.33   | 0.281 | 0.918 | 5.41   | 0.208 | 0.919 |
| PF3D7_1031300 | -1.97   | 0.605 | 0.918 | 3.07   | 0.368 | 0.919 |
| PF3D7_0816900 | -2.26   | 0.512 | 0.918 | -0.683 | 0.885 | 0.981 |
| PF3D7_1334100 | 1.59    | 0.698 | 0.931 | 0.877  | 0.773 | 0.963 |
| PF3D7_0521000 | -10.3   | 0.105 | 0.918 | 5.32   | 0.251 | 0.919 |
| PF3D7_1431100 | -3.77   | 0.345 | 0.918 | 4.88   | 0.206 | 0.919 |
| PF3D7_0929400 | -0.726  | 0.807 | 0.953 | 2.39   | 0.545 | 0.924 |
| PF3D7_1227200 | 0.71    | 0.313 | 0.918 | -0.35  | 0.741 | 0.958 |
| PF3D7_1114200 | 1.81    | 0.594 | 0.918 | -3.16  | 0.579 | 0.933 |
| PF3D7_0724900 | 2.94    | 0.438 | 0.918 | -4.32  | 0.327 | 0.919 |
| PF3D7_1243100 | 3.49    | 0.281 | 0.918 | -6.5   | 0.21  | 0.919 |
| PF3D7_1365600 | 4.93    | 0.121 | 0.918 | -4.3   | 0.175 | 0.919 |
| PF3D7_0205600 | -0.979  | 0.628 | 0.919 | 0.388  | 0.856 | 0.978 |
| PF3D7_1344700 | 0.647   | 0.73  | 0.937 | -2.67  | 0.446 | 0.919 |
| PF3D7_1432700 | -3.32   | 0.334 | 0.918 | 4.14   | 0.271 | 0.919 |
| PF3D7_0617000 | -2.3    | 0.403 | 0.918 | 2.71   | 0.348 | 0.919 |
| PF3D7_1127800 | -0.382  | 0.528 | 0.918 | 0.019  | 0.992 | 0.998 |
| PF3D7_0821700 | 2.07    | 0.609 | 0.919 | -1     | 0.764 | 0.962 |
| PF3D7_0910800 | 3.72    | 0.356 | 0.918 | -2.2   | 0.562 | 0.929 |
| PF3D7_0103100 | -4.24   | 0.264 | 0.918 | 5.94   | 0.236 | 0.919 |
| PF3D7_1443100 | 1.02    | 0.808 | 0.953 | -0.941 | 0.82  | 0.968 |
| PF3D7_0209400 | 6.8     | 0.131 | 0.918 | -2.16  | 0.547 | 0.924 |
| PF3D7_1212700 | 0.00718 | 0.989 | 0.999 | 0.489  | 0.414 | 0.919 |
| PF3D7_0828200 | 0.258   | 0.955 | 0.992 | 0.242  | 0.957 | 0.994 |
| PF3D7_1457600 | 0.0818  | 0.953 | 0.992 | -2.16  | 0.567 | 0.931 |

|               |         |        |       |        |        |       |
|---------------|---------|--------|-------|--------|--------|-------|
| PF3D7_0623700 | 0.256   | 0.902  | 0.98  | 0.518  | 0.801  | 0.965 |
| PF3D7_1236200 | -1.05   | 0.454  | 0.918 | 0.902  | 0.527  | 0.924 |
| PF3D7_1102400 | 0.281   | 0.855  | 0.967 | -1.07  | 0.734  | 0.957 |
| PF3D7_1452500 | 3.28    | 0.418  | 0.918 | -2.82  | 0.556  | 0.927 |
| PF3D7_0724100 | -0.967  | 0.701  | 0.931 | -1     | 0.759  | 0.962 |
| PF3D7_1103800 | -0.0234 | 0.959  | 0.992 | 3.32   | 0.149  | 0.919 |
| PF3D7_1304300 | 1.66    | 0.162  | 0.918 | 1.12   | 0.0947 | 0.919 |
| PF3D7_1343200 | 8.88    | 0.122  | 0.918 | -6.1   | 0.211  | 0.919 |
| PF3D7_1018800 | -8.07   | 0.0869 | 0.918 | 4.97   | 0.165  | 0.919 |
| PF3D7_1343900 | 2.22    | 0.378  | 0.918 | 1.6    | 0.515  | 0.924 |
| PF3D7_1104300 | -1.46   | 0.56   | 0.918 | 0.971  | 0.745  | 0.958 |
| PF3D7_0704700 | -0.828  | 0.366  | 0.918 | 1.29   | 0.237  | 0.919 |
| PF3D7_1117300 | 5.06    | 0.259  | 0.918 | 2.64   | 0.551  | 0.924 |
| PF3D7_0626400 | 3.47    | 0.315  | 0.918 | 0.838  | 0.873  | 0.981 |
| PF3D7_0523100 | -2.91   | 0.399  | 0.918 | 8.43   | 0.109  | 0.919 |
| PF3D7_0307100 | 1.76    | 0.644  | 0.919 | -2.15  | 0.502  | 0.924 |
| PF3D7_1034000 | -2.77   | 0.402  | 0.918 | 4.44   | 0.409  | 0.919 |
| PF3D7_1014600 | 0.303   | 0.612  | 0.919 | 1.38   | 0.278  | 0.919 |
| PF3D7_0937200 | -2.48   | 0.624  | 0.919 | 4.83   | 0.206  | 0.919 |
| MAL7P1.32     | -0.0632 | 0.849  | 0.965 | 0.621  | 0.472  | 0.919 |
| PF3D7_1421200 | 4.51    | 0.402  | 0.918 | -5.45  | 0.392  | 0.919 |
| PF3D7_1146800 | -0.601  | 0.427  | 0.918 | 0.909  | 0.315  | 0.919 |
| PF3D7_0527300 | 3.5     | 0.568  | 0.918 | 3.34   | 0.48   | 0.92  |
| PF3D7_1347200 | -6.31   | 0.173  | 0.918 | 8.39   | 0.0812 | 0.919 |
| PF3D7_1445700 | -5.86   | 0.257  | 0.918 | 5.84   | 0.18   | 0.919 |
| PF3D7_0315900 | -2.43   | 0.399  | 0.918 | 2.47   | 0.375  | 0.919 |
| PF3D7_1032500 | -2.62   | 0.552  | 0.918 | 3.37   | 0.35   | 0.919 |
| PF3D7_0401900 | -1.26   | 0.543  | 0.918 | 4.28   | 0.159  | 0.919 |
| PF3D7_0518100 | -2.77   | 0.565  | 0.918 | 4.47   | 0.35   | 0.919 |
| PF3D7_1142100 | 0.858   | 0.598  | 0.918 | 0.0956 | 0.96   | 0.994 |
| PF3D7_0415300 | 0.396   | 0.877  | 0.978 | -1.55  | 0.775  | 0.963 |
| PF3D7_1300700 | 0.97    | 0.554  | 0.918 | -0.895 | 0.602  | 0.937 |
| PF3D7_1107700 | 0.385   | 0.854  | 0.967 | -2.14  | 0.662  | 0.951 |
| PF3D7_0409200 | -1.01   | 0.734  | 0.937 | 1.19   | 0.69   | 0.954 |
| PF3D7_0110800 | 2.71    | 0.535  | 0.918 | -2.4   | 0.555  | 0.927 |
| PF3D7_1116100 | -2.27   | 0.631  | 0.919 | 1.8    | 0.699  | 0.954 |
| PF3D7_1209800 | -1.29   | 0.767  | 0.942 | 0.357  | 0.938  | 0.994 |
| PF3D7_1033800 | 0.623   | 0.834  | 0.96  | -2.67  | 0.517  | 0.924 |
| PF3D7_1437100 | -0.0352 | 0.992  | 0.999 | -0.808 | 0.879  | 0.981 |
| PF3D7_1001500 | 5.87    | 0.459  | 0.918 | 0.25   | 0.967  | 0.997 |
| PF3D7_0514200 | 2.49    | 0.246  | 0.918 | 0.905  | 0.75   | 0.96  |
| PF3D7_1359600 | 1.27    | 0.327  | 0.918 | 1.44   | 0.54   | 0.924 |
| PF3D7_1462700 | 0.393   | 0.852  | 0.966 | -1.74  | 0.48   | 0.92  |
| PF3D7_0319100 | -5.03   | 0.322  | 0.918 | 7.82   | 0.154  | 0.919 |
| PF3D7_0916200 | -4.99   | 0.413  | 0.918 | 2.94   | 0.636  | 0.95  |
| PF3D7_0900200 | 1.29    | 0.368  | 0.918 | -1.97  | 0.434  | 0.919 |
| PF3D7_0416200 | -1.33   | 0.646  | 0.919 | 3.05   | 0.442  | 0.919 |

|               |         |        |       |         |        |       |
|---------------|---------|--------|-------|---------|--------|-------|
| PF3D7_0525800 | -10.4   | 0.0412 | 0.918 | 11.6    | 0.0368 | 0.919 |
| PF3D7_0914600 | -0.0523 | 0.983  | 0.998 | -0.49   | 0.756  | 0.962 |
| PF3D7_0400100 | -0.308  | 0.904  | 0.98  | 3.71    | 0.293  | 0.919 |
| PF3D7_1115600 | -6.24   | 0.0993 | 0.918 | 5.89    | 0.121  | 0.919 |
| PF3D7_0208500 | 1.96    | 0.527  | 0.918 | -3.11   | 0.539  | 0.924 |
| PF3D7_1122900 | -0.453  | 0.723  | 0.937 | 0.185   | 0.883  | 0.981 |
| PF3D7_0827000 | 0.467   | 0.829  | 0.959 | -3.49   | 0.342  | 0.919 |
| PF3D7_1233800 | -0.135  | 0.963  | 0.992 | 2.27    | 0.49   | 0.921 |
| PF3D7_0312800 | -2.16   | 0.477  | 0.918 | 3.13    | 0.362  | 0.919 |
| PF3D7_1200900 | 0.0455  | 0.993  | 0.999 | -4.11   | 0.24   | 0.919 |
| PF3D7_0732400 | -3.24   | 0.511  | 0.918 | 3.93    | 0.424  | 0.919 |
| PF3D7_1324700 | 2.08    | 0.596  | 0.918 | 2.64    | 0.519  | 0.924 |
| PF3D7_1028100 | 0.516   | 0.919  | 0.984 | -5      | 0.389  | 0.919 |
| PF3D7_1104500 | -1.85   | 0.648  | 0.92  | 2.8     | 0.512  | 0.924 |
| PF3D7_1351600 | -3.81   | 0.391  | 0.918 | 4.64    | 0.324  | 0.919 |
| PF3D7_1122200 | -1.16   | 0.633  | 0.919 | 1.5     | 0.622  | 0.942 |
| PF3D7_1357200 | 2.71    | 0.474  | 0.918 | -1.15   | 0.709  | 0.955 |
| PF3D7_0616900 | 1.53    | 0.479  | 0.918 | -1.74   | 0.46   | 0.919 |
| PF3D7_0610000 | -6.52   | 0.215  | 0.918 | 3.3     | 0.313  | 0.919 |
| PF3D7_0101000 | 1.35    | 0.349  | 0.918 | -0.421  | 0.698  | 0.954 |
| PF3D7_1235000 | 1.63    | 0.382  | 0.918 | 0.99    | 0.572  | 0.931 |
| PF3D7_0530200 | 5.14    | 0.148  | 0.918 | -2.78   | 0.398  | 0.919 |
| PF3D7_0605500 | 1.77    | 0.557  | 0.918 | 0.731   | 0.794  | 0.965 |
| PF3D7_0220200 | 6.7     | 0.236  | 0.918 | -7.56   | 0.268  | 0.919 |
| PF3D7_0806900 | -9.45   | 0.175  | 0.918 | 9.38    | 0.152  | 0.919 |
| PF3D7_0420900 | 20.2    | 0.152  | 0.918 | -14.4   | 0.208  | 0.919 |
| PF3D7_1441600 | -5.02   | 0.115  | 0.918 | 6.35    | 0.0515 | 0.919 |
| PF3D7_0115300 | 2.33    | 0.523  | 0.918 | -2.19   | 0.537  | 0.924 |
| PF3D7_1415100 | 1.1     | 0.682  | 0.925 | -0.936  | 0.761  | 0.962 |
| PF3D7_0301700 | -2.88   | 0.114  | 0.918 | 3.53    | 0.0648 | 0.919 |
| PF3D7_0505200 | -2      | 0.153  | 0.918 | 1.02    | 0.412  | 0.919 |
| PF3D7_0801900 | -0.183  | 0.815  | 0.953 | -0.0158 | 0.989  | 0.998 |
| PF3D7_1012100 | -0.716  | 0.841  | 0.962 | 0.8     | 0.82   | 0.968 |
| PF3D7_1247700 | -1.27   | 0.766  | 0.941 | 0.299   | 0.941  | 0.994 |
| PF08_0088     | -2.57   | 0.483  | 0.918 | 5.45    | 0.118  | 0.919 |
| PF3D7_1203700 | 0.604   | 0.812  | 0.953 | 0.252   | 0.912  | 0.986 |
| PF3D7_1458300 | 1.18    | 0.548  | 0.918 | 2.1     | 0.615  | 0.942 |
| PF3D7_1225800 | -2.76   | 0.39   | 0.918 | 4.9     | 0.128  | 0.919 |
| PF3D7_1114100 | 1.4     | 0.521  | 0.918 | 3.18    | 0.323  | 0.919 |
| PF3D7_1465300 | 0.149   | 0.901  | 0.98  | 2.79    | 0.327  | 0.919 |
| PF3D7_0918000 | 6.23    | 0.116  | 0.918 | -2.52   | 0.276  | 0.919 |
| PF3D7_0613900 | -0.509  | 0.83   | 0.959 | -0.516  | 0.755  | 0.962 |
| PF3D7_1207700 | -0.809  | 0.83   | 0.959 | -4.96   | 0.203  | 0.919 |
| PF3D7_0919200 | -0.501  | 0.724  | 0.937 | 0.825   | 0.731  | 0.957 |
| PF3D7_0626300 | 2.67    | 0.379  | 0.918 | -0.0332 | 0.992  | 0.998 |
| PF3D7_1474400 | 3.78    | 0.317  | 0.918 | -2.57   | 0.443  | 0.919 |
| PF3D7_1230800 | 1.11    | 0.673  | 0.923 | -2.68   | 0.436  | 0.919 |

|               |           |        |       |         |        |       |
|---------------|-----------|--------|-------|---------|--------|-------|
| PF3D7_1446800 | -2.5      | 0.581  | 0.918 | 2.38    | 0.621  | 0.942 |
| PF3D7_1112400 | 4.72      | 0.166  | 0.918 | -2.4    | 0.369  | 0.919 |
| PF3D7_1315800 | 0.592     | 0.679  | 0.923 | 0.607   | 0.657  | 0.95  |
| PF3D7_1444800 | 2.17      | 0.411  | 0.918 | 2.66    | 0.288  | 0.919 |
| PF3D7_1343000 | 10.6      | 0.0587 | 0.918 | -3.99   | 0.363  | 0.919 |
| PF3D7_0831300 | 2.47      | 0.493  | 0.918 | -5.3    | 0.156  | 0.919 |
| PF3D7_0820600 | -5.17     | 0.256  | 0.918 | 8.13    | 0.101  | 0.919 |
| PF3D7_1149400 | -0.974    | 0.574  | 0.918 | 0.781   | 0.831  | 0.972 |
| PF3D7_1338200 | -1.09     | 0.697  | 0.931 | -0.671  | 0.754  | 0.962 |
| PF3D7_1454800 | -8.34     | 0.0543 | 0.918 | 7.26    | 0.0595 | 0.919 |
| PF3D7_0719800 | -5.32     | 0.468  | 0.918 | 4.56    | 0.522  | 0.924 |
| PF3D7_1133100 | -0.843    | 0.726  | 0.937 | 1.93    | 0.479  | 0.92  |
| PF3D7_1030100 | -4.95     | 0.22   | 0.918 | 4.86    | 0.228  | 0.919 |
| PF3D7_0516100 | 6.43      | 0.119  | 0.918 | -2.39   | 0.539  | 0.924 |
| PF3D7_0928500 | -15.1     | 0.18   | 0.918 | 15.2    | 0.17   | 0.919 |
| PF3D7_0311700 | -1.17     | 0.659  | 0.921 | 2       | 0.359  | 0.919 |
| PF3D7_0509100 | 2.39      | 0.106  | 0.918 | -0.104  | 0.938  | 0.994 |
| PF3D7_0202600 | 3.91      | 0.383  | 0.918 | -0.894  | 0.856  | 0.978 |
| PF3D7_0417400 | 0.0531    | 0.879  | 0.978 | 0.15    | 0.763  | 0.962 |
| PF3D7_0312400 | -3.26     | 0.181  | 0.918 | 3.95    | 0.127  | 0.919 |
| PF3D7_0828500 | 2.6       | 0.417  | 0.918 | -3.36   | 0.267  | 0.919 |
| PF3D7_1123700 | -0.697    | 0.907  | 0.981 | 0.512   | 0.932  | 0.992 |
| PF3D7_0527100 | -5.4      | 0.306  | 0.918 | 4.46    | 0.316  | 0.919 |
| PF3D7_1355300 | -5.66     | 0.104  | 0.918 | 7.09    | 0.124  | 0.919 |
| PF3D7_0311300 | 10.3      | 0.107  | 0.918 | -0.461  | 0.905  | 0.984 |
| PF3D7_0710000 | 0.328     | 0.922  | 0.985 | -0.0298 | 0.993  | 0.998 |
| PF3D7_0204600 | -1.52     | 0.616  | 0.919 | 2.08    | 0.498  | 0.923 |
| PF3D7_0322800 | -1.57     | 0.57   | 0.918 | 0.564   | 0.872  | 0.981 |
| PF3D7_1104400 | 8.41      | 0.173  | 0.918 | -3.6    | 0.469  | 0.919 |
| PF3D7_0405700 | 0.757     | 0.318  | 0.918 | 0.515   | 0.493  | 0.921 |
| PF3D7_1126700 | 7.31      | 0.165  | 0.918 | -1.03   | 0.833  | 0.972 |
| PF3D7_0315600 | 7.94      | 0.476  | 0.918 | 4.63    | 0.535  | 0.924 |
| PF3D7_0819700 | -8.11     | 0.0492 | 0.918 | 0.891   | 0.837  | 0.973 |
| PF3D7_0716500 | -1.43     | 0.54   | 0.918 | 2.04    | 0.586  | 0.933 |
| PF3D7_1237100 | 1.13      | 0.726  | 0.937 | -3.02   | 0.361  | 0.919 |
| PF3D7_0922900 | -16.9     | 0.0801 | 0.918 | 13      | 0.0876 | 0.919 |
| PF3D7_0508800 | 0.531     | 0.899  | 0.98  | -0.995  | 0.874  | 0.981 |
| PF3D7_1317300 | -1.09     | 0.725  | 0.937 | 3.1     | 0.437  | 0.919 |
| PF3D7_1355600 | 1.07      | 0.669  | 0.923 | 1.43    | 0.701  | 0.954 |
| PF3D7_1329000 | -1.08     | 0.518  | 0.918 | 1.01    | 0.426  | 0.919 |
| PF3D7_1415600 | 3.39      | 0.438  | 0.918 | -3.98   | 0.376  | 0.919 |
| PF3D7_1410700 | 4.89      | 0.389  | 0.918 | -6.33   | 0.199  | 0.919 |
| PF3D7_1323300 | -0.000146 | 1      | 1     | 0.0998  | 0.933  | 0.992 |
| PF3D7_0106000 | 5.85      | 0.255  | 0.918 | -3.16   | 0.415  | 0.919 |
| PF3D7_1405400 | 1.76      | 0.197  | 0.918 | -0.0162 | 0.992  | 0.998 |
| PF3D7_0832600 | 17.6      | 0.0664 | 0.918 | -15     | 0.0589 | 0.919 |
| PF3D7_1016300 | -0.642    | 0.874  | 0.977 | 0.522   | 0.882  | 0.981 |

|               |        |        |       |        |        |       |
|---------------|--------|--------|-------|--------|--------|-------|
| PF3D7_0303400 | -0.546 | 0.843  | 0.963 | 0.493  | 0.902  | 0.984 |
| PF3D7_1013000 | 4.09   | 0.263  | 0.918 | -2.5   | 0.402  | 0.919 |
| PF3D7_0608100 | 2.38   | 0.498  | 0.918 | -2.15  | 0.531  | 0.924 |
| PF3D7_1412600 | 3.4    | 0.525  | 0.918 | -2.12  | 0.688  | 0.954 |
| PF3D7_1449100 | -0.771 | 0.767  | 0.942 | 0.462  | 0.87   | 0.981 |
| PF3D7_0305900 | -1.95  | 0.528  | 0.918 | -1.27  | 0.719  | 0.957 |
| PF3D7_0114700 | 4.47   | 0.271  | 0.918 | -4.29  | 0.399  | 0.919 |
| PF3D7_1008000 | -0.586 | 0.743  | 0.94  | -0.051 | 0.983  | 0.998 |
| PF3D7_0425300 | 5.19   | 0.242  | 0.918 | -6     | 0.197  | 0.919 |
| PF3D7_1115300 | -1.04  | 0.672  | 0.923 | 0.733  | 0.772  | 0.963 |
| PF3D7_0903100 | 6.59   | 0.151  | 0.918 | -6.51  | 0.1    | 0.919 |
| PF3D7_0822300 | -9.43  | 0.148  | 0.918 | 8.45   | 0.204  | 0.919 |
| PF3D7_0623200 | 4.72   | 0.137  | 0.918 | -1.17  | 0.696  | 0.954 |
| PF3D7_1338000 | -11.1  | 0.0688 | 0.918 | 9.65   | 0.0906 | 0.919 |
| PF3D7_0809900 | -0.219 | 0.76   | 0.941 | 1.36   | 0.156  | 0.919 |
| PF3D7_1368400 | 4.49   | 0.38   | 0.918 | -6.04  | 0.313  | 0.919 |
| PF3D7_0727900 | -0.809 | 0.67   | 0.923 | 1.22   | 0.571  | 0.931 |
| PF3D7_0421200 | 0.446  | 0.812  | 0.953 | 0.561  | 0.78   | 0.963 |
| PF3D7_1416800 | -7.99  | 0.195  | 0.918 | 19     | 0.0938 | 0.919 |
| PF3D7_1344600 | -2.16  | 0.513  | 0.918 | 1.94   | 0.549  | 0.924 |
| PF3D7_0921300 | -2.42  | 0.457  | 0.918 | 6.8    | 0.146  | 0.919 |
| PF3D7_1469400 | 0.225  | 0.947  | 0.99  | 0.105  | 0.978  | 0.998 |
| PF3D7_0526200 | -0.331 | 0.445  | 0.918 | -0.517 | 0.426  | 0.919 |
| PF3D7_1332300 | 12.2   | 0.107  | 0.918 | -11.6  | 0.152  | 0.919 |
| PF3D7_1217100 | -5.66  | 0.435  | 0.918 | 7.84   | 0.274  | 0.919 |
| PF3D7_1409500 | 0.546  | 0.859  | 0.97  | -0.352 | 0.896  | 0.982 |
| PF3D7_1206000 | -7     | 0.154  | 0.918 | 8.25   | 0.189  | 0.919 |
| PF3D7_0220400 | 2.24   | 0.327  | 0.918 | -2.93  | 0.289  | 0.919 |
| PF3D7_0502000 | -1.84  | 0.432  | 0.918 | 3.02   | 0.287  | 0.919 |
| PF3D7_0523900 | -1.79  | 0.762  | 0.941 | -9.6   | 0.236  | 0.919 |
| PF3D7_1422200 | -1.17  | 0.792  | 0.949 | 1.51   | 0.719  | 0.957 |
| PF3D7_0106500 | 3.07   | 0.299  | 0.918 | -3.19  | 0.293  | 0.919 |
| PF3D7_1141300 | -0.739 | 0.814  | 0.953 | 0.954  | 0.812  | 0.968 |
| PF3D7_0618300 | 0.517  | 0.809  | 0.953 | -6.1   | 0.345  | 0.919 |
| PF3D7_1420500 | -15.8  | 0.117  | 0.918 | 18.1   | 0.0621 | 0.919 |
| PF3D7_1146700 | 1.13   | 0.24   | 0.918 | 1.18   | 0.398  | 0.919 |
| PF3D7_0829300 | 0.947  | 0.619  | 0.919 | 0.331  | 0.887  | 0.982 |
| PF3D7_1110200 | -0.567 | 0.743  | 0.94  | 1.29   | 0.479  | 0.92  |
| PF3D7_1439600 | 1.15   | 0.711  | 0.933 | 0.785  | 0.724  | 0.957 |
| PF3D7_1114500 | -1.51  | 0.508  | 0.918 | 1.92   | 0.441  | 0.919 |
| PF3D7_1458900 | -3.92  | 0.371  | 0.918 | 8.52   | 0.112  | 0.919 |
| PF3D7_1227300 | 6.56   | 0.0889 | 0.918 | -2.19  | 0.42   | 0.919 |
| PF3D7_0216200 | 0.802  | 0.83   | 0.959 | 1.62   | 0.701  | 0.954 |
| PF3D7_0203600 | -2.26  | 0.155  | 0.918 | 3.22   | 0.121  | 0.919 |
| PF3D7_0106700 | -3.05  | 0.329  | 0.918 | 6.7    | 0.104  | 0.919 |
| PF3D7_0709600 | -10    | 0.163  | 0.918 | 11.7   | 0.0642 | 0.919 |
| PF3D7_0933600 | 0.694  | 0.821  | 0.956 | -1.6   | 0.674  | 0.954 |

|               |        |        |       |         |        |       |
|---------------|--------|--------|-------|---------|--------|-------|
| PF3D7_0319800 | -3.17  | 0.258  | 0.918 | 3.11    | 0.277  | 0.919 |
| PF3D7_1224200 | -2.34  | 0.283  | 0.918 | 2.4     | 0.234  | 0.919 |
| PF3D7_0813600 | -0.727 | 0.85   | 0.965 | -9.66   | 0.0837 | 0.919 |
| PF3D7_0324400 | -5.51  | 0.342  | 0.918 | 11.2    | 0.218  | 0.919 |
| PF3D7_0821600 | -1.17  | 0.236  | 0.918 | 4.23    | 0.0979 | 0.919 |
| PF3D7_1115800 | 5.24   | 0.237  | 0.918 | -5.58   | 0.161  | 0.919 |
| PF3D7_1462100 | -4.39  | 0.229  | 0.918 | 4.95    | 0.181  | 0.919 |
| PF3D7_1249500 | 2.01   | 0.515  | 0.918 | -2.52   | 0.436  | 0.919 |
| PF3D7_0928200 | -1.69  | 0.695  | 0.93  | 5.52    | 0.379  | 0.919 |
| PF3D7_0417700 | -5.05  | 0.371  | 0.918 | -0.996  | 0.886  | 0.982 |
| PF3D7_1418100 | 0.0453 | 0.915  | 0.984 | 0.706   | 0.551  | 0.924 |
| PF3D7_1308100 | -9.37  | 0.111  | 0.918 | -9.77   | 0.304  | 0.919 |
| PF3D7_0501800 | -1.1   | 0.462  | 0.918 | 1.85    | 0.295  | 0.919 |
| PF3D7_1344000 | -1.55  | 0.63   | 0.919 | 1.12    | 0.803  | 0.965 |
| PF14_0621     | 6.26   | 0.0977 | 0.918 | -1.63   | 0.645  | 0.95  |
| PF3D7_1112300 | 1.11   | 0.363  | 0.918 | -0.0322 | 0.98   | 0.998 |
| PF3D7_1227900 | 2.57   | 0.167  | 0.918 | 2.19    | 0.43   | 0.919 |
| PF3D7_0402900 | -2.58  | 0.342  | 0.918 | 6.21    | 0.166  | 0.919 |
| PF3D7_1358300 | 1.69   | 0.376  | 0.918 | -0.104  | 0.949  | 0.994 |
| PF3D7_1019000 | -4.5   | 0.284  | 0.918 | 2.75    | 0.425  | 0.919 |
| PF3D7_0606600 | -0.534 | 0.621  | 0.919 | -0.102  | 0.958  | 0.994 |
| PF3D7_1458100 | -4.86  | 0.429  | 0.918 | 1.78    | 0.734  | 0.957 |
| PF3D7_0937000 | -6.01  | 0.0849 | 0.918 | 5.78    | 0.0931 | 0.919 |
| PF3D7_1215800 | -0.725 | 0.832  | 0.96  | 1.3     | 0.724  | 0.957 |
| PF3D7_0100400 | 1.37   | 0.566  | 0.918 | -1.68   | 0.491  | 0.921 |
| PF3D7_0305200 | 0.675  | 0.784  | 0.947 | -3.41   | 0.38   | 0.919 |
| PF3D7_0423300 | -0.217 | 0.929  | 0.986 | 0.726   | 0.782  | 0.963 |
| PF3D7_1444700 | 1.96   | 0.662  | 0.921 | -15.7   | 0.0533 | 0.919 |
| PF3D7_0601000 | -1.84  | 0.642  | 0.919 | 1.47    | 0.705  | 0.954 |
| PF3D7_1310200 | 0.102  | 0.958  | 0.992 | 2.14    | 0.25   | 0.919 |
| PF3D7_1247000 | -6.55  | 0.161  | 0.918 | 6.13    | 0.185  | 0.919 |
| PF3D7_0410300 | -0.353 | 0.469  | 0.918 | 0.379   | 0.739  | 0.958 |
| PF3D7_1212900 | 0.245  | 0.691  | 0.928 | -0.101  | 0.944  | 0.994 |
| PF3D7_0618400 | -2.53  | 0.572  | 0.918 | 2.33    | 0.459  | 0.919 |
| PF3D7_1474600 | -6.26  | 0.133  | 0.918 | 8.62    | 0.127  | 0.919 |
| PF3D7_1216000 | 8.6    | 0.113  | 0.918 | -7.92   | 0.143  | 0.919 |
| PF3D7_0210600 | -0.265 | 0.917  | 0.984 | 1.23    | 0.634  | 0.948 |
| PF3D7_0916600 | -19.2  | 0.0853 | 0.918 | 15.8    | 0.0596 | 0.919 |
| PF3D7_1110000 | 0.398  | 0.75   | 0.94  | -0.563  | 0.688  | 0.954 |
| PF3D7_1129700 | -2.47  | 0.504  | 0.918 | 5.27    | 0.269  | 0.919 |
| PF3D7_1309300 | 0.264  | 0.942  | 0.989 | -1.64   | 0.663  | 0.952 |
| PF3D7_1254600 | -6.64  | 0.267  | 0.918 | 7.32    | 0.216  | 0.919 |
| PF3D7_0401200 | 3.76   | 0.0872 | 0.918 | 0.943   | 0.528  | 0.924 |
| PF3D7_0910900 | -0.876 | 0.806  | 0.953 | 0.0859  | 0.981  | 0.998 |
| PF3D7_1239400 | -1.6   | 0.634  | 0.919 | 2.87    | 0.376  | 0.919 |
| PF3D7_1436900 | 10.8   | 0.096  | 0.918 | -7.92   | 0.243  | 0.919 |
| PF3D7_1136900 | 1.24   | 0.522  | 0.918 | 1.61    | 0.544  | 0.924 |

|               |         |        |       |         |        |       |
|---------------|---------|--------|-------|---------|--------|-------|
| PF3D7_1002400 | -13.2   | 0.0501 | 0.918 | 12.1    | 0.0826 | 0.919 |
| PF3D7_1319900 | -3.92   | 0.115  | 0.918 | 6.69    | 0.0536 | 0.919 |
| PF3D7_1038600 | 5.68    | 0.116  | 0.918 | -4.04   | 0.315  | 0.919 |
| PF3D7_0819800 | -0.0341 | 0.994  | 0.999 | 3.79    | 0.516  | 0.924 |
| PF3D7_1142000 | -1.39   | 0.646  | 0.919 | 1.93    | 0.617  | 0.942 |
| PF3D7_1458200 | 2.95    | 0.536  | 0.918 | -2.3    | 0.614  | 0.942 |
| PF3D7_1036300 | -7.7    | 0.0705 | 0.918 | 8.4     | 0.0681 | 0.919 |
| PF3D7_1335500 | -1.41   | 0.468  | 0.918 | 1.51    | 0.537  | 0.924 |
| PF3D7_0716800 | 7.03    | 0.0762 | 0.918 | -7.65   | 0.0771 | 0.919 |
| PF3D7_1117700 | -0.401  | 0.924  | 0.985 | -0.0432 | 0.991  | 0.998 |
| PF3D7_0112100 | -0.227  | 0.772  | 0.943 | 0.0273  | 0.975  | 0.998 |
| PF3D7_1406300 | -0.899  | 0.477  | 0.918 | 1.6     | 0.208  | 0.919 |
| PF07_0098     | -1.39   | 0.697  | 0.931 | 4.32    | 0.366  | 0.919 |
| PF3D7_1206200 | -1.54   | 0.513  | 0.918 | 2.3     | 0.483  | 0.92  |
| PF3D7_0320800 | -0.981  | 0.544  | 0.918 | 1.85    | 0.373  | 0.919 |
| PF3D7_1116400 | 1.81    | 0.71   | 0.933 | 0.585   | 0.895  | 0.982 |
| PF3D7_1313200 | 0.268   | 0.934  | 0.987 | 0.216   | 0.94   | 0.994 |
| PF3D7_0323500 | -0.332  | 0.831  | 0.959 | 3.04    | 0.388  | 0.919 |
| PF3D7_0425200 | -6.77   | 0.0425 | 0.918 | 7.76    | 0.0694 | 0.919 |
| PF3D7_1322300 | -0.531  | 0.685  | 0.926 | 2.47    | 0.345  | 0.919 |
| PF3D7_1127900 | -2.41   | 0.127  | 0.918 | 3.22    | 0.0755 | 0.919 |
| PF3D7_0405900 | -0.696  | 0.484  | 0.918 | 0.461   | 0.69   | 0.954 |
| PF3D7_1012900 | -15.5   | 0.142  | 0.918 | 15.3    | 0.14   | 0.919 |
| PFI1520w      | -0.429  | 0.778  | 0.943 | 0.819   | 0.639  | 0.95  |
| PF3D7_0630700 | 1.83    | 0.677  | 0.923 | -3.2    | 0.513  | 0.924 |
| PF3D7_1231200 | -6.64   | 0.131  | 0.918 | 6.74    | 0.103  | 0.919 |
| PF3D7_1100300 | 2.96    | 0.357  | 0.918 | -3.95   | 0.254  | 0.919 |
| PF3D7_1143400 | -2.27   | 0.468  | 0.918 | 1.27    | 0.726  | 0.957 |
| PF3D7_1356000 | -1.18   | 0.569  | 0.918 | 1.11    | 0.782  | 0.963 |
| PF3D7_0310500 | -0.401  | 0.499  | 0.918 | 1.28    | 0.279  | 0.919 |
| PF3D7_0509000 | 0.209   | 0.92   | 0.985 | -0.323  | 0.896  | 0.982 |
| PF3D7_1122400 | -1.05   | 0.764  | 0.941 | 0.935   | 0.826  | 0.97  |
| PF3D7_0322300 | 7.35    | 0.262  | 0.918 | 0.41    | 0.917  | 0.987 |
| PF3D7_0921600 | 1.69    | 0.521  | 0.918 | -0.836  | 0.727  | 0.957 |
| PF3D7_0510000 | -0.582  | 0.833  | 0.96  | 2.33    | 0.481  | 0.92  |
| PF3D7_1434000 | 5.89    | 0.243  | 0.918 | -3.25   | 0.61   | 0.941 |
| PF3D7_0727500 | -3.17   | 0.223  | 0.918 | 5.16    | 0.11   | 0.919 |
| PF3D7_0729600 | 1.44    | 0.69   | 0.928 | -1.22   | 0.842  | 0.975 |
| PF3D7_0709500 | 1.17    | 0.573  | 0.918 | -1.85   | 0.399  | 0.919 |
| PF3D7_1349700 | 4.39    | 0.207  | 0.918 | -1.12   | 0.776  | 0.963 |
| PF3D7_0407000 | 0.0206  | 0.957  | 0.992 | 0.267   | 0.752  | 0.961 |
| PF3D7_0730100 | -0.322  | 0.913  | 0.984 | 0.815   | 0.784  | 0.963 |
| PF3D7_0409300 | -1.06   | 0.299  | 0.918 | 0.966   | 0.39   | 0.919 |
| PF3D7_0730300 | -0.408  | 0.73   | 0.937 | 0.0793  | 0.945  | 0.994 |
| PFI1105w      | -2.49   | 0.359  | 0.918 | 3.73    | 0.212  | 0.919 |
| PF3D7_0902300 | -0.235  | 0.94   | 0.989 | 3.33    | 0.399  | 0.919 |
| PF3D7_1478500 | -3.82   | 0.168  | 0.918 | -0.498  | 0.793  | 0.965 |

|               |        |        |       |         |        |       |
|---------------|--------|--------|-------|---------|--------|-------|
| PF3D7_0506200 | -4.68  | 0.123  | 0.918 | 5.02    | 0.128  | 0.919 |
| PF3D7_0513800 | -0.667 | 0.862  | 0.971 | 6.01    | 0.167  | 0.919 |
| PF3D7_1219900 | 2.29   | 0.556  | 0.918 | -1.85   | 0.651  | 0.95  |
| PF3D7_1346000 | 0.851  | 0.73   | 0.937 | 3.31    | 0.417  | 0.919 |
| PF3D7_1215600 | -1.17  | 0.318  | 0.918 | -0.814  | 0.6    | 0.937 |
| PF3D7_1240400 | -7.82  | 0.157  | 0.918 | 12.8    | 0.14   | 0.919 |
| PF3D7_0813200 | 0.352  | 0.927  | 0.986 | 7.58    | 0.148  | 0.919 |
| PF3D7_0504300 | 1.94   | 0.588  | 0.918 | 0.228   | 0.947  | 0.994 |
| PF3D7_0526500 | -2.61  | 0.458  | 0.918 | 3.03    | 0.392  | 0.919 |
| PF3D7_0219800 | -4.26  | 0.208  | 0.918 | 7.71    | 0.16   | 0.919 |
| PF3D7_1220000 | -1.69  | 0.361  | 0.918 | 2.2     | 0.397  | 0.919 |
| PF3D7_0613400 | -10.8  | 0.0941 | 0.918 | 1.48    | 0.657  | 0.95  |
| PF3D7_0210700 | -4.08  | 0.235  | 0.918 | 5.39    | 0.13   | 0.919 |
| PF3D7_1034500 | 0.7    | 0.841  | 0.962 | -0.285  | 0.933  | 0.992 |
| PF3D7_1325200 | -7.98  | 0.12   | 0.918 | 13.4    | 0.105  | 0.919 |
| PF3D7_0705000 | -0.663 | 0.613  | 0.919 | 1.61    | 0.206  | 0.919 |
| PF3D7_1442700 | -2.11  | 0.472  | 0.918 | 6.27    | 0.128  | 0.919 |
| PF3D7_1120400 | 0.62   | 0.678  | 0.923 | -1.24   | 0.45   | 0.919 |
| PF3D7_1333900 | 2.49   | 0.515  | 0.918 | -2.16   | 0.552  | 0.924 |
| PF3D7_0935100 | -1.54  | 0.443  | 0.918 | 3.04    | 0.37   | 0.919 |
| PF3D7_0209700 | 1.74   | 0.726  | 0.937 | -2.12   | 0.677  | 0.954 |
| PF3D7_1227700 | -0.59  | 0.844  | 0.963 | -1.21   | 0.683  | 0.954 |
| PF3D7_1302100 | 7.16   | 0.0633 | 0.918 | -2.43   | 0.472  | 0.919 |
| PF3D7_0806500 | -3.28  | 0.423  | 0.918 | 6.31    | 0.129  | 0.919 |
| PF3D7_1036600 | 0.728  | 0.402  | 0.918 | -0.477  | 0.559  | 0.927 |
| PF3D7_1139100 | -0.103 | 0.937  | 0.988 | -1.06   | 0.514  | 0.924 |
| PF3D7_1354600 | 4.55   | 0.382  | 0.918 | -4.62   | 0.463  | 0.919 |
| PF3D7_1129100 | -6.98  | 0.165  | 0.918 | 13.9    | 0.0514 | 0.919 |
| PF3D7_1468200 | -5.84  | 0.225  | 0.918 | 11.4    | 0.14   | 0.919 |
| PF3D7_1478800 | -0.983 | 0.66   | 0.921 | 10.7    | 0.0815 | 0.919 |
| PF3D7_1231100 | -2.14  | 0.521  | 0.918 | 0.916   | 0.815  | 0.968 |
| PF3D7_1419800 | 3.78   | 0.619  | 0.919 | -1.15   | 0.825  | 0.969 |
| PF3D7_1412800 | -5.33  | 0.352  | 0.918 | 5.29    | 0.35   | 0.919 |
| PF3D7_0608500 | -1.18  | 0.689  | 0.927 | 1.96    | 0.62   | 0.942 |
| PF3D7_0703300 | -0.693 | 0.676  | 0.923 | 1.05    | 0.58   | 0.933 |
| PF3D7_0818600 | 3.15   | 0.42   | 0.918 | -6.74   | 0.288  | 0.919 |
| PF3D7_1407600 | 1.01   | 0.674  | 0.923 | -1.25   | 0.668  | 0.954 |
| PF3D7_0924500 | 0.395  | 0.79   | 0.949 | 2.17    | 0.479  | 0.92  |
| PF3D7_0209800 | -1.51  | 0.476  | 0.918 | 1.17    | 0.576  | 0.933 |
| PF3D7_1226600 | -4.08  | 0.138  | 0.918 | 7.84    | 0.0549 | 0.919 |
| PF3D7_0514600 | -1.32  | 0.532  | 0.918 | -0.0682 | 0.987  | 0.998 |
| PF3D7_1465500 | -0.628 | 0.637  | 0.919 | -0.576  | 0.79   | 0.964 |
| PF3D7_0529400 | -2.95  | 0.399  | 0.918 | 7.18    | 0.165  | 0.919 |
| PF3D7_0825000 | 0.626  | 0.845  | 0.963 | -1.3    | 0.709  | 0.955 |
| PF3D7_1453100 | -2.41  | 0.392  | 0.918 | 3.93    | 0.176  | 0.919 |
| PF3D7_1352700 | 0.197  | 0.637  | 0.919 | 0.673   | 0.312  | 0.919 |
| PF3D7_1002100 | -3.79  | 0.13   | 0.918 | 4.5     | 0.103  | 0.919 |



|               |         |        |       |         |        |       |
|---------------|---------|--------|-------|---------|--------|-------|
| PF3D7_1132300 | -0.176  | 0.927  | 0.986 | 1.38    | 0.45   | 0.919 |
| PF3D7_1342400 | 3.44    | 0.284  | 0.918 | -3      | 0.389  | 0.919 |
| PF3D7_0609400 | -4.91   | 0.399  | 0.918 | 4.43    | 0.436  | 0.919 |
| PF3D7_0821500 | -0.0509 | 0.986  | 0.999 | 5.43    | 0.0886 | 0.919 |
| PFL0800c      | 0.266   | 0.911  | 0.983 | 4.38    | 0.156  | 0.919 |
| PF3D7_0913900 | 0.358   | 0.93   | 0.987 | 3.55    | 0.467  | 0.919 |
| PF3D7_0202900 | 1.4     | 0.561  | 0.918 | -2.44   | 0.568  | 0.931 |
| PF3D7_0927900 | -8.21   | 0.156  | 0.918 | 13.7    | 0.0659 | 0.919 |
| PF3D7_1410500 | -2.07   | 0.628  | 0.919 | 1.32    | 0.758  | 0.962 |
| PF3D7_0303800 | 0.686   | 0.73   | 0.937 | -1.58   | 0.465  | 0.919 |
| PF3D7_1326600 | 3.38    | 0.442  | 0.918 | -3.79   | 0.457  | 0.919 |
| PF3D7_1130600 | -1.24   | 0.812  | 0.953 | -3.87   | 0.56   | 0.927 |
| PF3D7_0901400 | -4.06   | 0.479  | 0.918 | 3.58    | 0.536  | 0.924 |
| MAL8P1.155    | 2.61    | 0.56   | 0.918 | 2.69    | 0.485  | 0.92  |
| PF3D7_1348800 | 0.599   | 0.552  | 0.918 | 0.0314  | 0.975  | 0.998 |
| PF3D7_0510400 | 0.48    | 0.608  | 0.918 | 0.381   | 0.863  | 0.98  |
| PF3D7_1327300 | -15.6   | 0.092  | 0.918 | 21.4    | 0.0826 | 0.919 |
| PF3D7_0909800 | -5.56   | 0.217  | 0.918 | -1.12   | 0.755  | 0.962 |
| PF3D7_1242800 | 0.738   | 0.78   | 0.945 | 3.57    | 0.252  | 0.919 |
| PF3D7_1208400 | 5.36    | 0.159  | 0.918 | -5.95   | 0.149  | 0.919 |
| PF3D7_0519000 | 1.66    | 0.594  | 0.918 | -2.16   | 0.524  | 0.924 |
| PF3D7_0929200 | -0.674  | 0.583  | 0.918 | -1.84   | 0.532  | 0.924 |
| PF3D7_0631000 | 1.04    | 0.752  | 0.94  | -2.06   | 0.545  | 0.924 |
| PF3D7_0722800 | 0.74    | 0.336  | 0.918 | -0.414  | 0.657  | 0.95  |
| PF3D7_1115500 | -2.17   | 0.312  | 0.918 | 2.21    | 0.408  | 0.919 |
| PF3D7_1239100 | 1.11    | 0.54   | 0.918 | -0.732  | 0.784  | 0.963 |
| PF3D7_0722900 | -6.96   | 0.25   | 0.918 | 9.11    | 0.262  | 0.919 |
| PF3D7_1429800 | -7.27   | 0.0713 | 0.918 | 7.29    | 0.124  | 0.919 |
| PF3D7_1308800 | 9.21    | 0.179  | 0.918 | -1.14   | 0.821  | 0.968 |
| PF3D7_0727000 | -3.24   | 0.449  | 0.918 | 3.98    | 0.381  | 0.919 |
| PF3D7_0315200 | -0.451  | 0.753  | 0.94  | 0.571   | 0.697  | 0.954 |
| PF3D7_1119600 | 0.453   | 0.902  | 0.98  | -0.178  | 0.962  | 0.995 |
| PF3D7_1366800 | 5.61    | 0.0897 | 0.918 | -3.11   | 0.313  | 0.919 |
| PF3D7_1444200 | 4.62    | 0.171  | 0.918 | -0.56   | 0.879  | 0.981 |
| PF3D7_1323400 | -1.09   | 0.792  | 0.949 | -2.08   | 0.659  | 0.95  |
| PF3D7_0527900 | -0.158  | 0.872  | 0.976 | -0.0883 | 0.954  | 0.994 |
| PF3D7_0521100 | 0.328   | 0.89   | 0.979 | 3.91    | 0.381  | 0.919 |
| PF3D7_0405200 | -0.826  | 0.749  | 0.94  | 2.01    | 0.507  | 0.924 |
| PF3D7_1322500 | -11     | 0.0675 | 0.918 | 10.4    | 0.0916 | 0.919 |
| PF3D7_0319700 | 0.0441  | 0.961  | 0.992 | 1.04    | 0.772  | 0.963 |
| PF3D7_0711700 | -0.864  | 0.43   | 0.918 | 2.81    | 0.154  | 0.919 |
| PF3D7_0919700 | -1.79   | 0.446  | 0.918 | -0.647  | 0.719  | 0.957 |
| PF3D7_0921200 | 3.32    | 0.232  | 0.918 | -1.77   | 0.421  | 0.919 |
| PF3D7_1310100 | 2.16    | 0.465  | 0.918 | -1.09   | 0.763  | 0.962 |
| PF3D7_1456600 | -0.709  | 0.771  | 0.943 | -2.96   | 0.531  | 0.924 |
| PF3D7_1446300 | -5.33   | 0.166  | 0.918 | 5.59    | 0.135  | 0.919 |
| PF3D7_0519500 | 8.99    | 0.0476 | 0.918 | -4      | 0.31   | 0.919 |

|               |        |        |       |        |        |       |
|---------------|--------|--------|-------|--------|--------|-------|
| PF3D7_1431000 | 2.19   | 0.585  | 0.918 | -3.01  | 0.54   | 0.924 |
| PF3D7_0300500 | 1.46   | 0.604  | 0.918 | -1.22  | 0.647  | 0.95  |
| PF3D7_0529900 | 4.03   | 0.416  | 0.918 | 8.11   | 0.164  | 0.919 |
| PF3D7_0820400 | 6.39   | 0.0852 | 0.918 | -2.22  | 0.547  | 0.924 |
| PF3D7_1362100 | 3.49   | 0.459  | 0.918 | -2.32  | 0.705  | 0.954 |
| PF3D7_1117100 | 5.46   | 0.26   | 0.918 | -1.31  | 0.75   | 0.961 |
| PF3D7_1459000 | -7.42  | 0.103  | 0.918 | 6.4    | 0.115  | 0.919 |
| PF3D7_0827700 | -6.66  | 0.169  | 0.918 | 2.49   | 0.539  | 0.924 |
| PF3D7_1352000 | -4.39  | 0.193  | 0.918 | 5.56   | 0.173  | 0.919 |
| PF3D7_1025100 | 0.38   | 0.95   | 0.992 | -0.335 | 0.955  | 0.994 |
| PF3D7_1428400 | 7.63   | 0.368  | 0.918 | -4.78  | 0.534  | 0.924 |
| PF3D7_0111600 | 7.56   | 0.34   | 0.918 | -0.932 | 0.879  | 0.981 |
| PF3D7_0823300 | -1.54  | 0.314  | 0.918 | 1.7    | 0.263  | 0.919 |
| PF3D7_0213800 | 0.861  | 0.404  | 0.918 | 1.73   | 0.653  | 0.95  |
| PF3D7_1324800 | -5.42  | 0.0512 | 0.918 | 11.2   | 0.0408 | 0.919 |
| PF3D7_1006100 | -3.65  | 0.724  | 0.937 | 3.62   | 0.595  | 0.936 |
| PF3D7_1473200 | -7.06  | 0.163  | 0.918 | 8.07   | 0.165  | 0.919 |
| PF3D7_1334300 | 1.39   | 0.802  | 0.953 | -4.97  | 0.321  | 0.919 |
| PF3D7_1477500 | 3.32   | 0.511  | 0.918 | 1.23   | 0.731  | 0.957 |
| PF3D7_1340400 | -0.355 | 0.778  | 0.943 | 0.272  | 0.894  | 0.982 |
| PF3D7_0829000 | 0.352  | 0.614  | 0.919 | 0.386  | 0.686  | 0.954 |
| PF3D7_0704400 | 0.648  | 0.901  | 0.98  | -0.472 | 0.925  | 0.989 |
| PF3D7_0205300 | 0.0621 | 0.957  | 0.992 | 3.22   | 0.263  | 0.919 |
| PF3D7_1321100 | 1.33   | 0.58   | 0.918 | -0.731 | 0.732  | 0.957 |
| PF3D7_1449800 | -9.4   | 0.128  | 0.918 | 4.34   | 0.175  | 0.919 |
| PF3D7_0309900 | -1.64  | 0.7    | 0.931 | 1.9    | 0.646  | 0.95  |
| PF3D7_1235900 | -0.309 | 0.932  | 0.987 | 1.67   | 0.617  | 0.942 |
| PF3D7_0703100 | -1.76  | 0.205  | 0.918 | 2      | 0.17   | 0.919 |
| PF3D7_1442400 | 2.2    | 0.601  | 0.918 | -0.642 | 0.841  | 0.975 |
| PF3D7_1301700 | 0.329  | 0.911  | 0.983 | -1.92  | 0.536  | 0.924 |
| PF3D7_0204700 | 0.319  | 0.927  | 0.986 | 4.8    | 0.127  | 0.919 |
| PF3D7_1023600 | -7.09  | 0.266  | 0.918 | 7.28   | 0.209  | 0.919 |
| PF3D7_1221800 | -1.92  | 0.593  | 0.918 | 3.26   | 0.294  | 0.919 |
| PF3D7_0528200 | -2.03  | 0.464  | 0.918 | -1.39  | 0.659  | 0.95  |
| PF3D7_0107300 | 1.06   | 0.805  | 0.953 | -2.39  | 0.554  | 0.926 |
| PF3D7_1455400 | 7.79   | 0.215  | 0.918 | 2.12   | 0.735  | 0.957 |
| PF3D7_1336100 | -1.13  | 0.649  | 0.92  | 2.84   | 0.484  | 0.92  |
| PF3D7_1306600 | -6.05  | 0.207  | 0.918 | 12.1   | 0.106  | 0.919 |
| PF3D7_0509200 | 0.794  | 0.293  | 0.918 | 1.33   | 0.366  | 0.919 |
| PF3D7_0505000 | 3.75   | 0.227  | 0.918 | -4.21  | 0.185  | 0.919 |
| PF3D7_1034300 | 2.87   | 0.404  | 0.918 | -2.15  | 0.56   | 0.927 |
| PF3D7_1011000 | -3.24  | 0.521  | 0.918 | 2.67   | 0.594  | 0.936 |
| PF3D7_1001800 | -8.6   | 0.114  | 0.918 | -0.93  | 0.855  | 0.978 |
| PF3D7_1206400 | 1.58   | 0.585  | 0.918 | 1.47   | 0.798  | 0.965 |
| PF3D7_1360200 | -1.28  | 0.566  | 0.918 | -0.217 | 0.951  | 0.994 |
| PF3D7_1469600 | -0.28  | 0.636  | 0.919 | 3.29   | 0.153  | 0.919 |
| PF3D7_1325100 | 3.92   | 0.35   | 0.918 | -2.21  | 0.332  | 0.919 |

|               |         |        |       |         |        |       |
|---------------|---------|--------|-------|---------|--------|-------|
| PF3D7_1372800 | 0.301   | 0.732  | 0.937 | -0.0144 | 0.988  | 0.998 |
| PF3D7_1227400 | -0.0565 | 0.983  | 0.998 | -1.69   | 0.678  | 0.954 |
| PF3D7_0914400 | 0.394   | 0.895  | 0.98  | -0.446  | 0.85   | 0.976 |
| PF3D7_0818800 | -2.88   | 0.354  | 0.918 | 2.95    | 0.41   | 0.919 |
| PF3D7_1350300 | -3.97   | 0.301  | 0.918 | 3.9     | 0.31   | 0.919 |
| PF3D7_1356400 | 1.06    | 0.22   | 0.918 | -0.603  | 0.602  | 0.937 |
| PF3D7_1136800 | -8.16   | 0.0844 | 0.918 | 10.7    | 0.0981 | 0.919 |
| PF3D7_1237400 | 0.212   | 0.954  | 0.992 | 3.52    | 0.49   | 0.921 |
| PF3D7_0501900 | -2.83   | 0.397  | 0.918 | 4.48    | 0.346  | 0.919 |
| PF3D7_1354700 | 5.29    | 0.168  | 0.918 | -4.56   | 0.206  | 0.919 |
| PF3D7_0908400 | -22.1   | 0.0748 | 0.918 | 18.3    | 0.0619 | 0.919 |
| PF3D7_0407800 | -4.87   | 0.216  | 0.918 | 1.21    | 0.756  | 0.962 |
| PF3D7_0806300 | 6.95    | 0.125  | 0.918 | -4.11   | 0.291  | 0.919 |
| PF3D7_0926600 | -2.09   | 0.635  | 0.919 | 3.7     | 0.374  | 0.919 |
| PF3D7_1362000 | 0.875   | 0.789  | 0.949 | 0.451   | 0.867  | 0.981 |
| PF3D7_1419600 | 2.38    | 0.505  | 0.918 | 3.48    | 0.232  | 0.919 |
| PF3D7_1220300 | 0.864   | 0.576  | 0.918 | 0.336   | 0.914  | 0.986 |
| PF3D7_1208700 | -6.49   | 0.203  | 0.918 | 6       | 0.171  | 0.919 |
| PF3D7_0720200 | -0.44   | 0.922  | 0.985 | -0.253  | 0.954  | 0.994 |
| PF3D7_1366900 | 4.58    | 0.248  | 0.918 | -7.34   | 0.172  | 0.919 |
| PF3D7_1129000 | 1.82    | 0.612  | 0.919 | 0.859   | 0.877  | 0.981 |
| PF3D7_0702300 | -1.72   | 0.244  | 0.918 | 1.99    | 0.198  | 0.919 |
| PF3D7_0713400 | -1.72   | 0.442  | 0.918 | 1.94    | 0.37   | 0.919 |
| PF3D7_0110100 | 0.883   | 0.813  | 0.953 | -1.34   | 0.7    | 0.954 |
| PF3D7_1363100 | 0.914   | 0.81   | 0.953 | -1.94   | 0.509  | 0.924 |
| PF3D7_0820500 | -5.81   | 0.0895 | 0.918 | 1.97    | 0.592  | 0.936 |
| PF3D7_1242400 | 1.12    | 0.602  | 0.918 | -1.3    | 0.559  | 0.927 |
| PF3D7_0600400 | 0.138   | 0.708  | 0.933 | 0.417   | 0.476  | 0.919 |
| PF3D7_0303500 | 1.42    | 0.729  | 0.937 | -1.68   | 0.704  | 0.954 |
| PF3D7_1121200 | 2.08    | 0.484  | 0.918 | -0.587  | 0.893  | 0.982 |
| PF3D7_0211700 | 2.85    | 0.312  | 0.918 | -3.7    | 0.241  | 0.919 |
| PF3D7_1233400 | 0.0256  | 0.943  | 0.989 | 0.533   | 0.334  | 0.919 |
| PF3D7_0705400 | -2.35   | 0.595  | 0.918 | -0.9    | 0.858  | 0.978 |
| PF3D7_1333000 | -0.639  | 0.833  | 0.96  | 1.43    | 0.614  | 0.942 |
| PF3D7_1221000 | -0.145  | 0.977  | 0.997 | 2.83    | 0.596  | 0.936 |
| PF3D7_0917200 | 6.65    | 0.147  | 0.918 | -2.72   | 0.469  | 0.919 |
| PF3D7_1463400 | 2.49    | 0.201  | 0.918 | -0.823  | 0.677  | 0.954 |
| PF3D7_1140000 | 2.74    | 0.383  | 0.918 | 3.93    | 0.149  | 0.919 |
| PF3D7_0207000 | -0.692  | 0.789  | 0.949 | 13.2    | 0.0826 | 0.919 |
| PF3D7_1373100 | -3.37   | 0.368  | 0.918 | 5.23    | 0.35   | 0.919 |
| PF3D7_0631400 | 3.9     | 0.481  | 0.918 | -1.87   | 0.692  | 0.954 |
| PF3D7_1476100 | 7.02    | 0.119  | 0.918 | -6.79   | 0.125  | 0.919 |
| PF3D7_1452800 | -0.045  | 0.982  | 0.997 | -1.17   | 0.834  | 0.972 |
| PF3D7_1314500 | 0.496   | 0.673  | 0.923 | -0.257  | 0.853  | 0.977 |
| PF3D7_1112200 | -0.596  | 0.734  | 0.937 | 1.34    | 0.726  | 0.957 |
| PF3D7_1407900 | -9.54   | 0.0779 | 0.918 | 6.31    | 0.192  | 0.919 |
| PF10_0088     | 3.71    | 0.4    | 0.918 | -5.81   | 0.165  | 0.919 |

|               |          |        |       |        |        |       |
|---------------|----------|--------|-------|--------|--------|-------|
| PF3D7_0827800 | 0.271    | 0.511  | 0.918 | 0.599  | 0.508  | 0.924 |
| PF3D7_0407100 | -8.99    | 0.0674 | 0.918 | 5.01   | 0.139  | 0.919 |
| PF3D7_1025300 | 0.799    | 0.816  | 0.953 | 7.28   | 0.181  | 0.919 |
| PF3D7_1215200 | -1.34    | 0.385  | 0.918 | 3.19   | 0.229  | 0.919 |
| PF3D7_1137700 | -0.385   | 0.79   | 0.949 | -0.69  | 0.746  | 0.959 |
| PF3D7_0309700 | -3.94    | 0.357  | 0.918 | 5.71   | 0.325  | 0.919 |
| PF3D7_0101100 | -2.59    | 0.36   | 0.918 | 4.21   | 0.249  | 0.919 |
| PF3D7_0923200 | -1.34    | 0.53   | 0.918 | 0.584  | 0.826  | 0.97  |
| PF3D7_0920000 | 4.2      | 0.21   | 0.918 | -1.1   | 0.761  | 0.962 |
| PF3D7_1136100 | 4.3      | 0.225  | 0.918 | -1.3   | 0.563  | 0.93  |
| PF3D7_0831100 | 0.508    | 0.814  | 0.953 | 0.122  | 0.955  | 0.994 |
| PF3D7_1202100 | 0.998    | 0.797  | 0.952 | -3     | 0.5    | 0.924 |
| PF3D7_1123200 | 0.989    | 0.254  | 0.918 | -1.23  | 0.22   | 0.919 |
| PF3D7_1248200 | 4.13     | 0.22   | 0.918 | -2.22  | 0.503  | 0.924 |
| PF3D7_0410800 | -0.0718  | 0.864  | 0.972 | 0.122  | 0.889  | 0.982 |
| PF3D7_0317800 | -1.2     | 0.679  | 0.923 | 1.34   | 0.696  | 0.954 |
| PF3D7_0314200 | 1.36     | 0.735  | 0.937 | -0.454 | 0.917  | 0.987 |
| PF3D7_1014200 | -10.3    | 0.0613 | 0.918 | 12.8   | 0.0776 | 0.919 |
| PF3D7_0414400 | 0.982    | 0.744  | 0.94  | -1.84  | 0.584  | 0.933 |
| PF3D7_1233300 | -1.73    | 0.58   | 0.918 | 2.21   | 0.491  | 0.921 |
| PF3D7_1232600 | 1.55     | 0.133  | 0.918 | -0.341 | 0.731  | 0.957 |
| PF3D7_1208100 | -8.4     | 0.137  | 0.918 | 13.1   | 0.0724 | 0.919 |
| PF3D7_0730500 | 0.665    | 0.675  | 0.923 | -0.974 | 0.642  | 0.95  |
| PF3D7_0626700 | 7.47     | 0.169  | 0.918 | -5.71  | 0.172  | 0.919 |
| PF3D7_1232400 | 2.47     | 0.563  | 0.918 | -3.21  | 0.471  | 0.919 |
| PF3D7_1425900 | 2.08     | 0.476  | 0.918 | -1.59  | 0.659  | 0.95  |
| PF3D7_0930300 | -2.05    | 0.203  | 0.918 | 4.4    | 0.0802 | 0.919 |
| PF3D7_0320500 | 0.0121   | 0.975  | 0.996 | 0.455  | 0.622  | 0.942 |
| PF3D7_1005300 | 4.2      | 0.28   | 0.918 | -2.14  | 0.583  | 0.933 |
| PF3D7_1427500 | -7.28    | 0.119  | 0.918 | 5.93   | 0.183  | 0.919 |
| PF3D7_0817900 | -12.3    | 0.0731 | 0.918 | 4.85   | 0.289  | 0.919 |
| PF3D7_1139300 | -0.00847 | 0.987  | 0.999 | -0.197 | 0.894  | 0.982 |
| PF3D7_0103600 | -0.725   | 0.821  | 0.956 | 0.447  | 0.883  | 0.981 |
| PF3D7_0414300 | -0.603   | 0.707  | 0.933 | 1.08   | 0.723  | 0.957 |
| PF3D7_0611200 | -2.43    | 0.527  | 0.918 | 3.39   | 0.291  | 0.919 |
| PF3D7_1349100 | 4.82     | 0.173  | 0.918 | -2.3   | 0.395  | 0.919 |
| PF3D7_0301400 | -2.54    | 0.442  | 0.918 | 3.08   | 0.386  | 0.919 |
| PF3D7_0319300 | 5.22     | 0.497  | 0.918 | -5.43  | 0.334  | 0.919 |
| PF3D7_0718400 | -0.722   | 0.724  | 0.937 | -0.811 | 0.857  | 0.978 |
| PF3D7_1149500 | -13.8    | 0.0894 | 0.918 | 13.3   | 0.111  | 0.919 |
| PF3D7_0929900 | -4.86    | 0.38   | 0.918 | 5.38   | 0.321  | 0.919 |
| PF3D7_1356100 | 0.0117   | 0.997  | 0.999 | -1.6   | 0.672  | 0.954 |
| PF3D7_0708600 | 1.4      | 0.649  | 0.92  | -2.24  | 0.583  | 0.933 |
| PF3D7_0801700 | -6.61    | 0.175  | 0.918 | 8.17   | 0.0994 | 0.919 |
| PF3D7_1102500 | -7.94    | 0.1    | 0.918 | 13.4   | 0.0417 | 0.919 |
| PF3D7_1416600 | -4.64    | 0.337  | 0.918 | 9.06   | 0.0704 | 0.919 |
| PF3D7_1337400 | 1.54     | 0.52   | 0.918 | -0.832 | 0.763  | 0.962 |

|               |         |        |       |         |        |       |
|---------------|---------|--------|-------|---------|--------|-------|
| PF3D7_0221700 | -2.61   | 0.39   | 0.918 | 4.14    | 0.399  | 0.919 |
| PF3D7_0314900 | -9.47   | 0.0592 | 0.918 | 7.03    | 0.142  | 0.919 |
| PF3D7_1329200 | -4.68   | 0.22   | 0.918 | 4.92    | 0.17   | 0.919 |
| PF3D7_1145500 | 2.7     | 0.486  | 0.918 | -4.06   | 0.354  | 0.919 |
| PF3D7_1423700 | -1.8    | 0.238  | 0.918 | 1.86    | 0.159  | 0.919 |
| PF3D7_1421600 | -3.75   | 0.42   | 0.918 | 8.76    | 0.188  | 0.919 |
| PF3D7_1001400 | -10.8   | 0.0627 | 0.918 | 8.22    | 0.256  | 0.919 |
| PF3D7_0513600 | 6.91    | 0.129  | 0.918 | -7.16   | 0.166  | 0.919 |
| PF3D7_1467400 | 3.93    | 0.232  | 0.918 | -1.05   | 0.733  | 0.957 |
| PF3D7_1327100 | -2.8    | 0.265  | 0.918 | 4.89    | 0.26   | 0.919 |
| PF3D7_1305600 | -2.12   | 0.516  | 0.918 | 0.911   | 0.77   | 0.963 |
| PF3D7_1126200 | -3.07   | 0.538  | 0.918 | 3.85    | 0.49   | 0.921 |
| PF3D7_1236000 | -0.463  | 0.705  | 0.932 | 1.88    | 0.328  | 0.919 |
| PF3D7_0722000 | 0.703   | 0.755  | 0.941 | -0.605  | 0.833  | 0.972 |
| PF3D7_1333800 | -7.46   | 0.261  | 0.918 | 4.8     | 0.338  | 0.919 |
| PF3D7_1011300 | -0.308  | 0.688  | 0.927 | 1.67    | 0.416  | 0.919 |
| PF3D7_0918400 | -4.48   | 0.418  | 0.918 | 6.09    | 0.297  | 0.919 |
| PF3D7_1357300 | 0.372   | 0.836  | 0.961 | -0.191  | 0.899  | 0.983 |
| PF3D7_0300800 | -0.385  | 0.745  | 0.94  | 1.01    | 0.529  | 0.924 |
| PF3D7_0903600 | 0.237   | 0.933  | 0.987 | 4.11    | 0.262  | 0.919 |
| PF3D7_1239200 | 0.839   | 0.531  | 0.918 | 5.85    | 0.227  | 0.919 |
| PF3D7_0528600 | 1.85    | 0.568  | 0.918 | -3.53   | 0.335  | 0.919 |
| PF3D7_1417800 | -2.76   | 0.403  | 0.918 | 3.55    | 0.32   | 0.919 |
| PF3D7_1469900 | 3.42    | 0.478  | 0.918 | -5.08   | 0.441  | 0.919 |
| PF3D7_1138500 | -3.61   | 0.315  | 0.918 | 0.838   | 0.824  | 0.969 |
| PF3D7_1407800 | -4.46   | 0.298  | 0.918 | 5.33    | 0.316  | 0.919 |
| PF3D7_0107500 | -0.544  | 0.788  | 0.948 | 0.296   | 0.902  | 0.984 |
| PF3D7_1212500 | 7.08    | 0.226  | 0.918 | -7.17   | 0.216  | 0.919 |
| PF3D7_1368800 | -0.883  | 0.679  | 0.923 | 1.31    | 0.483  | 0.92  |
| PF3D7_1347900 | -0.28   | 0.508  | 0.918 | 0.538   | 0.541  | 0.924 |
| PF3D7_1364100 | 3.6     | 0.123  | 0.918 | 0.576   | 0.398  | 0.919 |
| PF3D7_1105900 | -0.926  | 0.638  | 0.919 | 4.05    | 0.343  | 0.919 |
| PF3D7_0602600 | -3.91   | 0.282  | 0.918 | 3.51    | 0.246  | 0.919 |
| PF3D7_0108600 | 7.22    | 0.163  | 0.918 | -7.27   | 0.155  | 0.919 |
| PF3D7_1301200 | 5.49    | 0.305  | 0.918 | -8.55   | 0.0944 | 0.919 |
| PF3D7_1250700 | -2.63   | 0.572  | 0.918 | 2.35    | 0.614  | 0.942 |
| PF3D7_0212200 | 3.44    | 0.331  | 0.918 | -3.4    | 0.322  | 0.919 |
| PF3D7_0509400 | 1.29    | 0.698  | 0.931 | -0.0756 | 0.972  | 0.998 |
| PF3D7_1345100 | -0.0784 | 0.986  | 0.999 | -0.0749 | 0.986  | 0.998 |
| PF3D7_0422500 | 0.953   | 0.496  | 0.918 | 0.961   | 0.684  | 0.954 |
| PF3D7_1411400 | -0.524  | 0.432  | 0.918 | 1.3     | 0.195  | 0.919 |
| PF3D7_0304500 | -1.45   | 0.728  | 0.937 | 5.76    | 0.331  | 0.919 |
| PF3D7_0406900 | 2.25    | 0.561  | 0.918 | -0.845  | 0.813  | 0.968 |
| PF3D7_0317500 | -0.102  | 0.853  | 0.967 | 0.662   | 0.399  | 0.919 |
| PF3D7_0525500 | -0.0368 | 0.987  | 0.999 | 0.431   | 0.841  | 0.975 |
| PF3D7_1113600 | -1.25   | 0.72   | 0.937 | -0.393  | 0.902  | 0.984 |
| PF3D7_0217700 | 2.4     | 0.457  | 0.918 | 0.0328  | 0.993  | 0.998 |

|               |         |       |       |        |        |       |
|---------------|---------|-------|-------|--------|--------|-------|
| PF3D7_1013600 | -4.69   | 0.274 | 0.918 | 6.51   | 0.119  | 0.919 |
| PF3D7_0937800 | 4.52    | 0.532 | 0.918 | 0.452  | 0.94   | 0.994 |
| PF3D7_0418100 | 0.28    | 0.905 | 0.98  | -0.846 | 0.706  | 0.954 |
| PF3D7_1456800 | 5.85    | 0.247 | 0.918 | -4.33  | 0.339  | 0.919 |
| PF3D7_1448700 | -4.07   | 0.116 | 0.918 | 5.7    | 0.0554 | 0.919 |
| PF3D7_0806600 | -4.7    | 0.23  | 0.918 | 4.14   | 0.262  | 0.919 |
| PF3D7_0801500 | -0.859  | 0.739 | 0.938 | 1.43   | 0.536  | 0.924 |
| PF3D7_0200500 | 0.274   | 0.885 | 0.979 | 0.155  | 0.939  | 0.994 |
| PF3D7_1127500 | -0.76   | 0.634 | 0.919 | 0.72   | 0.67   | 0.954 |
| PF3D7_1040500 | -0.805  | 0.645 | 0.919 | 1.49   | 0.456  | 0.919 |
| PF3D7_0524800 | 5.47    | 0.136 | 0.918 | -3.22  | 0.218  | 0.919 |
| PF3D7_1461500 | 0.761   | 0.749 | 0.94  | -0.701 | 0.723  | 0.957 |
| PF3D7_0530600 | -1.95   | 0.464 | 0.918 | 5.03   | 0.25   | 0.919 |
| PF3D7_0612200 | -0.266  | 0.958 | 0.992 | 1.82   | 0.72   | 0.957 |
| PF3D7_0510800 | -0.121  | 0.91  | 0.983 | -1.24  | 0.458  | 0.919 |
| PF3D7_1202700 | -5.31   | 0.24  | 0.918 | 3.93   | 0.389  | 0.919 |
| PF3D7_0319200 | 5.41    | 0.21  | 0.918 | -3.93  | 0.329  | 0.919 |
| PF3D7_1117000 | -0.565  | 0.635 | 0.919 | 5.29   | 0.157  | 0.919 |
| PF3D7_0508400 | -7.56   | 0.222 | 0.918 | 10.3   | 0.109  | 0.919 |
| PFC10_API0020 | 0.988   | 0.567 | 0.918 | -2.1   | 0.521  | 0.924 |
| PF3D7_1227100 | 0.785   | 0.43  | 0.918 | 0.233  | 0.883  | 0.981 |
| PF3D7_0410900 | -4.17   | 0.124 | 0.918 | 3.72   | 0.128  | 0.919 |
| PF3D7_0105800 | -2.32   | 0.477 | 0.918 | 2.54   | 0.475  | 0.919 |
| PF3D7_1226100 | 1.47    | 0.534 | 0.918 | -2.4   | 0.349  | 0.919 |
| PF3D7_1033900 | -5.51   | 0.493 | 0.918 | 7.51   | 0.433  | 0.919 |
| PF3D7_1104200 | -1.7    | 0.675 | 0.923 | 13.4   | 0.0376 | 0.919 |
| PF3D7_1009900 | -0.262  | 0.95  | 0.992 | 0.152  | 0.972  | 0.998 |
| PF3D7_1300900 | 1.52    | 0.494 | 0.918 | -1.15  | 0.591  | 0.935 |
| PF3D7_0305800 | 0.558   | 0.538 | 0.918 | 0.711  | 0.777  | 0.963 |
| PF3D7_1478100 | -2.58   | 0.165 | 0.918 | 2.79   | 0.203  | 0.919 |
| PF3D7_0829400 | -1.26   | 0.741 | 0.939 | -3.6   | 0.33   | 0.919 |
| PF3D7_0808800 | 1.16    | 0.572 | 0.918 | -3.56  | 0.315  | 0.919 |
| PF3D7_0605000 | -7.98   | 0.198 | 0.918 | 7.28   | 0.215  | 0.919 |
| PF3D7_0213600 | -7.85   | 0.356 | 0.918 | 11.7   | 0.2    | 0.919 |
| PF3D7_0926100 | 0.325   | 0.794 | 0.95  | -0.391 | 0.703  | 0.954 |
| PF3D7_1348700 | 3.46    | 0.57  | 0.918 | -0.939 | 0.888  | 0.982 |
| PF3D7_1428700 | -0.0376 | 0.958 | 0.992 | 0.0885 | 0.941  | 0.994 |
| PF3D7_1214000 | 0.845   | 0.752 | 0.94  | -0.673 | 0.701  | 0.954 |
| PF3D7_0629700 | 0.495   | 0.454 | 0.918 | 0.504  | 0.693  | 0.954 |
| PF3D7_1140200 | -8.39   | 0.101 | 0.918 | 5.19   | 0.111  | 0.919 |
| PF3D7_1250300 | 2.78    | 0.285 | 0.918 | -2.57  | 0.349  | 0.919 |
| PF3D7_0514900 | 2.16    | 0.519 | 0.918 | -6.41  | 0.144  | 0.919 |
| PF3D7_1332900 | 4.77    | 0.118 | 0.918 | -1.41  | 0.47   | 0.919 |
| PF3D7_0924200 | -1.99   | 0.355 | 0.918 | 2.34   | 0.316  | 0.919 |
| PF3D7_0422900 | -0.991  | 0.679 | 0.923 | 1.3    | 0.753  | 0.961 |
| PF3D7_1231900 | 6.11    | 0.253 | 0.918 | -1.19  | 0.802  | 0.965 |
| PF3D7_1327700 | -2.22   | 0.532 | 0.918 | 0.334  | 0.934  | 0.992 |

|               |        |       |       |         |        |       |
|---------------|--------|-------|-------|---------|--------|-------|
| PF3D7_1411300 | 5      | 0.288 | 0.918 | 0.557   | 0.881  | 0.981 |
| PF3D7_0804000 | -0.904 | 0.487 | 0.918 | 0.406   | 0.778  | 0.963 |
| PF3D7_1017100 | -8.16  | 0.224 | 0.918 | 25.9    | 0.152  | 0.919 |
| PF3D7_1300800 | 0.65   | 0.595 | 0.918 | -0.461  | 0.744  | 0.958 |
| PF3D7_1006600 | 3.66   | 0.267 | 0.918 | -3.01   | 0.39   | 0.919 |
| PF3D7_0507800 | 0.319  | 0.879 | 0.978 | 4.07    | 0.327  | 0.919 |
| PF3D7_1403400 | -0.392 | 0.838 | 0.961 | -0.589  | 0.728  | 0.957 |
| PF3D7_1437300 | -2     | 0.492 | 0.918 | 3.97    | 0.42   | 0.919 |
| PF3D7_1026500 | -4     | 0.451 | 0.918 | 6.18    | 0.288  | 0.919 |
| PF3D7_0601900 | 1.83   | 0.51  | 0.918 | 0.229   | 0.955  | 0.994 |
| PF3D7_1026800 | -7.26  | 0.1   | 0.918 | 7.57    | 0.0669 | 0.919 |
| PF3D7_0712300 | 2.66   | 0.489 | 0.918 | -0.327  | 0.925  | 0.989 |
| PF14_0241     | -3.48  | 0.44  | 0.918 | 4.75    | 0.303  | 0.919 |
| PF3D7_1427400 | 2.9    | 0.531 | 0.918 | 5.91    | 0.354  | 0.919 |
| PF3D7_1463000 | 1.79   | 0.701 | 0.931 | 1.29    | 0.816  | 0.968 |
| PF10_0098     | 4.24   | 0.29  | 0.918 | -3.71   | 0.318  | 0.919 |
| PF3D7_1005500 | -4.24  | 0.31  | 0.918 | 8.24    | 0.12   | 0.919 |
| PF3D7_1111100 | -1.49  | 0.536 | 0.918 | 5.15    | 0.25   | 0.919 |
| PF3D7_1249600 | 10.1   | 0.186 | 0.918 | -10.2   | 0.123  | 0.919 |
| PF3D7_1037600 | 1.11   | 0.329 | 0.918 | 0.919   | 0.709  | 0.955 |
| PF3D7_1214500 | 1.04   | 0.678 | 0.923 | 0.718   | 0.822  | 0.969 |
| PF3D7_0104500 | 5.82   | 0.318 | 0.918 | -6.07   | 0.332  | 0.919 |
| PF3D7_0831200 | -0.188 | 0.756 | 0.941 | 0.0295  | 0.962  | 0.995 |
| PF3D7_1301900 | 1.12   | 0.536 | 0.918 | -0.776  | 0.717  | 0.957 |
| PF3D7_1314700 | -15.7  | 0.142 | 0.918 | 26.4    | 0.086  | 0.919 |
| PF3D7_0400800 | -1.07  | 0.252 | 0.918 | 2.25    | 0.121  | 0.919 |
| PF3D7_1125500 | 1.77   | 0.739 | 0.938 | -1.11   | 0.839  | 0.974 |
| PF3D7_0931600 | -0.54  | 0.873 | 0.976 | -0.0918 | 0.979  | 0.998 |
| PF3D7_0210300 | -2.84  | 0.45  | 0.918 | 4.1     | 0.327  | 0.919 |
| PF3D7_1349500 | -1.06  | 0.711 | 0.933 | 3.13    | 0.336  | 0.919 |
| PF3D7_0212700 | -2.13  | 0.504 | 0.918 | 1.22    | 0.695  | 0.954 |
| PF3D7_0505700 | 2.58   | 0.511 | 0.918 | -1      | 0.788  | 0.964 |
| PF3D7_1211900 | -1.87  | 0.444 | 0.918 | 5.77    | 0.0511 | 0.919 |
| PF3D7_0726800 | 1.73   | 0.58  | 0.918 | -3.49   | 0.448  | 0.919 |
| PF3D7_1441300 | -2.22  | 0.362 | 0.918 | 8.5     | 0.0891 | 0.919 |
| PF3D7_1302800 | -3.69  | 0.336 | 0.918 | 2.79    | 0.438  | 0.919 |
| PF3D7_0825800 | -0.416 | 0.726 | 0.937 | 0.0228  | 0.986  | 0.998 |
| PF3D7_0814000 | -0.994 | 0.768 | 0.942 | 0.121   | 0.976  | 0.998 |
| PF3D7_1461100 | -3.75  | 0.431 | 0.918 | -0.576  | 0.917  | 0.987 |
| PF3D7_1029700 | 0.259  | 0.863 | 0.971 | -0.75   | 0.811  | 0.968 |
| PF3D7_0614400 | 3.45   | 0.191 | 0.918 | -2.84   | 0.314  | 0.919 |
| PF3D7_1004100 | -1.85  | 0.451 | 0.918 | 3.97    | 0.0948 | 0.919 |
| PF3D7_1448600 | -3.64  | 0.238 | 0.918 | 2.49    | 0.423  | 0.919 |
| PF3D7_1103400 | 6.95   | 0.217 | 0.918 | -7.81   | 0.178  | 0.919 |
| PF3D7_0615500 | 4.55   | 0.294 | 0.918 | -9.62   | 0.128  | 0.919 |
| PF3D7_0403800 | 1.26   | 0.612 | 0.919 | -2.23   | 0.393  | 0.919 |
| PF3D7_1444000 | 1.98   | 0.507 | 0.918 | -1.33   | 0.653  | 0.95  |

|               |        |        |       |         |        |       |
|---------------|--------|--------|-------|---------|--------|-------|
| PF3D7_0712400 | 0.461  | 0.393  | 0.918 | 0.65    | 0.381  | 0.919 |
| PF3D7_0824600 | 4.62   | 0.242  | 0.918 | -1.88   | 0.604  | 0.937 |
| PF3D7_1410000 | -2.17  | 0.606  | 0.918 | 1.64    | 0.748  | 0.959 |
| PF3D7_0725500 | 21.5   | 0.0842 | 0.918 | -11.7   | 0.32   | 0.919 |
| PF3D7_1115700 | 0.877  | 0.666  | 0.923 | -0.527  | 0.766  | 0.962 |
| PF3D7_0420100 | -2.83  | 0.381  | 0.918 | 4.61    | 0.239  | 0.919 |
| PF3D7_0500800 | -0.213 | 0.946  | 0.99  | -1.26   | 0.705  | 0.954 |
| PF3D7_0402000 | -4.74  | 0.248  | 0.918 | 6.37    | 0.14   | 0.919 |
| PF3D7_0308900 | -0.964 | 0.664  | 0.922 | 0.668   | 0.779  | 0.963 |
| PF3D7_0505800 | -6.17  | 0.142  | 0.918 | 3       | 0.448  | 0.919 |
| PF3D7_1031000 | 2.7    | 0.457  | 0.918 | -0.65   | 0.826  | 0.97  |
| PF3D7_0114000 | -4.8   | 0.296  | 0.918 | 4.3     | 0.293  | 0.919 |
| PF3D7_0601500 | -4.34  | 0.281  | 0.918 | 4.25    | 0.24   | 0.919 |
| PF3D7_0406000 | 1.14   | 0.687  | 0.927 | 0.768   | 0.795  | 0.965 |
| PF3D7_1330300 | -1.71  | 0.569  | 0.918 | 5.23    | 0.138  | 0.919 |
| PF3D7_0814300 | 4.91   | 0.183  | 0.918 | -4.77   | 0.167  | 0.919 |
| PF3D7_1350800 | -0.249 | 0.921  | 0.985 | -0.184  | 0.947  | 0.994 |
| PF3D7_0526300 | -12.1  | 0.133  | 0.918 | 12.6    | 0.0814 | 0.919 |
| PF3D7_1317100 | 2.79   | 0.43   | 0.918 | 1.6     | 0.631  | 0.946 |
| PF3D7_1429500 | 0.18   | 0.896  | 0.98  | 0.481   | 0.701  | 0.954 |
| PF3D7_0203700 | -2.54  | 0.51   | 0.918 | 3.18    | 0.342  | 0.919 |
| PF3D7_0515800 | -2.65  | 0.575  | 0.918 | 2.31    | 0.713  | 0.957 |
| PF3D7_0416900 | -3.14  | 0.185  | 0.918 | 3.15    | 0.185  | 0.919 |
| PF3D7_0610800 | -12.6  | 0.0619 | 0.918 | 7.52    | 0.1    | 0.919 |
| PF3D7_1240100 | 6.9    | 0.109  | 0.918 | -4.68   | 0.235  | 0.919 |
| PF3D7_1238100 | 1.01   | 0.765  | 0.941 | 0.3     | 0.916  | 0.987 |
| PF3D7_0914900 | -1.12  | 0.467  | 0.918 | 1.72    | 0.457  | 0.919 |
| PF3D7_0731300 | 3.24   | 0.344  | 0.918 | -5.47   | 0.175  | 0.919 |
| PF3D7_0626500 | -0.211 | 0.956  | 0.992 | -2.35   | 0.411  | 0.919 |
| PF3D7_1208900 | -1.81  | 0.506  | 0.918 | 1.78    | 0.499  | 0.923 |
| PF3D7_1211500 | 1.5    | 0.589  | 0.918 | -1.29   | 0.649  | 0.95  |
| PF3D7_1362400 | -1.07  | 0.699  | 0.931 | 1.32    | 0.661  | 0.951 |
| PF3D7_1350000 | -5.71  | 0.511  | 0.918 | 6.38    | 0.451  | 0.919 |
| PF3D7_0912800 | 0.935  | 0.557  | 0.918 | 0.901   | 0.467  | 0.919 |
| PF3D7_0419600 | 17.2   | 0.0571 | 0.918 | -15.7   | 0.0625 | 0.919 |
| PFC10_API0018 | 2.27   | 0.808  | 0.953 | 12.9    | 0.159  | 0.919 |
| PF3D7_1118600 | 3.83   | 0.332  | 0.918 | -3.58   | 0.388  | 0.919 |
| PF3D7_1455000 | 0.373  | 0.789  | 0.949 | 1.34    | 0.706  | 0.954 |
| PF3D7_0924300 | -20.5  | 0.0341 | 0.918 | 18.8    | 0.0835 | 0.919 |
| PF3D7_0507900 | -1.02  | 0.632  | 0.919 | 2.1     | 0.621  | 0.942 |
| PF3D7_1027500 | -3.63  | 0.346  | 0.918 | 6.95    | 0.25   | 0.919 |
| PF3D7_1311200 | 1.87   | 0.768  | 0.942 | -1.76   | 0.78   | 0.963 |
| PF3D7_0705900 | 0.393  | 0.931  | 0.987 | 1.43    | 0.748  | 0.959 |
| PF3D7_1305400 | 0.469  | 0.723  | 0.937 | -0.638  | 0.594  | 0.936 |
| PF3D7_0720400 | -3.84  | 0.301  | 0.918 | 3.67    | 0.409  | 0.919 |
| PF3D7_0511000 | -0.507 | 0.849  | 0.965 | 0.00274 | 0.999  | 1     |
| PF3D7_1012400 | -1.76  | 0.607  | 0.918 | 1.07    | 0.828  | 0.97  |



|               |         |        |       |        |        |       |
|---------------|---------|--------|-------|--------|--------|-------|
| PF3D7_0614000 | -1.07   | 0.821  | 0.956 | 0.643  | 0.887  | 0.982 |
| PF3D7_1320400 | 1.82    | 0.617  | 0.919 | -2     | 0.584  | 0.933 |
| PF3D7_1449500 | 1.02    | 0.416  | 0.918 | -0.5   | 0.76   | 0.962 |
| PF3D7_1126400 | -1.84   | 0.228  | 0.918 | 2.24   | 0.36   | 0.919 |
| PF3D7_0916700 | -4.34   | 0.166  | 0.918 | 4.52   | 0.189  | 0.919 |
| PF3D7_1217500 | 4.59    | 0.277  | 0.918 | -5.33  | 0.224  | 0.919 |
| PF3D7_1221100 | 2.4     | 0.351  | 0.918 | -5.9   | 0.326  | 0.919 |
| PF3D7_0211400 | 2.98    | 0.392  | 0.918 | -2.41  | 0.631  | 0.946 |
| PF3D7_0908200 | 5.23    | 0.228  | 0.918 | -6.04  | 0.167  | 0.919 |
| PF3D7_1335400 | 2.4     | 0.335  | 0.918 | -1.4   | 0.429  | 0.919 |
| PF3D7_1472900 | 9.63    | 0.208  | 0.918 | 0.181  | 0.968  | 0.997 |
| PF3D7_0511700 | -4.77   | 0.449  | 0.918 | 3.92   | 0.544  | 0.924 |
| PF3D7_1404000 | -3.68   | 0.236  | 0.918 | 6.17   | 0.16   | 0.919 |
| PF3D7_0911400 | 2.08    | 0.49   | 0.918 | -2.13  | 0.483  | 0.92  |
| PF3D7_1453300 | 0.435   | 0.906  | 0.981 | -1.26  | 0.649  | 0.95  |
| PF3D7_0111400 | -5.96   | 0.113  | 0.918 | 6.26   | 0.09   | 0.919 |
| PF3D7_1405700 | -0.937  | 0.688  | 0.927 | -3.48  | 0.405  | 0.919 |
| PF3D7_1371500 | -3.6    | 0.459  | 0.918 | 0.427  | 0.809  | 0.967 |
| PF3D7_1102600 | -3.57   | 0.38   | 0.918 | 5.69   | 0.29   | 0.919 |
| PF3D7_1445000 | 2.71    | 0.323  | 0.918 | -2.34  | 0.444  | 0.919 |
| PF3D7_0813300 | -6.08   | 0.194  | 0.918 | 2.65   | 0.42   | 0.919 |
| PF3D7_0928700 | -0.261  | 0.943  | 0.989 | 0.254  | 0.944  | 0.994 |
| PF3D7_0935700 | 0.702   | 0.399  | 0.918 | -0.474 | 0.719  | 0.957 |
| PF14_0078     | -0.339  | 0.918  | 0.984 | 1.07   | 0.824  | 0.969 |
| PF3D7_1209100 | 7.45    | 0.17   | 0.918 | -8.05  | 0.133  | 0.919 |
| PF3D7_0811700 | -0.459  | 0.471  | 0.918 | 1.77   | 0.153  | 0.919 |
| PF3D7_0821400 | 1.1     | 0.71   | 0.933 | -0.332 | 0.909  | 0.984 |
| PF3D7_1408500 | -0.131  | 0.945  | 0.99  | -2.32  | 0.592  | 0.936 |
| PF3D7_1357800 | 0.714   | 0.8    | 0.953 | -0.223 | 0.944  | 0.994 |
| PF3D7_1450700 | -1.89   | 0.506  | 0.918 | 2.43   | 0.441  | 0.919 |
| PF3D7_0110400 | 1.12    | 0.776  | 0.943 | -0.709 | 0.835  | 0.972 |
| PF3D7_0631500 | -0.952  | 0.551  | 0.918 | 1.91   | 0.42   | 0.919 |
| PF3D7_1015800 | -7.53   | 0.116  | 0.918 | 6.6    | 0.0966 | 0.919 |
| PF3D7_1331400 | 10.3    | 0.151  | 0.918 | -6.44  | 0.359  | 0.919 |
| PF3D7_0525600 | 0.00425 | 0.999  | 1     | 0.324  | 0.919  | 0.988 |
| PF3D7_0306200 | -0.151  | 0.667  | 0.923 | 0.783  | 0.334  | 0.919 |
| PF3D7_1405900 | -2.37   | 0.271  | 0.918 | 6.64   | 0.128  | 0.919 |
| PF3D7_0929700 | 1.63    | 0.538  | 0.918 | -2.1   | 0.44   | 0.919 |
| PF3D7_1312300 | 10.1    | 0.318  | 0.918 | -12.6  | 0.226  | 0.919 |
| PF3D7_1040900 | 4.09    | 0.112  | 0.918 | -3.02  | 0.162  | 0.919 |
| PF3D7_0818100 | -0.883  | 0.837  | 0.961 | 0.661  | 0.874  | 0.981 |
| PF3D7_0323100 | -1.49   | 0.419  | 0.918 | 2.14   | 0.294  | 0.919 |
| PF3D7_1472300 | 0.741   | 0.179  | 0.918 | 0.884  | 0.436  | 0.919 |
| PF3D7_1106000 | -9.37   | 0.0842 | 0.918 | 12.4   | 0.0759 | 0.919 |
| PF3D7_0826900 | 2.39    | 0.474  | 0.918 | -1.49  | 0.648  | 0.95  |
| PF3D7_1345700 | 2.54    | 0.291  | 0.918 | -1.1   | 0.634  | 0.948 |
| PF3D7_1460800 | 2.16    | 0.434  | 0.918 | -1.88  | 0.507  | 0.924 |

|               |        |        |       |        |        |       |
|---------------|--------|--------|-------|--------|--------|-------|
| PFE1230c      | 6.47   | 0.213  | 0.918 | -5.2   | 0.293  | 0.919 |
| PF3D7_0210000 | 1.24   | 0.616  | 0.919 | -4.06  | 0.469  | 0.919 |
| PF3D7_1303700 | 5.21   | 0.429  | 0.918 | -5.73  | 0.368  | 0.919 |
| PF3D7_0615600 | 1.85   | 0.733  | 0.937 | -1.35  | 0.798  | 0.965 |
| PF3D7_0629600 | -1.83  | 0.678  | 0.923 | 0.638  | 0.884  | 0.981 |
| PF3D7_0620700 | -3.06  | 0.367  | 0.918 | -2.3   | 0.459  | 0.919 |
| PF3D7_0111000 | 1.27   | 0.219  | 0.918 | 1.12   | 0.387  | 0.919 |
| PF3D7_1356600 | 0.351  | 0.912  | 0.983 | -0.26  | 0.94   | 0.994 |
| PF3D7_1447400 | -7.94  | 0.263  | 0.918 | 7.38   | 0.268  | 0.919 |
| PF3D7_1325300 | 2.39   | 0.558  | 0.918 | -2.68  | 0.549  | 0.924 |
| PF3D7_0823400 | -4.48  | 0.328  | 0.918 | 8.17   | 0.123  | 0.919 |
| PF3D7_1367800 | 2.05   | 0.453  | 0.918 | -2.48  | 0.383  | 0.919 |
| PF3D7_0307400 | 6.05   | 0.13   | 0.918 | -4.83  | 0.179  | 0.919 |
| PF3D7_1000100 | 0.354  | 0.492  | 0.918 | 0.463  | 0.472  | 0.919 |
| PF3D7_1401300 | 3.28   | 0.351  | 0.918 | 1.12   | 0.735  | 0.957 |
| PF3D7_1348900 | 3.81   | 0.269  | 0.918 | -3.75  | 0.281  | 0.919 |
| PF3D7_1108600 | -2.24  | 0.396  | 0.918 | 1.17   | 0.748  | 0.959 |
| PF3D7_0716300 | -0.161 | 0.825  | 0.958 | 0.531  | 0.483  | 0.92  |
| PF3D7_1415000 | 2.6    | 0.383  | 0.918 | 2.7    | 0.41   | 0.919 |
| PF3D7_0315100 | 0.78   | 0.762  | 0.941 | 2.02   | 0.406  | 0.919 |
| PF3D7_1402400 | -11.7  | 0.0857 | 0.918 | 11.7   | 0.0787 | 0.919 |
| PF3D7_1241800 | -6.19  | 0.139  | 0.918 | -2.28  | 0.622  | 0.942 |
| PF3D7_1145400 | 7.73   | 0.102  | 0.918 | -4.62  | 0.141  | 0.919 |
| PF3D7_0823100 | 0.572  | 0.811  | 0.953 | 2.37   | 0.547  | 0.924 |
| PF3D7_1358500 | -5.09  | 0.093  | 0.918 | 3.29   | 0.22   | 0.919 |
| PF3D7_0820100 | -1.63  | 0.672  | 0.923 | -1.33  | 0.753  | 0.961 |
| PF3D7_1437600 | -0.724 | 0.763  | 0.941 | 0.459  | 0.91   | 0.984 |
| PF3D7_0933900 | -2.57  | 0.402  | 0.918 | 2.89   | 0.342  | 0.919 |
| PF3D7_0701900 | -2.12  | 0.481  | 0.918 | 3.43   | 0.309  | 0.919 |
| PF3D7_1347800 | 1.26   | 0.391  | 0.918 | 8.81   | 0.111  | 0.919 |
| PF3D7_0906200 | -0.993 | 0.296  | 0.918 | 1.04   | 0.263  | 0.919 |
| PF3D7_0114500 | 0.108  | 0.914  | 0.984 | 2.35   | 0.133  | 0.919 |
| PF3D7_0702200 | 0.125  | 0.85   | 0.965 | 0.651  | 0.73   | 0.957 |
| PF3D7_1448100 | 6.39   | 0.111  | 0.918 | -6.41  | 0.199  | 0.919 |
| PF3D7_0217600 | 0.821  | 0.652  | 0.92  | -0.38  | 0.835  | 0.973 |
| PF3D7_1141000 | 5.09   | 0.19   | 0.918 | -6.54  | 0.135  | 0.919 |
| PF3D7_1250800 | 1.85   | 0.305  | 0.918 | -0.679 | 0.78   | 0.963 |
| PF3D7_0826500 | 1.78   | 0.171  | 0.918 | 0.776  | 0.629  | 0.946 |
| PF3D7_1372700 | -0.286 | 0.872  | 0.976 | 0.528  | 0.795  | 0.965 |
| PF3D7_0621400 | -1.2   | 0.487  | 0.918 | 1.1    | 0.515  | 0.924 |
| PF3D7_0524700 | -0.447 | 0.884  | 0.979 | -0.294 | 0.939  | 0.994 |
| PF3D7_0404700 | 2.61   | 0.328  | 0.918 | 0.683  | 0.775  | 0.963 |
| PF3D7_1356300 | -5.82  | 0.289  | 0.918 | 9.29   | 0.112  | 0.919 |
| PF3D7_1040300 | 2.43   | 0.335  | 0.918 | -1.77  | 0.391  | 0.919 |
| PF3D7_1308200 | -0.829 | 0.449  | 0.918 | 2.06   | 0.139  | 0.919 |
| PF3D7_0600700 | -0.132 | 0.966  | 0.993 | -0.134 | 0.965  | 0.996 |
| PF3D7_1122300 | 0.678  | 0.367  | 0.918 | -0.416 | 0.72   | 0.957 |

|               |         |        |       |        |        |       |
|---------------|---------|--------|-------|--------|--------|-------|
| PF3D7_0107900 | 2.37    | 0.596  | 0.918 | -1.95  | 0.64   | 0.95  |
| PF3D7_0519600 | -10.9   | 0.0825 | 0.918 | 9.05   | 0.187  | 0.919 |
| PF3D7_1020100 | -2.75   | 0.59   | 0.918 | 2.35   | 0.721  | 0.957 |
| PF3D7_1372600 | 1.83    | 0.632  | 0.919 | -2.26  | 0.55   | 0.924 |
| PF3D7_1306500 | -2.49   | 0.545  | 0.918 | 3.18   | 0.425  | 0.919 |
| PF3D7_0920500 | 1.34    | 0.568  | 0.918 | -0.448 | 0.84   | 0.975 |
| PF3D7_1477000 | 2.6     | 0.443  | 0.918 | 0.567  | 0.865  | 0.981 |
| PF3D7_1434500 | 0.1     | 0.765  | 0.941 | 0.486  | 0.459  | 0.919 |
| PF3D7_0709300 | -1.38   | 0.551  | 0.918 | 0.75   | 0.813  | 0.968 |
| PF3D7_1111200 | 1.85    | 0.65   | 0.92  | -3.49  | 0.297  | 0.919 |
| PF3D7_0819300 | 1.68    | 0.69   | 0.928 | -1.65  | 0.685  | 0.954 |
| PF3D7_0320300 | 5.83    | 0.159  | 0.918 | 0.0791 | 0.972  | 0.998 |
| PF3D7_1446100 | -4.55   | 0.235  | 0.918 | 6.56   | 0.23   | 0.919 |
| PF3D7_1468600 | -6.32   | 0.275  | 0.918 | 3.14   | 0.51   | 0.924 |
| PF3D7_1039700 | 7.55    | 0.3    | 0.918 | -4.72  | 0.475  | 0.919 |
| PF3D7_0522500 | 3.79    | 0.496  | 0.918 | -0.154 | 0.983  | 0.998 |
| PF3D7_1237600 | 0.956   | 0.323  | 0.918 | 0.0467 | 0.967  | 0.997 |
| PF3D7_0420500 | 0.37    | 0.747  | 0.94  | -0.756 | 0.686  | 0.954 |
| PF3D7_1023500 | -1.94   | 0.492  | 0.918 | 2.65   | 0.334  | 0.919 |
| PF3D7_1111300 | 1.73    | 0.606  | 0.918 | -1.35  | 0.679  | 0.954 |
| PF3D7_1004700 | 9.91    | 0.118  | 0.918 | -8.62  | 0.157  | 0.919 |
| PF3D7_0102200 | -1.37   | 0.615  | 0.919 | 4.46   | 0.195  | 0.919 |
| PF3D7_0701100 | -2.1    | 0.663  | 0.921 | 1.94   | 0.669  | 0.954 |
| PF3D7_1012500 | 0.317   | 0.918  | 0.984 | 3.06   | 0.342  | 0.919 |
| PF3D7_0825300 | -27.6   | 0.0584 | 0.918 | 17.7   | 0.0501 | 0.919 |
| PF3D7_0516600 | -5.72   | 0.148  | 0.918 | 15.5   | 0.0717 | 0.919 |
| PF3D7_1323500 | -0.0121 | 0.992  | 0.999 | 0.216  | 0.862  | 0.98  |
| PF3D7_1366000 | -4.28   | 0.555  | 0.918 | 1.54   | 0.789  | 0.964 |
| PF3D7_1208500 | 5.07    | 0.201  | 0.918 | -3.17  | 0.552  | 0.924 |
| PF3D7_1316700 | -9.42   | 0.273  | 0.918 | 16.1   | 0.0977 | 0.919 |
| PF3D7_1367100 | -0.102  | 0.982  | 0.998 | 3.28   | 0.53   | 0.924 |
| PF3D7_0113100 | 1.85    | 0.633  | 0.919 | -0.087 | 0.978  | 0.998 |
| PF3D7_1115200 | -0.803  | 0.628  | 0.919 | -0.927 | 0.696  | 0.954 |
| PF3D7_1037200 | -2.14   | 0.486  | 0.918 | 1.44   | 0.644  | 0.95  |
| PF3D7_0919800 | -0.101  | 0.917  | 0.984 | 0.207  | 0.821  | 0.968 |
| PF3D7_1110100 | -2.51   | 0.629  | 0.919 | -9.83  | 0.158  | 0.919 |
| PF3D7_0717600 | 1.74    | 0.647  | 0.919 | -0.929 | 0.803  | 0.965 |
| PF3D7_0930000 | -0.613  | 0.841  | 0.962 | 3.46   | 0.363  | 0.919 |
| PF3D7_1470100 | 0.111   | 0.752  | 0.94  | 1.36   | 0.221  | 0.919 |
| PF3D7_1000200 | 0.0859  | 0.9    | 0.98  | 0.357  | 0.648  | 0.95  |
| PF3D7_0621800 | -9.48   | 0.187  | 0.918 | 1.31   | 0.801  | 0.965 |
| PF3D7_0926400 | -0.63   | 0.92   | 0.985 | 3.82   | 0.527  | 0.924 |
| PF3D7_1415800 | 4.09    | 0.304  | 0.918 | -5.2   | 0.209  | 0.919 |
| PF3D7_0321500 | 2.88    | 0.478  | 0.918 | -2.38  | 0.556  | 0.927 |
| PF3D7_0207500 | -1.59   | 0.425  | 0.918 | 3.45   | 0.123  | 0.919 |
| PF3D7_0516500 | 1.99    | 0.599  | 0.918 | 1.75   | 0.686  | 0.954 |
| PF3D7_0303200 | -4.69   | 0.192  | 0.918 | 2.47   | 0.458  | 0.919 |

|               |         |       |       |         |        |       |
|---------------|---------|-------|-------|---------|--------|-------|
| PF3D7_0812000 | 9.34    | 0.185 | 0.918 | -3.33   | 0.523  | 0.924 |
| PF3D7_1254500 | 0.0475  | 0.987 | 0.999 | -0.152  | 0.958  | 0.994 |
| PF3D7_1359900 | -1.07   | 0.587 | 0.918 | 0.336   | 0.877  | 0.981 |
| PF3D7_0416400 | -0.0392 | 0.946 | 0.99  | -0.584  | 0.43   | 0.919 |
| PF3D7_0616000 | -4.08   | 0.373 | 0.918 | 2.63    | 0.49   | 0.921 |
| PF3D7_0602100 | -0.657  | 0.43  | 0.918 | 1.23    | 0.256  | 0.919 |
| PF3D7_1447300 | 7.81    | 0.333 | 0.918 | -5.5    | 0.44   | 0.919 |
| PF3D7_0832700 | -3.61   | 0.4   | 0.918 | 3.76    | 0.488  | 0.921 |
| PF3D7_0807700 | -4.2    | 0.155 | 0.918 | 7.88    | 0.0575 | 0.919 |
| PF3D7_1125700 | -0.217  | 0.816 | 0.953 | 0.877   | 0.526  | 0.924 |
| PF3D7_1218100 | -6.74   | 0.214 | 0.918 | 6.28    | 0.197  | 0.919 |
| PF3D7_0934300 | -4.91   | 0.251 | 0.918 | 5.74    | 0.195  | 0.919 |
| PF3D7_0110000 | 4.07    | 0.272 | 0.918 | -2.96   | 0.419  | 0.919 |
| PF3D7_0710200 | -1.21   | 0.37  | 0.918 | 2.7     | 0.22   | 0.919 |
| PF3D7_1011800 | -0.851  | 0.819 | 0.955 | -0.128  | 0.973  | 0.998 |
| PF3D7_0309100 | 0.648   | 0.735 | 0.937 | -0.215  | 0.908  | 0.984 |
| PF3D7_0827600 | -1.51   | 0.455 | 0.918 | 2.5     | 0.278  | 0.919 |
| PFA0370w      | -0.287  | 0.919 | 0.985 | -1.85   | 0.616  | 0.942 |
| PF3D7_0627900 | -0.403  | 0.894 | 0.98  | 8.82    | 0.128  | 0.919 |
| PF3D7_1450200 | -2.37   | 0.541 | 0.918 | -0.0233 | 0.996  | 0.999 |
| PFE0225w      | -4.62   | 0.167 | 0.918 | 5.38    | 0.108  | 0.919 |
| PF3D7_1332800 | 4.14    | 0.383 | 0.918 | -2.91   | 0.5    | 0.924 |
| PF3D7_0903800 | 1.75    | 0.327 | 0.918 | -0.524  | 0.635  | 0.948 |
| PF14_0486     | 14.4    | 0.103 | 0.918 | -13     | 0.108  | 0.919 |
| PF3D7_1006400 | -2.89   | 0.405 | 0.918 | 2.6     | 0.601  | 0.937 |
| PF3D7_1475600 | -4.36   | 0.146 | 0.918 | 6.84    | 0.0931 | 0.919 |
| PF3D7_1361500 | -1.01   | 0.596 | 0.918 | 1.04    | 0.641  | 0.95  |
| PF3D7_1027400 | -3.37   | 0.155 | 0.918 | 8.31    | 0.106  | 0.919 |
| PF3D7_0729800 | -1.76   | 0.577 | 0.918 | 1.27    | 0.681  | 0.954 |
| PF3D7_0106400 | -0.682  | 0.639 | 0.919 | -0.0862 | 0.983  | 0.998 |
| PF3D7_0809600 | 1.41    | 0.149 | 0.918 | -0.539  | 0.574  | 0.933 |
| PF3D7_1025700 | -0.981  | 0.644 | 0.919 | 0.709   | 0.885  | 0.981 |
| PF3D7_0206100 | 1.83    | 0.688 | 0.927 | 12.6    | 0.118  | 0.919 |
| PF3D7_1107100 | -4.2    | 0.289 | 0.918 | 4.63    | 0.216  | 0.919 |
| PF3D7_1344500 | 1.16    | 0.829 | 0.959 | -1.11   | 0.788  | 0.964 |
| PF3D7_1359700 | 0.655   | 0.26  | 0.918 | 2.89    | 0.188  | 0.919 |
| PF3D7_0103000 | -0.501  | 0.751 | 0.94  | 2.02    | 0.421  | 0.919 |
| PF3D7_1241700 | -1.84   | 0.608 | 0.919 | 10.4    | 0.124  | 0.919 |
| PF3D7_0519200 | -6.1    | 0.234 | 0.918 | 10.3    | 0.0935 | 0.919 |
| PF3D7_1357700 | -0.405  | 0.842 | 0.963 | 4.63    | 0.233  | 0.919 |
| PF3D7_1363200 | -3.51   | 0.381 | 0.918 | 4.4     | 0.297  | 0.919 |
| PF3D7_0625700 | 1.32    | 0.591 | 0.918 | -1.85   | 0.577  | 0.933 |
| PF3D7_1429000 | -0.777  | 0.812 | 0.953 | 1.96    | 0.369  | 0.919 |
| PF3D7_0517000 | -4.33   | 0.446 | 0.918 | 3.2     | 0.551  | 0.924 |
| PF3D7_0530000 | -6.03   | 0.34  | 0.918 | 4.96    | 0.416  | 0.919 |
| PF3D7_0424900 | 1.32    | 0.739 | 0.938 | 5.98    | 0.19   | 0.919 |
| PF3D7_1200400 | -0.243  | 0.829 | 0.959 | 0.929   | 0.652  | 0.95  |

|               |         |        |       |         |        |       |
|---------------|---------|--------|-------|---------|--------|-------|
| PF3D7_0910200 | -0.498  | 0.579  | 0.918 | 1.65    | 0.17   | 0.919 |
| PF3D7_1461900 | -0.933  | 0.674  | 0.923 | 4.7     | 0.148  | 0.919 |
| PF3D7_0926300 | 4.27    | 0.296  | 0.918 | -2.63   | 0.49   | 0.921 |
| PF3D7_0518900 | 3.1     | 0.287  | 0.918 | -0.405  | 0.857  | 0.978 |
| PF3D7_1215400 | -0.125  | 0.896  | 0.98  | 0.355   | 0.699  | 0.954 |
| PF3D7_0203900 | 0.569   | 0.83   | 0.959 | -3.68   | 0.376  | 0.919 |
| PF3D7_1011700 | -3.34   | 0.168  | 0.918 | 4.7     | 0.105  | 0.919 |
| PF3D7_1255000 | -0.739  | 0.672  | 0.923 | 0.71    | 0.78   | 0.963 |
| PF3D7_1472500 | 3.4     | 0.445  | 0.918 | -0.981  | 0.81   | 0.968 |
| PF3D7_0929000 | 2.09    | 0.365  | 0.918 | -1.09   | 0.608  | 0.94  |
| PF3D7_1010200 | -21.1   | 0.118  | 0.918 | 20.9    | 0.12   | 0.919 |
| PF3D7_1201600 | -1.04   | 0.733  | 0.937 | 0.651   | 0.872  | 0.981 |
| PF3D7_1436100 | -0.0678 | 0.963  | 0.992 | -0.0643 | 0.947  | 0.994 |
| PF3D7_1323700 | 1.17    | 0.739  | 0.938 | -0.487  | 0.892  | 0.982 |
| PF3D7_1440900 | -1.81   | 0.295  | 0.918 | -4.3    | 0.116  | 0.919 |
| PF3D7_0100800 | 6.68    | 0.318  | 0.918 | -6.77   | 0.303  | 0.919 |
| PF3D7_0913800 | 0.155   | 0.966  | 0.993 | -1.56   | 0.685  | 0.954 |
| PF3D7_1113900 | -1.58   | 0.533  | 0.918 | 2.28    | 0.451  | 0.919 |
| PF3D7_1009400 | -2.2    | 0.473  | 0.918 | 1.49    | 0.676  | 0.954 |
| PF3D7_1205900 | -19.7   | 0.123  | 0.918 | 12.2    | 0.106  | 0.919 |
| PF3D7_1476400 | -12.5   | 0.0678 | 0.918 | 11.2    | 0.0877 | 0.919 |
| PF3D7_0811000 | -4.72   | 0.192  | 0.918 | 5.84    | 0.199  | 0.919 |
| PF3D7_1473400 | -3.98   | 0.202  | 0.918 | 2.94    | 0.461  | 0.919 |
| PF3D7_1404800 | 2.01    | 0.577  | 0.918 | -1.16   | 0.733  | 0.957 |
| PF3D7_1113700 | 1.53    | 0.564  | 0.918 | -1.81   | 0.494  | 0.921 |
| PF3D7_0815100 | -1.01   | 0.422  | 0.918 | 0.684   | 0.687  | 0.954 |
| PF3D7_1360700 | 1.61    | 0.668  | 0.923 | 1.46    | 0.713  | 0.957 |
| PF3D7_0818500 | -8.73   | 0.0974 | 0.918 | 11.1    | 0.0741 | 0.919 |
| PF3D7_0513700 | -4.69   | 0.185  | 0.918 | 5.72    | 0.195  | 0.919 |
| PF3D7_0205900 | -1.41   | 0.579  | 0.918 | 3.88    | 0.157  | 0.919 |
| PF3D7_0832300 | -16.4   | 0.104  | 0.918 | 16.7    | 0.147  | 0.919 |
| PF3D7_0309600 | -7.94   | 0.08   | 0.918 | 6.47    | 0.109  | 0.919 |
| PF3D7_0407200 | -0.433  | 0.827  | 0.959 | 0.37    | 0.825  | 0.969 |
| PF3D7_0311800 | -0.806  | 0.677  | 0.923 | 2.5     | 0.318  | 0.919 |
| PF3D7_0810800 | 1.38    | 0.495  | 0.918 | -0.381  | 0.821  | 0.968 |
| PF3D7_1206300 | 1.26    | 0.786  | 0.948 | -1.58   | 0.752  | 0.961 |
| PF3D7_1245500 | -3.81   | 0.4    | 0.918 | 3.49    | 0.498  | 0.923 |
| PF3D7_0900100 | 0.717   | 0.305  | 0.918 | -1.75   | 0.306  | 0.919 |
| PF3D7_0720800 | -8.7    | 0.212  | 0.918 | 8.08    | 0.253  | 0.919 |
| PF3D7_1143300 | 0.31    | 0.857  | 0.969 | 1.62    | 0.432  | 0.919 |
| PF3D7_0205800 | -32.1   | 0.09   | 0.918 | 26.2    | 0.081  | 0.919 |
| PF3D7_1400800 | 0.264   | 0.922  | 0.985 | 1.77    | 0.586  | 0.933 |
| PF3D7_1106900 | 2.16    | 0.543  | 0.918 | -1.21   | 0.473  | 0.919 |
| PF3D7_1314900 | 0.583   | 0.795  | 0.951 | 2.49    | 0.499  | 0.923 |
| PF3D7_1244000 | -4.65   | 0.335  | 0.918 | 3.24    | 0.456  | 0.919 |
| PF3D7_1434700 | -1.89   | 0.575  | 0.918 | 6.8     | 0.105  | 0.919 |
| PF3D7_0503000 | -3.21   | 0.321  | 0.918 | 7.01    | 0.111  | 0.919 |

|               |         |        |       |        |        |       |
|---------------|---------|--------|-------|--------|--------|-------|
| PF3D7_1106400 | -2.63   | 0.49   | 0.918 | -0.921 | 0.807  | 0.967 |
| PF3D7_1447500 | 2.45    | 0.65   | 0.92  | 2.6    | 0.559  | 0.927 |
| PF3D7_0103300 | -2.1    | 0.64   | 0.919 | 2.73   | 0.621  | 0.942 |
| PF3D7_1351900 | -1.95   | 0.425  | 0.918 | 4.43   | 0.168  | 0.919 |
| PF3D7_0908100 | 2.04    | 0.423  | 0.918 | -0.428 | 0.85   | 0.977 |
| PF3D7_1010800 | -1.22   | 0.828  | 0.959 | 1.37   | 0.809  | 0.967 |
| PF3D7_1213300 | 2.44    | 0.429  | 0.918 | -4.83  | 0.413  | 0.919 |
| PF3D7_1228000 | 6.32    | 0.154  | 0.918 | -7.22  | 0.122  | 0.919 |
| PF3D7_1329400 | -0.471  | 0.863  | 0.971 | 3.65   | 0.255  | 0.919 |
| PF3D7_0317100 | -0.376  | 0.749  | 0.94  | 1.06   | 0.424  | 0.919 |
| PF3D7_0823900 | -0.619  | 0.775  | 0.943 | 0.771  | 0.72   | 0.957 |
| PF3D7_1336400 | -0.172  | 0.918  | 0.984 | -4.14  | 0.42   | 0.919 |
| PF3D7_0624500 | -2.86   | 0.607  | 0.918 | 3.12   | 0.569  | 0.931 |
| PF3D7_1116500 | -6.66   | 0.18   | 0.918 | 8.69   | 0.0625 | 0.919 |
| PF3D7_1200200 | -2.71   | 0.403  | 0.918 | 2.98   | 0.328  | 0.919 |
| PF3D7_1033500 | -15     | 0.0989 | 0.918 | 10.6   | 0.139  | 0.919 |
| PF3D7_1211700 | 0.772   | 0.747  | 0.94  | -1.64  | 0.562  | 0.929 |
| PF3D7_0607100 | 0.463   | 0.933  | 0.987 | -0.667 | 0.908  | 0.984 |
| PF3D7_1307300 | 0.809   | 0.679  | 0.923 | -0.47  | 0.813  | 0.968 |
| PF3D7_0830800 | -2.01   | 0.137  | 0.918 | 2.91   | 0.0681 | 0.919 |
| PF3D7_0617400 | -2.85   | 0.382  | 0.918 | 5.79   | 0.143  | 0.919 |
| PF3D7_1477600 | -3.17   | 0.33   | 0.918 | 0.667  | 0.853  | 0.977 |
| PF3D7_0715000 | -0.0874 | 0.962  | 0.992 | 2.23   | 0.404  | 0.919 |
| PF3D7_0518300 | 6.93    | 0.231  | 0.918 | -3.56  | 0.466  | 0.919 |
| PF3D7_1371900 | -2.31   | 0.51   | 0.918 | 6.28   | 0.113  | 0.919 |
| PF3D7_1356500 | 17.5    | 0.103  | 0.918 | -5.53  | 0.408  | 0.919 |
| PF3D7_1307200 | -8.48   | 0.0827 | 0.918 | 3.04   | 0.242  | 0.919 |
| PF3D7_1372300 | 1.74    | 0.529  | 0.918 | -1.06  | 0.803  | 0.965 |
| PF3D7_0321600 | -0.566  | 0.894  | 0.98  | 0.0825 | 0.985  | 0.998 |
| PFC10_API0032 | -6.04   | 0.436  | 0.918 | 6.08   | 0.306  | 0.919 |
| PF3D7_1252800 | 0.265   | 0.703  | 0.931 | 2.46   | 0.164  | 0.919 |
| PF3D7_1407500 | 0.38    | 0.738  | 0.938 | -1.42  | 0.443  | 0.919 |
| PF3D7_1133900 | 2.21    | 0.283  | 0.918 | -1.29  | 0.559  | 0.927 |
| PF3D7_0710700 | -0.316  | 0.861  | 0.971 | -1.52  | 0.684  | 0.954 |
| PF3D7_0520500 | -2.65   | 0.416  | 0.918 | 2.46   | 0.461  | 0.919 |
| PFL1550w      | -16.2   | 0.0568 | 0.918 | 18.4   | 0.0457 | 0.919 |
| PF3D7_0519800 | -6.67   | 0.193  | 0.918 | 8.3    | 0.171  | 0.919 |
| PF3D7_1212000 | -7.77   | 0.207  | 0.918 | 6.53   | 0.236  | 0.919 |
| PF3D7_1032700 | 9.14    | 0.122  | 0.918 | 2.61   | 0.449  | 0.919 |
| PF3D7_1019600 | -0.974  | 0.585  | 0.918 | 1.96   | 0.53   | 0.924 |
| PF3D7_1475400 | 0.178   | 0.917  | 0.984 | 1      | 0.654  | 0.95  |
| PF3D7_1319300 | 3       | 0.442  | 0.918 | -3.61  | 0.429  | 0.919 |
| PF3D7_1208000 | -0.402  | 0.851  | 0.966 | 0.726  | 0.769  | 0.963 |
| PF3D7_1325400 | -0.329  | 0.934  | 0.987 | 0.0641 | 0.984  | 0.998 |
| PF3D7_1105200 | 1.77    | 0.391  | 0.918 | 0.988  | 0.788  | 0.964 |
| PF3D7_1115900 | -1.68   | 0.433  | 0.918 | 3.11   | 0.419  | 0.919 |
| PF3D7_0719500 | -1.11   | 0.636  | 0.919 | 1.62   | 0.512  | 0.924 |

|               |         |        |       |        |        |       |
|---------------|---------|--------|-------|--------|--------|-------|
| PF3D7_1030000 | -3.96   | 0.378  | 0.918 | 0.395  | 0.935  | 0.993 |
| PF3D7_1319400 | 1.08    | 0.38   | 0.918 | -2.39  | 0.215  | 0.919 |
| PF3D7_0918900 | -0.619  | 0.57   | 0.918 | 0.693  | 0.538  | 0.924 |
| PF3D7_1236400 | 0.696   | 0.772  | 0.943 | -1.19  | 0.629  | 0.946 |
| PF3D7_0823000 | -1.37   | 0.589  | 0.918 | 2.27   | 0.597  | 0.936 |
| PF3D7_1323200 | 0.754   | 0.656  | 0.921 | -2.16  | 0.434  | 0.919 |
| PF3D7_0519400 | 10.1    | 0.076  | 0.918 | -9.27  | 0.0752 | 0.919 |
| PF3D7_0102500 | 0.00163 | 1      | 1     | -0.483 | 0.897  | 0.982 |
| PF3D7_1028500 | -6.17   | 0.119  | 0.918 | 5.05   | 0.223  | 0.919 |
| PF3D7_0611800 | -0.393  | 0.453  | 0.918 | 0.998  | 0.456  | 0.919 |
| PF3D7_1215100 | -2.26   | 0.225  | 0.918 | 3.02   | 0.0782 | 0.919 |
| PF3D7_1459800 | 2.13    | 0.567  | 0.918 | 3.26   | 0.448  | 0.919 |
| PF3D7_1446900 | -1.82   | 0.693  | 0.928 | 9.41   | 0.219  | 0.919 |
| PF3D7_1417100 | -12.7   | 0.0944 | 0.918 | 12.3   | 0.0912 | 0.919 |
| PF3D7_1422300 | 1.56    | 0.618  | 0.919 | -0.788 | 0.664  | 0.952 |
| PF3D7_1220400 | 2.63    | 0.495  | 0.918 | -2.45  | 0.534  | 0.924 |
| PF3D7_1209900 | 2.27    | 0.499  | 0.918 | -2.04  | 0.539  | 0.924 |
| PF3D7_1441400 | -2.79   | 0.489  | 0.918 | 4.36   | 0.336  | 0.919 |
| PF3D7_0411400 | 1.75    | 0.558  | 0.918 | -1.53  | 0.682  | 0.954 |
| PF3D7_0309200 | -0.333  | 0.94   | 0.989 | 0.131  | 0.977  | 0.998 |
| PF3D7_1314600 | -4.94   | 0.141  | 0.918 | 5.94   | 0.117  | 0.919 |
| PF07_0089     | -0.0506 | 0.982  | 0.997 | 1.07   | 0.659  | 0.95  |
| PF3D7_1035100 | -2.42   | 0.443  | 0.918 | 3.12   | 0.35   | 0.919 |
| PF3D7_0416000 | -6.71   | 0.161  | 0.918 | 6.27   | 0.196  | 0.919 |
| PF3D7_0621100 | 0.41    | 0.858  | 0.969 | -0.769 | 0.752  | 0.961 |
| PF14_0361     | -4.99   | 0.261  | 0.918 | 7.7    | 0.145  | 0.919 |
| PF3D7_1413000 | -7.45   | 0.128  | 0.918 | 7.24   | 0.131  | 0.919 |
| PF3D7_1121000 | 3.88    | 0.288  | 0.918 | 0.18   | 0.965  | 0.996 |
| PF3D7_1016400 | 9.23    | 0.184  | 0.918 | -8.6   | 0.205  | 0.919 |
| PF3D7_1346400 | -0.0292 | 0.954  | 0.992 | 0.813  | 0.234  | 0.919 |
| PF3D7_1120600 | -8.01   | 0.169  | 0.918 | 2.42   | 0.618  | 0.942 |
| PF3D7_0623300 | 0.801   | 0.344  | 0.918 | -0.225 | 0.881  | 0.981 |
| PF3D7_1126600 | -4.61   | 0.146  | 0.918 | 4.28   | 0.155  | 0.919 |
| PF3D7_0211100 | -0.237  | 0.617  | 0.919 | -0.279 | 0.824  | 0.969 |
| PF3D7_1450500 | -2.69   | 0.484  | 0.918 | 1.48   | 0.703  | 0.954 |
| PF3D7_1361200 | -4.33   | 0.208  | 0.918 | 12.4   | 0.0954 | 0.919 |
| PF3D7_1303600 | -6.84   | 0.133  | 0.918 | 7.49   | 0.0844 | 0.919 |
| PF3D7_0820300 | -7.26   | 0.0926 | 0.918 | 6.66   | 0.0864 | 0.919 |
| PF3D7_0919500 | 3.45    | 0.361  | 0.918 | 2.88   | 0.402  | 0.919 |
| PF3D7_1123100 | 1.43    | 0.404  | 0.918 | -1.55  | 0.417  | 0.919 |
| PF3D7_1127300 | 4.83    | 0.304  | 0.918 | -2.62  | 0.524  | 0.924 |
| PF3D7_1117800 | 4.79    | 0.295  | 0.918 | -4.43  | 0.32   | 0.919 |
| PF3D7_0523300 | -1.42   | 0.49   | 0.918 | -1.18  | 0.763  | 0.962 |
| PF3D7_1111600 | -1.32   | 0.494  | 0.918 | 1.97   | 0.392  | 0.919 |
| PF3D7_0904900 | -0.0694 | 0.933  | 0.987 | 9.39   | 0.0816 | 0.919 |
| PF3D7_0819400 | -1.76   | 0.418  | 0.918 | 3.23   | 0.176  | 0.919 |
| PF3D7_0817300 | 0.0897  | 0.95   | 0.992 | -0.558 | 0.739  | 0.958 |

|               |        |       |       |        |        |       |
|---------------|--------|-------|-------|--------|--------|-------|
| PF3D7_0400200 | -3690  | 0.996 | 0.999 | 3640   | 0.996  | 0.999 |
| PF3D7_1234600 | -0.736 | 0.704 | 0.932 | 1.34   | 0.475  | 0.919 |
| PF3D7_1364900 | 1.5    | 0.67  | 0.923 | -3.7   | 0.358  | 0.919 |
| PF3D7_0802200 | 1.36   | 0.8   | 0.953 | -3.81  | 0.463  | 0.919 |
| PF3D7_1205400 | -0.617 | 0.719 | 0.937 | 0.973  | 0.66   | 0.95  |
| PF3D7_1310400 | 4.69   | 0.193 | 0.918 | -5.02  | 0.231  | 0.919 |
| PF3D7_1354100 | -0.477 | 0.716 | 0.935 | 0.433  | 0.892  | 0.982 |
| PF3D7_0629900 | 0.807  | 0.573 | 0.918 | 1.17   | 0.577  | 0.933 |
| PF3D7_1455700 | 0.609  | 0.535 | 0.918 | -0.117 | 0.944  | 0.994 |
| PF3D7_0925900 | 2.28   | 0.426 | 0.918 | 1.92   | 0.439  | 0.919 |
| PF3D7_0527400 | -0.511 | 0.854 | 0.967 | 0.832  | 0.778  | 0.963 |
| PFL0210c      | -2.04  | 0.624 | 0.919 | 7.23   | 0.0863 | 0.919 |
| PF3D7_0609900 | -3.06  | 0.258 | 0.918 | 4.05   | 0.19   | 0.919 |
| PF3D7_1249200 | -1.01  | 0.764 | 0.941 | 0.525  | 0.863  | 0.98  |
| PF3D7_1472400 | 1.44   | 0.557 | 0.918 | 2.68   | 0.575  | 0.933 |
| PF3D7_1472700 | -13.4  | 0.062 | 0.918 | 5.26   | 0.177  | 0.919 |
| PF3D7_0913100 | -5.47  | 0.128 | 0.918 | 2.94   | 0.489  | 0.921 |
| PF3D7_1452300 | 4.63   | 0.243 | 0.918 | -3.1   | 0.15   | 0.919 |
| PF3D7_1138200 | 3.26   | 0.356 | 0.918 | 2.07   | 0.518  | 0.924 |
| PF3D7_1022700 | -3.92  | 0.167 | 0.918 | 4.59   | 0.162  | 0.919 |
| PF3D7_1112900 | -6.41  | 0.394 | 0.918 | 6.68   | 0.387  | 0.919 |
| PF3D7_0831700 | 3.58   | 0.401 | 0.918 | -7.76  | 0.174  | 0.919 |
| PF3D7_1315700 | -3.99  | 0.203 | 0.918 | -0.522 | 0.771  | 0.963 |
| PF3D7_0800700 | -6.36  | 0.144 | 0.918 | 4.2    | 0.313  | 0.919 |
| PF3D7_1412500 | -10    | 0.108 | 0.918 | 8.92   | 0.123  | 0.919 |
| PF3D7_1403200 | 6.06   | 0.308 | 0.918 | -3.34  | 0.432  | 0.919 |
| PF3D7_0927800 | 3.25   | 0.294 | 0.918 | -2.02  | 0.416  | 0.919 |
| PF3D7_1479400 | -1.68  | 0.555 | 0.918 | 1.02   | 0.707  | 0.954 |
| PF3D7_1218500 | -2.98  | 0.431 | 0.918 | 5.11   | 0.324  | 0.919 |
| PF3D7_0518400 | 1.06   | 0.625 | 0.919 | -3.29  | 0.471  | 0.919 |
| PF3D7_0830400 | -0.753 | 0.606 | 0.918 | 7.69   | 0.122  | 0.919 |
| PF3D7_1438400 | 3.83   | 0.358 | 0.918 | -3.35  | 0.42   | 0.919 |
| PF3D7_1241100 | -8.06  | 0.135 | 0.918 | 8.23   | 0.12   | 0.919 |
| PF3D7_0732500 | 2.17   | 0.627 | 0.919 | -2.3   | 0.594  | 0.936 |
| PF3D7_1307700 | 3.25   | 0.273 | 0.918 | -3.9   | 0.243  | 0.919 |
| PF3D7_0210400 | -1.72  | 0.619 | 0.919 | 1.25   | 0.738  | 0.957 |
| PF3D7_0700800 | 2.07   | 0.519 | 0.918 | 1.58   | 0.598  | 0.936 |
| PF3D7_1346700 | 2.93   | 0.447 | 0.918 | -1.27  | 0.76   | 0.962 |
| PF3D7_0817600 | 0.59   | 0.919 | 0.984 | -1.53  | 0.784  | 0.963 |
| PF3D7_1350600 | -0.19  | 0.954 | 0.992 | 2.35   | 0.482  | 0.92  |
| PF3D7_0207300 | 1.26   | 0.582 | 0.918 | 0.602  | 0.776  | 0.963 |
| PF3D7_1133500 | -0.413 | 0.857 | 0.969 | 3.45   | 0.27   | 0.919 |
| PF3D7_0216500 | -0.851 | 0.537 | 0.918 | 3.72   | 0.277  | 0.919 |
| PF3D7_1342600 | -1.31  | 0.602 | 0.918 | 0.963  | 0.737  | 0.957 |
| PF3D7_0423900 | 0.87   | 0.575 | 0.918 | -1.37  | 0.788  | 0.964 |
| PF3D7_0927600 | 14.2   | 0.111 | 0.918 | -21.3  | 0.0908 | 0.919 |
| PF3D7_1316500 | -4.03  | 0.308 | 0.918 | 2.71   | 0.686  | 0.954 |



|               |         |        |       |        |        |       |
|---------------|---------|--------|-------|--------|--------|-------|
| PF3D7_1121500 | -0.638  | 0.737  | 0.938 | -0.677 | 0.87   | 0.981 |
| PF3D7_1226900 | -2.55   | 0.405  | 0.918 | 3.2    | 0.275  | 0.919 |
| PF3D7_0627500 | -21.6   | 0.0737 | 0.918 | 19.6   | 0.0776 | 0.919 |
| PF3D7_1455300 | 9.66    | 0.0905 | 0.918 | -3.67  | 0.434  | 0.919 |
| PF3D7_1435000 | 10.1    | 0.0619 | 0.918 | -6.14  | 0.119  | 0.919 |
| PF3D7_1352300 | -0.689  | 0.892  | 0.98  | 1.23   | 0.8    | 0.965 |
| PF3D7_1140500 | 1.08    | 0.806  | 0.953 | -0.242 | 0.955  | 0.994 |
| PF3D7_1253500 | -1.01   | 0.828  | 0.959 | 1.08   | 0.806  | 0.967 |
| PF3D7_1110900 | -0.341  | 0.934  | 0.987 | 0.629  | 0.876  | 0.981 |
| PF3D7_1430500 | -4.49   | 0.196  | 0.918 | 5.38   | 0.136  | 0.919 |
| PF3D7_0305600 | -0.833  | 0.463  | 0.918 | 0.605  | 0.681  | 0.954 |
| PF3D7_1013700 | 3.27    | 0.576  | 0.918 | 3.75   | 0.533  | 0.924 |
| PFB0690w      | 8.4     | 0.0858 | 0.918 | -7.98  | 0.126  | 0.919 |
| PF3D7_0813700 | 7.51    | 0.187  | 0.918 | -7.49  | 0.196  | 0.919 |
| PF3D7_1313100 | -1.39   | 0.386  | 0.918 | 9.78   | 0.0946 | 0.919 |
| PF3D7_1309600 | 8.93    | 0.183  | 0.918 | -10.2  | 0.117  | 0.919 |
| PFI1015w      | 0.0794  | 0.969  | 0.994 | -0.104 | 0.951  | 0.994 |
| PF3D7_0628900 | 3.37    | 0.321  | 0.918 | -3.36  | 0.317  | 0.919 |
| PF3D7_1107600 | -0.0883 | 0.921  | 0.985 | 0.86   | 0.441  | 0.919 |
| PF3D7_0212100 | -2.41   | 0.185  | 0.918 | 5.7    | 0.113  | 0.919 |
| PF3D7_0511500 | 0.0172  | 0.99   | 0.999 | 0.294  | 0.737  | 0.957 |
| PF3D7_1452000 | -0.97   | 0.497  | 0.918 | 1.29   | 0.41   | 0.919 |
| PF3D7_1342300 | 0.538   | 0.728  | 0.937 | -0.889 | 0.674  | 0.954 |
| PF3D7_0812100 | -0.656  | 0.327  | 0.918 | 1.7    | 0.446  | 0.919 |
| PF3D7_0721000 | 0.692   | 0.457  | 0.918 | 1.51   | 0.316  | 0.919 |
| PF3D7_0105700 | -0.595  | 0.703  | 0.931 | -0.632 | 0.732  | 0.957 |
| PF3D7_1301600 | -0.245  | 0.85   | 0.966 | 1.53   | 0.337  | 0.919 |
| PF3D7_1224600 | 4.78    | 0.216  | 0.918 | -3.56  | 0.489  | 0.921 |
| PF3D7_0632200 | 0.612   | 0.301  | 0.918 | -0.865 | 0.29   | 0.919 |
| PF3D7_0522400 | -1.31   | 0.308  | 0.918 | 2.33   | 0.186  | 0.919 |
| PF3D7_1303500 | -4.01   | 0.458  | 0.918 | -0.278 | 0.958  | 0.994 |
| PF3D7_1020600 | -2.66   | 0.407  | 0.918 | 4.14   | 0.42   | 0.919 |
| PF3D7_0800300 | -2.65   | 0.256  | 0.918 | 3.59   | 0.116  | 0.919 |
| PF3D7_1340000 | -2.96   | 0.443  | 0.918 | 0.702  | 0.889  | 0.982 |
| PF3D7_0628300 | -0.894  | 0.764  | 0.941 | 3.21   | 0.462  | 0.919 |
| PF3D7_1417000 | -0.211  | 0.764  | 0.941 | 0.902  | 0.458  | 0.919 |
| PF3D7_1002000 | 1.25    | 0.797  | 0.952 | 1.88   | 0.662  | 0.951 |
| PF3D7_0902700 | -10.5   | 0.0832 | 0.918 | 10     | 0.0926 | 0.919 |
| PF3D7_1138400 | 0.0818  | 0.889  | 0.979 | -0.129 | 0.927  | 0.989 |
| PF3D7_1363300 | 2.28    | 0.477  | 0.918 | -2.29  | 0.484  | 0.92  |
| PF3D7_1310300 | -0.55   | 0.905  | 0.98  | 5.52   | 0.329  | 0.919 |
| PF3D7_0905600 | -6.39   | 0.0505 | 0.918 | 4.94   | 0.0701 | 0.919 |
| PF3D7_1421500 | -5.22   | 0.2    | 0.918 | 4.47   | 0.246  | 0.919 |
| PF3D7_0711200 | 0.0298  | 0.933  | 0.987 | -0.156 | 0.839  | 0.974 |
| PF3D7_1319700 | 0.639   | 0.867  | 0.973 | -0.493 | 0.863  | 0.98  |
| PF3D7_0800500 | -2.26   | 0.464  | 0.918 | 2.08   | 0.48   | 0.92  |
| PF3D7_1018600 | 4.83    | 0.318  | 0.918 | -3.2   | 0.37   | 0.919 |

|               |         |        |       |        |        |       |
|---------------|---------|--------|-------|--------|--------|-------|
| PF3D7_1251000 | -4.71   | 0.235  | 0.918 | 9.42   | 0.132  | 0.919 |
| PF3D7_1113000 | 1.33    | 0.279  | 0.918 | -1.33  | 0.283  | 0.919 |
| PF3D7_1026300 | -8.61   | 0.25   | 0.918 | 13.5   | 0.0725 | 0.919 |
| PF3D7_0322000 | 1.65    | 0.539  | 0.918 | 2.08   | 0.635  | 0.948 |
| PF3D7_0909600 | 3.16    | 0.208  | 0.918 | -0.419 | 0.823  | 0.969 |
| PF3D7_1426400 | -2.01   | 0.486  | 0.918 | 0.551  | 0.884  | 0.981 |
| PF3D7_1327200 | 2.59    | 0.502  | 0.918 | -0.654 | 0.862  | 0.98  |
| PF3D7_1403300 | 7.19    | 0.0844 | 0.918 | -9.23  | 0.076  | 0.919 |
| PF3D7_1032600 | 5.88    | 0.208  | 0.918 | -4.41  | 0.259  | 0.919 |
| PF3D7_0513300 | 9.09    | 0.065  | 0.918 | -5.96  | 0.0918 | 0.919 |
| PF3D7_1101300 | -1.49   | 0.432  | 0.918 | 2.65   | 0.239  | 0.919 |
| PF3D7_0316000 | 12.7    | 0.128  | 0.918 | -9.96  | 0.0838 | 0.919 |
| PF3D7_0531000 | 6.19    | 0.214  | 0.918 | -4.07  | 0.379  | 0.919 |
| PF3D7_1243300 | 2.08    | 0.421  | 0.918 | -3.25  | 0.351  | 0.919 |
| PF14_0104     | -1.21   | 0.627  | 0.919 | 2.13   | 0.392  | 0.919 |
| PF3D7_1222100 | -1.71   | 0.487  | 0.918 | 5.03   | 0.173  | 0.919 |
| PF3D7_0932100 | -3.83   | 0.308  | 0.918 | 3.32   | 0.369  | 0.919 |
| PF10_0252     | 12.7    | 0.0831 | 0.918 | -13.3  | 0.0781 | 0.919 |
| PF3D7_0822000 | 1.64    | 0.7    | 0.931 | -5.06  | 0.265  | 0.919 |
| PF3D7_1465600 | -0.945  | 0.86   | 0.971 | 1.1    | 0.868  | 0.981 |
| PF3D7_0417000 | 3.87    | 0.426  | 0.918 | 0.309  | 0.942  | 0.994 |
| PF3D7_0702000 | -3.4    | 0.521  | 0.918 | 2.71   | 0.6    | 0.937 |
| PF3D7_1366100 | 1.08    | 0.604  | 0.918 | -2.46  | 0.598  | 0.936 |
| PF3D7_1225200 | 0.359   | 0.804  | 0.953 | -1.07  | 0.567  | 0.931 |
| PF3D7_1324500 | 2.56    | 0.425  | 0.918 | -1.48  | 0.673  | 0.954 |
| PF3D7_0521600 | -8.13   | 0.204  | 0.918 | 8.64   | 0.19   | 0.919 |
| PF3D7_1119700 | -0.269  | 0.636  | 0.919 | 0.282  | 0.796  | 0.965 |
| PF3D7_1312800 | -1.38   | 0.678  | 0.923 | 1.02   | 0.742  | 0.958 |
| PF3D7_0624100 | -6.15   | 0.157  | 0.918 | 5.45   | 0.171  | 0.919 |
| PF3D7_1333300 | 1.98    | 0.5    | 0.918 | -0.994 | 0.682  | 0.954 |
| PF3D7_1464600 | 0.366   | 0.647  | 0.919 | -1.38  | 0.413  | 0.919 |
| PF3D7_1335700 | 1.74    | 0.311  | 0.918 | -2.45  | 0.297  | 0.919 |
| PF3D7_1423800 | 1.22    | 0.61   | 0.919 | 3.7    | 0.374  | 0.919 |
| PF3D7_1205500 | -0.435  | 0.397  | 0.918 | 0.834  | 0.277  | 0.919 |
| PF3D7_0725400 | 1.2     | 0.851  | 0.966 | 1.75   | 0.754  | 0.962 |
| PF3D7_1104100 | -3.13   | 0.477  | 0.918 | 2.96   | 0.465  | 0.919 |
| PF3D7_1433300 | -0.427  | 0.924  | 0.985 | 2.52   | 0.508  | 0.924 |
| PF3D7_0105400 | -0.611  | 0.752  | 0.94  | 3.38   | 0.224  | 0.919 |
| PF3D7_1457000 | 2.24    | 0.507  | 0.918 | 1.61   | 0.624  | 0.943 |
| PF3D7_0512900 | -1.01   | 0.647  | 0.919 | -0.413 | 0.887  | 0.982 |
| PF3D7_0912200 | 0.448   | 0.914  | 0.984 | 1.58   | 0.711  | 0.957 |
| PF3D7_0717800 | 5.56    | 0.189  | 0.918 | -5.17  | 0.225  | 0.919 |
| PF3D7_1035600 | -0.567  | 0.814  | 0.953 | 1.74   | 0.521  | 0.924 |
| PF3D7_1442200 | -0.0466 | 0.991  | 0.999 | 8.33   | 0.253  | 0.919 |
| PF3D7_1232100 | -4.85   | 0.208  | 0.918 | 5.86   | 0.119  | 0.919 |
| PF3D7_0918600 | -0.0816 | 0.968  | 0.993 | 1.79   | 0.585  | 0.933 |
| PF3D7_0728800 | -0.158  | 0.791  | 0.949 | 0.545  | 0.527  | 0.924 |

|               |         |        |       |         |        |       |
|---------------|---------|--------|-------|---------|--------|-------|
| PF3D7_0322100 | 0.36    | 0.84   | 0.962 | -0.0165 | 0.992  | 0.998 |
| PF3D7_1252300 | -9.41   | 0.22   | 0.918 | 9.6     | 0.212  | 0.919 |
| PF3D7_0304900 | 45.7    | 0.0601 | 0.918 | -34.1   | 0.0551 | 0.919 |
| PF3D7_1019900 | 5.14    | 0.172  | 0.918 | -3.46   | 0.278  | 0.919 |
| PF3D7_1134200 | -0.157  | 0.966  | 0.993 | 2.32    | 0.603  | 0.937 |
| PF3D7_1015500 | -0.0879 | 0.878  | 0.978 | 1.36    | 0.28   | 0.919 |
| PF3D7_1038700 | 1.79    | 0.562  | 0.918 | 1.34    | 0.732  | 0.957 |
| PF3D7_1401500 | -3.99   | 0.393  | 0.918 | 12.1    | 0.107  | 0.919 |
| PF3D7_0808900 | 1.9     | 0.462  | 0.918 | -1.74   | 0.494  | 0.921 |
| PF3D7_1468000 | 12.5    | 0.169  | 0.918 | -6.04   | 0.212  | 0.919 |
| PF3D7_1221500 | -6.39   | 0.146  | 0.918 | 5.96    | 0.122  | 0.919 |
| PF3D7_1223400 | -2.34   | 0.401  | 0.918 | 2.63    | 0.467  | 0.919 |
| PF3D7_0518500 | 2.65    | 0.466  | 0.918 | -3.49   | 0.389  | 0.919 |
| PF3D7_1131000 | -0.343  | 0.918  | 0.984 | 0.265   | 0.939  | 0.994 |
| PF3D7_0313700 | -1.21   | 0.705  | 0.932 | 1.77    | 0.701  | 0.954 |
| PF3D7_1434300 | -4.75   | 0.252  | 0.918 | 4.43    | 0.256  | 0.919 |
| PF3D7_1110300 | -1.2    | 0.717  | 0.935 | 1.21    | 0.772  | 0.963 |
| PF3D7_0921500 | -19.3   | 0.0746 | 0.918 | 10.6    | 0.206  | 0.919 |
| PF3D7_0306000 | -8.85   | 0.212  | 0.918 | 4.89    | 0.362  | 0.919 |
| PF3D7_0612100 | -1.96   | 0.454  | 0.918 | 4.81    | 0.388  | 0.919 |
| PF3D7_0308800 | -0.541  | 0.821  | 0.956 | 0.269   | 0.881  | 0.981 |
| PF3D7_0302100 | -0.935  | 0.547  | 0.918 | 0.431   | 0.807  | 0.967 |
| PF3D7_1243900 | 2.72    | 0.206  | 0.918 | 0.627   | 0.72   | 0.957 |
| PF3D7_1418300 | 0.54    | 0.823  | 0.957 | -0.195  | 0.944  | 0.994 |
| PF3D7_0307700 | -1.45   | 0.567  | 0.918 | 0.49    | 0.888  | 0.982 |
| PF3D7_0402200 | -2.52   | 0.279  | 0.918 | 1.99    | 0.353  | 0.919 |
| PF3D7_1403800 | 0.918   | 0.768  | 0.942 | -4.25   | 0.233  | 0.919 |
| PF3D7_1311100 | -12.3   | 0.0871 | 0.918 | 10.4    | 0.166  | 0.919 |
| PF3D7_1414200 | 6.54    | 0.126  | 0.918 | -4.42   | 0.197  | 0.919 |
| PF3D7_0818200 | -1.84   | 0.576  | 0.918 | 4.73    | 0.227  | 0.919 |
| PF3D7_0313800 | 0.923   | 0.232  | 0.918 | 0.858   | 0.506  | 0.924 |
| PF3D7_1300500 | -6      | 0.166  | 0.918 | 6.44    | 0.149  | 0.919 |
| PF3D7_1128100 | -7.57   | 0.134  | 0.918 | 5.41    | 0.267  | 0.919 |
| PF3D7_1118000 | 2.22    | 0.577  | 0.918 | 0.466   | 0.881  | 0.981 |
| PF3D7_1242100 | -3.35   | 0.493  | 0.918 | 0.851   | 0.887  | 0.982 |
| PF3D7_0321800 | -0.72   | 0.735  | 0.937 | -3.63   | 0.229  | 0.919 |
| PF3D7_1112700 | -0.892  | 0.726  | 0.937 | 0.791   | 0.779  | 0.963 |
| PF3D7_0209300 | -1.2    | 0.698  | 0.931 | 2.82    | 0.424  | 0.919 |
| PF3D7_1346300 | -1.63   | 0.642  | 0.919 | 5.25    | 0.196  | 0.919 |
| PF3D7_0920200 | -3.23   | 0.498  | 0.918 | -0.719  | 0.865  | 0.981 |
| PF3D7_0932600 | -0.496  | 0.715  | 0.935 | 0.539   | 0.901  | 0.984 |
| PF3D7_0302600 | -0.765  | 0.633  | 0.919 | 1.97    | 0.361  | 0.919 |
| PF3D7_0317200 | 2.5     | 0.437  | 0.918 | -3.31   | 0.318  | 0.919 |
| PF3D7_1137500 | 2.03    | 0.594  | 0.918 | -2.31   | 0.542  | 0.924 |
| PF3D7_1360000 | -2.82   | 0.583  | 0.918 | 2.17    | 0.63   | 0.946 |
| PF3D7_1332700 | 1.95    | 0.554  | 0.918 | -3.08   | 0.513  | 0.924 |
| PF3D7_1223000 | -1.34   | 0.567  | 0.918 | -0.463  | 0.917  | 0.987 |

|               |        |        |       |         |        |       |
|---------------|--------|--------|-------|---------|--------|-------|
| PF3D7_1369700 | 1.69   | 0.479  | 0.918 | -4.67   | 0.387  | 0.919 |
| PF3D7_0210200 | 0.156  | 0.781  | 0.945 | 0.476   | 0.48   | 0.92  |
| PF3D7_0725200 | -0.681 | 0.641  | 0.919 | 0.752   | 0.816  | 0.968 |
| PF3D7_1014100 | -0.201 | 0.647  | 0.919 | 0.944   | 0.168  | 0.919 |
| PF3D7_0904500 | -1.8   | 0.465  | 0.918 | -1.91   | 0.678  | 0.954 |
| PF3D7_0611900 | 1.28   | 0.613  | 0.919 | -1.69   | 0.561  | 0.928 |
| PF3D7_0619600 | -15.1  | 0.0315 | 0.918 | 8.58    | 0.163  | 0.919 |
| PF3D7_0502600 | 1.19   | 0.501  | 0.918 | -0.142  | 0.948  | 0.994 |
| PF3D7_1219000 | -0.12  | 0.869  | 0.974 | -0.0926 | 0.917  | 0.987 |
| PF3D7_0613700 | 1.41   | 0.747  | 0.94  | -0.341  | 0.933  | 0.992 |
| PF3D7_1358400 | -25.7  | 0.107  | 0.918 | 32.3    | 0.0904 | 0.919 |
| PF3D7_0904200 | 6.49   | 0.161  | 0.918 | -1.89   | 0.57   | 0.931 |
| PFI1510w      | 1.63   | 0.613  | 0.919 | -7.68   | 0.145  | 0.919 |
| PF3D7_0401000 | -0.367 | 0.723  | 0.937 | 1.82    | 0.198  | 0.919 |
| PF3D7_0709900 | 0.373  | 0.796  | 0.952 | -0.632  | 0.657  | 0.95  |
| PF3D7_1237000 | 4.76   | 0.315  | 0.918 | -1.82   | 0.763  | 0.962 |
| PF3D7_1315200 | 1.12   | 0.753  | 0.94  | -6.06   | 0.299  | 0.919 |
| PF3D7_0826100 | -0.391 | 0.581  | 0.918 | 0.31    | 0.796  | 0.965 |
| PF3D7_1003900 | -0.41  | 0.752  | 0.94  | 0.205   | 0.947  | 0.994 |
| PF3D7_0411900 | -1.98  | 0.73   | 0.937 | 1.6     | 0.785  | 0.963 |
| PF3D7_1427600 | -10.5  | 0.152  | 0.918 | 11.6    | 0.132  | 0.919 |
| PF3D7_1305900 | -1.65  | 0.391  | 0.918 | 2.08    | 0.283  | 0.919 |
| PF3D7_0815400 | -3.97  | 0.311  | 0.918 | 3.82    | 0.289  | 0.919 |
| PF3D7_0917600 | -1.48  | 0.853  | 0.967 | -0.384  | 0.969  | 0.998 |
| PF3D7_1321700 | 3.86   | 0.226  | 0.918 | 1.22    | 0.661  | 0.95  |
| PF3D7_0723600 | -6.43  | 0.338  | 0.918 | 8.22    | 0.141  | 0.919 |
| PF3D7_0401600 | 0.59   | 0.707  | 0.933 | 0.0179  | 0.992  | 0.998 |
| PF3D7_1221900 | -0.902 | 0.406  | 0.918 | -2.07   | 0.429  | 0.919 |
| PF3D7_1020200 | -0.066 | 0.979  | 0.997 | 3.59    | 0.249  | 0.919 |
| PF3D7_0603100 | -3.25  | 0.29   | 0.918 | 0.485   | 0.889  | 0.982 |
| PF3D7_0934800 | 0.0901 | 0.977  | 0.996 | 0.87    | 0.803  | 0.965 |
| PF3D7_0609800 | 3.39   | 0.39   | 0.918 | 0.485   | 0.909  | 0.984 |
| PF3D7_0208900 | 3.52   | 0.425  | 0.918 | -2.29   | 0.58   | 0.933 |
| PF3D7_1401800 | -9.73  | 0.0875 | 0.918 | 10.8    | 0.0833 | 0.919 |
| PF3D7_1041100 | 2.49   | 0.161  | 0.918 | -0.467  | 0.615  | 0.942 |
| PF3D7_1254800 | -4.42  | 0.3    | 0.918 | 5.91    | 0.302  | 0.919 |
| PF3D7_0525200 | 0.243  | 0.794  | 0.95  | 0.5     | 0.743  | 0.958 |
| PF3D7_1130900 | -4.24  | 0.446  | 0.918 | 2.06    | 0.653  | 0.95  |
| PF3D7_0907200 | -0.496 | 0.537  | 0.918 | 0.595   | 0.523  | 0.924 |
| PF3D7_0413500 | -11.6  | 0.033  | 0.918 | 5.81    | 0.149  | 0.919 |
| PF3D7_0408100 | 4.15   | 0.204  | 0.918 | -5.05   | 0.189  | 0.919 |
| PF3D7_0714200 | -1.18  | 0.345  | 0.918 | 2.26    | 0.223  | 0.919 |
| PF3D7_0629300 | -2.52  | 0.238  | 0.918 | 3.59    | 0.1    | 0.919 |
| PF3D7_1427800 | 6.73   | 0.152  | 0.918 | -7      | 0.237  | 0.919 |
| PF3D7_1428000 | 3.73   | 0.278  | 0.918 | -4.57   | 0.265  | 0.919 |
| PF3D7_1234400 | 0.898  | 0.747  | 0.94  | -0.429  | 0.891  | 0.982 |
| PF3D7_1023800 | 5.84   | 0.211  | 0.918 | -6.08   | 0.127  | 0.919 |

|               |         |        |       |         |        |       |
|---------------|---------|--------|-------|---------|--------|-------|
| PF3D7_1253000 | 3.32    | 0.295  | 0.918 | -2.61   | 0.46   | 0.919 |
| PF3D7_0201700 | -2.55   | 0.386  | 0.918 | 2.97    | 0.334  | 0.919 |
| PF3D7_1118400 | -15.2   | 0.257  | 0.918 | 8.22    | 0.328  | 0.919 |
| PF3D7_1447900 | 3.24    | 0.37   | 0.918 | -4.32   | 0.261  | 0.919 |
| PF3D7_1008900 | 4.09    | 0.375  | 0.918 | -2.1    | 0.545  | 0.924 |
| PF3D7_1445300 | -1.95   | 0.362  | 0.918 | 2.42    | 0.294  | 0.919 |
| PF3D7_0517300 | -0.436  | 0.887  | 0.979 | 2.01    | 0.485  | 0.92  |
| PF3D7_1108100 | 0.706   | 0.604  | 0.918 | -0.116  | 0.904  | 0.984 |
| PF3D7_0408300 | 2.41    | 0.724  | 0.937 | -2.11   | 0.771  | 0.963 |
| PF3D7_0703500 | -0.123  | 0.895  | 0.98  | -0.0496 | 0.958  | 0.994 |
| PF3D7_1228700 | -1.27   | 0.168  | 0.918 | 3.42    | 0.147  | 0.919 |
| PF3D7_1460500 | 2.74    | 0.482  | 0.918 | -3.57   | 0.357  | 0.919 |
| PF3D7_1322900 | -1.41   | 0.583  | 0.918 | 0.924   | 0.881  | 0.981 |
| PF3D7_1233100 | 3.2     | 0.322  | 0.918 | -3.66   | 0.296  | 0.919 |
| PF3D7_1422500 | -1.38   | 0.581  | 0.918 | 5.14    | 0.122  | 0.919 |
| PF3D7_0417200 | 6.41    | 0.352  | 0.918 | -1.76   | 0.736  | 0.957 |
| PF3D7_1254300 | 0.42    | 0.727  | 0.937 | -0.0153 | 0.99   | 0.998 |
| PF14_0270     | 5.44    | 0.153  | 0.918 | -3.05   | 0.306  | 0.919 |
| PF3D7_1343500 | -1.41   | 0.273  | 0.918 | -0.112  | 0.935  | 0.993 |
| PF3D7_0506300 | 0.924   | 0.374  | 0.918 | 0.712   | 0.525  | 0.924 |
| PF3D7_1149900 | 0.255   | 0.806  | 0.953 | 1.68    | 0.288  | 0.919 |
| PF3D7_0520200 | -0.973  | 0.448  | 0.918 | -0.424  | 0.794  | 0.965 |
| PF3D7_1449000 | -1.66   | 0.667  | 0.923 | -1.43   | 0.764  | 0.962 |
| PF3D7_0709800 | 0.0617  | 0.97   | 0.994 | -0.39   | 0.862  | 0.98  |
| PF3D7_1106300 | -5.36   | 0.0939 | 0.918 | 5.23    | 0.0916 | 0.919 |
| PF3D7_0936400 | 1.02    | 0.356  | 0.918 | -1.6    | 0.47   | 0.919 |
| PF3D7_0911300 | -0.0854 | 0.865  | 0.972 | 0.694   | 0.197  | 0.919 |
| PF3D7_1139700 | 0.699   | 0.881  | 0.978 | 0.3     | 0.942  | 0.994 |
| PF3D7_1476800 | -1.66   | 0.208  | 0.918 | 2.04    | 0.233  | 0.919 |
| PF3D7_0311600 | 7.29    | 0.117  | 0.918 | -4.53   | 0.247  | 0.919 |
| PF3D7_0628400 | -2.45   | 0.711  | 0.933 | 0.478   | 0.937  | 0.994 |
| PF3D7_1222500 | -4.93   | 0.417  | 0.918 | 2.85    | 0.686  | 0.954 |
| PF3D7_1017300 | 0.00332 | 0.997  | 0.999 | -1.03   | 0.631  | 0.946 |
| PF3D7_1011900 | 4.07    | 0.424  | 0.918 | -2.17   | 0.705  | 0.954 |
| PF3D7_0109600 | 3.53    | 0.345  | 0.918 | -4.12   | 0.402  | 0.919 |
| PF3D7_0213900 | -3.02   | 0.397  | 0.918 | 3.31    | 0.373  | 0.919 |
| PF3D7_1025000 | -2.51   | 0.372  | 0.918 | 1.67    | 0.715  | 0.957 |
| PF3D7_0936300 | -1.3    | 0.391  | 0.918 | 1.87    | 0.289  | 0.919 |
| PF3D7_1368300 | 1.15    | 0.727  | 0.937 | -0.526  | 0.704  | 0.954 |
| PF3D7_1245100 | -3.72   | 0.141  | 0.918 | 3.12    | 0.383  | 0.919 |
| PF3D7_1212300 | 3.71    | 0.403  | 0.918 | -2.41   | 0.596  | 0.936 |
| PF3D7_0713600 | 0.0426  | 0.983  | 0.998 | 0.876   | 0.74   | 0.958 |
| PF3D7_1339800 | -0.376  | 0.774  | 0.943 | -1.12   | 0.667  | 0.954 |
| PF3D7_1317400 | -3.64   | 0.182  | 0.918 | 9.71    | 0.0869 | 0.919 |
| PF3D7_0724300 | -4.65   | 0.468  | 0.918 | 6.32    | 0.294  | 0.919 |
| PF3D7_1246100 | -0.405  | 0.89   | 0.979 | -1.22   | 0.44   | 0.919 |
| PF3D7_0607800 | -17     | 0.0553 | 0.918 | 19.9    | 0.0567 | 0.919 |

|               |         |       |       |        |        |       |
|---------------|---------|-------|-------|--------|--------|-------|
| PF3D7_0417300 | 0.308   | 0.772 | 0.943 | 0.41   | 0.76   | 0.962 |
| PF3D7_1101500 | -1.56   | 0.4   | 0.918 | 3.8    | 0.192  | 0.919 |
| PF3D7_0410500 | 5.15    | 0.188 | 0.918 | -6.23  | 0.167  | 0.919 |
| PF3D7_1142600 | -5.96   | 0.212 | 0.918 | 4.48   | 0.255  | 0.919 |
| PF3D7_0727300 | -3.61   | 0.24  | 0.918 | 4.65   | 0.225  | 0.919 |
| PF3D7_1368100 | 1.37    | 0.623 | 0.919 | -0.777 | 0.821  | 0.968 |
| PF3D7_0934100 | -0.241  | 0.888 | 0.979 | 0.965  | 0.583  | 0.933 |
| PF3D7_0407900 | -3.66   | 0.243 | 0.918 | 2.86   | 0.348  | 0.919 |
| PF3D7_1039900 | -1      | 0.531 | 0.918 | 4.66   | 0.174  | 0.919 |
| PF3D7_1351700 | 3.1     | 0.384 | 0.918 | -3.46  | 0.34   | 0.919 |
| PF3D7_1203200 | 0.159   | 0.968 | 0.993 | -3.79  | 0.354  | 0.919 |
| PF3D7_1029100 | 4.12    | 0.438 | 0.918 | -3.66  | 0.475  | 0.919 |
| PF3D7_1309200 | 1.22    | 0.684 | 0.925 | -3.49  | 0.323  | 0.919 |
| PF3D7_0908300 | 3.82    | 0.466 | 0.918 | 0.122  | 0.973  | 0.998 |
| PFC10_API0012 | 20.2    | 0.112 | 0.918 | -1.6   | 0.759  | 0.962 |
| PF3D7_1403100 | 0.175   | 0.921 | 0.985 | 0.0253 | 0.985  | 0.998 |
| PF3D7_1147000 | -4.36   | 0.274 | 0.918 | 5.77   | 0.231  | 0.919 |
| PFL2215w      | -2.22   | 0.441 | 0.918 | 5.03   | 0.169  | 0.919 |
| PF13_0033     | -0.291  | 0.939 | 0.989 | 2.37   | 0.616  | 0.942 |
| PF3D7_0828900 | -3.47   | 0.329 | 0.918 | 1.73   | 0.721  | 0.957 |
| PF3D7_1125600 | -1.32   | 0.652 | 0.92  | 1.31   | 0.686  | 0.954 |
| PF3D7_1312500 | -1.52   | 0.723 | 0.937 | 1.19   | 0.771  | 0.963 |
| PF3D7_1426800 | 0.581   | 0.278 | 0.918 | 0.402  | 0.51   | 0.924 |
| PF3D7_0324600 | 2.05    | 0.398 | 0.918 | 6.14   | 0.212  | 0.919 |
| PFC10_API0042 | -0.0149 | 0.996 | 0.999 | -1.17  | 0.671  | 0.954 |
| PF3D7_0726200 | -0.99   | 0.591 | 0.918 | 1.31   | 0.495  | 0.921 |
| PF3D7_0502200 | -7.19   | 0.171 | 0.918 | 8.79   | 0.112  | 0.919 |
| PF3D7_1324600 | 2.12    | 0.407 | 0.918 | -1.96  | 0.453  | 0.919 |
| PF3D7_0714400 | -0.535  | 0.817 | 0.953 | 3.16   | 0.228  | 0.919 |
| PF11_0293     | -1.77   | 0.627 | 0.919 | 1.22   | 0.674  | 0.954 |
| PF3D7_1028300 | -4.31   | 0.231 | 0.918 | 4.94   | 0.234  | 0.919 |
| PF3D7_1337200 | 1.13    | 0.434 | 0.918 | 1.35   | 0.67   | 0.954 |
| PF3D7_1476000 | 0.0868  | 0.932 | 0.987 | -0.769 | 0.588  | 0.934 |
| PF3D7_1010900 | -2.37   | 0.302 | 0.918 | 4.33   | 0.234  | 0.919 |
| PF3D7_1124700 | -2.99   | 0.256 | 0.918 | 3.93   | 0.188  | 0.919 |
| PF3D7_1119100 | -0.791  | 0.869 | 0.974 | 3.05   | 0.573  | 0.932 |
| PF3D7_1126800 | 4.47    | 0.427 | 0.918 | -4.83  | 0.376  | 0.919 |
| PF3D7_1105300 | 4.36    | 0.247 | 0.918 | -2.03  | 0.53   | 0.924 |
| PF3D7_1475700 | 2.46    | 0.535 | 0.918 | 2.89   | 0.385  | 0.919 |
| PF13_0350     | 3.89    | 0.343 | 0.918 | -1.21  | 0.736  | 0.957 |
| PF3D7_0703200 | -0.389  | 0.577 | 0.918 | 0.351  | 0.744  | 0.958 |
| PF11_0062     | 8.55    | 0.155 | 0.918 | -6.48  | 0.186  | 0.919 |
| PF3D7_1431900 | -0.645  | 0.716 | 0.935 | 4.44   | 0.226  | 0.919 |
| PF3D7_1007800 | -0.803  | 0.408 | 0.918 | 1.07   | 0.342  | 0.919 |
| PF3D7_0531100 | -0.74   | 0.343 | 0.918 | 8.7    | 0.0807 | 0.919 |
| PF3D7_1027700 | -3.53   | 0.39  | 0.918 | 3.8    | 0.497  | 0.922 |
| PF3D7_1201500 | -304    | 0.999 | 1     | 591    | 0.999  | 1     |

|               |         |        |       |        |        |       |
|---------------|---------|--------|-------|--------|--------|-------|
| PF3D7_0630800 | 2.4     | 0.555  | 0.918 | -1.63  | 0.724  | 0.957 |
| PF3D7_1349900 | -3.35   | 0.327  | 0.918 | 3.61   | 0.232  | 0.919 |
| PF3D7_0107800 | -0.0339 | 0.992  | 0.999 | 4.04   | 0.439  | 0.919 |
| PF3D7_0730900 | -2.12   | 0.431  | 0.918 | 4.09   | 0.161  | 0.919 |
| PF3D7_0320900 | -0.157  | 0.969  | 0.994 | -2.85  | 0.52   | 0.924 |
| PF3D7_0934200 | 2.43    | 0.408  | 0.918 | -2.99  | 0.326  | 0.919 |
| PF08_0054     | -1.79   | 0.634  | 0.919 | 1.57   | 0.734  | 0.957 |
| PF3D7_1134600 | 1.24    | 0.663  | 0.921 | -1.92  | 0.533  | 0.924 |
| PF3D7_1224900 | -9.6    | 0.134  | 0.918 | 6.13   | 0.283  | 0.919 |
| PF3D7_0916300 | -2.07   | 0.395  | 0.918 | 4.49   | 0.331  | 0.919 |
| PF3D7_1453600 | -1.19   | 0.734  | 0.937 | 4.22   | 0.41   | 0.919 |
| PF3D7_1242600 | -9.69   | 0.22   | 0.918 | 12.7   | 0.119  | 0.919 |
| PF3D7_0707800 | -2.8    | 0.512  | 0.918 | 4.69   | 0.29   | 0.919 |
| PF3D7_1300400 | 0.838   | 0.662  | 0.921 | -3.51  | 0.264  | 0.919 |
| PF3D7_1219600 | 3.81    | 0.205  | 0.918 | -3.16  | 0.259  | 0.919 |
| PF3D7_1229100 | -2.19   | 0.178  | 0.918 | 0.481  | 0.724  | 0.957 |
| PF3D7_1114700 | 1       | 0.705  | 0.932 | 0.277  | 0.926  | 0.989 |
| PF3D7_0613800 | 0.445   | 0.901  | 0.98  | -0.639 | 0.915  | 0.987 |
| PF3D7_0103500 | -1.28   | 0.803  | 0.953 | 2.85   | 0.581  | 0.933 |
| PF3D7_0906700 | 0.152   | 0.951  | 0.992 | 3.93   | 0.259  | 0.919 |
| PF3D7_0609000 | 0.147   | 0.722  | 0.937 | 0.0233 | 0.967  | 0.997 |
| PF3D7_0533100 | 6.09    | 0.167  | 0.918 | -1.73  | 0.687  | 0.954 |
| PF3D7_0937100 | -3.34   | 0.356  | 0.918 | 3.55   | 0.375  | 0.919 |
| PF3D7_0922100 | -0.256  | 0.857  | 0.969 | 0.644  | 0.7    | 0.954 |
| PF3D7_1326800 | 10.7    | 0.0568 | 0.918 | -7.04  | 0.124  | 0.919 |
| PF3D7_0619800 | -4.29   | 0.3    | 0.918 | 3.3    | 0.394  | 0.919 |
| PF3D7_0909100 | -0.36   | 0.62   | 0.919 | 0.909  | 0.422  | 0.919 |
| PF3D7_0323700 | -4.09   | 0.159  | 0.918 | 2.53   | 0.397  | 0.919 |
| PF3D7_1209400 | 0.0108  | 0.983  | 0.998 | 1.56   | 0.243  | 0.919 |
| PF3D7_0108000 | 5.01    | 0.204  | 0.918 | -2.7   | 0.473  | 0.919 |
| PF3D7_0312200 | -1.17   | 0.582  | 0.918 | 2      | 0.587  | 0.934 |
| PF3D7_0632500 | -0.956  | 0.43   | 0.918 | 3.32   | 0.171  | 0.919 |
| PF3D7_0507700 | -6.49   | 0.152  | 0.918 | 7.16   | 0.118  | 0.919 |
| PF3D7_0727700 | -1.38   | 0.461  | 0.918 | 1.64   | 0.439  | 0.919 |
| PF3D7_0708100 | 9.07    | 0.119  | 0.918 | -5.15  | 0.277  | 0.919 |
| PF3D7_1228600 | 4.58    | 0.364  | 0.918 | -1.56  | 0.714  | 0.957 |
| PF3D7_1331800 | -5.84   | 0.325  | 0.918 | 4.43   | 0.465  | 0.919 |
| PF3D7_1479100 | -1.84   | 0.405  | 0.918 | 4.04   | 0.285  | 0.919 |
| PF3D7_1356900 | -7.62   | 0.234  | 0.918 | 6.66   | 0.304  | 0.919 |
| PF3D7_1103500 | -0.703  | 0.652  | 0.92  | 0.849  | 0.639  | 0.95  |
| PF3D7_0936200 | -0.387  | 0.872  | 0.976 | -0.287 | 0.892  | 0.982 |
| PF3D7_1439500 | 1.52    | 0.602  | 0.918 | -1.83  | 0.566  | 0.931 |
| PF3D7_0615300 | 10.2    | 0.0447 | 0.918 | -9.57  | 0.0958 | 0.919 |
| PF3D7_1035700 | 1.38    | 0.3    | 0.918 | 2.06   | 0.381  | 0.919 |
| PF3D7_1467500 | 2.21    | 0.695  | 0.93  | -3.04  | 0.599  | 0.936 |
| PF3D7_1145000 | 0.418   | 0.662  | 0.921 | -1.71  | 0.257  | 0.919 |
| PF3D7_0207600 | -2.96   | 0.106  | 0.918 | 4.53   | 0.0811 | 0.919 |

|               |        |        |       |        |        |       |
|---------------|--------|--------|-------|--------|--------|-------|
| PF3D7_0929500 | 0.897  | 0.716  | 0.935 | -1.22  | 0.734  | 0.957 |
| PF3D7_1308300 | 2.26   | 0.484  | 0.918 | -0.985 | 0.76   | 0.962 |
| PF3D7_0807800 | -0.829 | 0.648  | 0.92  | 0.479  | 0.815  | 0.968 |
| PF3D7_1413800 | 0.88   | 0.761  | 0.941 | -0.93  | 0.79   | 0.965 |
| PF3D7_1008400 | -0.273 | 0.946  | 0.99  | 1.24   | 0.791  | 0.965 |
| PF3D7_1322700 | 0.104  | 0.799  | 0.953 | -0.6   | 0.665  | 0.952 |
| PF3D7_1010000 | 0.153  | 0.969  | 0.994 | -1.77  | 0.746  | 0.959 |
| PF3D7_1228400 | 0.196  | 0.927  | 0.986 | 2.07   | 0.412  | 0.919 |
| PF3D7_0825400 | -2.35  | 0.458  | 0.918 | 2.71   | 0.494  | 0.921 |
| PF3D7_0410000 | 1.39   | 0.751  | 0.94  | -4.96  | 0.253  | 0.919 |
| PF3D7_1369200 | -6     | 0.106  | 0.918 | 7.99   | 0.0656 | 0.919 |
| PF3D7_0408700 | -1     | 0.573  | 0.918 | 2.28   | 0.238  | 0.919 |
| PF3D7_1112800 | -6.64  | 0.284  | 0.918 | 6.47   | 0.305  | 0.919 |
| PF3D7_1108200 | 0.89   | 0.807  | 0.953 | -0.836 | 0.807  | 0.967 |
| PF3D7_0208800 | 8.69   | 0.18   | 0.918 | -2.97  | 0.515  | 0.924 |
| PF3D7_0420400 | 1.25   | 0.741  | 0.938 | -2.53  | 0.527  | 0.924 |
| PF3D7_0720300 | 0.857  | 0.625  | 0.919 | -0.527 | 0.906  | 0.984 |
| PF3D7_0714000 | -3.25  | 0.454  | 0.918 | 1.9    | 0.622  | 0.942 |
| PF3D7_0502300 | -22.6  | 0.0235 | 0.918 | 21.4   | 0.0319 | 0.919 |
| PF3D7_1361400 | 1.76   | 0.305  | 0.918 | 0.461  | 0.775  | 0.963 |
| PF3D7_0409500 | -1.63  | 0.711  | 0.933 | 5.78   | 0.18   | 0.919 |
| PF3D7_0405400 | 0.301  | 0.802  | 0.953 | 1.03   | 0.376  | 0.919 |
| PF3D7_1035000 | 1.18   | 0.695  | 0.93  | -0.47  | 0.855  | 0.978 |
| PF3D7_0717400 | -2.21  | 0.5    | 0.918 | 7.55   | 0.221  | 0.919 |
| PF3D7_0802600 | 0.0655 | 0.977  | 0.996 | 3.71   | 0.394  | 0.919 |
| PF3D7_1121700 | 2.96   | 0.247  | 0.918 | -2.97  | 0.258  | 0.919 |
| PF3D7_0512800 | 5.28   | 0.252  | 0.918 | -6.6   | 0.217  | 0.919 |
| PF3D7_0420700 | 0.58   | 0.463  | 0.918 | -1.01  | 0.523  | 0.924 |
| PF3D7_0208200 | 3      | 0.558  | 0.918 | -4.15  | 0.428  | 0.919 |
| PF3D7_1028000 | 0.996  | 0.54   | 0.918 | 1.14   | 0.646  | 0.95  |
| PF3D7_0400500 | -11.2  | 0.0888 | 0.918 | 10.2   | 0.0865 | 0.919 |
| PF3D7_1124900 | -0.36  | 0.918  | 0.984 | 2.25   | 0.724  | 0.957 |
| PF3D7_1372000 | 0.245  | 0.93   | 0.987 | 3.87   | 0.227  | 0.919 |
| PF3D7_0831800 | -0.713 | 0.829  | 0.959 | 0.457  | 0.886  | 0.982 |
| PF3D7_0711500 | -3.14  | 0.281  | 0.918 | 3.92   | 0.416  | 0.919 |
| PF3D7_1338300 | 1.54   | 0.547  | 0.918 | -1.61  | 0.526  | 0.924 |
| PF3D7_1428200 | -0.973 | 0.768  | 0.942 | -1.24  | 0.774  | 0.963 |
| PF3D7_0718000 | 0.185  | 0.928  | 0.986 | 1.08   | 0.494  | 0.921 |
| PF3D7_1212200 | 1.48   | 0.584  | 0.918 | -1.36  | 0.609  | 0.94  |
| PF3D7_0710100 | -1.35  | 0.815  | 0.953 | 1.74   | 0.664  | 0.952 |
| PF3D7_1316100 | -1.74  | 0.572  | 0.918 | 1.11   | 0.734  | 0.957 |
| PF3D7_1320700 | -3.97  | 0.188  | 0.918 | 5.87   | 0.0809 | 0.919 |
| PF3D7_0316300 | -4.69  | 0.121  | 0.918 | 4.88   | 0.0946 | 0.919 |
| PF3D7_1124600 | -2.86  | 0.447  | 0.918 | 16.3   | 0.063  | 0.919 |
| PF3D7_1405500 | -1.86  | 0.45   | 0.918 | 2.51   | 0.349  | 0.919 |
| PF3D7_1346500 | -2.07  | 0.376  | 0.918 | -0.282 | 0.873  | 0.981 |
| PF3D7_0718900 | 2.61   | 0.506  | 0.918 | 0.367  | 0.904  | 0.984 |



|               |         |        |       |        |        |       |
|---------------|---------|--------|-------|--------|--------|-------|
| PF3D7_1215900 | -1.38   | 0.204  | 0.918 | 0.713  | 0.454  | 0.919 |
| PF3D7_0519700 | -2.79   | 0.484  | 0.918 | 0.622  | 0.889  | 0.982 |
| PF3D7_0926200 | -0.863  | 0.485  | 0.918 | 2.43   | 0.162  | 0.919 |
| PF3D7_1462500 | 1.32    | 0.297  | 0.918 | -0.27  | 0.926  | 0.989 |
| PF3D7_1404900 | 0.355   | 0.947  | 0.99  | -0.975 | 0.855  | 0.978 |
| PF3D7_0304800 | -1.5    | 0.657  | 0.921 | 2.06   | 0.553  | 0.924 |
| PF3D7_1003300 | 5.28    | 0.271  | 0.918 | -1.7   | 0.468  | 0.919 |
| PF3D7_1342900 | -0.0167 | 0.96   | 0.992 | 0.331  | 0.644  | 0.95  |
| PF3D7_0829600 | -3.09   | 0.281  | 0.918 | 2.62   | 0.331  | 0.919 |
| PF3D7_0705300 | 2.95    | 0.538  | 0.918 | -3.7   | 0.405  | 0.919 |
| PF3D7_1222300 | 4.09    | 0.314  | 0.918 | -7.25  | 0.151  | 0.919 |
| PF3D7_0318500 | 0.374   | 0.734  | 0.937 | -0.243 | 0.764  | 0.962 |
| PF3D7_1125900 | -1.67   | 0.525  | 0.918 | -0.67  | 0.87   | 0.981 |
| PF3D7_0214700 | -2.13   | 0.48   | 0.918 | 3.8    | 0.537  | 0.924 |
| PF3D7_1249000 | -6.73   | 0.196  | 0.918 | -3.86  | 0.437  | 0.919 |
| PF3D7_1246300 | 0.436   | 0.629  | 0.919 | -0.666 | 0.616  | 0.942 |
| PF3D7_0802700 | -6.8    | 0.271  | 0.918 | 5.48   | 0.326  | 0.919 |
| PF3D7_0404300 | -18.4   | 0.115  | 0.918 | -1.03  | 0.872  | 0.981 |
| PF3D7_0524900 | -11.1   | 0.0377 | 0.918 | 6.82   | 0.145  | 0.919 |
| PF3D7_1018400 | 1.33    | 0.757  | 0.941 | -3.39  | 0.46   | 0.919 |
| PF3D7_0932700 | -0.615  | 0.719  | 0.937 | 1.22   | 0.57   | 0.931 |
| PF3D7_0220800 | -6.06   | 0.134  | 0.918 | 6.52   | 0.0852 | 0.919 |
| PF3D7_0523200 | 4.87    | 0.155  | 0.918 | -4.48  | 0.21   | 0.919 |
| PF3D7_1330600 | -2.62   | 0.603  | 0.918 | 2.12   | 0.652  | 0.95  |
| PF3D7_1355200 | -0.425  | 0.812  | 0.953 | 0.225  | 0.944  | 0.994 |
| PF3D7_0931800 | 1.9     | 0.38   | 0.918 | -2.19  | 0.397  | 0.919 |
| PF3D7_0623900 | -3      | 0.414  | 0.918 | 3.39   | 0.313  | 0.919 |
| PF3D7_1305000 | -3.04   | 0.351  | 0.918 | 3.38   | 0.354  | 0.919 |
| PF3D7_0416300 | -1.88   | 0.398  | 0.918 | 2.59   | 0.317  | 0.919 |
| PF3D7_0308100 | 1.25    | 0.621  | 0.919 | -2.2   | 0.428  | 0.919 |
| PF3D7_0515000 | 5.7     | 0.251  | 0.918 | -3.5   | 0.423  | 0.919 |
| PF3D7_0512500 | 3.63    | 0.312  | 0.918 | -4.11  | 0.261  | 0.919 |
| PF3D7_1408900 | 3.08    | 0.266  | 0.918 | -1.96  | 0.44   | 0.919 |
| PF3D7_0935500 | 2.69    | 0.469  | 0.918 | -2.16  | 0.596  | 0.936 |
| PF3D7_1204600 | 1150    | 0.998  | 1     | -1140  | 0.998  | 1     |
| PF3D7_1433900 | 6.66    | 0.228  | 0.918 | -7.16  | 0.207  | 0.919 |
| PF3D7_0212500 | 1.86    | 0.265  | 0.918 | -2.65  | 0.272  | 0.919 |
| PF3D7_1353200 | -1.46   | 0.595  | 0.918 | 0.651  | 0.85   | 0.976 |
| PF3D7_1208200 | -2.08   | 0.671  | 0.923 | 2.55   | 0.54   | 0.924 |
| PF3D7_1426900 | -2.31   | 0.591  | 0.918 | 0.856  | 0.85   | 0.976 |
| PF3D7_1205800 | -18.7   | 0.063  | 0.918 | 22.9   | 0.061  | 0.919 |
| PF3D7_1141100 | 2.39    | 0.419  | 0.918 | -3.45  | 0.221  | 0.919 |
| PF3D7_1021200 | -1.62   | 0.398  | 0.918 | 2.51   | 0.169  | 0.919 |
| PF3D7_0708700 | -8.17   | 0.14   | 0.918 | 5.13   | 0.126  | 0.919 |
| PF3D7_1452100 | 2.57    | 0.398  | 0.918 | -3.63  | 0.301  | 0.919 |
| PF3D7_1316200 | 1.11    | 0.452  | 0.918 | 1.35   | 0.671  | 0.954 |
| PF3D7_0812700 | -3.02   | 0.194  | 0.918 | 4.86   | 0.0462 | 0.919 |

|               |         |        |       |         |        |       |
|---------------|---------|--------|-------|---------|--------|-------|
| PF3D7_1300600 | 2.54    | 0.418  | 0.918 | -2.92   | 0.377  | 0.919 |
| PF3D7_1419300 | 1.29    | 0.732  | 0.937 | -1.08   | 0.854  | 0.978 |
| PF3D7_0934500 | -2.34   | 0.632  | 0.919 | 4.67    | 0.266  | 0.919 |
| PF3D7_1207500 | -1.72   | 0.571  | 0.918 | -0.941  | 0.669  | 0.954 |
| PF3D7_0907800 | 0.605   | 0.84   | 0.962 | 0.683   | 0.833  | 0.972 |
| PF3D7_1475500 | -0.975  | 0.745  | 0.94  | 2.23    | 0.437  | 0.919 |
| PFC10_API0030 | -2.82   | 0.366  | 0.918 | -2.71   | 0.446  | 0.919 |
| PF3D7_0313400 | -3.96   | 0.295  | 0.918 | 3.96    | 0.281  | 0.919 |
| PF3D7_1218900 | 0.267   | 0.9    | 0.98  | -0.901  | 0.608  | 0.94  |
| PF3D7_0106300 | -0.508  | 0.872  | 0.976 | 0.178   | 0.956  | 0.994 |
| PFC10_API0028 | 6.02    | 0.174  | 0.918 | -8.66   | 0.114  | 0.919 |
| PF3D7_0206200 | -0.0592 | 0.883  | 0.979 | 0.452   | 0.724  | 0.957 |
| PF3D7_1135300 | -3.17   | 0.303  | 0.918 | 6.06    | 0.124  | 0.919 |
| PF3D7_0317000 | -1.86   | 0.585  | 0.918 | 3.39    | 0.407  | 0.919 |
| PF3D7_1405600 | -8.58   | 0.1    | 0.918 | 6.78    | 0.0753 | 0.919 |
| PF3D7_1217400 | -1.08   | 0.753  | 0.94  | -0.802  | 0.814  | 0.968 |
| PF3D7_1347700 | -2.31   | 0.166  | 0.918 | 2.56    | 0.149  | 0.919 |
| PF3D7_0712000 | -0.151  | 0.911  | 0.983 | 0.199   | 0.898  | 0.983 |
| PF3D7_1432500 | -0.249  | 0.659  | 0.921 | -0.0569 | 0.927  | 0.989 |
| PF3D7_0423200 | -14.4   | 0.0883 | 0.918 | -5.39   | 0.37   | 0.919 |
| PF3D7_0932200 | 0.234   | 0.927  | 0.986 | -0.315  | 0.909  | 0.984 |
| PF3D7_0320100 | -9.02   | 0.224  | 0.918 | 5.94    | 0.345  | 0.919 |
| PF3D7_0600200 | 2.58    | 0.357  | 0.918 | 0.89    | 0.694  | 0.954 |
| PF3D7_1229900 | -4.52   | 0.306  | 0.918 | 6.95    | 0.129  | 0.919 |
| PF3D7_0502100 | -2.86   | 0.492  | 0.918 | 4.92    | 0.282  | 0.919 |
| PF3D7_0625200 | 2.93    | 0.476  | 0.918 | -3.55   | 0.398  | 0.919 |
| PF3D7_0907400 | 2.29    | 0.65   | 0.92  | -1.39   | 0.718  | 0.957 |
| PF3D7_0612900 | 3.71    | 0.34   | 0.918 | -5.79   | 0.245  | 0.919 |
| PF3D7_1218400 | -6.34   | 0.128  | 0.918 | 9.54    | 0.0678 | 0.919 |
| PF3D7_1149100 | 0.103   | 0.947  | 0.99  | 0.554   | 0.737  | 0.957 |
| PF3D7_1428500 | -3.51   | 0.233  | 0.918 | 6.32    | 0.194  | 0.919 |
| PF3D7_1470600 | -10.9   | 0.0432 | 0.918 | 9.65    | 0.0489 | 0.919 |
| PF3D7_0207100 | 0.0876  | 0.981  | 0.997 | 0.145   | 0.97   | 0.998 |
| PF3D7_0400700 | -0.732  | 0.862  | 0.971 | 0.828   | 0.844  | 0.975 |
| PF3D7_1466000 | 3.08    | 0.681  | 0.923 | -2.01   | 0.739  | 0.958 |
| PF3D7_1004600 | 4.68    | 0.313  | 0.918 | -3.35   | 0.461  | 0.919 |
| PF3D7_1006900 | -0.0623 | 0.985  | 0.999 | -1.88   | 0.481  | 0.92  |
| PF3D7_1319500 | 0.97    | 0.633  | 0.919 | 1.91    | 0.688  | 0.954 |
| PF3D7_0322600 | -11.5   | 0.0569 | 0.918 | 15.1    | 0.0875 | 0.919 |
| PF3D7_0222000 | 1.04    | 0.75   | 0.94  | -0.18   | 0.923  | 0.989 |
| PF3D7_1029200 | -3.22   | 0.348  | 0.918 | 1.91    | 0.645  | 0.95  |
| PF3D7_1450400 | -0.312  | 0.714  | 0.934 | 0.383   | 0.658  | 0.95  |
| PFE0360c      | -0.046  | 0.942  | 0.989 | 1.43    | 0.381  | 0.919 |
| PF3D7_1305200 | 0.696   | 0.848  | 0.965 | -0.961  | 0.776  | 0.963 |
| PF3D7_0214900 | -4.74   | 0.242  | 0.918 | 6.06    | 0.185  | 0.919 |
| PF3D7_0217400 | -4.59   | 0.341  | 0.918 | 2.34    | 0.511  | 0.924 |
| PF3D7_0905400 | -0.815  | 0.773  | 0.943 | 2.95    | 0.358  | 0.919 |

|               |         |        |       |         |        |       |
|---------------|---------|--------|-------|---------|--------|-------|
| PF3D7_1459400 | -2.47   | 0.406  | 0.918 | 0.72    | 0.795  | 0.965 |
| PF3D7_1252100 | -2.4    | 0.513  | 0.918 | 4.49    | 0.225  | 0.919 |
| MAL8P1.140    | 5.08    | 0.218  | 0.918 | -2.62   | 0.364  | 0.919 |
| PF3D7_1409300 | 0.656   | 0.338  | 0.918 | -0.783  | 0.538  | 0.924 |
| PF3D7_0500500 | -0.0127 | 0.991  | 0.999 | 0.274   | 0.796  | 0.965 |
| PF3D7_0919900 | -0.269  | 0.727  | 0.937 | 0.38    | 0.719  | 0.957 |
| PF3D7_0521800 | -2.64   | 0.51   | 0.918 | 3.04    | 0.495  | 0.921 |
| PF3D7_1019300 | -0.296  | 0.633  | 0.919 | -0.112  | 0.916  | 0.987 |
| PFE0265c      | 12.4    | 0.105  | 0.918 | -8.08   | 0.148  | 0.919 |
| PF3D7_1373300 | -0.381  | 0.89   | 0.979 | 0.232   | 0.931  | 0.992 |
| PF3D7_1201700 | -4.57   | 0.254  | 0.918 | 4.43    | 0.183  | 0.919 |
| PF3D7_0405100 | -12.3   | 0.15   | 0.918 | 7.4     | 0.119  | 0.919 |
| PF3D7_1321800 | -2.81   | 0.247  | 0.918 | 3.88    | 0.103  | 0.919 |
| PF3D7_0602700 | 0.486   | 0.705  | 0.932 | -0.162  | 0.892  | 0.982 |
| PF3D7_1479600 | -8.04   | 0.24   | 0.918 | 9.52    | 0.189  | 0.919 |
| PF3D7_0106600 | 2.38    | 0.509  | 0.918 | 0.109   | 0.973  | 0.998 |
| PF3D7_0529300 | 0.591   | 0.67   | 0.923 | 0.00651 | 0.995  | 0.999 |
| PF3D7_0724600 | 1.45    | 0.676  | 0.923 | -3.35   | 0.337  | 0.919 |
| PF3D7_1243500 | -10.9   | 0.11   | 0.918 | 9.77    | 0.141  | 0.919 |
| PF3D7_0715400 | 5.32    | 0.206  | 0.918 | -2.15   | 0.513  | 0.924 |
| PF3D7_0200800 | 4.03    | 0.373  | 0.918 | -2.5    | 0.581  | 0.933 |
| PF3D7_0311900 | -10.7   | 0.0786 | 0.918 | 16      | 0.0717 | 0.919 |
| PF3D7_0936000 | -5.24   | 0.393  | 0.918 | 5.25    | 0.324  | 0.919 |
| PF3D7_1142500 | -4.66   | 0.154  | 0.918 | 0.809   | 0.828  | 0.97  |
| PF3D7_0318900 | 34.1    | 0.0935 | 0.918 | -27.8   | 0.0876 | 0.919 |
| PF3D7_1018300 | 1.03    | 0.56   | 0.918 | 0.196   | 0.871  | 0.981 |
| PF3D7_0812200 | 1.55    | 0.607  | 0.918 | 0.55    | 0.897  | 0.982 |
| PF3D7_0112800 | 0.979   | 0.412  | 0.918 | -0.0094 | 0.996  | 0.999 |
| PF3D7_0627400 | -0.901  | 0.347  | 0.918 | 1.85    | 0.203  | 0.919 |
| PF3D7_1318400 | 0.464   | 0.713  | 0.934 | 0.767   | 0.648  | 0.95  |
| PF3D7_1235200 | -0.623  | 0.451  | 0.918 | 0.61    | 0.515  | 0.924 |
| PF3D7_0211500 | -0.0772 | 0.934  | 0.987 | -1.74   | 0.431  | 0.919 |
| PF3D7_1368700 | 7.7     | 0.201  | 0.918 | -5.42   | 0.39   | 0.919 |
| PF3D7_1478600 | -0.045  | 0.99   | 0.999 | 0.293   | 0.94   | 0.994 |
| PF3D7_0209000 | 0.315   | 0.683  | 0.925 | 3.22    | 0.466  | 0.919 |
| PF3D7_1033300 | 2.41    | 0.637  | 0.919 | -4.88   | 0.526  | 0.924 |
| PF3D7_1401100 | -1.79   | 0.431  | 0.918 | 1.1     | 0.64   | 0.95  |
| PF3D7_1239600 | 4.41    | 0.24   | 0.918 | 0.631   | 0.869  | 0.981 |
| PF3D7_0625100 | -0.182  | 0.887  | 0.979 | 1.15    | 0.435  | 0.919 |
| PF3D7_0708000 | 4.66    | 0.298  | 0.918 | -2.86   | 0.49   | 0.921 |
| PF3D7_0621200 | -16     | 0.0918 | 0.918 | 14.9    | 0.0933 | 0.919 |
| PF3D7_0904700 | -4.18   | 0.328  | 0.918 | -2.75   | 0.558  | 0.927 |
| PF3D7_1325900 | -0.491  | 0.482  | 0.918 | -0.191  | 0.876  | 0.981 |
| PF3D7_0528800 | -2.03   | 0.533  | 0.918 | 2.9     | 0.515  | 0.924 |
| PF3D7_1018700 | 0.148   | 0.975  | 0.996 | -0.087  | 0.985  | 0.998 |
| PF3D7_0324100 | -1.66   | 0.48   | 0.918 | 2.19    | 0.387  | 0.919 |
| PF3D7_0404900 | -2.63   | 0.462  | 0.918 | 8.53    | 0.129  | 0.919 |

|               |          |        |       |        |        |       |
|---------------|----------|--------|-------|--------|--------|-------|
| PF3D7_0310800 | -8.33    | 0.304  | 0.918 | 5.17   | 0.311  | 0.919 |
| PF3D7_1247600 | -5.46    | 0.18   | 0.918 | 9.63   | 0.17   | 0.919 |
| PF3D7_0816400 | 1.33     | 0.496  | 0.918 | -2.6   | 0.246  | 0.919 |
| PF3D7_1023900 | 1.54     | 0.652  | 0.92  | 0.0951 | 0.975  | 0.998 |
| PF3D7_0928300 | 1.23     | 0.614  | 0.919 | 1.71   | 0.73   | 0.957 |
| PF3D7_0822700 | -2.35    | 0.593  | 0.918 | -1.32  | 0.813  | 0.968 |
| PF3D7_1451400 | -0.43    | 0.646  | 0.919 | 0.894  | 0.34   | 0.919 |
| PF3D7_0907300 | -2.08    | 0.411  | 0.918 | 2.51   | 0.291  | 0.919 |
| PF3D7_1251700 | -5.92    | 0.0515 | 0.918 | 8.98   | 0.0432 | 0.919 |
| PF3D7_0713200 | 0.457    | 0.854  | 0.967 | -0.14  | 0.957  | 0.994 |
| PF3D7_1031900 | -4.09    | 0.491  | 0.918 | 6.23   | 0.304  | 0.919 |
| PF3D7_1034700 | 3.29     | 0.323  | 0.918 | -0.85  | 0.69   | 0.954 |
| PF3D7_1111500 | 0.152    | 0.937  | 0.988 | -1.19  | 0.623  | 0.942 |
| PF3D7_0613500 | 4.64     | 0.192  | 0.918 | -5.72  | 0.149  | 0.919 |
| PF3D7_0717000 | 3.95     | 0.471  | 0.918 | -1.54  | 0.73   | 0.957 |
| PF3D7_1236100 | -0.00784 | 0.986  | 0.999 | 0.135  | 0.847  | 0.975 |
| PF3D7_1244400 | -0.493   | 0.545  | 0.918 | 0.0777 | 0.929  | 0.991 |
| PF3D7_0809400 | -1.86    | 0.467  | 0.918 | 3.51   | 0.33   | 0.919 |
| PF3D7_1026900 | -6.35    | 0.159  | 0.918 | 10.1   | 0.0573 | 0.919 |
| PF3D7_0924000 | -1.05    | 0.646  | 0.919 | 0.598  | 0.8    | 0.965 |
| PF3D7_1125300 | -0.308   | 0.711  | 0.933 | 0.931  | 0.265  | 0.919 |
| PF3D7_0200100 | 0.272    | 0.576  | 0.918 | -0.556 | 0.518  | 0.924 |
| PF3D7_0411100 | -4.28    | 0.266  | 0.918 | 1.74   | 0.411  | 0.919 |
| PF3D7_1414400 | -12.3    | 0.153  | 0.918 | 12     | 0.063  | 0.919 |
| PF3D7_0112900 | -17.2    | 0.0864 | 0.918 | 6.12   | 0.208  | 0.919 |
| PF3D7_0612700 | -8.34    | 0.163  | 0.918 | 8.86   | 0.17   | 0.919 |
| PF3D7_1332000 | 0.722    | 0.624  | 0.919 | -1.34  | 0.509  | 0.924 |
| PF3D7_1012700 | 0.204    | 0.76   | 0.941 | 0.543  | 0.439  | 0.919 |
| PF3D7_1230300 | 4.7      | 0.387  | 0.918 | -4.29  | 0.485  | 0.92  |
| PF3D7_1207900 | -9.29    | 0.161  | 0.918 | 8.86   | 0.139  | 0.919 |
| PF3D7_1424400 | 0.33     | 0.879  | 0.978 | -0.487 | 0.837  | 0.973 |
| PF3D7_0918300 | -1.94    | 0.41   | 0.918 | 2.41   | 0.298  | 0.919 |
| PF3D7_0105100 | -10.2    | 0.156  | 0.918 | 9.03   | 0.165  | 0.919 |
| PF3D7_0629500 | 3.48     | 0.451  | 0.918 | -13.4  | 0.0684 | 0.919 |
| PF3D7_0932500 | 2.68     | 0.566  | 0.918 | 0.849  | 0.844  | 0.975 |
| PFD0425w      | 0.955    | 0.65   | 0.92  | -1.39  | 0.49   | 0.921 |
| PF3D7_0828300 | -1.22    | 0.475  | 0.918 | 0.387  | 0.801  | 0.965 |
| PF3D7_0516800 | 0.598    | 0.532  | 0.918 | -0.225 | 0.844  | 0.975 |
| PF3D7_1315400 | 2.28     | 0.484  | 0.918 | -0.682 | 0.802  | 0.965 |
| PF3D7_1240000 | -0.848   | 0.384  | 0.918 | 1.15   | 0.315  | 0.919 |
| PF3D7_1021800 | 0.2      | 0.909  | 0.982 | 0.167  | 0.95   | 0.994 |
| PF3D7_0421800 | -3.01    | 0.714  | 0.934 | 4.22   | 0.633  | 0.948 |
| PF3D7_1040000 | -4.36    | 0.402  | 0.918 | 4.57   | 0.379  | 0.919 |
| PF3D7_1440000 | -2.31    | 0.208  | 0.918 | 2.52   | 0.233  | 0.919 |
| PF3D7_0530300 | -0.511   | 0.915  | 0.984 | 0.207  | 0.973  | 0.998 |
| PF3D7_1416500 | -2.29    | 0.417  | 0.918 | 4.76   | 0.167  | 0.919 |
| PF3D7_0401300 | -2.46    | 0.374  | 0.918 | 2.93   | 0.342  | 0.919 |

|               |         |        |       |         |       |       |
|---------------|---------|--------|-------|---------|-------|-------|
| PF3D7_1407200 | -2.2    | 0.331  | 0.918 | 3.84    | 0.171 | 0.919 |
| PF3D7_1024800 | -3.35   | 0.355  | 0.918 | 6.29    | 0.174 | 0.919 |
| PF3D7_1200500 | -1.48   | 0.465  | 0.918 | 1.23    | 0.567 | 0.931 |
| PF3D7_1310600 | 2.3     | 0.685  | 0.926 | -1.85   | 0.707 | 0.954 |
| PF3D7_0212900 | 6.98    | 0.0824 | 0.918 | 2.94    | 0.469 | 0.919 |
| PF3D7_0418500 | 0.994   | 0.575  | 0.918 | 3.53    | 0.469 | 0.919 |
| PF3D7_1444100 | 0.346   | 0.707  | 0.933 | 0.436   | 0.64  | 0.95  |
| PF3D7_0202100 | 3.18    | 0.255  | 0.918 | -1.7    | 0.569 | 0.931 |
| PF3D7_1326100 | -1.27   | 0.783  | 0.946 | -1.08   | 0.834 | 0.972 |
| PF3D7_1420400 | 0.472   | 0.802  | 0.953 | -1.3    | 0.542 | 0.924 |
| PF3D7_0908500 | -1200   | 0.991  | 0.999 | 2430    | 0.991 | 0.998 |
| PF3D7_1002800 | -4.68   | 0.236  | 0.918 | -4      | 0.409 | 0.919 |
| PF3D7_0718100 | 2.96    | 0.519  | 0.918 | -3.36   | 0.477 | 0.919 |
| PF3D7_1400700 | 0.249   | 0.731  | 0.937 | 1.06    | 0.386 | 0.919 |
| PF3D7_1311500 | -1.02   | 0.748  | 0.94  | 3.61    | 0.298 | 0.919 |
| PF3D7_1123800 | 2.27    | 0.326  | 0.918 | -0.462  | 0.84  | 0.975 |
| PF3D7_0204300 | 1.25    | 0.726  | 0.937 | 0.35    | 0.908 | 0.984 |
| PF3D7_1100200 | -0.577  | 0.827  | 0.959 | -0.0585 | 0.984 | 0.998 |
| PF3D7_1131700 | -0.186  | 0.959  | 0.992 | -1.68   | 0.473 | 0.919 |
| PF3D7_1368600 | 3.39    | 0.277  | 0.918 | -4.16   | 0.205 | 0.919 |
| PF3D7_1428900 | 0.481   | 0.502  | 0.918 | 1.08    | 0.441 | 0.919 |
| PF3D7_1038500 | -3.01   | 0.41   | 0.918 | 2.47    | 0.424 | 0.919 |
| PF3D7_1239900 | -1.06   | 0.449  | 0.918 | 1.4     | 0.317 | 0.919 |
| PF3D7_0804600 | -1.01   | 0.483  | 0.918 | 2.27    | 0.356 | 0.919 |
| PF3D7_1020500 | -2.29   | 0.501  | 0.918 | 1.72    | 0.597 | 0.936 |
| PF3D7_1212400 | -0.0422 | 0.99   | 0.999 | 1.98    | 0.532 | 0.924 |
| PF3D7_0310700 | 11.9    | 0.109  | 0.918 | -2.64   | 0.409 | 0.919 |
| PF3D7_1408000 | 0.45    | 0.851  | 0.966 | 2.08    | 0.492 | 0.921 |
| PF3D7_1316800 | 1.23    | 0.638  | 0.919 | 0.586   | 0.843 | 0.975 |
| PF3D7_0106200 | -2.71   | 0.581  | 0.918 | 6.02    | 0.433 | 0.919 |
| PF3D7_1235400 | 0.0227  | 0.995  | 0.999 | -1.96   | 0.724 | 0.957 |
| PF3D7_1229300 | 2.38    | 0.428  | 0.918 | 1.42    | 0.676 | 0.954 |
| PF3D7_0523800 | -0.22   | 0.885  | 0.979 | -0.122  | 0.932 | 0.992 |
| PF3D7_0830500 | 3.45    | 0.469  | 0.918 | -12.3   | 0.118 | 0.919 |
| PF3D7_0201400 | 1.06    | 0.693  | 0.928 | 1.41    | 0.651 | 0.95  |
| PF3D7_1368200 | 5.1     | 0.189  | 0.918 | -6.39   | 0.173 | 0.919 |
| PF3D7_1336900 | 3.43    | 0.397  | 0.918 | -1.79   | 0.644 | 0.95  |
| PF3D7_1320300 | -2.46   | 0.502  | 0.918 | 2.68    | 0.507 | 0.924 |
| PF3D7_1201900 | -5.49   | 0.275  | 0.918 | 6.62    | 0.273 | 0.919 |
| PF3D7_0728600 | -0.896  | 0.385  | 0.918 | 0.704   | 0.571 | 0.931 |
| PF3D7_0301100 | -1.34   | 0.686  | 0.926 | 2.93    | 0.378 | 0.919 |
| PF3D7_0310000 | 1.64    | 0.469  | 0.918 | -0.0696 | 0.97  | 0.998 |
| PF3D7_0425700 | 1.04    | 0.56   | 0.918 | -0.777  | 0.724 | 0.957 |
| PF3D7_0203300 | -2.92   | 0.163  | 0.918 | 2.96    | 0.143 | 0.919 |
| PF3D7_0618100 | 7.39    | 0.12   | 0.918 | -1.91   | 0.681 | 0.954 |
| PF3D7_0215700 | 0.381   | 0.668  | 0.923 | 1.29    | 0.395 | 0.919 |
| PF3D7_1243200 | -2.04   | 0.666  | 0.923 | 2.35    | 0.617 | 0.942 |

|               |           |        |       |         |       |       |
|---------------|-----------|--------|-------|---------|-------|-------|
| PF3D7_0716200 | 3.69      | 0.219  | 0.918 | -2.89   | 0.259 | 0.919 |
| PF3D7_0927300 | 2.92      | 0.475  | 0.918 | -3.98   | 0.447 | 0.919 |
| PF3D7_1006000 | 2.26      | 0.537  | 0.918 | -3.31   | 0.404 | 0.919 |
| PF3D7_1460100 | -2.92     | 0.567  | 0.918 | -3.06   | 0.401 | 0.919 |
| PF3D7_1472600 | 5.98      | 0.312  | 0.918 | -4.47   | 0.474 | 0.919 |
| PF3D7_1039000 | -4.92     | 0.291  | 0.918 | 3.87    | 0.34  | 0.919 |
| PF3D7_1336800 | -1.17     | 0.375  | 0.918 | 0.00284 | 0.999 | 1     |
| PF3D7_1139200 | -2.78     | 0.256  | 0.918 | 5.97    | 0.185 | 0.919 |
| PF3D7_0910500 | -0.822    | 0.762  | 0.941 | 0.826   | 0.821 | 0.968 |
| PF3D7_1432600 | -1.25     | 0.233  | 0.918 | 2.75    | 0.1   | 0.919 |
| PF3D7_0619700 | 0.476     | 0.785  | 0.947 | 3.09    | 0.243 | 0.919 |
| PF3D7_1149600 | -7.22     | 0.0882 | 0.918 | 6.2     | 0.215 | 0.919 |
| MAL13P1.303   | -2.8      | 0.499  | 0.918 | 6.16    | 0.264 | 0.919 |
| PF3D7_1456500 | 2.08      | 0.636  | 0.919 | -3.27   | 0.484 | 0.92  |
| PF3D7_1220100 | -2.5      | 0.377  | 0.918 | 2.63    | 0.422 | 0.919 |
| PF3D7_1460900 | 17.6      | 0.123  | 0.918 | 4.26    | 0.57  | 0.931 |
| PF3D7_1421300 | -6.95     | 0.202  | 0.918 | 6.82    | 0.293 | 0.919 |
| PF3D7_1425300 | 0.954     | 0.724  | 0.937 | 1.53    | 0.682 | 0.954 |
| PF3D7_1216900 | 1.41      | 0.533  | 0.918 | -1.06   | 0.671 | 0.954 |
| PF3D7_1476900 | -3.54     | 0.274  | 0.918 | 2.17    | 0.531 | 0.924 |
| PF3D7_1461400 | -3.36     | 0.23   | 0.918 | 4.61    | 0.201 | 0.919 |
| PF3D7_0727800 | 9.97      | 0.141  | 0.918 | -4.62   | 0.235 | 0.919 |
| PF3D7_1201200 | 0.531     | 0.311  | 0.918 | 0.465   | 0.618 | 0.942 |
| PF3D7_0526400 | -0.000269 | 1      | 1     | 1.06    | 0.769 | 0.963 |
| PF3D7_0202500 | 0.53      | 0.787  | 0.948 | -0.968  | 0.552 | 0.924 |
| PF3D7_1247300 | -4.77     | 0.24   | 0.918 | 5.28    | 0.122 | 0.919 |
| PFC10_API0037 | -11       | 0.215  | 0.918 | 4.55    | 0.572 | 0.932 |
| PF3D7_1318300 | 0.0619    | 0.968  | 0.993 | 0.924   | 0.539 | 0.924 |
| PF3D7_0807200 | 0.816     | 0.765  | 0.941 | 0.811   | 0.797 | 0.965 |
| PF14_0191     | -5.93     | 0.097  | 0.918 | 4.37    | 0.228 | 0.919 |
| PF3D7_1480000 | -0.868    | 0.549  | 0.918 | 1.18    | 0.47  | 0.919 |
| PF3D7_0622500 | 11.1      | 0.126  | 0.918 | -11.1   | 0.115 | 0.919 |
| PF3D7_1036000 | -0.632    | 0.717  | 0.935 | 2.62    | 0.221 | 0.919 |
| PF3D7_1247400 | -0.833    | 0.722  | 0.937 | 0.0631  | 0.977 | 0.998 |
| PF3D7_0219900 | -2.07     | 0.437  | 0.918 | 5.35    | 0.178 | 0.919 |
| PF3D7_1024000 | -3.52     | 0.273  | 0.918 | 2.7     | 0.391 | 0.919 |
| PF3D7_0406800 | 0.0157    | 0.992  | 0.999 | -1.08   | 0.786 | 0.963 |
| PF3D7_1460600 | -1.72     | 0.679  | 0.923 | 1.51    | 0.644 | 0.95  |
| PF3D7_1460000 | -2.17     | 0.35   | 0.918 | 2.28    | 0.323 | 0.919 |
| PF3D7_0214600 | 4.51      | 0.284  | 0.918 | -6.92   | 0.191 | 0.919 |
| PF3D7_1037800 | -2.72     | 0.326  | 0.918 | 3.75    | 0.207 | 0.919 |
| PF3D7_1446700 | 1.73      | 0.567  | 0.918 | -0.874  | 0.82  | 0.968 |
| PF3D7_1134100 | -1.42     | 0.625  | 0.919 | 4.14    | 0.154 | 0.919 |
| PF3D7_0608310 | -2.23     | 0.335  | 0.918 | 3.61    | 0.178 | 0.919 |
| PF3D7_0316100 | -0.98     | 0.811  | 0.953 | 0.559   | 0.883 | 0.981 |
| PF3D7_1103000 | -14.1     | 0.159  | 0.918 | 13.3    | 0.136 | 0.919 |
| PF3D7_0218600 | 1.66      | 0.737  | 0.938 | -2.15   | 0.684 | 0.954 |

|               |         |        |       |        |        |       |
|---------------|---------|--------|-------|--------|--------|-------|
| PF3D7_1015200 | 8.06    | 0.207  | 0.918 | -7.58  | 0.219  | 0.919 |
| PF3D7_1417900 | -3.12   | 0.578  | 0.918 | -2.06  | 0.744  | 0.958 |
| PFE0520c      | -7.01   | 0.192  | 0.918 | 2.35   | 0.616  | 0.942 |
| PF3D7_1472800 | -21.6   | 0.0567 | 0.918 | 14     | 0.0528 | 0.919 |
| PF3D7_0732200 | -0.965  | 0.455  | 0.918 | 2.19   | 0.135  | 0.919 |
| PF3D7_1213200 | 1.75    | 0.523  | 0.918 | -1.01  | 0.71   | 0.955 |
| PF3D7_0910100 | -0.657  | 0.859  | 0.97  | 0.768  | 0.782  | 0.963 |
| PF3D7_1437200 | -7.84   | 0.191  | 0.918 | 6.67   | 0.132  | 0.919 |
| PF3D7_1126500 | 2.1     | 0.169  | 0.918 | 0.635  | 0.666  | 0.952 |
| PF3D7_1419900 | -13.8   | 0.121  | 0.918 | 17.3   | 0.0826 | 0.919 |
| PF3D7_1007600 | -3.2    | 0.488  | 0.918 | 2.6    | 0.542  | 0.924 |
| PF3D7_0803200 | -2.29   | 0.453  | 0.918 | 2.34   | 0.452  | 0.919 |
| PF3D7_1426600 | 2.01    | 0.479  | 0.918 | -3.16  | 0.298  | 0.919 |
| PF3D7_0604600 | -3.21   | 0.592  | 0.918 | 3.46   | 0.55   | 0.924 |
| PF3D7_0115600 | -23.9   | 0.0507 | 0.918 | 20.3   | 0.0559 | 0.919 |
| PF3D7_0719600 | 1.03    | 0.822  | 0.956 | -2.65  | 0.606  | 0.939 |
| PF3D7_0616600 | -3.7    | 0.122  | 0.918 | 3.17   | 0.285  | 0.919 |
| PF3D7_1476200 | 1.75    | 0.654  | 0.921 | -10.5  | 0.0577 | 0.919 |
| PF3D7_1232300 | -1.06   | 0.635  | 0.919 | 2      | 0.482  | 0.92  |
| PF3D7_0107400 | -5.69   | 0.15   | 0.918 | 2.88   | 0.297  | 0.919 |
| PF3D7_1464200 | -13.1   | 0.0964 | 0.918 | 13.6   | 0.0869 | 0.919 |
| PF3D7_1463800 | -1.26   | 0.724  | 0.937 | 0.964  | 0.839  | 0.974 |
| PF3D7_0418600 | 2.4     | 0.653  | 0.92  | -3.35  | 0.49   | 0.921 |
| PF3D7_0809200 | -1.42   | 0.279  | 0.918 | 0.743  | 0.568  | 0.931 |
| PF3D7_0805700 | -0.536  | 0.592  | 0.918 | 0.53   | 0.705  | 0.954 |
| PF3D7_0219700 | -3.18   | 0.12   | 0.918 | 2.14   | 0.222  | 0.919 |
| PF3D7_1216100 | 3.74    | 0.262  | 0.918 | 0.598  | 0.87   | 0.981 |
| PF3D7_1329600 | 2.91    | 0.288  | 0.918 | -3.24  | 0.236  | 0.919 |
| PF3D7_0602000 | 1.23    | 0.599  | 0.918 | -1.59  | 0.486  | 0.92  |
| PF3D7_0602900 | -1.61   | 0.268  | 0.918 | 0.335  | 0.903  | 0.984 |
| PF3D7_1217900 | -0.578  | 0.373  | 0.918 | 2.75   | 0.357  | 0.919 |
| PF3D7_1411700 | -0.0399 | 0.99   | 0.999 | 1.74   | 0.55   | 0.924 |
| PF3D7_1477900 | -4.08   | 0.169  | 0.918 | 6.12   | 0.113  | 0.919 |
| PF3D7_0827100 | -3.94   | 0.199  | 0.918 | 3.41   | 0.211  | 0.919 |
| PF3D7_0706400 | 0.327   | 0.844  | 0.963 | -3.72  | 0.552  | 0.924 |
| PF3D7_1317800 | -3.33   | 0.156  | 0.918 | 4.04   | 0.13   | 0.919 |
| PF11_0093     | 3.72    | 0.347  | 0.918 | -5.73  | 0.211  | 0.919 |
| PFI0145w      | -3.47   | 0.294  | 0.918 | 2.69   | 0.419  | 0.919 |
| PF3D7_1307000 | -5.23   | 0.0885 | 0.918 | 6.04   | 0.0947 | 0.919 |
| PF3D7_1221700 | -3.57   | 0.348  | 0.918 | 2.75   | 0.52   | 0.924 |
| PFC10_API0059 | -3.25   | 0.574  | 0.918 | 9.99   | 0.149  | 0.919 |
| PF3D7_1222400 | -2.05   | 0.454  | 0.918 | 5.63   | 0.187  | 0.919 |
| PF3D7_0627700 | -0.121  | 0.801  | 0.953 | -0.32  | 0.815  | 0.968 |
| PF3D7_1233600 | -2.83   | 0.242  | 0.918 | 1.18   | 0.73   | 0.957 |
| PF3D7_0912900 | 12.3    | 0.0982 | 0.918 | -10.1  | 0.156  | 0.919 |
| PF3D7_1333600 | -0.271  | 0.732  | 0.937 | 0.0604 | 0.956  | 0.994 |
| PF3D7_0731600 | 1.25    | 0.772  | 0.943 | 2.85   | 0.513  | 0.924 |

|               |         |       |       |         |        |       |
|---------------|---------|-------|-------|---------|--------|-------|
| PF3D7_0700400 | 0.895   | 0.501 | 0.918 | -0.507  | 0.702  | 0.954 |
| PF3D7_1302200 | 10.2    | 0.107 | 0.918 | -9.33   | 0.132  | 0.919 |
| PF3D7_1451800 | -1.89   | 0.58  | 0.918 | 3.53    | 0.329  | 0.919 |
| PF3D7_0726900 | 2.03    | 0.551 | 0.918 | -1.51   | 0.648  | 0.95  |
| PF3D7_1445500 | 1.74    | 0.429 | 0.918 | -2.47   | 0.396  | 0.919 |
| PF3D7_0518000 | -0.243  | 0.927 | 0.986 | -3.02   | 0.358  | 0.919 |
| PF3D7_1306900 | -6.82   | 0.169 | 0.918 | 4.24    | 0.376  | 0.919 |
| PF3D7_0419200 | -3.71   | 0.496 | 0.918 | 6.39    | 0.196  | 0.919 |
| PF3D7_1032900 | 0.702   | 0.356 | 0.918 | 0.947   | 0.527  | 0.924 |
| PF3D7_1134800 | -12.4   | 0.101 | 0.918 | 17.6    | 0.0685 | 0.919 |
| PF3D7_1311600 | -0.995  | 0.774 | 0.943 | 0.564   | 0.878  | 0.981 |
| PF3D7_1219100 | -0.0502 | 0.978 | 0.997 | 0.637   | 0.683  | 0.954 |
| PF3D7_1324900 | 3.8     | 0.334 | 0.918 | -1.51   | 0.641  | 0.95  |
| PF3D7_0623100 | -0.341  | 0.834 | 0.96  | 5.2     | 0.169  | 0.919 |
| PF3D7_1449900 | 0.833   | 0.845 | 0.963 | -0.297  | 0.926  | 0.989 |
| PF3D7_1024900 | 2.4     | 0.449 | 0.918 | -2.5    | 0.445  | 0.919 |
| PF3D7_1412000 | 3.89    | 0.375 | 0.918 | -1.81   | 0.67   | 0.954 |
| PF3D7_1365900 | 0.0895  | 0.98  | 0.997 | 0.458   | 0.938  | 0.994 |
| PF3D7_0626900 | 3.38    | 0.395 | 0.918 | -2.68   | 0.467  | 0.919 |
| PF3D7_0517400 | -5.8    | 0.312 | 0.918 | 7.49    | 0.228  | 0.919 |
| PF3D7_1205600 | -12.2   | 0.108 | 0.918 | 4.58    | 0.396  | 0.919 |
| PF3D7_1341300 | -2      | 0.658 | 0.921 | 0.0522  | 0.99   | 0.998 |
| PF3D7_0316700 | -1.56   | 0.422 | 0.918 | 0.987   | 0.653  | 0.95  |
| PF3D7_1249800 | -0.404  | 0.633 | 0.919 | 0.0487  | 0.983  | 0.998 |
| PF3D7_0816700 | 1.43    | 0.515 | 0.918 | 0.131   | 0.951  | 0.994 |
| PF3D7_0406400 | 1.09    | 0.586 | 0.918 | 0.562   | 0.871  | 0.981 |
| PF3D7_1241600 | -1.68   | 0.616 | 0.919 | 2.05    | 0.631  | 0.946 |
| PFI1420w      | 0.404   | 0.914 | 0.984 | 3.32    | 0.416  | 0.919 |
| PF3D7_1423500 | -1.22   | 0.624 | 0.919 | 1.51    | 0.527  | 0.924 |
| PF3D7_1206500 | 3.33    | 0.461 | 0.918 | -5.47   | 0.344  | 0.919 |
| PF3D7_1338900 | 5.53    | 0.192 | 0.918 | -1.67   | 0.533  | 0.924 |
| PF3D7_0824300 | 1.15    | 0.589 | 0.918 | -1.19   | 0.563  | 0.93  |
| PF3D7_1248000 | -0.283  | 0.897 | 0.98  | 3.05    | 0.238  | 0.919 |
| PF3D7_0807900 | -3.02   | 0.433 | 0.918 | 3.96    | 0.291  | 0.919 |
| PF3D7_0515700 | -5.06   | 0.351 | 0.918 | 6.14    | 0.208  | 0.919 |
| PF3D7_0911500 | -1.62   | 0.536 | 0.918 | 4.24    | 0.238  | 0.919 |
| PF3D7_1222000 | 3.33    | 0.187 | 0.918 | -1.87   | 0.446  | 0.919 |
| PF3D7_0911100 | 1.03    | 0.267 | 0.918 | 0.719   | 0.705  | 0.954 |
| PF3D7_1362900 | 2.47    | 0.447 | 0.918 | -2.28   | 0.484  | 0.92  |
| PF3D7_0115400 | -0.52   | 0.479 | 0.918 | 0.15    | 0.816  | 0.968 |
| PF3D7_1446500 | -0.0823 | 0.953 | 0.992 | 1.76    | 0.407  | 0.919 |
| PF3D7_0424500 | -0.198  | 0.952 | 0.992 | 0.749   | 0.797  | 0.965 |
| PF3D7_0115000 | -1.29   | 0.616 | 0.919 | 2.49    | 0.314  | 0.919 |
| PF3D7_1443900 | 2.43    | 0.43  | 0.918 | -1.62   | 0.71   | 0.955 |
| PF3D7_0215400 | -5.07   | 0.196 | 0.918 | 3.59    | 0.423  | 0.919 |
| PF3D7_0722700 | 0.495   | 0.641 | 0.919 | -0.0354 | 0.984  | 0.998 |
| PF3D7_1410200 | 0.154   | 0.969 | 0.994 | 0.835   | 0.861  | 0.98  |



|               |        |        |       |         |        |       |
|---------------|--------|--------|-------|---------|--------|-------|
| PF3D7_0529800 | -4.66  | 0.166  | 0.918 | 2.53    | 0.424  | 0.919 |
| PF3D7_0304100 | 1.73   | 0.291  | 0.918 | 2.23    | 0.379  | 0.919 |
| PF3D7_1104600 | 2.59   | 0.438  | 0.918 | -0.467  | 0.84   | 0.975 |
| PF3D7_1413500 | -0.156 | 0.96   | 0.992 | -3.01   | 0.486  | 0.92  |
| PF3D7_0924400 | 1.31   | 0.436  | 0.918 | 0.0587  | 0.979  | 0.998 |
| PF3D7_0111300 | 4.3    | 0.137  | 0.918 | 0.0778  | 0.978  | 0.998 |
| PF3D7_0832200 | -3.93  | 0.231  | 0.918 | -0.0603 | 0.973  | 0.998 |
| PF3D7_0302000 | -2.32  | 0.214  | 0.918 | 2.96    | 0.195  | 0.919 |
| PF3D7_0617100 | -1.02  | 0.691  | 0.928 | 0.89    | 0.727  | 0.957 |
| PF3D7_1243800 | 3.13   | 0.413  | 0.918 | -3.42   | 0.475  | 0.919 |
| PF3D7_1443800 | -1.38  | 0.685  | 0.926 | -1.67   | 0.691  | 0.954 |
| PF3D7_0823800 | 0.0403 | 0.989  | 0.999 | 1.55    | 0.633  | 0.948 |
| PF3D7_0516200 | 3      | 0.354  | 0.918 | -1.24   | 0.794  | 0.965 |
| PF3D7_0808600 | -4.93  | 0.392  | 0.918 | 8.9     | 0.0786 | 0.919 |
| PF3D7_1116700 | -0.913 | 0.81   | 0.953 | 2.15    | 0.584  | 0.933 |
| PF3D7_1128000 | 2.12   | 0.467  | 0.918 | -2.45   | 0.389  | 0.919 |
| PF3D7_1371800 | -0.305 | 0.893  | 0.98  | -1.74   | 0.525  | 0.924 |
| PF3D7_0828700 | 1.19   | 0.516  | 0.918 | -0.91   | 0.602  | 0.937 |
| PF3D7_0517900 | 2.75   | 0.347  | 0.918 | 0.608   | 0.88   | 0.981 |
| PF3D7_0104400 | 4.94   | 0.361  | 0.918 | 0.308   | 0.955  | 0.994 |
| PF3D7_0830600 | -2.14  | 0.105  | 0.918 | 0.862   | 0.467  | 0.919 |
| PF3D7_1010400 | 5.45   | 0.175  | 0.918 | -2.36   | 0.278  | 0.919 |
| PF3D7_0513200 | -0.842 | 0.492  | 0.918 | 2.28    | 0.161  | 0.919 |
| PF3D7_0319900 | -3.06  | 0.455  | 0.918 | 4.21    | 0.231  | 0.919 |
| PF3D7_0730200 | -0.592 | 0.782  | 0.945 | 1.34    | 0.534  | 0.924 |
| PF3D7_0810200 | 3.55   | 0.485  | 0.918 | -3.07   | 0.55   | 0.924 |
| PF3D7_0926500 | -0.615 | 0.641  | 0.919 | 0.418   | 0.827  | 0.97  |
| PF3D7_1009700 | 2.65   | 0.476  | 0.918 | -3.41   | 0.384  | 0.919 |
| PF3D7_1478400 | -2.77  | 0.426  | 0.918 | 1.66    | 0.672  | 0.954 |
| PF3D7_1252700 | -4.21  | 0.0949 | 0.918 | 3.93    | 0.0702 | 0.919 |
| PF3D7_1302500 | 0.47   | 0.563  | 0.918 | 0.238   | 0.837  | 0.973 |
| PF3D7_1312900 | -0.326 | 0.517  | 0.918 | 1.52    | 0.158  | 0.919 |
| PF3D7_0605800 | 3.85   | 0.291  | 0.918 | -3.57   | 0.308  | 0.919 |
| PF3D7_0814700 | 4.56   | 0.233  | 0.918 | -4.3    | 0.248  | 0.919 |
| PF3D7_1000300 | -0.891 | 0.641  | 0.919 | -0.138  | 0.95   | 0.994 |
| PF3D7_1451900 | -1.5   | 0.732  | 0.937 | 0.564   | 0.908  | 0.984 |
| PF3D7_1341500 | 4.09   | 0.202  | 0.918 | -5.43   | 0.204  | 0.919 |
| PF3D7_1362300 | 0.321  | 0.887  | 0.979 | -0.849  | 0.686  | 0.954 |
| PF3D7_0305400 | -2.63  | 0.553  | 0.918 | 2.68    | 0.596  | 0.936 |
| PF3D7_0924100 | 4.04   | 0.383  | 0.918 | -5.25   | 0.305  | 0.919 |
| PF3D7_0816100 | 4.03   | 0.543  | 0.918 | 0.431   | 0.921  | 0.989 |
| PF3D7_1357400 | 3.23   | 0.264  | 0.918 | -0.916  | 0.78   | 0.963 |
| PF3D7_1225500 | 0.14   | 0.959  | 0.992 | -1.24   | 0.801  | 0.965 |
| PF3D7_0807400 | 7.49   | 0.253  | 0.918 | -10.8   | 0.199  | 0.919 |
| PF3D7_1402200 | -12.9  | 0.0787 | 0.918 | 16.6    | 0.0413 | 0.919 |
| PF3D7_0826000 | -0.251 | 0.881  | 0.978 | -0.98   | 0.548  | 0.924 |
| PF3D7_1040700 | -0.507 | 0.776  | 0.943 | 0.121   | 0.951  | 0.994 |

|               |         |        |       |         |        |       |
|---------------|---------|--------|-------|---------|--------|-------|
| PF3D7_0618800 | -2.67   | 0.536  | 0.918 | 4.12    | 0.396  | 0.919 |
| PF3D7_1245300 | -2.17   | 0.618  | 0.919 | 1.21    | 0.784  | 0.963 |
| PF3D7_1373500 | 0.346   | 0.532  | 0.918 | -0.0715 | 0.925  | 0.989 |
| PF3D7_0624600 | 0.383   | 0.644  | 0.919 | -0.0319 | 0.972  | 0.998 |
| PF3D7_0810900 | -1.04   | 0.845  | 0.963 | 5.11    | 0.272  | 0.919 |
| PF3D7_0728000 | -4.71   | 0.0895 | 0.918 | 3.78    | 0.313  | 0.919 |
| PF3D7_0521900 | -9.39   | 0.079  | 0.918 | 6.91    | 0.182  | 0.919 |
| PF3D7_0205500 | 2.53    | 0.464  | 0.918 | -2.69   | 0.557  | 0.927 |
| PF3D7_1101200 | 0.788   | 0.349  | 0.918 | -0.495  | 0.632  | 0.947 |
| PF3D7_0700100 | 0.397   | 0.389  | 0.918 | -0.898  | 0.278  | 0.919 |
| PF3D7_0422100 | -1.16   | 0.127  | 0.918 | 2.15    | 0.0397 | 0.919 |
| PF3D7_0107700 | 0.42    | 0.934  | 0.987 | 3.8     | 0.313  | 0.919 |
| PF3D7_1471200 | 3.43    | 0.248  | 0.918 | -0.28   | 0.932  | 0.992 |
| PF3D7_0920400 | -2.95   | 0.338  | 0.918 | 4.47    | 0.156  | 0.919 |
| PF3D7_0422800 | 16      | 0.115  | 0.918 | -8.63   | 0.305  | 0.919 |
| PF3D7_0704900 | -0.527  | 0.74   | 0.938 | 0.257   | 0.87   | 0.981 |
| PF3D7_0528300 | -0.262  | 0.726  | 0.937 | 0.107   | 0.943  | 0.994 |
| PF3D7_0927200 | -6.55   | 0.377  | 0.918 | 5.8     | 0.418  | 0.919 |
| PF14_0257     | -4.59   | 0.299  | 0.918 | 1.64    | 0.738  | 0.957 |
| PF3D7_1442800 | -6.45   | 0.117  | 0.918 | 6.96    | 0.0916 | 0.919 |
| PF3D7_0615400 | 1.7     | 0.264  | 0.918 | -2.24   | 0.202  | 0.919 |
| PF3D7_1364000 | -0.524  | 0.831  | 0.959 | 0.435   | 0.842  | 0.975 |
| PF3D7_1008600 | -2.6    | 0.205  | 0.918 | 2.45    | 0.266  | 0.919 |
| PF3D7_1331000 | -8.27   | 0.104  | 0.918 | 8.72    | 0.106  | 0.919 |
| PF3D7_0716700 | 7.57    | 0.209  | 0.918 | -10.5   | 0.0631 | 0.919 |
| PF3D7_0626600 | 6.03    | 0.338  | 0.918 | 7.7     | 0.146  | 0.919 |
| PF3D7_0426000 | -4.44   | 0.115  | 0.918 | 7.8     | 0.0635 | 0.919 |
| PF3D7_0617300 | 8.38    | 0.188  | 0.918 | -14.4   | 0.0529 | 0.919 |
| PF3D7_1323600 | -10.2   | 0.0673 | 0.918 | 6.6     | 0.178  | 0.919 |
| PF3D7_1221300 | -3.21   | 0.13   | 0.918 | 5.21    | 0.0566 | 0.919 |
| PF3D7_0802000 | -2.56   | 0.269  | 0.918 | 0.335   | 0.945  | 0.994 |
| PF3D7_1253300 | -2.92   | 0.172  | 0.918 | 0.837   | 0.793  | 0.965 |
| PF3D7_0516900 | -6.19   | 0.101  | 0.918 | 1.22    | 0.722  | 0.957 |
| PF3D7_0324900 | 0.248   | 0.575  | 0.918 | -0.041  | 0.949  | 0.994 |
| PF3D7_1137300 | 1.57    | 0.66   | 0.921 | -0.486  | 0.894  | 0.982 |
| PF3D7_0214400 | 0.0503  | 0.99   | 0.999 | 2.01    | 0.642  | 0.95  |
| PF3D7_0415500 | -0.0398 | 0.992  | 0.999 | 3.63    | 0.538  | 0.924 |
| PF3D7_1469300 | 5.02    | 0.153  | 0.918 | -19.3   | 0.0968 | 0.919 |
| PF3D7_0301000 | -3.32   | 0.386  | 0.918 | -0.651  | 0.893  | 0.982 |
| PF3D7_1225400 | 3.82    | 0.25   | 0.918 | -7.28   | 0.158  | 0.919 |
| PF3D7_1134300 | 1.21    | 0.536  | 0.918 | -1.11   | 0.564  | 0.93  |
| PF3D7_1017000 | 2.6     | 0.283  | 0.918 | -2.28   | 0.32   | 0.919 |
| PF3D7_0728700 | -5.95   | 0.31   | 0.918 | 5.55    | 0.335  | 0.919 |
| PF3D7_1225600 | -3.86   | 0.149  | 0.918 | 1.95    | 0.565  | 0.931 |
| PF3D7_0512200 | -5.53   | 0.262  | 0.918 | 3.86    | 0.55   | 0.924 |
| PF3D7_1402700 | -2.92   | 0.458  | 0.918 | 1.04    | 0.768  | 0.962 |
| PF3D7_1143200 | 2.89    | 0.503  | 0.918 | -5.49   | 0.303  | 0.919 |

|               |         |        |       |        |        |       |
|---------------|---------|--------|-------|--------|--------|-------|
| PF3D7_1019100 | -0.286  | 0.953  | 0.992 | -1.31  | 0.792  | 0.965 |
| PF3D7_0202000 | 0.963   | 0.733  | 0.937 | 1.2    | 0.571  | 0.931 |
| PF3D7_1003200 | -2.11   | 0.412  | 0.918 | 1.91   | 0.501  | 0.924 |
| PF3D7_1140400 | -2.18   | 0.303  | 0.918 | 0.449  | 0.878  | 0.981 |
| PF3D7_0418900 | -4.82   | 0.283  | 0.918 | 4.99   | 0.219  | 0.919 |
| PF3D7_1243700 | 8.58    | 0.11   | 0.918 | -1.76  | 0.703  | 0.954 |
| PF3D7_0316200 | 3.17    | 0.547  | 0.918 | 1.35   | 0.82   | 0.968 |
| PF3D7_0220600 | 0.603   | 0.844  | 0.963 | 0.321  | 0.908  | 0.984 |
| PF3D7_1311700 | 0.0804  | 0.966  | 0.993 | -3.59  | 0.398  | 0.919 |
| PF3D7_0629000 | 1.23    | 0.575  | 0.918 | 0.855  | 0.809  | 0.967 |
| PF3D7_1006500 | 0.653   | 0.838  | 0.961 | 2.11   | 0.311  | 0.919 |
| PF3D7_0934900 | -2.97   | 0.486  | 0.918 | 4.19   | 0.512  | 0.924 |
| PF3D7_0833300 | 0.616   | 0.504  | 0.918 | 0.256  | 0.751  | 0.961 |
| PF3D7_0902600 | 3       | 0.371  | 0.918 | -1.71  | 0.593  | 0.936 |
| PF3D7_0704600 | -0.191  | 0.803  | 0.953 | 0.268  | 0.708  | 0.954 |
| PF3D7_0520800 | -0.409  | 0.679  | 0.923 | -0.585 | 0.657  | 0.95  |
| PF3D7_1361700 | -0.407  | 0.641  | 0.919 | 1.02   | 0.358  | 0.919 |
| PF3D7_1009000 | 1.76    | 0.607  | 0.918 | -1.74  | 0.588  | 0.934 |
| PF3D7_1040600 | -2.46   | 0.447  | 0.918 | 2.39   | 0.483  | 0.92  |
| PF3D7_1313300 | 0.378   | 0.944  | 0.989 | -1.26  | 0.83   | 0.972 |
| PF3D7_0707300 | -4.22   | 0.264  | 0.918 | 3.75   | 0.307  | 0.919 |
| PF3D7_0603200 | 1.02    | 0.691  | 0.928 | -2.77  | 0.459  | 0.919 |
| PF3D7_0203800 | -6.28   | 0.0834 | 0.918 | 9.52   | 0.0958 | 0.919 |
| PF3D7_0714500 | -3.76   | 0.17   | 0.918 | 3.27   | 0.24   | 0.919 |
| PF3D7_0302700 | 1.56    | 0.628  | 0.919 | -2.62  | 0.472  | 0.919 |
| PF3D7_0603300 | -9.68   | 0.256  | 0.918 | 9.26   | 0.277  | 0.919 |
| PF3D7_0937300 | -2.57   | 0.586  | 0.918 | 1.78   | 0.707  | 0.954 |
| PF3D7_0205700 | 1.52    | 0.465  | 0.918 | -3.31  | 0.43   | 0.919 |
| PF3D7_1143100 | -6.42   | 0.256  | 0.918 | 8.28   | 0.193  | 0.919 |
| PFB0795w      | -0.0142 | 0.996  | 0.999 | 3.53   | 0.447  | 0.919 |
| PF3D7_1476700 | -7.07   | 0.297  | 0.918 | 9.54   | 0.157  | 0.919 |
| PF3D7_1467100 | -12.5   | 0.0884 | 0.918 | 12.8   | 0.0759 | 0.919 |
| PF3D7_0619900 | 4.84    | 0.2    | 0.918 | -6     | 0.124  | 0.919 |
| PFA0350c      | 0.761   | 0.526  | 0.918 | -0.465 | 0.651  | 0.95  |
| PF3D7_0609200 | 1.09    | 0.761  | 0.941 | 4.43   | 0.302  | 0.919 |
| PF3D7_1351400 | -5.21   | 0.147  | 0.918 | 0.784  | 0.831  | 0.972 |
| PF3D7_1016700 | -1.98   | 0.334  | 0.918 | 3.73   | 0.222  | 0.919 |
| PF3D7_1238600 | 0.41    | 0.901  | 0.98  | -0.82  | 0.803  | 0.965 |
| PF3D7_1413200 | -6.22   | 0.119  | 0.918 | 3.64   | 0.227  | 0.919 |
| PFC0700c      | 0.348   | 0.902  | 0.98  | 3.16   | 0.274  | 0.919 |
| PF3D7_1240600 | -11.6   | 0.228  | 0.918 | 16.9   | 0.108  | 0.919 |
| PF3D7_1127700 | -0.352  | 0.784  | 0.947 | 0.581  | 0.776  | 0.963 |
| PF3D7_1434900 | 0.868   | 0.547  | 0.918 | 2.36   | 0.297  | 0.919 |
| PF3D7_0102700 | 2.41    | 0.499  | 0.918 | -2.72  | 0.493  | 0.921 |
| PF3D7_1340600 | -0.644  | 0.647  | 0.919 | 1.31   | 0.453  | 0.919 |
| PF3D7_1457500 | 0.315   | 0.885  | 0.979 | 7.32   | 0.123  | 0.919 |
| PF3D7_1326500 | 7.78    | 0.191  | 0.918 | -8.89  | 0.136  | 0.919 |

|               |        |        |       |        |        |       |
|---------------|--------|--------|-------|--------|--------|-------|
| PF3D7_0525400 | -5.92  | 0.18   | 0.918 | 4.58   | 0.212  | 0.919 |
| PF3D7_1404200 | -2.09  | 0.462  | 0.918 | 3.62   | 0.374  | 0.919 |
| PF3D7_0611100 | 4.66   | 0.323  | 0.918 | -4.54  | 0.407  | 0.919 |
| PF3D7_1122700 | -1.61  | 0.282  | 0.918 | 3.31   | 0.168  | 0.919 |
| PF3D7_1121800 | -0.17  | 0.777  | 0.943 | 1.77   | 0.0788 | 0.919 |
| PF3D7_1210100 | -1.08  | 0.492  | 0.918 | 1.79   | 0.285  | 0.919 |
| PF3D7_0930700 | -6.55  | 0.215  | 0.918 | 8.58   | 0.113  | 0.919 |
| PF11_0247     | 0.365  | 0.914  | 0.984 | -0.199 | 0.954  | 0.994 |
| PF3D7_1244100 | -6.58  | 0.104  | 0.918 | 8.72   | 0.0707 | 0.919 |
| PF3D7_0611300 | 1.75   | 0.383  | 0.918 | -0.931 | 0.676  | 0.954 |
| PF3D7_0610600 | -2.01  | 0.437  | 0.918 | 4.13   | 0.166  | 0.919 |
| PF3D7_0505100 | 0.478  | 0.55   | 0.918 | -0.9   | 0.495  | 0.921 |
| PF3D7_1468700 | 3.99   | 0.486  | 0.918 | 7.23   | 0.178  | 0.919 |
| PF3D7_1410400 | -0.416 | 0.76   | 0.941 | 0.388  | 0.788  | 0.964 |
| PF3D7_1213500 | -0.478 | 0.86   | 0.971 | 0.834  | 0.67   | 0.954 |
| PF3D7_0509800 | 3.43   | 0.282  | 0.918 | -1.83  | 0.58   | 0.933 |
| PF3D7_1331300 | 8.15   | 0.152  | 0.918 | 0.277  | 0.948  | 0.994 |
| PF3D7_0810500 | -6.21  | 0.445  | 0.918 | 6.93   | 0.406  | 0.919 |
| PF3D7_1103100 | -1.16  | 0.626  | 0.919 | 3.97   | 0.146  | 0.919 |
| PF3D7_1333200 | -1.28  | 0.649  | 0.92  | 2.78   | 0.36   | 0.919 |
| PF3D7_1440600 | -2.09  | 0.718  | 0.937 | 1.16   | 0.844  | 0.975 |
| PF3D7_1319200 | -1.57  | 0.641  | 0.919 | 2.9    | 0.639  | 0.95  |
| PF3D7_1353900 | 2.83   | 0.455  | 0.918 | -4.65  | 0.299  | 0.919 |
| PF3D7_1130700 | -1.76  | 0.497  | 0.918 | 2.5    | 0.561  | 0.927 |
| PF3D7_0628800 | -9.24  | 0.0836 | 0.918 | 7.84   | 0.185  | 0.919 |
| PF3D7_0900400 | -5.14  | 0.382  | 0.918 | 5.28   | 0.355  | 0.919 |
| MAL8P1.320    | 4.37   | 0.283  | 0.918 | -11.3  | 0.107  | 0.919 |
| PF3D7_1441500 | -0.308 | 0.922  | 0.985 | 2.66   | 0.283  | 0.919 |
| PF3D7_0406500 | -0.423 | 0.547  | 0.918 | 0.525  | 0.623  | 0.942 |
| PF3D7_0305300 | -1.95  | 0.439  | 0.918 | 1.63   | 0.521  | 0.924 |
| PF3D7_1340800 | -2.16  | 0.6    | 0.918 | 3.81   | 0.38   | 0.919 |
| PF3D7_0605200 | -3.96  | 0.484  | 0.918 | 10.4   | 0.275  | 0.919 |
| PF3D7_0903900 | -2.04  | 0.631  | 0.919 | 2.73   | 0.565  | 0.93  |
| PF3D7_1108800 | -3.07  | 0.565  | 0.918 | 1.48   | 0.726  | 0.957 |
| PF3D7_0902500 | -1.37  | 0.545  | 0.918 | 2.33   | 0.35   | 0.919 |
| PF3D7_0400900 | 4.16   | 0.338  | 0.918 | -3.51  | 0.384  | 0.919 |
| PF3D7_1026100 | 0.796  | 0.773  | 0.943 | -0.739 | 0.757  | 0.962 |
| PF3D7_0223100 | 6.34   | 0.162  | 0.918 | -4.75  | 0.242  | 0.919 |
| PF3D7_1251500 | -1.09  | 0.815  | 0.953 | -0.17  | 0.974  | 0.998 |
| PF3D7_1207400 | -6.56  | 0.218  | 0.918 | 4      | 0.506  | 0.924 |
| PF3D7_0809100 | -2.89  | 0.187  | 0.918 | 5.62   | 0.107  | 0.919 |
| PF3D7_1032400 | -0.14  | 0.972  | 0.995 | 1.92   | 0.628  | 0.945 |
| PF3D7_0500100 | 0.24   | 0.822  | 0.956 | 0.728  | 0.53   | 0.924 |
| PF11_0382     | -2.74  | 0.415  | 0.918 | 3.41   | 0.484  | 0.92  |
| PF3D7_0629100 | -1.77  | 0.647  | 0.919 | 6.68   | 0.118  | 0.919 |
| PF3D7_0401400 | -0.042 | 0.957  | 0.992 | 0.272  | 0.785  | 0.963 |
| PF3D7_1423300 | -4.97  | 0.299  | 0.918 | -0.352 | 0.938  | 0.994 |

|               |        |        |       |        |        |       |
|---------------|--------|--------|-------|--------|--------|-------|
| PF3D7_0608600 | -10.6  | 0.217  | 0.918 | 13.4   | 0.0995 | 0.919 |
| PF3D7_0201900 | -10.9  | 0.0776 | 0.918 | 2.79   | 0.517  | 0.924 |
| PF3D7_0933500 | -5.7   | 0.125  | 0.918 | 8.19   | 0.154  | 0.919 |
| PF3D7_0928400 | 2.87   | 0.435  | 0.918 | -7.16  | 0.09   | 0.919 |
| PF3D7_0610400 | 4.93   | 0.254  | 0.918 | -5.77  | 0.219  | 0.919 |
| PF3D7_0111500 | -1.76  | 0.494  | 0.918 | 1.3    | 0.606  | 0.939 |
| PF3D7_0525700 | -12.5  | 0.147  | 0.918 | 11.3   | 0.158  | 0.919 |
| PF3D7_0512600 | -0.237 | 0.95   | 0.992 | -1.13  | 0.751  | 0.961 |
| PF3D7_0201200 | -4.37  | 0.298  | 0.918 | 4.15   | 0.281  | 0.919 |
| MAL8P1.156    | -3.33  | 0.22   | 0.918 | 6.94   | 0.0671 | 0.919 |
| PF3D7_0409600 | -0.622 | 0.508  | 0.918 | 1.04   | 0.31   | 0.919 |
| PF3D7_0616100 | -1.08  | 0.586  | 0.918 | 0.374  | 0.905  | 0.984 |
| PF3D7_0802100 | -4.58  | 0.338  | 0.918 | 4.16   | 0.379  | 0.919 |
| PF3D7_0620100 | -5.86  | 0.172  | 0.918 | 4.19   | 0.272  | 0.919 |
| PF3D7_1474100 | -2.38  | 0.659  | 0.921 | 1.18   | 0.762  | 0.962 |
| PF3D7_1144800 | -2.19  | 0.709  | 0.933 | 1.7    | 0.773  | 0.963 |
| PF3D7_1435800 | 6.73   | 0.242  | 0.918 | -6.16  | 0.282  | 0.919 |
| PF3D7_0415000 | -4.12  | 0.146  | 0.918 | 0.622  | 0.835  | 0.972 |
| PF3D7_1369100 | 1.78   | 0.363  | 0.918 | 1.59   | 0.596  | 0.936 |
| PF3D7_0922000 | -2.61  | 0.345  | 0.918 | 4.7    | 0.442  | 0.919 |
| PF3D7_1332100 | 2.06   | 0.467  | 0.918 | 3.91   | 0.358  | 0.919 |
| PF3D7_1355700 | -0.511 | 0.777  | 0.943 | 0.654  | 0.815  | 0.968 |
| PF3D7_0422400 | -5.51  | 0.0972 | 0.918 | 2.39   | 0.408  | 0.919 |
| PF3D7_1301500 | -0.433 | 0.499  | 0.918 | 0.945  | 0.247  | 0.919 |
| PF3D7_1320000 | -5.1   | 0.189  | 0.918 | 6.5    | 0.211  | 0.919 |
| PF3D7_0912500 | -15.2  | 0.0803 | 0.918 | 17.6   | 0.0534 | 0.919 |
| PF3D7_0214000 | -2.55  | 0.554  | 0.918 | 4      | 0.342  | 0.919 |
| PF3D7_0907100 | 7.88   | 0.0926 | 0.918 | -3.24  | 0.347  | 0.919 |
| PF3D7_0804700 | 3.76   | 0.317  | 0.918 | -4.27  | 0.263  | 0.919 |
| PF3D7_0933100 | -0.861 | 0.817  | 0.953 | 1.84   | 0.691  | 0.954 |
| PF3D7_0415400 | -2.06  | 0.509  | 0.918 | 4.02   | 0.24   | 0.919 |
| PF3D7_0525100 | 1.95   | 0.538  | 0.918 | 0.299  | 0.923  | 0.989 |
| PF3D7_1471300 | 0.816  | 0.756  | 0.941 | -3.5   | 0.319  | 0.919 |
| PF3D7_0612500 | 0.259  | 0.901  | 0.98  | 4.13   | 0.43   | 0.919 |
| PF3D7_0721600 | -0.416 | 0.886  | 0.979 | 3.7    | 0.276  | 0.919 |
| PF3D7_0217500 | -0.474 | 0.876  | 0.978 | -2.58  | 0.373  | 0.919 |
| PF3D7_0604500 | -0.409 | 0.527  | 0.918 | 0.952  | 0.253  | 0.919 |
| PF3D7_0923100 | -11.5  | 0.098  | 0.918 | 10.8   | 0.107  | 0.919 |
| PF3D7_0806700 | 2      | 0.56   | 0.918 | -1.16  | 0.744  | 0.958 |
| mal_mito_1    | 3.99   | 0.444  | 0.918 | 1.31   | 0.697  | 0.954 |
| PF3D7_0214500 | 2.61   | 0.411  | 0.918 | -1.16  | 0.733  | 0.957 |
| PF3D7_1124500 | -0.578 | 0.762  | 0.941 | 2.6    | 0.298  | 0.919 |
| PF3D7_1200600 | 0.298  | 0.609  | 0.919 | -0.364 | 0.651  | 0.95  |
| PF3D7_1126100 | 0.174  | 0.807  | 0.953 | 0.255  | 0.779  | 0.963 |
| PF3D7_1244500 | -3.07  | 0.164  | 0.918 | 2.05   | 0.212  | 0.919 |
| PF3D7_0917100 | 2.39   | 0.419  | 0.918 | -2.92  | 0.332  | 0.919 |
| PF3D7_1423100 | 4.12   | 0.293  | 0.918 | -8.09  | 0.23   | 0.919 |

|               |         |        |       |         |        |       |
|---------------|---------|--------|-------|---------|--------|-------|
| PF3D7_1211600 | 4.72    | 0.163  | 0.918 | -6.16   | 0.145  | 0.919 |
| PF3D7_1308400 | -1.84   | 0.528  | 0.918 | 0.127   | 0.967  | 0.997 |
| PF3D7_1475000 | 4.55    | 0.196  | 0.918 | 0.175   | 0.961  | 0.995 |
| PF3D7_1127600 | -0.876  | 0.61   | 0.919 | 0.36    | 0.916  | 0.987 |
| PF3D7_0917500 | 1.87    | 0.548  | 0.918 | -3.75   | 0.356  | 0.919 |
| PF3D7_1224100 | 0.641   | 0.932  | 0.987 | 3.54    | 0.477  | 0.92  |
| PF3D7_1322100 | 0.248   | 0.889  | 0.979 | 3.52    | 0.288  | 0.919 |
| PF3D7_0317900 | -4.74   | 0.198  | 0.918 | 8.58    | 0.197  | 0.919 |
| PF3D7_1100100 | 0.298   | 0.752  | 0.94  | -0.22   | 0.845  | 0.975 |
| PF3D7_1452600 | 0.3     | 0.544  | 0.918 | 0.229   | 0.773  | 0.963 |
| PF3D7_1328100 | 4.55    | 0.24   | 0.918 | 3.51    | 0.356  | 0.919 |
| PF3D7_0811100 | 0.456   | 0.8    | 0.953 | 1.66    | 0.583  | 0.933 |
| PF3D7_0905000 | 4.53    | 0.388  | 0.918 | -4.88   | 0.34   | 0.919 |
| PF3D7_0632400 | 3.1     | 0.494  | 0.918 | -2.68   | 0.546  | 0.924 |
| PF3D7_1339400 | -5.94   | 0.212  | 0.918 | 3.95    | 0.365  | 0.919 |
| PF3D7_1470900 | -1.66   | 0.659  | 0.921 | 0.917   | 0.869  | 0.981 |
| PF3D7_0918800 | 7.05    | 0.166  | 0.918 | -2.17   | 0.666  | 0.952 |
| PF3D7_1359300 | 1.11    | 0.595  | 0.918 | -0.758  | 0.697  | 0.954 |
| PF3D7_0305500 | -0.0855 | 0.899  | 0.98  | 0.961   | 0.33   | 0.919 |
| PF3D7_0920700 | 2.49    | 0.341  | 0.918 | -2.34   | 0.373  | 0.919 |
| PF3D7_0100200 | 0.865   | 0.685  | 0.926 | -0.549  | 0.816  | 0.968 |
| PF3D7_0915800 | -9.28   | 0.128  | 0.918 | 11      | 0.122  | 0.919 |
| PF3D7_0625800 | -15.5   | 0.0563 | 0.918 | 14.6    | 0.0631 | 0.919 |
| PF3D7_1201300 | -2.08   | 0.461  | 0.918 | 1.75    | 0.546  | 0.924 |
| PF3D7_0723500 | -14.3   | 0.131  | 0.918 | 16.4    | 0.105  | 0.919 |
| PF3D7_0912600 | -0.135  | 0.905  | 0.98  | -1.12   | 0.372  | 0.919 |
| PF07_0087     | -7.89   | 0.148  | 0.918 | 14.5    | 0.087  | 0.919 |
| PF3D7_1236800 | 6.17    | 0.117  | 0.918 | 0.946   | 0.775  | 0.963 |
| PF3D7_1350100 | -2.58   | 0.519  | 0.918 | 3.09    | 0.462  | 0.919 |
| PF3D7_1442000 | 1.17    | 0.587  | 0.918 | -2.36   | 0.521  | 0.924 |
| PF3D7_1474500 | 0.824   | 0.756  | 0.941 | -0.968  | 0.724  | 0.957 |
| PF3D7_1146200 | -2.7    | 0.664  | 0.922 | -12     | 0.13   | 0.919 |
| PF3D7_0910400 | -1.79   | 0.408  | 0.918 | 3.37    | 0.279  | 0.919 |
| PF3D7_0309800 | -10.6   | 0.177  | 0.918 | 15.1    | 0.0978 | 0.919 |
| PF3D7_0513500 | -2.58   | 0.674  | 0.923 | 0.793   | 0.903  | 0.984 |
| PF3D7_1304700 | -1.07   | 0.545  | 0.918 | 1.59    | 0.386  | 0.919 |
| PF3D7_0216400 | 1.55    | 0.576  | 0.918 | 1       | 0.677  | 0.954 |
| PF3D7_1420800 | 1.54    | 0.557  | 0.918 | -0.537  | 0.844  | 0.975 |
| PF3D7_0936700 | -1.19   | 0.619  | 0.919 | 8       | 0.105  | 0.919 |
| PF3D7_1323100 | -1.25   | 0.736  | 0.937 | 1.22    | 0.767  | 0.962 |
| PF3D7_0715200 | 2.38    | 0.349  | 0.918 | 1.52    | 0.657  | 0.95  |
| PF3D7_1352200 | 11.4    | 0.0979 | 0.918 | -8.8    | 0.194  | 0.919 |
| PF3D7_0622700 | -6.94   | 0.176  | 0.918 | 7.13    | 0.171  | 0.919 |
| PF3D7_0700300 | 0.372   | 0.843  | 0.963 | -0.764  | 0.756  | 0.962 |
| PF3D7_0719300 | 0.807   | 0.805  | 0.953 | -1.65   | 0.646  | 0.95  |
| PF3D7_0414100 | 2.96    | 0.166  | 0.918 | -0.0941 | 0.94   | 0.994 |
| PF3D7_1105600 | -1      | 0.656  | 0.921 | 1.58    | 0.594  | 0.936 |

|               |        |       |       |        |       |       |
|---------------|--------|-------|-------|--------|-------|-------|
| PF3D7_0906500 | -0.072 | 0.846 | 0.963 | 0.956  | 0.139 | 0.919 |
| PF3D7_0923500 | -1.28  | 0.545 | 0.918 | 3.24   | 0.421 | 0.919 |
| PF3D7_0833000 | 3.23   | 0.442 | 0.918 | -3.16  | 0.449 | 0.919 |
| PF3D7_1141200 | 0.99   | 0.498 | 0.918 | 0.572  | 0.83  | 0.971 |
| PF3D7_1369400 | -0.686 | 0.477 | 0.918 | 1.03   | 0.418 | 0.919 |
| PF3D7_1014800 | -0.243 | 0.922 | 0.985 | -1.53  | 0.643 | 0.95  |
| PF3D7_0606500 | -1.3   | 0.248 | 0.918 | 0.334  | 0.699 | 0.954 |
| PF3D7_0113200 | 0.525  | 0.837 | 0.961 | 3.59   | 0.203 | 0.919 |
| PF3D7_1401600 | -0.345 | 0.921 | 0.985 | 2.42   | 0.564 | 0.93  |
| PF3D7_1338500 | -1.46  | 0.612 | 0.919 | 2.07   | 0.464 | 0.919 |
| PF3D7_1367900 | -1.99  | 0.394 | 0.918 | 3.52   | 0.159 | 0.919 |
| PF3D7_1349300 | 0.0684 | 0.822 | 0.956 | -0.19  | 0.772 | 0.963 |
| PF3D7_1352500 | -6.85  | 0.115 | 0.918 | 5.91   | 0.184 | 0.919 |
| PF3D7_0512400 | -3.72  | 0.312 | 0.918 | 3.93   | 0.282 | 0.919 |
| PF3D7_1120300 | 4.2    | 0.214 | 0.918 | -2.13  | 0.529 | 0.924 |
| PF3D7_1236500 | -3.39  | 0.349 | 0.918 | 3.15   | 0.331 | 0.919 |
| PF3D7_1110400 | -0.234 | 0.932 | 0.987 | 0.71   | 0.781 | 0.963 |
| PF3D7_0219300 | -1.66  | 0.551 | 0.918 | 3.3    | 0.172 | 0.919 |
| PF3D7_1017700 | 0.337  | 0.929 | 0.987 | -0.759 | 0.878 | 0.981 |
| PF3D7_0824700 | 1.03   | 0.561 | 0.918 | 0.468  | 0.828 | 0.97  |
| PF3D7_1135100 | -2.63  | 0.46  | 0.918 | 6.55   | 0.122 | 0.919 |
| PFC10_API0038 | 3.4    | 0.418 | 0.918 | -16.4  | 0.104 | 0.919 |
| PF3D7_0903400 | -0.344 | 0.911 | 0.983 | 0.225  | 0.93  | 0.991 |
| PF3D7_0517800 | -1.23  | 0.776 | 0.943 | 0.912  | 0.829 | 0.971 |
| PF3D7_1439800 | 0.472  | 0.875 | 0.977 | 0.432  | 0.899 | 0.983 |
| PF3D7_1114400 | 4.85   | 0.16  | 0.918 | -5.01  | 0.173 | 0.919 |
| PF3D7_0608800 | -0.751 | 0.624 | 0.919 | 1.6    | 0.48  | 0.92  |
| PF3D7_1410300 | 0.355  | 0.735 | 0.937 | -0.179 | 0.885 | 0.981 |
| PF3D7_0605900 | -7.31  | 0.108 | 0.918 | 6.42   | 0.266 | 0.919 |
| PF3D7_1426700 | -2.48  | 0.58  | 0.918 | 4.35   | 0.315 | 0.919 |
| PF3D7_1461200 | -0.024 | 0.996 | 0.999 | -0.597 | 0.905 | 0.984 |
| PF3D7_1007300 | 0.501  | 0.833 | 0.96  | -0.621 | 0.796 | 0.965 |
| PF3D7_1321500 | -6.37  | 0.191 | 0.918 | 7.81   | 0.138 | 0.919 |
| PF3D7_1137600 | -0.66  | 0.534 | 0.918 | 1.72   | 0.189 | 0.919 |
| PF3D7_1145800 | -0.382 | 0.904 | 0.98  | 1.62   | 0.694 | 0.954 |
| PF3D7_0901500 | 3.66   | 0.214 | 0.918 | -3.31  | 0.255 | 0.919 |
| PF3D7_0616800 | -0.984 | 0.617 | 0.919 | 0.9    | 0.649 | 0.95  |
| PF3D7_1215300 | -5.28  | 0.336 | 0.918 | 1.13   | 0.869 | 0.981 |
| PF3D7_0104300 | 2.29   | 0.564 | 0.918 | 0.574  | 0.832 | 0.972 |
| PF3D7_1425400 | 7.53   | 0.143 | 0.918 | -8.32  | 0.133 | 0.919 |
| PF3D7_1031100 | -5.02  | 0.497 | 0.918 | 7.39   | 0.348 | 0.919 |
| PF3D7_1453500 | -15.5  | 0.222 | 0.918 | 16.1   | 0.2   | 0.919 |
| PF3D7_0214300 | 0.0068 | 0.994 | 0.999 | -0.325 | 0.74  | 0.958 |
| PF3D7_0623000 | 3.39   | 0.381 | 0.918 | -4.44  | 0.32  | 0.919 |
| PF3D7_1001000 | -2.02  | 0.618 | 0.919 | 1.14   | 0.784 | 0.963 |
| PF3D7_1254200 | -0.801 | 0.539 | 0.918 | 3.16   | 0.252 | 0.919 |
| PF3D7_1430000 | -1.84  | 0.708 | 0.933 | 0.82   | 0.855 | 0.978 |

|               |         |        |       |         |        |       |
|---------------|---------|--------|-------|---------|--------|-------|
| PF3D7_0915700 | -1.89   | 0.514  | 0.918 | 6.25    | 0.204  | 0.919 |
| PF3D7_0624900 | 0.399   | 0.884  | 0.979 | -1.25   | 0.584  | 0.933 |
| PF3D7_1232000 | -0.0345 | 0.944  | 0.99  | 2.43    | 0.185  | 0.919 |
| PF3D7_1247100 | -1.4    | 0.278  | 0.918 | 1.26    | 0.361  | 0.919 |
| PF3D7_0925700 | 2.52    | 0.465  | 0.918 | -4.15   | 0.254  | 0.919 |
| PF3D7_0403300 | -0.856  | 0.629  | 0.919 | 2.41    | 0.304  | 0.919 |
| PF3D7_0916000 | 1.87    | 0.42   | 0.918 | -1.55   | 0.494  | 0.921 |
| PF3D7_1325600 | 1.35    | 0.721  | 0.937 | 0.063   | 0.986  | 0.998 |
| PF3D7_1218600 | -1.31   | 0.717  | 0.935 | 5.41    | 0.197  | 0.919 |
| PF3D7_1102700 | 1.97    | 0.657  | 0.921 | -2.82   | 0.518  | 0.924 |
| PF3D7_0506900 | 1.17    | 0.767  | 0.942 | -2.6    | 0.599  | 0.936 |
| PF3D7_1119200 | -11.4   | 0.192  | 0.918 | 9.68    | 0.253  | 0.919 |
| PF3D7_1025200 | 2.22    | 0.584  | 0.918 | -2.71   | 0.521  | 0.924 |
| PF3D7_1246500 | 1.43    | 0.587  | 0.918 | -0.629  | 0.809  | 0.967 |
| PF3D7_1024700 | 1.79    | 0.626  | 0.919 | -2.77   | 0.508  | 0.924 |
| PF3D7_1008100 | -0.53   | 0.651  | 0.92  | 4.59    | 0.0218 | 0.919 |
| PF13_0316     | 2.83    | 0.427  | 0.918 | -0.0649 | 0.991  | 0.998 |
| PF3D7_1329100 | 1.97    | 0.538  | 0.918 | 1.77    | 0.51   | 0.924 |
| PF3D7_1227500 | -2.89   | 0.0888 | 0.918 | 2.96    | 0.077  | 0.919 |
| PF3D7_1446600 | -4.35   | 0.431  | 0.918 | -0.67   | 0.884  | 0.981 |
| PF3D7_0212000 | 1.8     | 0.672  | 0.923 | 3.7     | 0.449  | 0.919 |
| PF3D7_1036900 | 1.77    | 0.539  | 0.918 | 1.45    | 0.546  | 0.924 |
| PF3D7_1142300 | -7.71   | 0.125  | 0.918 | 5.27    | 0.121  | 0.919 |
| PF3D7_1440400 | 0.207   | 0.805  | 0.953 | 1.27    | 0.412  | 0.919 |
| PF3D7_0521300 | 3.22    | 0.0837 | 0.918 | -0.132  | 0.914  | 0.987 |
| PF3D7_1419500 | -1.52   | 0.54   | 0.918 | 2.16    | 0.557  | 0.927 |
| PF3D7_1365000 | -4.22   | 0.273  | 0.918 | 3.37    | 0.364  | 0.919 |
| PF3D7_0409900 | 4.5     | 0.214  | 0.918 | 7.37    | 0.163  | 0.919 |
| PF3D7_0914100 | 1.55    | 0.759  | 0.941 | -1.75   | 0.715  | 0.957 |
| PF3D7_1227800 | -11.7   | 0.0822 | 0.918 | 24.8    | 0.0924 | 0.919 |
| PF3D7_1472100 | 0.851   | 0.355  | 0.918 | -0.479  | 0.743  | 0.958 |
| PF3D7_1366400 | 1.04    | 0.294  | 0.918 | 0.402   | 0.695  | 0.954 |
| PF3D7_0205400 | 0.769   | 0.837  | 0.961 | -1.76   | 0.748  | 0.959 |
| PF3D7_1035300 | 0.654   | 0.177  | 0.918 | 0.445   | 0.352  | 0.919 |
| PF3D7_1362600 | -1.16   | 0.659  | 0.921 | 0.419   | 0.909  | 0.984 |
| PF3D7_1469700 | 3.57    | 0.385  | 0.918 | -5.04   | 0.236  | 0.919 |
| PF3D7_1318000 | -9.93   | 0.136  | 0.918 | 8.48    | 0.145  | 0.919 |
| PF3D7_0218700 | -1.51   | 0.606  | 0.918 | 0.87    | 0.837  | 0.973 |
| PF3D7_1146300 | -6.35   | 0.328  | 0.918 | 6.54    | 0.263  | 0.919 |
| PF3D7_0721800 | -8.57   | 0.152  | 0.918 | 3.68    | 0.53   | 0.924 |
| PF3D7_1469800 | 0.999   | 0.464  | 0.918 | -0.616  | 0.648  | 0.95  |
| PF3D7_1124100 | -0.552  | 0.523  | 0.918 | 0.722   | 0.411  | 0.919 |
| PF3D7_0323800 | -0.111  | 0.857  | 0.969 | 0.176   | 0.936  | 0.994 |
| PF3D7_1318900 | -12.1   | 0.0764 | 0.918 | 9.7     | 0.133  | 0.919 |
| PF3D7_1022300 | -1.25   | 0.291  | 0.918 | 1.51    | 0.2    | 0.919 |
| PF3D7_0423400 | -2.55   | 0.375  | 0.918 | 2.79    | 0.299  | 0.919 |
| PF3D7_1317500 | 1.04    | 0.516  | 0.918 | -0.182  | 0.914  | 0.986 |



|               |        |        |       |         |        |       |
|---------------|--------|--------|-------|---------|--------|-------|
| PF3D7_0707400 | -1.14  | 0.536  | 0.918 | 1.22    | 0.536  | 0.924 |
| PF3D7_0511300 | 4.21   | 0.171  | 0.918 | -2.84   | 0.31   | 0.919 |
| PF3D7_0610500 | -2.82  | 0.385  | 0.918 | 3.64    | 0.389  | 0.919 |
| PF3D7_0403400 | -0.868 | 0.596  | 0.918 | 0.721   | 0.737  | 0.957 |
| PF3D7_1306300 | 0.318  | 0.701  | 0.931 | 0.99    | 0.267  | 0.919 |
| PF3D7_1239800 | -8.15  | 0.189  | 0.918 | 7.4     | 0.205  | 0.919 |
| PF3D7_1373400 | 2.71   | 0.503  | 0.918 | -0.888  | 0.796  | 0.965 |
| PF3D7_1307800 | -10.7  | 0.154  | 0.918 | 12.8    | 0.127  | 0.919 |
| PF3D7_0800800 | -4.28  | 0.177  | 0.918 | 1.82    | 0.532  | 0.924 |
| PF3D7_0609600 | -1.53  | 0.651  | 0.92  | 1.42    | 0.668  | 0.954 |
| PF3D7_1015900 | -9.43  | 0.0584 | 0.918 | 8.67    | 0.0494 | 0.919 |
| PF3D7_1111400 | -2.16  | 0.294  | 0.918 | 1.94    | 0.387  | 0.919 |
| PF3D7_0420600 | -2.61  | 0.204  | 0.918 | 1.31    | 0.714  | 0.957 |
| PF3D7_1321900 | 0.55   | 0.675  | 0.923 | -1.27   | 0.742  | 0.958 |
| PF3D7_1400300 | -3.18  | 0.378  | 0.918 | 3.42    | 0.344  | 0.919 |
| PF3D7_1007700 | -1.01  | 0.268  | 0.918 | 2.25    | 0.0842 | 0.919 |
| PF3D7_1435600 | 1.43   | 0.51   | 0.918 | -2.06   | 0.409  | 0.919 |
| PF3D7_0903700 | -3.93  | 0.178  | 0.918 | 6.39    | 0.0549 | 0.919 |
| PF3D7_1114900 | -1.76  | 0.364  | 0.918 | -0.502  | 0.826  | 0.97  |
| PF3D7_1213400 | 1.19   | 0.382  | 0.918 | -0.0104 | 0.994  | 0.999 |
| PF3D7_1210000 | 1.12   | 0.64   | 0.919 | -1.3    | 0.659  | 0.95  |
| PF3D7_1406900 | -0.451 | 0.888  | 0.979 | -0.985  | 0.851  | 0.977 |
| PF3D7_0524300 | 1.62   | 0.58   | 0.918 | -3.32   | 0.325  | 0.919 |
| PF3D7_0322700 | -0.994 | 0.744  | 0.94  | 3.12    | 0.324  | 0.919 |
| PF3D7_0919400 | -0.543 | 0.902  | 0.98  | 4.02    | 0.336  | 0.919 |
| PF3D7_1241900 | 1.28   | 0.325  | 0.918 | -0.0459 | 0.981  | 0.998 |
| PF3D7_1025400 | -0.235 | 0.946  | 0.99  | 1.9     | 0.601  | 0.937 |
| PF3D7_1030500 | -0.312 | 0.874  | 0.977 | -0.626  | 0.808  | 0.967 |
| PF3D7_1444900 | 2.18   | 0.563  | 0.918 | -2.62   | 0.507  | 0.924 |
| PF3D7_1443600 | 2.18   | 0.271  | 0.918 | -0.51   | 0.767  | 0.962 |
| PF3D7_1430400 | -0.103 | 0.975  | 0.996 | -0.138  | 0.978  | 0.998 |
| PF3D7_0802300 | -1.61  | 0.399  | 0.918 | 4.02    | 0.319  | 0.919 |
| PF3D7_0310900 | -0.22  | 0.954  | 0.992 | 0.2     | 0.958  | 0.994 |
| PF3D7_1200800 | 0.555  | 0.776  | 0.943 | -2.78   | 0.57   | 0.931 |
| PF3D7_1037000 | 2.2    | 0.355  | 0.918 | -1.57   | 0.517  | 0.924 |
| PF3D7_1010100 | -3.73  | 0.134  | 0.918 | 0.463   | 0.78   | 0.963 |
| PF3D7_1034200 | 4.37   | 0.161  | 0.918 | -2.91   | 0.225  | 0.919 |
| PF3D7_0424800 | -1.5   | 0.316  | 0.918 | 1.29    | 0.402  | 0.919 |
| PF3D7_0703800 | -5.47  | 0.317  | 0.918 | 6.37    | 0.251  | 0.919 |
| PF3D7_1441900 | 0.913  | 0.729  | 0.937 | -1.47   | 0.675  | 0.954 |
| PF3D7_1129300 | 8.8    | 0.057  | 0.918 | -6.95   | 0.116  | 0.919 |
| PF3D7_1028800 | 3.02   | 0.509  | 0.918 | -5.18   | 0.464  | 0.919 |
| PF3D7_1009600 | -1.34  | 0.244  | 0.918 | 0.995   | 0.399  | 0.919 |
| PF3D7_0101200 | -0.442 | 0.767  | 0.942 | 0.514   | 0.812  | 0.968 |
| PF3D7_0203000 | -3.7   | 0.17   | 0.918 | 4.37    | 0.148  | 0.919 |
| PF3D7_0808700 | 8.08   | 0.217  | 0.918 | -5.04   | 0.382  | 0.919 |
| PF3D7_0220000 | 0.229  | 0.924  | 0.985 | -0.309  | 0.898  | 0.983 |

|               |         |       |       |        |        |       |
|---------------|---------|-------|-------|--------|--------|-------|
| PF3D7_1456400 | 1.13    | 0.263 | 0.918 | 0.205  | 0.886  | 0.982 |
| PF3D7_0311200 | 3.14    | 0.516 | 0.918 | -5.8   | 0.396  | 0.919 |
| PF3D7_0904300 | 5.99    | 0.194 | 0.918 | -2.34  | 0.295  | 0.919 |
| PF3D7_1464900 | 0.329   | 0.778 | 0.943 | -1.1   | 0.421  | 0.919 |
| PF3D7_1471100 | 3.32    | 0.346 | 0.918 | -1.66  | 0.605  | 0.939 |
| PF3D7_1364400 | -0.714  | 0.517 | 0.918 | -0.541 | 0.757  | 0.962 |
| PFC0450w      | 1.34    | 0.783 | 0.946 | 7.7    | 0.19   | 0.919 |
| PF3D7_1434800 | -8.13   | 0.217 | 0.918 | -6.19  | 0.198  | 0.919 |
| PF3D7_1452700 | -9.76   | 0.185 | 0.918 | 8.19   | 0.223  | 0.919 |
| PF3D7_1200100 | -2.73   | 0.345 | 0.918 | 4.32   | 0.165  | 0.919 |
| PF3D7_1024400 | -7.2    | 0.132 | 0.918 | 9.94   | 0.0857 | 0.919 |
| PF3D7_0522600 | -0.653  | 0.817 | 0.953 | 4.37   | 0.213  | 0.919 |
| PF3D7_1441200 | 0.0278  | 0.99  | 0.999 | -0.22  | 0.922  | 0.989 |
| PF3D7_0514500 | 30.4    | 0.113 | 0.918 | -8.55  | 0.447  | 0.919 |
| PF3D7_0103400 | 6.64    | 0.167 | 0.918 | -7.77  | 0.114  | 0.919 |
| PF3D7_1340200 | -1.72   | 0.604 | 0.918 | 2.37   | 0.635  | 0.948 |
| PF3D7_0222900 | -2.51   | 0.435 | 0.918 | -0.683 | 0.797  | 0.965 |
| PF3D7_0221000 | 0.242   | 0.925 | 0.985 | 2.6    | 0.46   | 0.919 |
| PF3D7_1458400 | -3.53   | 0.328 | 0.918 | -0.837 | 0.759  | 0.962 |
| PF3D7_0832000 | 4.01    | 0.197 | 0.918 | 3.88   | 0.327  | 0.919 |
| PF3D7_0207700 | 1.08    | 0.751 | 0.94  | 1.52   | 0.615  | 0.942 |
| PF3D7_1431800 | -3.17   | 0.39  | 0.918 | 2.57   | 0.346  | 0.919 |
| PF3D7_0731500 | 0.263   | 0.937 | 0.988 | -0.585 | 0.884  | 0.981 |
| PF3D7_1310800 | 0.132   | 0.753 | 0.94  | -0.132 | 0.814  | 0.968 |
| PF3D7_0920600 | 1.14    | 0.826 | 0.959 | -1.26  | 0.808  | 0.967 |
| PF3D7_1119500 | -0.826  | 0.623 | 0.919 | 3.09   | 0.187  | 0.919 |
| PF3D7_1449400 | 2.46    | 0.392 | 0.918 | -3.81  | 0.29   | 0.919 |
| PF3D7_1002600 | 3.81    | 0.373 | 0.918 | -1.35  | 0.595  | 0.936 |
| PF3D7_1341200 | -2.54   | 0.507 | 0.918 | -1.57  | 0.685  | 0.954 |
| PF3D7_0215600 | 1.71    | 0.635 | 0.919 | 0.917  | 0.639  | 0.95  |
| PF3D7_1138800 | -2.31   | 0.161 | 0.918 | 2.04   | 0.297  | 0.919 |
| PF3D7_0204800 | -1.27   | 0.731 | 0.937 | 1.11   | 0.737  | 0.957 |
| PF3D7_1246800 | -1.42   | 0.674 | 0.923 | 1.21   | 0.748  | 0.959 |
| PF3D7_1472000 | -3.59   | 0.467 | 0.918 | 2.15   | 0.627  | 0.945 |
| PF3D7_1324300 | -2.48   | 0.33  | 0.918 | 2.92   | 0.278  | 0.919 |
| PF3D7_1103900 | 2.03    | 0.564 | 0.918 | -2.78  | 0.573  | 0.933 |
| PF3D7_1448200 | -0.736  | 0.835 | 0.961 | 3.8    | 0.373  | 0.919 |
| PF3D7_0928100 | 0.413   | 0.917 | 0.984 | -2.99  | 0.384  | 0.919 |
| PF3D7_0402600 | 1.84    | 0.624 | 0.919 | -2.15  | 0.581  | 0.933 |
| PF3D7_0701600 | -3.85   | 0.233 | 0.918 | 4.97   | 0.18   | 0.919 |
| PF3D7_0403600 | 1.96    | 0.402 | 0.918 | -0.024 | 0.988  | 0.998 |
| PF3D7_1027600 | -1.4    | 0.847 | 0.964 | 0.809  | 0.907  | 0.984 |
| PF3D7_0708500 | 2.07    | 0.68  | 0.923 | -3.44  | 0.471  | 0.919 |
| PF3D7_1401900 | 3.95    | 0.402 | 0.918 | -3.38  | 0.519  | 0.924 |
| PF3D7_0620200 | -0.0485 | 0.924 | 0.985 | 0.303  | 0.664  | 0.952 |
| PF3D7_1455100 | 2.72    | 0.443 | 0.918 | -4.19  | 0.317  | 0.919 |
| PF3D7_1332400 | -8.83   | 0.11  | 0.918 | 8.01   | 0.138  | 0.919 |

|               |        |        |       |        |        |       |
|---------------|--------|--------|-------|--------|--------|-------|
| PF3D7_1343800 | 4.17   | 0.111  | 0.918 | -0.892 | 0.658  | 0.95  |
| PF3D7_1031600 | -54.7  | 0.332  | 0.918 | 64.7   | 0.322  | 0.919 |
| PF3D7_0808300 | -2.1   | 0.586  | 0.918 | 0.724  | 0.862  | 0.98  |
| PF3D7_1479700 | 6.68   | 0.151  | 0.918 | -7     | 0.127  | 0.919 |
| PF3D7_0301800 | 0.991  | 0.354  | 0.918 | 0.454  | 0.613  | 0.942 |
| PF3D7_1253700 | -8.29  | 0.268  | 0.918 | 6.67   | 0.331  | 0.919 |
| PF3D7_1041000 | -1.55  | 0.288  | 0.918 | 2.17   | 0.167  | 0.919 |
| PF3D7_1249400 | -4.41  | 0.374  | 0.918 | 3.87   | 0.395  | 0.919 |
| PF3D7_1126300 | -1.5   | 0.597  | 0.918 | 0.36   | 0.909  | 0.984 |
| PF3D7_0315500 | -2.1   | 0.446  | 0.918 | 2.21   | 0.581  | 0.933 |
| PF3D7_0809800 | -38.4  | 0.0548 | 0.918 | 36.1   | 0.0513 | 0.919 |
| PF3D7_1218800 | 4.89   | 0.123  | 0.918 | 3.34   | 0.448  | 0.919 |
| PF3D7_1338100 | 1.35   | 0.396  | 0.918 | 0.38   | 0.782  | 0.963 |
| PF3D7_1402300 | 5.42   | 0.215  | 0.918 | -6.81  | 0.213  | 0.919 |
| PF3D7_1404600 | 1.1    | 0.669  | 0.923 | -2.95  | 0.465  | 0.919 |
| PF3D7_1136000 | -1.1   | 0.455  | 0.918 | 1.1    | 0.522  | 0.924 |
| PF3D7_1368900 | -5.43  | 0.213  | 0.918 | 5      | 0.19   | 0.919 |
| PF3D7_1107900 | -5.81  | 0.21   | 0.918 | 7.3    | 0.113  | 0.919 |
| PF3D7_0726100 | -0.954 | 0.32   | 0.918 | 3.65   | 0.0746 | 0.919 |
| PF3D7_1336300 | -3.54  | 0.38   | 0.918 | -0.029 | 0.992  | 0.998 |
| PF3D7_1252600 | -3.64  | 0.411  | 0.918 | 1.13   | 0.785  | 0.963 |
| PF3D7_1118900 | 10.5   | 0.152  | 0.918 | -4.9   | 0.345  | 0.919 |
| PF3D7_1144900 | 2.69   | 0.282  | 0.918 | -1.42  | 0.52   | 0.924 |
| PF3D7_1325800 | 2.78   | 0.353  | 0.918 | -3.05  | 0.302  | 0.919 |
| PF3D7_1350500 | -2.19  | 0.608  | 0.918 | 2.82   | 0.514  | 0.924 |
| PF3D7_0528400 | 0.374  | 0.823  | 0.957 | 0.306  | 0.881  | 0.981 |
| PF3D7_0908800 | 0.0606 | 0.879  | 0.978 | 0.383  | 0.606  | 0.939 |
| PF3D7_1002300 | -6.45  | 0.0803 | 0.918 | 6.53   | 0.0638 | 0.919 |
| PF3D7_1423600 | 1.42   | 0.758  | 0.941 | -1.6   | 0.715  | 0.957 |
| PF3D7_1013500 | -1.15  | 0.761  | 0.941 | 2.88   | 0.469  | 0.919 |
| PF3D7_1021600 | -1.23  | 0.603  | 0.918 | -1.42  | 0.719  | 0.957 |
| PF3D7_1100500 | 0.209  | 0.903  | 0.98  | -0.444 | 0.817  | 0.968 |
| PF3D7_1441800 | 5.21   | 0.246  | 0.918 | -10.9  | 0.0921 | 0.919 |
| PF3D7_1138600 | -0.804 | 0.754  | 0.94  | 1.82   | 0.489  | 0.921 |
| PF3D7_0101600 | 5.26   | 0.161  | 0.918 | -5.13  | 0.213  | 0.919 |
| PF3D7_0731800 | -4.09  | 0.0943 | 0.918 | 6.16   | 0.243  | 0.919 |
| PF3D7_1434100 | -2.42  | 0.661  | 0.921 | 1.09   | 0.817  | 0.968 |
| PF3D7_1458700 | 0.049  | 0.965  | 0.993 | 1.12   | 0.343  | 0.919 |
| PF3D7_0305000 | 2.16   | 0.48   | 0.918 | -0.331 | 0.913  | 0.986 |
| PF3D7_0516700 | -6.02  | 0.173  | 0.918 | 9.09   | 0.0716 | 0.919 |
| PF3D7_1432100 | -3.99  | 0.349  | 0.918 | 5.15   | 0.212  | 0.919 |
| PF3D7_1337100 | -2.33  | 0.402  | 0.918 | 2.37   | 0.462  | 0.919 |
| PF3D7_1459600 | -0.534 | 0.292  | 0.918 | 2.12   | 0.161  | 0.919 |
| PF3D7_0816600 | 1.13   | 0.67   | 0.923 | 1.3    | 0.677  | 0.954 |
| PF3D7_0311100 | 1.87   | 0.293  | 0.918 | -1.17  | 0.543  | 0.924 |
| PF3D7_1104000 | -5.68  | 0.215  | 0.918 | 7.28   | 0.136  | 0.919 |
| PF3D7_1240300 | -4.39  | 0.159  | 0.918 | 4.37   | 0.183  | 0.919 |

|               |         |        |       |         |        |       |
|---------------|---------|--------|-------|---------|--------|-------|
| PF3D7_1367600 | -3.92   | 0.5    | 0.918 | 2.71    | 0.615  | 0.942 |
| PF3D7_1029900 | 0.431   | 0.904  | 0.98  | -1.33   | 0.761  | 0.962 |
| PF3D7_1444500 | 2.64    | 0.4    | 0.918 | -3.36   | 0.328  | 0.919 |
| PF3D7_0803800 | -0.558  | 0.888  | 0.979 | 4.65    | 0.224  | 0.919 |
| PF3D7_0422300 | -8.96   | 0.142  | 0.918 | 12      | 0.0511 | 0.919 |
| PF3D7_1100800 | 1.54    | 0.589  | 0.918 | 0.299   | 0.901  | 0.984 |
| PF3D7_0104800 | 0.467   | 0.88   | 0.978 | -9.06   | 0.119  | 0.919 |
| PF3D7_1038300 | -5.09   | 0.377  | 0.918 | 4.92    | 0.472  | 0.919 |
| PF3D7_1334600 | 1.91    | 0.332  | 0.918 | 0.00374 | 0.999  | 1     |
| PF3D7_1149000 | -0.575  | 0.764  | 0.941 | 2.19    | 0.331  | 0.919 |
| PF3D7_0723000 | -0.34   | 0.719  | 0.937 | 0.503   | 0.59   | 0.935 |
| PF3D7_0220500 | -1.25   | 0.734  | 0.937 | -0.588  | 0.877  | 0.981 |
| PF3D7_0711400 | -8.97   | 0.35   | 0.918 | 7.99    | 0.405  | 0.919 |
| PF3D7_0821200 | -2.14   | 0.417  | 0.918 | 3.7     | 0.463  | 0.919 |
| PF3D7_0201500 | -11.6   | 0.0541 | 0.918 | 11.4    | 0.0626 | 0.919 |
| PF3D7_1203300 | 2.55    | 0.577  | 0.918 | -1.53   | 0.817  | 0.968 |
| PF3D7_0403500 | -2.49   | 0.182  | 0.918 | 3.13    | 0.158  | 0.919 |
| PFL2430c      | -3.69   | 0.13   | 0.918 | 4.84    | 0.0775 | 0.919 |
| PF3D7_1016000 | -7.51   | 0.135  | 0.918 | 6.13    | 0.194  | 0.919 |
| PF3D7_0922600 | 0.464   | 0.873  | 0.976 | 1.15    | 0.726  | 0.957 |
| PF3D7_1358700 | -1.56   | 0.772  | 0.943 | -0.26   | 0.92   | 0.989 |
| PF3D7_0103900 | -0.252  | 0.929  | 0.986 | 0.0441  | 0.988  | 0.998 |
| PF3D7_1123000 | -0.679  | 0.312  | 0.918 | 0.56    | 0.552  | 0.924 |
| PF3D7_1372500 | -2.22   | 0.536  | 0.918 | 2.05    | 0.501  | 0.924 |
| PF3D7_0511600 | -0.405  | 0.62   | 0.919 | 0.821   | 0.317  | 0.919 |
| PF3D7_0210500 | 1.14    | 0.866  | 0.972 | -1.72   | 0.797  | 0.965 |
| PF3D7_1251100 | -1.19   | 0.545  | 0.918 | 1.24    | 0.627  | 0.945 |
| PF3D7_1228900 | -0.0135 | 0.993  | 0.999 | -2.31   | 0.445  | 0.919 |
| PF3D7_1306100 | -0.739  | 0.928  | 0.986 | 0.766   | 0.925  | 0.989 |
| PF3D7_0404100 | 0.122   | 0.866  | 0.972 | -0.311  | 0.816  | 0.968 |
| PF3D7_0620000 | -0.237  | 0.879  | 0.978 | 5.86    | 0.0655 | 0.919 |
| PF14_0141     | -4.48   | 0.238  | 0.918 | 1.87    | 0.617  | 0.942 |
| PF3D7_0827500 | -0.943  | 0.839  | 0.962 | 1.16    | 0.8    | 0.965 |
| PF3D7_1428600 | -2.96   | 0.461  | 0.918 | -2.48   | 0.67   | 0.954 |
| PF3D7_1145900 | 4.34    | 0.462  | 0.918 | -6.22   | 0.285  | 0.919 |
| PF3D7_1445400 | 0.695   | 0.774  | 0.943 | -0.692  | 0.821  | 0.968 |
| PF3D7_1133700 | -0.689  | 0.808  | 0.953 | 0.556   | 0.849  | 0.976 |
| PF3D7_0622000 | -4.59   | 0.242  | 0.918 | 7.48    | 0.138  | 0.919 |
| PF3D7_1241200 | -1.92   | 0.572  | 0.918 | 0.518   | 0.923  | 0.989 |
| PF3D7_0723900 | -0.131  | 0.968  | 0.993 | 1.32    | 0.691  | 0.954 |
| PF3D7_0424400 | 0.827   | 0.609  | 0.919 | -0.785  | 0.622  | 0.942 |
| PF3D7_0115700 | -3.58   | 0.262  | 0.918 | 4.91    | 0.162  | 0.919 |
| PF3D7_1344900 | 1.96    | 0.294  | 0.918 | -0.618  | 0.578  | 0.933 |
| PF3D7_0510300 | -6.23   | 0.372  | 0.918 | 6.01    | 0.398  | 0.919 |
| PF3D7_1451500 | -3.07   | 0.408  | 0.918 | 0.45    | 0.908  | 0.984 |
| PF3D7_1029800 | -5.98   | 0.31   | 0.918 | 3.65    | 0.568  | 0.931 |
| PF3D7_0217200 | -1.69   | 0.516  | 0.918 | 1.56    | 0.716  | 0.957 |

|               |         |        |       |        |        |       |
|---------------|---------|--------|-------|--------|--------|-------|
| PF3D7_0506100 | 2.83    | 0.494  | 0.918 | -3.08  | 0.615  | 0.942 |
| PF3D7_0732600 | -4.59   | 0.364  | 0.918 | 4.36   | 0.378  | 0.919 |
| PF3D7_1131500 | 0.32    | 0.837  | 0.961 | -2.63  | 0.404  | 0.919 |
| PF3D7_0915300 | -0.449  | 0.683  | 0.925 | 0.323  | 0.787  | 0.964 |
| PF3D7_1418900 | 4.12    | 0.245  | 0.918 | -4.62  | 0.213  | 0.919 |
| PF3D7_1451600 | -1.46   | 0.484  | 0.918 | 0.681  | 0.819  | 0.968 |
| PF3D7_1404400 | -1.53   | 0.596  | 0.918 | 1.82   | 0.749  | 0.96  |
| PF3D7_0911900 | -1.67   | 0.302  | 0.918 | 3.35   | 0.118  | 0.919 |
| PF3D7_1125000 | 2.44    | 0.573  | 0.918 | 1.24   | 0.785  | 0.963 |
| PF3D7_1249100 | 3.74    | 0.244  | 0.918 | -2.56  | 0.409  | 0.919 |
| PF3D7_1005400 | 4.09    | 0.191  | 0.918 | -2.1   | 0.551  | 0.924 |
| PF3D7_1021700 | 2.42    | 0.186  | 0.918 | -1.17  | 0.515  | 0.924 |
| PF3D7_0313100 | -9.06   | 0.131  | 0.918 | 10.6   | 0.0896 | 0.919 |
| PF3D7_1018900 | 1.77    | 0.614  | 0.919 | -1.06  | 0.793  | 0.965 |
| PF3D7_1009100 | -3.3    | 0.48   | 0.918 | 4.04   | 0.395  | 0.919 |
| PF3D7_1141600 | -3.97   | 0.317  | 0.918 | 3.21   | 0.373  | 0.919 |
| PF3D7_0809500 | -0.607  | 0.759  | 0.941 | 7.09   | 0.184  | 0.919 |
| PF3D7_1334000 | -1.09   | 0.447  | 0.918 | 1.72   | 0.252  | 0.919 |
| PF3D7_1437900 | 7.7     | 0.0953 | 0.918 | -6.79  | 0.131  | 0.919 |
| PF3D7_1439200 | -0.0484 | 0.935  | 0.987 | 0.371  | 0.591  | 0.935 |
| PF3D7_0508500 | 1.66    | 0.513  | 0.918 | 4.02   | 0.231  | 0.919 |
| PF3D7_0200300 | 0.0816  | 0.972  | 0.995 | -0.169 | 0.948  | 0.994 |
| PF3D7_1461000 | -5.58   | 0.176  | 0.918 | 8.6    | 0.0703 | 0.919 |
| PF3D7_1361900 | -0.231  | 0.88   | 0.978 | 0.155  | 0.954  | 0.994 |
| PF3D7_0405600 | -9.49   | 0.0779 | 0.918 | 9.49   | 0.0814 | 0.919 |
| PF3D7_0314800 | -0.326  | 0.848  | 0.965 | -0.236 | 0.904  | 0.984 |
| PF3D7_0313200 | -0.784  | 0.376  | 0.918 | 3.39   | 0.294  | 0.919 |
| PF3D7_0104100 | -8.3    | 0.0913 | 0.918 | 10.2   | 0.0395 | 0.919 |
| PF3D7_0213500 | -1.46   | 0.567  | 0.918 | 0.934  | 0.767  | 0.962 |
| PF3D7_1450300 | -6.13   | 0.263  | 0.918 | 5.52   | 0.415  | 0.919 |
| PF3D7_0532200 | -0.974  | 0.803  | 0.953 | 0.362  | 0.943  | 0.994 |
| PF3D7_1471500 | 2.34    | 0.606  | 0.918 | 2.79   | 0.527  | 0.924 |
| PF3D7_1427200 | 1.74    | 0.186  | 0.918 | 3.04   | 0.196  | 0.919 |
| PF3D7_0507200 | -0.567  | 0.879  | 0.978 | 0.0948 | 0.98   | 0.998 |
| PF3D7_0722600 | -0.606  | 0.832  | 0.96  | -0.82  | 0.789  | 0.964 |
| PF3D7_0101800 | -1.19   | 0.526  | 0.918 | 5.77   | 0.0672 | 0.919 |
| PF3D7_0405000 | -2.62   | 0.491  | 0.918 | 1.87   | 0.64   | 0.95  |
| PF3D7_0320400 | -2.25   | 0.264  | 0.918 | 2.73   | 0.402  | 0.919 |
| PF3D7_0508300 | -0.639  | 0.743  | 0.94  | 3.7    | 0.216  | 0.919 |
| PF3D7_0803700 | 2.53    | 0.319  | 0.918 | -2.91  | 0.306  | 0.919 |
| PF3D7_0302200 | -2.84   | 0.203  | 0.918 | 2.87   | 0.192  | 0.919 |
| PF3D7_0830300 | -2.57   | 0.32   | 0.918 | 6.3    | 0.154  | 0.919 |
| PF3D7_0218300 | 4.48    | 0.151  | 0.918 | -2.67  | 0.362  | 0.919 |
| PF3D7_1030200 | 6.94    | 0.0809 | 0.918 | -4.83  | 0.192  | 0.919 |
| PF3D7_1324000 | -6.04   | 0.231  | 0.918 | 5.99   | 0.242  | 0.919 |
| PF3D7_0827200 | 1.08    | 0.463  | 0.918 | 4.23   | 0.506  | 0.924 |
| PF3D7_1038900 | -2.17   | 0.559  | 0.918 | 6.06   | 0.206  | 0.919 |

|               |         |        |       |        |        |       |
|---------------|---------|--------|-------|--------|--------|-------|
| PF3D7_1311800 | 2.48    | 0.219  | 0.918 | -0.384 | 0.832  | 0.972 |
| PF3D7_1469500 | 0.262   | 0.851  | 0.966 | 1.51   | 0.373  | 0.919 |
| PF3D7_1429600 | -9.89   | 0.145  | 0.918 | 9.41   | 0.168  | 0.919 |
| PF3D7_0717300 | 103     | 0.287  | 0.918 | -70.2  | 0.283  | 0.919 |
| PF3D7_1129400 | -0.648  | 0.865  | 0.972 | 1.08   | 0.788  | 0.964 |
| PF3D7_1447000 | -5.81   | 0.145  | 0.918 | 4.75   | 0.241  | 0.919 |
| PF3D7_1135600 | -8.91   | 0.258  | 0.918 | 6.73   | 0.26   | 0.919 |
| PF3D7_0314000 | -0.0306 | 0.985  | 0.999 | -1.32  | 0.397  | 0.919 |
| PF3D7_1349000 | 4.3     | 0.421  | 0.918 | 6.4    | 0.168  | 0.919 |
| PF3D7_0901800 | -1.17   | 0.462  | 0.918 | 4.84   | 0.0544 | 0.919 |
| PF3D7_1225300 | -3.47   | 0.164  | 0.918 | 4.14   | 0.107  | 0.919 |
| PF3D7_0212400 | -6.14   | 0.106  | 0.918 | 13.5   | 0.0518 | 0.919 |
| PF3D7_1454500 | -4.48   | 0.274  | 0.918 | 4.12   | 0.302  | 0.919 |
| PF3D7_1346600 | 0.915   | 0.647  | 0.919 | 3.93   | 0.2    | 0.919 |
| PF3D7_0113900 | -3.44   | 0.12   | 0.918 | 6.13   | 0.0495 | 0.919 |
| PF3D7_1230500 | 5.22    | 0.2    | 0.918 | 0.931  | 0.827  | 0.97  |
| PF3D7_0706700 | 5.5     | 0.174  | 0.918 | -3.44  | 0.309  | 0.919 |
| PF3D7_1006200 | 0.963   | 0.758  | 0.941 | -1.28  | 0.686  | 0.954 |
| PF3D7_1131200 | -3.66   | 0.447  | 0.918 | 1.98   | 0.575  | 0.933 |
| PF3D7_1024300 | 3.89    | 0.458  | 0.918 | 0.353  | 0.934  | 0.992 |
| PF3D7_1414800 | -5.68   | 0.143  | 0.918 | 6.34   | 0.149  | 0.919 |
| PF3D7_1334200 | -0.0551 | 0.973  | 0.995 | 0.711  | 0.704  | 0.954 |
| PF3D7_0609100 | -0.689  | 0.614  | 0.919 | 2.27   | 0.179  | 0.919 |
| PF3D7_0723200 | 1.85    | 0.621  | 0.919 | 0.946  | 0.857  | 0.978 |
| PF3D7_0711000 | 0.575   | 0.807  | 0.953 | 2.56   | 0.364  | 0.919 |
| PF3D7_0901300 | -3.96   | 0.21   | 0.918 | 6.16   | 0.127  | 0.919 |
| PF3D7_1361600 | -16.4   | 0.13   | 0.918 | 17     | 0.125  | 0.919 |
| PF3D7_0324500 | 1.54    | 0.548  | 0.918 | -1.52  | 0.594  | 0.936 |
| PF3D7_0414200 | 1.18    | 0.58   | 0.918 | -1.88  | 0.701  | 0.954 |
| PF3D7_1144400 | 1.82    | 0.582  | 0.918 | 6.96   | 0.228  | 0.919 |
| PF3D7_1420300 | -0.254  | 0.71   | 0.933 | 0.502  | 0.546  | 0.924 |
| PF3D7_0515200 | -5.46   | 0.234  | 0.918 | -1.26  | 0.779  | 0.963 |
| PF3D7_0109400 | -5.25   | 0.295  | 0.918 | 5      | 0.358  | 0.919 |
| PF3D7_0704100 | 5.51    | 0.371  | 0.918 | -7.45  | 0.25   | 0.919 |
| PF3D7_0805300 | -8.15   | 0.118  | 0.918 | 13.1   | 0.132  | 0.919 |
| PF3D7_0114100 | 4.79    | 0.397  | 0.918 | -5.58  | 0.327  | 0.919 |
| PF3D7_1150000 | 0.241   | 0.941  | 0.989 | -0.862 | 0.787  | 0.964 |
| PF3D7_0208700 | 0.856   | 0.601  | 0.918 | -0.59  | 0.779  | 0.963 |
| PF3D7_0616700 | -5.17   | 0.129  | 0.918 | 5.81   | 0.0583 | 0.919 |
| PF3D7_1431700 | -0.257  | 0.939  | 0.989 | 0.838  | 0.833  | 0.972 |
| PF3D7_1117500 | -1.07   | 0.724  | 0.937 | 1.61   | 0.532  | 0.924 |
| PF3D7_1413400 | 2.96    | 0.375  | 0.918 | -3.55  | 0.321  | 0.919 |
| PF3D7_0301900 | 0.988   | 0.814  | 0.953 | 1.61   | 0.713  | 0.957 |
| PF3D7_0917900 | 4.84    | 0.317  | 0.918 | -5.6   | 0.229  | 0.919 |
| PF3D7_0218100 | 4.78    | 0.183  | 0.918 | -4.28  | 0.313  | 0.919 |
| PF3D7_0602400 | -17.3   | 0.0618 | 0.918 | 22.5   | 0.0832 | 0.919 |
| PF3D7_0914500 | 2.09    | 0.47   | 0.918 | -1.96  | 0.49   | 0.921 |

|               |         |        |       |         |        |       |
|---------------|---------|--------|-------|---------|--------|-------|
| PF3D7_0314600 | -0.756  | 0.638  | 0.919 | -2.14   | 0.513  | 0.924 |
| PF3D7_0213400 | -0.764  | 0.597  | 0.918 | 2.59    | 0.337  | 0.919 |
| PF3D7_0615100 | 1.66    | 0.316  | 0.918 | 1.69    | 0.225  | 0.919 |
| PF3D7_1475900 | -0.196  | 0.953  | 0.992 | -0.443  | 0.897  | 0.982 |
| PF3D7_1314400 | 1.66    | 0.698  | 0.931 | -0.0735 | 0.986  | 0.998 |
| PF3D7_1030700 | 0.991   | 0.449  | 0.918 | -2.53   | 0.241  | 0.919 |
| PF3D7_1310700 | 8.42    | 0.173  | 0.918 | -7.26   | 0.261  | 0.919 |
| PF3D7_0915900 | -1.98   | 0.599  | 0.918 | -0.669  | 0.761  | 0.962 |
| PF3D7_1406000 | -10.1   | 0.215  | 0.918 | 10.3    | 0.213  | 0.919 |
| PF3D7_1018200 | 2.18    | 0.637  | 0.919 | -0.936  | 0.857  | 0.978 |
| PF3D7_1433500 | 0.11    | 0.901  | 0.98  | -0.115  | 0.922  | 0.989 |
| PF3D7_1150300 | 1.04    | 0.397  | 0.918 | 3.48    | 0.351  | 0.919 |
| PF3D7_0713100 | -9.01   | 0.0532 | 0.918 | 11.1    | 0.0398 | 0.919 |
| PF3D7_1127000 | -12.5   | 0.101  | 0.918 | 15.3    | 0.094  | 0.919 |
| PF3D7_0909000 | -2.32   | 0.447  | 0.918 | 12.2    | 0.136  | 0.919 |
| PFD0660w      | 1.13    | 0.783  | 0.946 | -1.34   | 0.747  | 0.959 |
| PF3D7_0917700 | -2.09   | 0.468  | 0.918 | 3.19    | 0.303  | 0.919 |
| PF3D7_1437800 | 1.59    | 0.764  | 0.941 | -2.7    | 0.537  | 0.924 |
| PF3D7_1232700 | 3.36    | 0.428  | 0.918 | -0.769  | 0.872  | 0.981 |
| PF3D7_0608200 | -0.0771 | 0.981  | 0.997 | -2.85   | 0.618  | 0.942 |
| PF3D7_1359800 | 0.71    | 0.785  | 0.947 | 6.48    | 0.2    | 0.919 |
| PF3D7_1404100 | -6.69   | 0.133  | 0.918 | 4.25    | 0.348  | 0.919 |
| PF3D7_1400600 | -0.84   | 0.587  | 0.918 | 2.49    | 0.133  | 0.919 |
| PF3D7_0923800 | 0.226   | 0.902  | 0.98  | -0.0546 | 0.976  | 0.998 |
| PF3D7_1312100 | 1.11    | 0.703  | 0.931 | 9.17    | 0.134  | 0.919 |
| PF3D7_0529200 | 1.48    | 0.642  | 0.919 | 5.27    | 0.227  | 0.919 |
| PF3D7_1254100 | -7.67   | 0.0913 | 0.918 | 4.84    | 0.192  | 0.919 |
| PF3D7_1445600 | 1.2     | 0.547  | 0.918 | -0.041  | 0.981  | 0.998 |
| PF3D7_0829500 | -5.58   | 0.366  | 0.918 | 8.73    | 0.313  | 0.919 |
| PF3D7_1252900 | 5.03    | 0.114  | 0.918 | 1.01    | 0.687  | 0.954 |
| PF3D7_1027300 | -4.72   | 0.286  | 0.918 | 7.03    | 0.129  | 0.919 |
| PF14_0249     | 4.28    | 0.31   | 0.918 | 0.572   | 0.844  | 0.975 |
| PF3D7_1474800 | -3.99   | 0.279  | 0.918 | 4.09    | 0.278  | 0.919 |
| PF3D7_0624700 | -9.5    | 0.137  | 0.918 | 11.5    | 0.059  | 0.919 |
| PF3D7_1230200 | -6.95   | 0.161  | 0.918 | 8.88    | 0.0803 | 0.919 |
| PF3D7_0729200 | -4.73   | 0.221  | 0.918 | 6.18    | 0.216  | 0.919 |
| PF13_0278     | 1.27    | 0.59   | 0.918 | -0.127  | 0.969  | 0.998 |
| PF3D7_0303900 | 6.28    | 0.261  | 0.918 | -3.93   | 0.411  | 0.919 |
| PF3D7_0223500 | -11.1   | 0.0956 | 0.918 | 10.4    | 0.104  | 0.919 |
| PF3D7_1146500 | -2.93   | 0.345  | 0.918 | 6.32    | 0.0924 | 0.919 |
| PF3D7_1405000 | 1.61    | 0.394  | 0.918 | 6.09    | 0.204  | 0.919 |
| PF3D7_1303800 | -2.07   | 0.38   | 0.918 | 7.18    | 0.0959 | 0.919 |
| PF3D7_1435400 | -3.51   | 0.199  | 0.918 | 4.73    | 0.078  | 0.919 |
| PF3D7_1015100 | -1.38   | 0.669  | 0.923 | 2.33    | 0.513  | 0.924 |
| PF3D7_0419400 | -1.3    | 0.57   | 0.918 | 4.44    | 0.167  | 0.919 |
| PF3D7_0200400 | -15.6   | 0.361  | 0.918 | 20.8    | 0.252  | 0.919 |
| PF3D7_0508900 | 0.702   | 0.584  | 0.918 | -0.338  | 0.782  | 0.963 |

|               |         |       |       |         |       |       |
|---------------|---------|-------|-------|---------|-------|-------|
| PF3D7_0811600 | -1.96   | 0.509 | 0.918 | 1.25    | 0.651 | 0.95  |
| PF3D7_0409700 | 3.02    | 0.377 | 0.918 | -5.04   | 0.317 | 0.919 |
| PF3D7_1248700 | 1.09    | 0.541 | 0.918 | 0.233   | 0.877 | 0.981 |
| PF3D7_1415300 | -5.85   | 0.279 | 0.918 | 8.02    | 0.115 | 0.919 |
| PF3D7_0811200 | 1.63    | 0.644 | 0.919 | 0.362   | 0.922 | 0.989 |
| PF3D7_1230400 | 1.6     | 0.863 | 0.971 | 1.98    | 0.732 | 0.957 |
| PF3D7_1417300 | -0.572  | 0.314 | 0.918 | 1.14    | 0.249 | 0.919 |
| PF3D7_1217200 | -4.28   | 0.217 | 0.918 | 7.99    | 0.084 | 0.919 |
| PF3D7_1144600 | -0.822  | 0.702 | 0.931 | 1.78    | 0.373 | 0.919 |
| PF3D7_1143800 | -0.0126 | 0.997 | 0.999 | 1.5     | 0.647 | 0.95  |
| PF3D7_1453400 | 1.1     | 0.565 | 0.918 | -1.88   | 0.487 | 0.921 |
| PF3D7_0824400 | -2.95   | 0.339 | 0.918 | 4.67    | 0.189 | 0.919 |
| PF3D7_0509600 | -0.104  | 0.955 | 0.992 | -0.0841 | 0.96  | 0.995 |
| PF11_0191     | 1.44    | 0.597 | 0.918 | -0.263  | 0.93  | 0.991 |
| PF3D7_1333500 | 2.84    | 0.253 | 0.918 | -1.66   | 0.472 | 0.919 |
| PF3D7_1369600 | -2.5    | 0.46  | 0.918 | 0.704   | 0.867 | 0.981 |
| PF3D7_0726700 | 2.99    | 0.495 | 0.918 | -2.06   | 0.558 | 0.927 |
| PF3D7_1327500 | -7.59   | 0.246 | 0.918 | 7.65    | 0.234 | 0.919 |
| PF3D7_1136300 | 2.85    | 0.358 | 0.918 | -0.562  | 0.832 | 0.972 |
| PF3D7_1202600 | -0.949  | 0.534 | 0.918 | 2.51    | 0.131 | 0.919 |
| PF3D7_1300200 | -2.56   | 0.36  | 0.918 | 2.69    | 0.318 | 0.919 |
| PF3D7_0926000 | 3.72    | 0.421 | 0.918 | -3.75   | 0.398 | 0.919 |
| PF3D7_1436300 | 0.0315  | 0.944 | 0.989 | 0.811   | 0.465 | 0.919 |
| PF3D7_1107300 | -1.16   | 0.375 | 0.918 | -0.0332 | 0.993 | 0.998 |
| PF3D7_0218000 | 2.38    | 0.404 | 0.918 | 3.68    | 0.369 | 0.919 |
| PF3D7_1017200 | -7.34   | 0.127 | 0.918 | 2.76    | 0.468 | 0.919 |
| PF3D7_1231000 | 13.8    | 0.125 | 0.918 | -2.76   | 0.548 | 0.924 |
| PF3D7_1342200 | -4.57   | 0.378 | 0.918 | 2.7     | 0.541 | 0.924 |
| PFI0570w      | 5.64    | 0.177 | 0.918 | -2.17   | 0.492 | 0.921 |
| PF3D7_0729400 | -1.33   | 0.498 | 0.918 | 2.94    | 0.477 | 0.919 |
| PF3D7_0408900 | 4.76    | 0.242 | 0.918 | -1.25   | 0.727 | 0.957 |
| PF3D7_1300300 | 0.581   | 0.671 | 0.923 | 1.96    | 0.156 | 0.919 |
| PF3D7_1214100 | 0.822   | 0.765 | 0.941 | 3.06    | 0.339 | 0.919 |
| PF3D7_0927000 | 6.18    | 0.171 | 0.918 | -5.59   | 0.194 | 0.919 |
| PF3D7_0833200 | -0.135  | 0.951 | 0.992 | 0.673   | 0.821 | 0.968 |
| PF3D7_0937700 | 6.64    | 0.193 | 0.918 | -5.32   | 0.229 | 0.919 |
| PF3D7_1027000 | 0.108   | 0.875 | 0.977 | -0.504  | 0.655 | 0.95  |
| PF3D7_0512100 | 0.438   | 0.844 | 0.963 | -0.974  | 0.658 | 0.95  |
| PF3D7_1361000 | 0.474   | 0.796 | 0.952 | 1.81    | 0.354 | 0.919 |
| PF3D7_0627000 | -10.5   | 0.145 | 0.918 | 7.89    | 0.184 | 0.919 |
| PF3D7_0703000 | 5.39    | 0.195 | 0.918 | -4.82   | 0.255 | 0.919 |
| PF3D7_1462200 | -2.79   | 0.66  | 0.921 | 2.32    | 0.7   | 0.954 |
| PF11_0344     | -2.67   | 0.519 | 0.918 | 3.54    | 0.392 | 0.919 |
| PF3D7_1442900 | 6.1     | 0.153 | 0.918 | -3.86   | 0.253 | 0.919 |
| PF3D7_1470800 | 6.3     | 0.243 | 0.918 | -7.36   | 0.188 | 0.919 |
| PF3D7_0713500 | 1.62    | 0.611 | 0.919 | 1.05    | 0.794 | 0.965 |
| PF3D7_0604000 | 0.121   | 0.922 | 0.985 | 0.183   | 0.88  | 0.981 |



|               |          |        |       |        |        |       |
|---------------|----------|--------|-------|--------|--------|-------|
| PF3D7_0630900 | 0.776    | 0.788  | 0.948 | -2.07  | 0.525  | 0.924 |
| PF3D7_1220800 | -13.8    | 0.145  | 0.918 | 16.8   | 0.101  | 0.919 |
| PF3D7_0630600 | -0.159   | 0.757  | 0.941 | -0.156 | 0.849  | 0.976 |
| PF3D7_1344400 | 2.1      | 0.618  | 0.919 | -2.18  | 0.62   | 0.942 |
| PF3D7_1355500 | -1.36    | 0.264  | 0.918 | 1.06   | 0.36   | 0.919 |
| PF3D7_1210700 | -5.21    | 0.25   | 0.918 | 6.28   | 0.212  | 0.919 |
| PF3D7_0808200 | -1.29    | 0.2    | 0.918 | 1.44   | 0.123  | 0.919 |
| PF3D7_0619300 | 1.99     | 0.359  | 0.918 | 0.53   | 0.853  | 0.977 |
| PF3D7_1408400 | -18.1    | 0.113  | 0.918 | 19.8   | 0.0775 | 0.919 |
| PF3D7_1412200 | 3.09     | 0.223  | 0.918 | 7.77   | 0.251  | 0.919 |
| PF3D7_1357000 | -0.258   | 0.925  | 0.985 | 0.413  | 0.929  | 0.991 |
| PF3D7_0411700 | 1.08     | 0.656  | 0.921 | 0.612  | 0.813  | 0.968 |
| PF3D7_1304200 | -0.321   | 0.912  | 0.983 | 1.83   | 0.508  | 0.924 |
| PF3D7_0934600 | -0.632   | 0.756  | 0.941 | 5.05   | 0.221  | 0.919 |
| PF3D7_0823700 | -1.61    | 0.568  | 0.918 | 1.55   | 0.699  | 0.954 |
| PF3D7_1202000 | -0.187   | 0.847  | 0.964 | 0.181  | 0.901  | 0.984 |
| PF3D7_1334800 | 1.01     | 0.475  | 0.918 | -0.638 | 0.632  | 0.947 |
| PF3D7_1013400 | -0.182   | 0.922  | 0.985 | 1.27   | 0.521  | 0.924 |
| PF3D7_0316500 | -9.56    | 0.0596 | 0.918 | 7.58   | 0.0811 | 0.919 |
| PF3D7_0726500 | -0.00707 | 0.995  | 0.999 | 0.5    | 0.759  | 0.962 |
| PF3D7_1404300 | -2.81    | 0.398  | 0.918 | 6.34   | 0.144  | 0.919 |
| PF3D7_0115200 | -1.72    | 0.735  | 0.937 | 2.16   | 0.658  | 0.95  |
| PF3D7_1131400 | 3.35     | 0.314  | 0.918 | -3.53  | 0.393  | 0.919 |
| PF3D7_0423000 | 3.17     | 0.41   | 0.918 | -4.22  | 0.288  | 0.919 |
| PF3D7_1453900 | -0.0798  | 0.862  | 0.971 | 3.46   | 0.162  | 0.919 |
| PF3D7_0501000 | 0.34     | 0.881  | 0.978 | 0.466  | 0.877  | 0.981 |
| PF3D7_1314800 | 2.67     | 0.4    | 0.918 | -1.01  | 0.655  | 0.95  |
| PF3D7_0922400 | 0.633    | 0.816  | 0.953 | -0.116 | 0.963  | 0.996 |
| PF3D7_1114000 | -3.11    | 0.647  | 0.919 | 0.131  | 0.975  | 0.998 |
| PF3D7_0412400 | -1.67    | 0.478  | 0.918 | 1.06   | 0.638  | 0.95  |
| PF3D7_1218300 | 5.68     | 0.253  | 0.918 | -5.24  | 0.219  | 0.919 |
| PF3D7_0630300 | -0.353   | 0.761  | 0.941 | -0.505 | 0.767  | 0.962 |
| PF3D7_0805100 | -0.838   | 0.604  | 0.918 | 3.36   | 0.11   | 0.919 |
| PF3D7_1465700 | 0.398    | 0.731  | 0.937 | 2.98   | 0.332  | 0.919 |
| PF3D7_1342100 | -1.34    | 0.688  | 0.927 | 3.11   | 0.322  | 0.919 |
| PF3D7_1015600 | -1.49    | 0.511  | 0.918 | 0.902  | 0.735  | 0.957 |
| PF3D7_1016500 | 1.34     | 0.217  | 0.918 | -0.153 | 0.907  | 0.984 |
| PF3D7_1246400 | -0.121   | 0.96   | 0.992 | -0.422 | 0.856  | 0.978 |
| PF3D7_1110700 | -2.83    | 0.557  | 0.918 | 5.59   | 0.275  | 0.919 |
| PF3D7_0935600 | -3.77    | 0.0798 | 0.918 | 3.19   | 0.0949 | 0.919 |
| PF3D7_0421300 | 2.38     | 0.437  | 0.918 | -0.571 | 0.894  | 0.982 |
| PF3D7_1024100 | 4.77     | 0.156  | 0.918 | -0.388 | 0.895  | 0.982 |
| PF3D7_0425900 | 3.86     | 0.199  | 0.918 | -3.26  | 0.249  | 0.919 |
| PF3D7_0606300 | -0.715   | 0.881  | 0.978 | 0.997  | 0.829  | 0.971 |
| MAL8P1.143    | -0.305   | 0.692  | 0.928 | 0.58   | 0.511  | 0.924 |
| PF3D7_0502500 | -4.58    | 0.172  | 0.918 | 4.95   | 0.161  | 0.919 |
| PF3D7_1214700 | -11.4    | 0.198  | 0.918 | 13.5   | 0.185  | 0.919 |

|               |        |        |       |        |        |       |
|---------------|--------|--------|-------|--------|--------|-------|
| PF3D7_0504500 | 19.1   | 0.0997 | 0.918 | -18.9  | 0.0883 | 0.919 |
| PF3D7_1241500 | 1.53   | 0.671  | 0.923 | -2.27  | 0.527  | 0.924 |
| PF3D7_0905200 | -2.12  | 0.674  | 0.923 | 1.58   | 0.768  | 0.962 |
| PF3D7_0219200 | -1.02  | 0.614  | 0.919 | 0.0882 | 0.973  | 0.998 |
| PF3D7_1242500 | -3.08  | 0.263  | 0.918 | 2.27   | 0.428  | 0.919 |
| PF3D7_1353000 | -10.4  | 0.0866 | 0.918 | 8.39   | 0.12   | 0.919 |
| PF3D7_0404000 | -5.81  | 0.502  | 0.918 | 4.89   | 0.517  | 0.924 |
| PF11_0106     | 11.5   | 0.189  | 0.918 | -4.12  | 0.538  | 0.924 |
| PF3D7_1403700 | -10.1  | 0.135  | 0.918 | 16.9   | 0.0925 | 0.919 |
| PF3D7_1358900 | -1.25  | 0.56   | 0.918 | 1.26   | 0.575  | 0.933 |
| PF3D7_0314300 | 5.19   | 0.101  | 0.918 | -1.32  | 0.537  | 0.924 |
| PF3D7_1313700 | 0.669  | 0.881  | 0.978 | -1.4   | 0.767  | 0.962 |
| PF3D7_1311000 | -6.42  | 0.232  | 0.918 | 7.18   | 0.139  | 0.919 |
| PF3D7_1403000 | 0.814  | 0.616  | 0.919 | -1.55  | 0.699  | 0.954 |
| PF3D7_0718300 | 4.73   | 0.346  | 0.918 | -0.673 | 0.878  | 0.981 |
| PF3D7_0308500 | 3.77   | 0.371  | 0.918 | -4.8   | 0.321  | 0.919 |
| PF3D7_1327000 | -0.745 | 0.583  | 0.918 | 0.76   | 0.654  | 0.95  |
| PF3D7_0211300 | -4.82  | 0.342  | 0.918 | 4.61   | 0.325  | 0.919 |
| PF3D7_1021500 | -1.83  | 0.335  | 0.918 | 1.84   | 0.337  | 0.919 |
| PF3D7_1353600 | 0.786  | 0.776  | 0.943 | 1.56   | 0.579  | 0.933 |
| PF3D7_1139800 | 0.372  | 0.885  | 0.979 | -1.56  | 0.485  | 0.92  |
| PF3D7_0906400 | -2.09  | 0.441  | 0.918 | 1.18   | 0.696  | 0.954 |
| PF13_0172     | -3.03  | 0.438  | 0.918 | 4.4    | 0.329  | 0.919 |
| PF3D7_0910700 | -0.618 | 0.736  | 0.937 | 0.599  | 0.757  | 0.962 |
| PF3D7_1474200 | 1.04   | 0.404  | 0.918 | 2.3    | 0.475  | 0.919 |
| PF3D7_0622100 | 9.28   | 0.057  | 0.918 | -2.13  | 0.498  | 0.923 |
| PF3D7_0822500 | 1.61   | 0.439  | 0.918 | -0.349 | 0.846  | 0.975 |
| PF3D7_1457300 | 1.17   | 0.359  | 0.918 | -1.33  | 0.691  | 0.954 |
| PF3D7_1317200 | -0.413 | 0.383  | 0.918 | 0.122  | 0.866  | 0.981 |
| PF3D7_0932400 | 0.945  | 0.468  | 0.918 | 5.39   | 0.244  | 0.919 |
| PF3D7_1246000 | -0.309 | 0.944  | 0.989 | 2.73   | 0.53   | 0.924 |
| PF3D7_0626800 | -3.84  | 0.598  | 0.918 | 3.31   | 0.607  | 0.939 |
| PF3D7_0303300 | -14.3  | 0.0551 | 0.918 | -0.177 | 0.974  | 0.998 |
| PF3D7_0301500 | -2.52  | 0.365  | 0.918 | 4.99   | 0.0799 | 0.919 |
| PF3D7_1129200 | -8.52  | 0.197  | 0.918 | 11.6   | 0.104  | 0.919 |
| PF3D7_1003500 | 2.01   | 0.396  | 0.918 | -0.375 | 0.891  | 0.982 |
| PF3D7_0520000 | -4.44  | 0.207  | 0.918 | 6.34   | 0.144  | 0.919 |
| PF3D7_0214800 | 0.899  | 0.857  | 0.969 | -1.75  | 0.784  | 0.963 |
| PF3D7_0921800 | 7.31   | 0.15   | 0.918 | -11    | 0.0599 | 0.919 |
| PF3D7_0409000 | 4.98   | 0.109  | 0.918 | -3.41  | 0.212  | 0.919 |
| PF3D7_0404400 | -8.65  | 0.0382 | 0.918 | 3.4    | 0.422  | 0.919 |
| PF3D7_1314300 | -1.19  | 0.778  | 0.943 | 0.822  | 0.854  | 0.977 |
| PF3D7_1326200 | 4.88   | 0.236  | 0.918 | -0.501 | 0.874  | 0.981 |
| PF3D7_0525000 | -4.03  | 0.12   | 0.918 | 2.59   | 0.355  | 0.919 |
| PF3D7_0204000 | -4.18  | 0.223  | 0.918 | 6.57   | 0.161  | 0.919 |
| PF3D7_0603700 | -0.775 | 0.804  | 0.953 | 2.3    | 0.469  | 0.919 |
| PF3D7_1436400 | -1.3   | 0.354  | 0.918 | 3.35   | 0.127  | 0.919 |

|               |        |        |       |         |        |       |
|---------------|--------|--------|-------|---------|--------|-------|
| PF3D7_1476600 | -1.51  | 0.514  | 0.918 | 2.01    | 0.392  | 0.919 |
| PF3D7_0936600 | -2.75  | 0.139  | 0.918 | 2.86    | 0.102  | 0.919 |
| PF3D7_1445200 | 0.194  | 0.915  | 0.984 | -1.02   | 0.535  | 0.924 |
| PF3D7_1442300 | 1.18   | 0.357  | 0.918 | 0.551   | 0.732  | 0.957 |
| PF3D7_1440300 | -1.12  | 0.609  | 0.919 | 6.57    | 0.211  | 0.919 |
| PF3D7_1113500 | 4.49   | 0.288  | 0.918 | -2.29   | 0.405  | 0.919 |
| PF3D7_1128900 | -3.24  | 0.463  | 0.918 | 8.74    | 0.137  | 0.919 |
| PF3D7_1453800 | -3.36  | 0.215  | 0.918 | 2.96    | 0.348  | 0.919 |
| PF3D7_1003800 | -1.61  | 0.523  | 0.918 | 2.31    | 0.342  | 0.919 |
| PF3D7_0312300 | 2.92   | 0.524  | 0.918 | 2.08    | 0.611  | 0.942 |
| PF3D7_1306800 | 6.77   | 0.256  | 0.918 | -6.96   | 0.211  | 0.919 |
| PF3D7_0307900 | -4.17  | 0.26   | 0.918 | 0.154   | 0.976  | 0.998 |
| PF3D7_0216300 | -2.86  | 0.382  | 0.918 | -1.02   | 0.793  | 0.965 |
| PF3D7_1127100 | 2.21   | 0.527  | 0.918 | -3.04   | 0.447  | 0.919 |
| PFB0490c      | 0.861  | 0.776  | 0.943 | 1.85    | 0.701  | 0.954 |
| PF3D7_1438600 | -1.76  | 0.711  | 0.933 | -2.15   | 0.64   | 0.95  |
| PF3D7_1030900 | -1.43  | 0.693  | 0.928 | 3.97    | 0.401  | 0.919 |
| PF3D7_1312200 | -3.57  | 0.212  | 0.918 | 7       | 0.169  | 0.919 |
| PF3D7_1354400 | 3.55   | 0.311  | 0.918 | -1.62   | 0.648  | 0.95  |
| PF3D7_1348500 | 3.62   | 0.531  | 0.918 | -4.05   | 0.485  | 0.92  |
| PF3D7_0503100 | -13.1  | 0.054  | 0.918 | 11.2    | 0.0422 | 0.919 |
| PF3D7_0307300 | 3.37   | 0.268  | 0.918 | -3.6    | 0.283  | 0.919 |
| PF3D7_0416800 | -4.23  | 0.195  | 0.918 | 5.99    | 0.157  | 0.919 |
| PF3D7_1130800 | 2.34   | 0.408  | 0.918 | -0.0999 | 0.973  | 0.998 |
| PF3D7_1231500 | 3.61   | 0.261  | 0.918 | -1.81   | 0.424  | 0.919 |
| PF3D7_0719900 | -3.67  | 0.197  | 0.918 | 7.48    | 0.139  | 0.919 |
| PF3D7_0322900 | -3.39  | 0.39   | 0.918 | 3.7     | 0.461  | 0.919 |
| PF3D7_0928900 | -3.01  | 0.476  | 0.918 | -1.43   | 0.325  | 0.919 |
| PF3D7_0925400 | -1.06  | 0.705  | 0.932 | 1.71    | 0.538  | 0.924 |
| PF3D7_0531400 | 4.55   | 0.237  | 0.918 | -4.82   | 0.203  | 0.919 |
| PF3D7_1467000 | -2.93  | 0.461  | 0.918 | -1.29   | 0.811  | 0.968 |
| PF3D7_0606200 | 0.615  | 0.701  | 0.931 | -0.469  | 0.731  | 0.957 |
| PF3D7_1401400 | 4.49   | 0.451  | 0.918 | 2.69    | 0.61   | 0.941 |
| PF3D7_1129800 | 1.94   | 0.484  | 0.918 | 1.22    | 0.687  | 0.954 |
| PF3D7_0110500 | -1.92  | 0.283  | 0.918 | 6.5     | 0.102  | 0.919 |
| PF3D7_0209500 | -1.49  | 0.354  | 0.918 | 2.05    | 0.245  | 0.919 |
| PF3D7_1005800 | 3.27   | 0.515  | 0.918 | 0.0462  | 0.993  | 0.998 |
| PF3D7_1304900 | -9.61  | 0.245  | 0.918 | 9.66    | 0.247  | 0.919 |
| PF3D7_1040200 | -1.74  | 0.433  | 0.918 | 3.04    | 0.184  | 0.919 |
| PF3D7_0810000 | 4.02   | 0.307  | 0.918 | -3.72   | 0.526  | 0.924 |
| PF3D7_0724500 | 2.56   | 0.573  | 0.918 | -0.909  | 0.893  | 0.982 |
| PF3D7_1464700 | -2.95  | 0.607  | 0.918 | 9.92    | 0.137  | 0.919 |
| PF14_0540     | -0.258 | 0.508  | 0.918 | 0.424   | 0.52   | 0.924 |
| PF3D7_0417600 | -15    | 0.0733 | 0.918 | 8.89    | 0.138  | 0.919 |
| PF3D7_0725300 | 16.4   | 0.0795 | 0.918 | -14.5   | 0.0722 | 0.919 |
| PF3D7_1454300 | 1.84   | 0.662  | 0.921 | -1.85   | 0.642  | 0.95  |
| PF3D7_1406600 | -0.27  | 0.705  | 0.932 | -0.205  | 0.911  | 0.986 |

|               |         |        |       |        |        |       |
|---------------|---------|--------|-------|--------|--------|-------|
| PF3D7_1008800 | 0.659   | 0.855  | 0.967 | -3.36  | 0.441  | 0.919 |
| PF3D7_0402300 | 1.51    | 0.571  | 0.918 | -1.5   | 0.578  | 0.933 |
| PF3D7_0300600 | 1.73    | 0.542  | 0.918 | -0.872 | 0.764  | 0.962 |
| PF3D7_0107200 | 0.55    | 0.888  | 0.979 | 3.5    | 0.507  | 0.924 |
| PF3D7_1351800 | -0.962  | 0.428  | 0.918 | 2.51   | 0.0861 | 0.919 |
| PF3D7_0104700 | -5.92   | 0.253  | 0.918 | 13.5   | 0.104  | 0.919 |
| PF3D7_1471000 | -3.73   | 0.212  | 0.918 | 2.07   | 0.552  | 0.924 |
| PF3D7_1324200 | -3.36   | 0.321  | 0.918 | 0.513  | 0.873  | 0.981 |
| PF3D7_1363600 | -2.69   | 0.514  | 0.918 | 4.25   | 0.294  | 0.919 |
| PF13_0305     | -13.7   | 0.126  | 0.918 | 11.5   | 0.109  | 0.919 |
| PF3D7_0705600 | -1.8    | 0.466  | 0.918 | 2.29   | 0.581  | 0.933 |
| PF3D7_0217800 | -7.85   | 0.114  | 0.918 | 6.92   | 0.172  | 0.919 |
| PF3D7_0416700 | -6.93   | 0.308  | 0.918 | 3.24   | 0.542  | 0.924 |
| PF3D7_1121400 | 0.659   | 0.762  | 0.941 | -0.47  | 0.823  | 0.969 |
| PF14_0717     | 0.0893  | 0.965  | 0.993 | 0.587  | 0.845  | 0.975 |
| PF3D7_0701000 | -1.24   | 0.677  | 0.923 | 1.93   | 0.489  | 0.921 |
| PF3D7_0815200 | -1.8    | 0.519  | 0.918 | 2.12   | 0.558  | 0.927 |
| PF3D7_0507400 | -15.4   | 0.101  | 0.918 | 15.9   | 0.0962 | 0.919 |
| PF3D7_0701800 | 0.742   | 0.563  | 0.918 | -0.826 | 0.59   | 0.935 |
| PF3D7_1219300 | 1.48    | 0.298  | 0.918 | -4     | 0.225  | 0.919 |
| mal_mito_3    | 13.3    | 0.11   | 0.918 | -0.232 | 0.971  | 0.998 |
| PF3D7_0420000 | 1.36    | 0.512  | 0.918 | 1.95   | 0.376  | 0.919 |
| PF3D7_1320600 | -1.3    | 0.483  | 0.918 | 1.92   | 0.495  | 0.921 |
| PF3D7_0905500 | -6.14   | 0.267  | 0.918 | 9.12   | 0.0911 | 0.919 |
| PF3D7_1031400 | -0.793  | 0.575  | 0.918 | 1.97   | 0.294  | 0.919 |
| PF3D7_0812600 | 6.55    | 0.135  | 0.918 | -5.63  | 0.219  | 0.919 |
| PF3D7_0814400 | 0.341   | 0.736  | 0.937 | -0.117 | 0.914  | 0.987 |
| PF3D7_1211100 | 0.993   | 0.553  | 0.918 | 0.682  | 0.817  | 0.968 |
| PF3D7_1226000 | 5.27    | 0.107  | 0.918 | -2.37  | 0.457  | 0.919 |
| PF3D7_1222600 | -0.102  | 0.814  | 0.953 | 0.35   | 0.586  | 0.933 |
| PF3D7_1237700 | 2.37    | 0.348  | 0.918 | 0.802  | 0.7    | 0.954 |
| PF3D7_0603800 | -0.757  | 0.526  | 0.918 | 1.74   | 0.225  | 0.919 |
| PF3D7_1020300 | -4.48   | 0.143  | 0.918 | 5.34   | 0.072  | 0.919 |
| PF3D7_0104600 | -6.36   | 0.161  | 0.918 | 4.1    | 0.266  | 0.919 |
| PF3D7_0318600 | 0.953   | 0.412  | 0.918 | 1.55   | 0.346  | 0.919 |
| PF3D7_1134700 | -4.46   | 0.0485 | 0.918 | 5.69   | 0.0396 | 0.919 |
| PF3D7_0935000 | -14.6   | 0.266  | 0.918 | 19.9   | 0.169  | 0.919 |
| PFE0605c      | -2.43   | 0.314  | 0.918 | 2.75   | 0.432  | 0.919 |
| PF3D7_1230900 | -1.77   | 0.637  | 0.919 | 0.164  | 0.97   | 0.998 |
| PF3D7_0706000 | 3.77    | 0.278  | 0.918 | -4.13  | 0.287  | 0.919 |
| PF3D7_0222600 | -3.4    | 0.484  | 0.918 | 3.6    | 0.436  | 0.919 |
| PF3D7_0211200 | 3       | 0.496  | 0.918 | 2.8    | 0.609  | 0.94  |
| PF3D7_1416300 | 3.29    | 0.373  | 0.918 | -3.37  | 0.42   | 0.919 |
| PF3D7_1329500 | -0.0609 | 0.889  | 0.979 | 0.0965 | 0.788  | 0.964 |
| PF3D7_0906900 | -0.994  | 0.513  | 0.918 | -0.405 | 0.876  | 0.981 |
| PF3D7_1148000 | 2.66    | 0.409  | 0.918 | -0.888 | 0.805  | 0.966 |
| PF3D7_1034100 | -5.28   | 0.228  | 0.918 | 5.37   | 0.229  | 0.919 |

|               |         |        |       |         |        |       |
|---------------|---------|--------|-------|---------|--------|-------|
| PF3D7_0419100 | -2.92   | 0.188  | 0.918 | 7.98    | 0.144  | 0.919 |
| PF3D7_1253200 | 0.747   | 0.59   | 0.918 | -0.165  | 0.922  | 0.989 |
| PF3D7_1422600 | 1.56    | 0.594  | 0.918 | -0.137  | 0.946  | 0.994 |
| PF3D7_1242000 | -1.82   | 0.492  | 0.918 | 1.72    | 0.486  | 0.921 |
| PF3D7_0907900 | 2.38    | 0.503  | 0.918 | -1.01   | 0.679  | 0.954 |
| PF3D7_0727400 | 1.47    | 0.714  | 0.934 | -2.88   | 0.619  | 0.942 |
| PF3D7_1242300 | 0.826   | 0.535  | 0.918 | -0.0819 | 0.95   | 0.994 |
| PF3D7_1121600 | 0.355   | 0.743  | 0.94  | 0.704   | 0.66   | 0.95  |
| PF3D7_1473100 | 0.175   | 0.664  | 0.922 | 1.26    | 0.162  | 0.919 |
| PF3D7_0707900 | -0.826  | 0.619  | 0.919 | -0.689  | 0.849  | 0.976 |
| PF3D7_1415700 | 0.221   | 0.943  | 0.989 | 4.26    | 0.238  | 0.919 |
| PF3D7_0918700 | -3.44   | 0.196  | 0.918 | -0.173  | 0.963  | 0.996 |
| PF3D7_1140100 | 0.0748  | 0.96   | 0.992 | 0.024   | 0.989  | 0.998 |
| PF3D7_0530400 | 3.5     | 0.301  | 0.918 | -4.73   | 0.283  | 0.919 |
| PF3D7_1314000 | -0.475  | 0.532  | 0.918 | 0.125   | 0.926  | 0.989 |
| PF14_0196     | 6.58    | 0.114  | 0.918 | -3.01   | 0.284  | 0.919 |
| PF11_0192     | -8.65   | 0.0776 | 0.918 | 7.6     | 0.122  | 0.919 |
| PF3D7_1477400 | -0.659  | 0.872  | 0.976 | 2       | 0.61   | 0.941 |
| PF3D7_1001700 | 3.14    | 0.266  | 0.918 | -2.9    | 0.334  | 0.919 |
| PF3D7_1345800 | -0.473  | 0.911  | 0.983 | 3.17    | 0.52   | 0.924 |
| PF3D7_0501200 | -0.21   | 0.88   | 0.978 | 0.601   | 0.7    | 0.954 |
| PF3D7_0933000 | -1.37   | 0.594  | 0.918 | 0.229   | 0.912  | 0.986 |
| PF3D7_0601700 | -4.63   | 0.112  | 0.918 | 2.17    | 0.362  | 0.919 |
| PF3D7_1001900 | 1.23    | 0.819  | 0.955 | 2.62    | 0.538  | 0.924 |
| PF3D7_1435200 | 1.31    | 0.589  | 0.918 | -3.63   | 0.493  | 0.921 |
| PF3D7_0913500 | 3.21    | 0.393  | 0.918 | -1.76   | 0.659  | 0.95  |
| PF3D7_1148800 | -5.25   | 0.334  | 0.918 | 5.31    | 0.397  | 0.919 |
| PF3D7_1440200 | -2.49   | 0.355  | 0.918 | 3.24    | 0.242  | 0.919 |
| PF3D7_0715800 | -0.196  | 0.751  | 0.94  | 1.54    | 0.397  | 0.919 |
| PF3D7_1448400 | -3.4    | 0.447  | 0.918 | 4.59    | 0.29   | 0.919 |
| PF3D7_1352600 | -4.2    | 0.501  | 0.918 | 3.66    | 0.498  | 0.923 |
| PF3D7_0608700 | -10.9   | 0.131  | 0.918 | 16.8    | 0.0605 | 0.919 |
| PF3D7_1026600 | -0.01   | 0.988  | 0.999 | 0.00337 | 0.998  | 1     |
| PF3D7_1144700 | 0.322   | 0.938  | 0.989 | 1.52    | 0.707  | 0.954 |
| PF3D7_1208300 | 5.79    | 0.0852 | 0.918 | -5.56   | 0.112  | 0.919 |
| PF3D7_1143600 | -0.279  | 0.92   | 0.985 | 0.0523  | 0.983  | 0.998 |
| PF3D7_1364300 | -0.533  | 0.896  | 0.98  | 1.18    | 0.77   | 0.963 |
| PF3D7_0902100 | -5.95   | 0.362  | 0.918 | 1.56    | 0.735  | 0.957 |
| PF3D7_0307600 | -4.17   | 0.247  | 0.918 | 3.79    | 0.278  | 0.919 |
| PF3D7_1238200 | -0.0672 | 0.973  | 0.995 | 0.0413  | 0.984  | 0.998 |
| PF3D7_1011400 | -0.0212 | 0.981  | 0.997 | 2.86    | 0.395  | 0.919 |
| PF3D7_1330700 | 1.12    | 0.639  | 0.919 | 1.15    | 0.764  | 0.962 |
| PF3D7_0723700 | 0.83    | 0.542  | 0.918 | 5.45    | 0.178  | 0.919 |
| PF3D7_1461600 | -1.87   | 0.504  | 0.918 | 0.663   | 0.767  | 0.962 |
| PF3D7_1313500 | -6.32   | 0.132  | 0.918 | 4.6     | 0.219  | 0.919 |
| PF3D7_1466200 | -1.13   | 0.371  | 0.918 | 1.36    | 0.283  | 0.919 |
| PF3D7_1131800 | 0.881   | 0.812  | 0.953 | -3.2    | 0.606  | 0.939 |

|               |        |        |       |        |        |       |
|---------------|--------|--------|-------|--------|--------|-------|
| PF3D7_1150400 | 0.466  | 0.661  | 0.921 | 0.646  | 0.602  | 0.937 |
| PF3D7_1462600 | 2.12   | 0.492  | 0.918 | 1.29   | 0.738  | 0.957 |
| PF3D7_1419000 | -1.88  | 0.723  | 0.937 | 1.2    | 0.822  | 0.968 |
| PF3D7_1004000 | 2.36   | 0.544  | 0.918 | 0.956  | 0.729  | 0.957 |
| PF3D7_1238400 | 0.452  | 0.91   | 0.983 | 1.68   | 0.687  | 0.954 |
| PF3D7_0935900 | -1.86  | 0.378  | 0.918 | 2.56   | 0.393  | 0.919 |
| PF3D7_0211900 | -4.22  | 0.168  | 0.918 | 4.79   | 0.138  | 0.919 |
| PF3D7_1109100 | -1.95  | 0.245  | 0.918 | 11.8   | 0.0834 | 0.919 |
| PF3D7_1321000 | -2.57  | 0.421  | 0.918 | 3      | 0.33   | 0.919 |
| PF3D7_1479500 | -2.38  | 0.465  | 0.918 | 3.28   | 0.329  | 0.919 |
| PF3D7_1116000 | 0.113  | 0.97   | 0.994 | 0.835  | 0.766  | 0.962 |
| PF3D7_0704800 | -0.461 | 0.686  | 0.926 | 0.801  | 0.516  | 0.924 |
| PF3D7_0306400 | 9.67   | 0.125  | 0.918 | -3.56  | 0.396  | 0.919 |
| PF3D7_0601100 | 1.41   | 0.532  | 0.918 | -1.51  | 0.544  | 0.924 |
| PF3D7_1004800 | -0.585 | 0.836  | 0.961 | 5.6    | 0.148  | 0.919 |
| PF3D7_0412300 | 4.59   | 0.223  | 0.918 | -3.77  | 0.318  | 0.919 |
| PF3D7_1140600 | 4.92   | 0.302  | 0.918 | -4.44  | 0.356  | 0.919 |
| PF3D7_0524200 | -1     | 0.548  | 0.918 | 2.84   | 0.321  | 0.919 |
| PF3D7_1475200 | -6.07  | 0.306  | 0.918 | 5.45   | 0.242  | 0.919 |
| PF3D7_0628100 | 0.223  | 0.592  | 0.918 | -0.316 | 0.65   | 0.95  |
| PFI0460w      | -7.73  | 0.0539 | 0.918 | 11     | 0.034  | 0.919 |
| PF3D7_0608400 | -1.75  | 0.576  | 0.918 | 1.51   | 0.623  | 0.942 |
| PF3D7_1429900 | -1.22  | 0.758  | 0.941 | 0.982  | 0.829  | 0.971 |
| PF3D7_0320c   | 2.5    | 0.655  | 0.921 | 5.91   | 0.196  | 0.919 |
| PF3D7_1338400 | -1.78  | 0.318  | 0.918 | 4.96   | 0.151  | 0.919 |
| PF3D7_0807500 | -8.51  | 0.265  | 0.918 | 11.9   | 0.166  | 0.919 |
| PF3D7_1419700 | 1.3    | 0.649  | 0.92  | -3.83  | 0.315  | 0.919 |
| PF3D7_1303000 | 0.536  | 0.905  | 0.98  | -6.92  | 0.351  | 0.919 |
| PF3D7_0605400 | 7.44   | 0.254  | 0.918 | -8.68  | 0.218  | 0.919 |
| PF3D7_0604800 | 3.89   | 0.292  | 0.918 | -2.84  | 0.491  | 0.921 |
| PF3D7_1119300 | -3.63  | 0.367  | 0.918 | -4.84  | 0.443  | 0.919 |
| PF3D7_1254000 | -0.917 | 0.51   | 0.918 | -0.583 | 0.541  | 0.924 |
| PF3D7_1222700 | 3.43   | 0.382  | 0.918 | -3.49  | 0.357  | 0.919 |
| PF3D7_0722500 | 0.415  | 0.779  | 0.944 | -0.452 | 0.694  | 0.954 |
| PF3D7_0931200 | -0.172 | 0.965  | 0.993 | 0.043  | 0.991  | 0.998 |
| PF3D7_1461800 | 0.0348 | 0.967  | 0.993 | -0.211 | 0.863  | 0.98  |
| PF3D7_0501600 | 9.36   | 0.0729 | 0.918 | -6.32  | 0.125  | 0.919 |
| PF3D7_1340300 | 0.434  | 0.67   | 0.923 | -1.57  | 0.299  | 0.919 |
| PF3D7_1476300 | -2.19  | 0.471  | 0.918 | 2.39   | 0.446  | 0.919 |
| PF3D7_1465800 | -0.716 | 0.613  | 0.919 | 3.55   | 0.327  | 0.919 |
| PF3D7_1223900 | -3.29  | 0.298  | 0.918 | 4.3    | 0.23   | 0.919 |
| PF3D7_1214300 | 4.98   | 0.285  | 0.918 | -2.09  | 0.62   | 0.942 |
| PF3D7_0113400 | -2.16  | 0.275  | 0.918 | 1.92   | 0.283  | 0.919 |
| PF3D7_1319600 | -0.5   | 0.52   | 0.918 | 0.727  | 0.321  | 0.919 |
| PF3D7_0619400 | -0.193 | 0.938  | 0.989 | -1.12  | 0.676  | 0.954 |
| PF3D7_1326400 | -5.04  | 0.283  | 0.918 | 6.32   | 0.187  | 0.919 |
| PF3D7_0102400 | -3.75  | 0.465  | 0.918 | -2.15  | 0.665  | 0.952 |

|               |         |        |       |         |        |       |
|---------------|---------|--------|-------|---------|--------|-------|
| PF3D7_1466800 | 4.11    | 0.367  | 0.918 | -3.14   | 0.428  | 0.919 |
| PF3D7_1429100 | 7.39    | 0.0657 | 0.918 | -4.9    | 0.131  | 0.919 |
| PF3D7_0506000 | 3.81    | 0.193  | 0.918 | -0.412  | 0.861  | 0.98  |
| PF3D7_0628500 | 7.23    | 0.185  | 0.918 | -6.5    | 0.219  | 0.919 |
| PF3D7_1032300 | -13     | 0.0505 | 0.918 | 8.94    | 0.157  | 0.919 |
| PF3D7_0526100 | 24.4    | 0.0691 | 0.918 | -18.3   | 0.078  | 0.919 |
| PF3D7_0324800 | 1.55    | 0.32   | 0.918 | -0.553  | 0.676  | 0.954 |
| PF3D7_1002500 | -2.83   | 0.348  | 0.918 | 1.5     | 0.585  | 0.933 |
| PF3D7_0301600 | -0.144  | 0.966  | 0.993 | 1.07    | 0.784  | 0.963 |
| PF3D7_1330400 | -21.5   | 0.104  | 0.918 | 27.7    | 0.0888 | 0.919 |
| PF3D7_1201000 | -3.22   | 0.295  | 0.918 | 7.6     | 0.185  | 0.919 |
| PF3D7_0418000 | -6.7    | 0.167  | 0.918 | 7.71    | 0.0911 | 0.919 |
| PF3D7_0704000 | -0.0404 | 0.972  | 0.995 | -0.0349 | 0.978  | 0.998 |
| PF3D7_1302300 | -5.36   | 0.326  | 0.918 | 4.48    | 0.407  | 0.919 |
| PF3D7_0802900 | 0.519   | 0.853  | 0.967 | -1.4    | 0.717  | 0.957 |
| PF3D7_0717200 | 1.57    | 0.634  | 0.919 | -1.34   | 0.682  | 0.954 |
| PF3D7_0729700 | -0.268  | 0.792  | 0.949 | 2.59    | 0.182  | 0.919 |
| PF3D7_0724700 | -1.73   | 0.497  | 0.918 | 3.51    | 0.239  | 0.919 |
| PF3D7_0419800 | -4.73   | 0.358  | 0.918 | 6.26    | 0.29   | 0.919 |
| PF3D7_1454200 | -4.46   | 0.117  | 0.918 | 7.59    | 0.0576 | 0.919 |
| PF3D7_1473300 | -0.89   | 0.623  | 0.919 | 1.98    | 0.47   | 0.919 |
| PF3D7_1436200 | -2.87   | 0.311  | 0.918 | 2.81    | 0.316  | 0.919 |
| PF3D7_0515500 | 3.44    | 0.448  | 0.918 | -0.765  | 0.863  | 0.98  |
| PF3D7_1213900 | 1.75    | 0.486  | 0.918 | -1.24   | 0.645  | 0.95  |
| PF3D7_1467900 | 0.628   | 0.821  | 0.956 | -1.56   | 0.779  | 0.963 |
| PF3D7_1420000 | -4.07   | 0.323  | 0.918 | 5.31    | 0.171  | 0.919 |
| PF3D7_1135400 | -4.25   | 0.302  | 0.918 | 7.9     | 0.0577 | 0.919 |
| PF3D7_0403900 | -3.49   | 0.455  | 0.918 | 4.31    | 0.429  | 0.919 |
| PF3D7_0616200 | -0.276  | 0.922  | 0.985 | 1.81    | 0.486  | 0.92  |
| PF3D7_1005100 | 2.18    | 0.453  | 0.918 | 0.424   | 0.873  | 0.981 |
| PF3D7_1254700 | -0.957  | 0.758  | 0.941 | 1.13    | 0.729  | 0.957 |
| PF3D7_0627800 | -3.52   | 0.41   | 0.918 | -3.18   | 0.391  | 0.919 |
| PF3D7_0204900 | 4.02    | 0.256  | 0.918 | -4.37   | 0.22   | 0.919 |
| PF3D7_1439000 | -0.0269 | 0.995  | 0.999 | 7.42    | 0.226  | 0.919 |
| PF3D7_0215100 | -0.729  | 0.515  | 0.918 | 1.55    | 0.31   | 0.919 |
| PF3D7_1421800 | -0.846  | 0.788  | 0.948 | -0.495  | 0.903  | 0.984 |
| PF3D7_1223700 | -2.43   | 0.254  | 0.918 | 2.14    | 0.291  | 0.919 |
| PF3D7_0322200 | 1.54    | 0.376  | 0.918 | 1.15    | 0.643  | 0.95  |
| PF3D7_0517100 | 4.2     | 0.39   | 0.918 | -0.936  | 0.798  | 0.965 |
| PF3D7_0316600 | 1.97    | 0.595  | 0.918 | 0.174   | 0.966  | 0.997 |
| PF3D7_0610200 | -0.0223 | 0.965  | 0.993 | 0.298   | 0.818  | 0.968 |
| PF3D7_1406200 | -3.57   | 0.361  | 0.918 | 3.95    | 0.307  | 0.919 |
| PF3D7_0622900 | 6.2     | 0.245  | 0.918 | -7.17   | 0.152  | 0.919 |
| PF3D7_0314700 | 6.3     | 0.168  | 0.918 | -6.97   | 0.144  | 0.919 |
| PF3D7_1034900 | -3.41   | 0.543  | 0.918 | 3.2     | 0.334  | 0.919 |
| PF3D7_0509500 | -2.9    | 0.518  | 0.918 | 4.2     | 0.354  | 0.919 |
| PF3D7_0312100 | 0.253   | 0.943  | 0.989 | -1.81   | 0.692  | 0.954 |

|               |        |        |       |         |        |       |
|---------------|--------|--------|-------|---------|--------|-------|
| PF3D7_0102300 | 1.02   | 0.569  | 0.918 | -1.8    | 0.654  | 0.95  |
| PF3D7_0514000 | 7.82   | 0.253  | 0.918 | -3.93   | 0.53   | 0.924 |
| PF3D7_0312900 | 0.309  | 0.924  | 0.985 | 0.301   | 0.955  | 0.994 |
| PF3D7_0912400 | -4.52  | 0.324  | 0.918 | 2.27    | 0.405  | 0.919 |
| PF3D7_1418200 | 7.03   | 0.182  | 0.918 | -3.65   | 0.254  | 0.919 |
| PF3D7_1450100 | -1.56  | 0.584  | 0.918 | 1.33    | 0.72   | 0.957 |
| PF3D7_0207400 | -2.92  | 0.161  | 0.918 | 3.61    | 0.135  | 0.919 |
| PF3D7_0204200 | -4.59  | 0.283  | 0.918 | 4.8     | 0.299  | 0.919 |
| PF3D7_0609700 | 0.625  | 0.806  | 0.953 | 4.65    | 0.38   | 0.919 |
| PF3D7_1364200 | -1.3   | 0.389  | 0.918 | 2.73    | 0.299  | 0.919 |
| PF3D7_1315500 | 3.39   | 0.504  | 0.918 | -3.99   | 0.593  | 0.936 |
| PF3D7_1362500 | -0.958 | 0.314  | 0.918 | 1.21    | 0.289  | 0.919 |
| PF3D7_1425200 | 1.94   | 0.578  | 0.918 | 0.359   | 0.928  | 0.989 |
| PF3D7_1008700 | -6.78  | 0.137  | 0.918 | 4.28    | 0.212  | 0.919 |
| PF3D7_1363800 | 1.86   | 0.701  | 0.931 | -1.57   | 0.739  | 0.958 |
| PF3D7_0303600 | -2.95  | 0.495  | 0.918 | 2.08    | 0.642  | 0.95  |
| PF3D7_0626000 | -1.05  | 0.569  | 0.918 | 1.06    | 0.603  | 0.937 |
| PF3D7_0807300 | -1.2   | 0.546  | 0.918 | 1.74    | 0.669  | 0.954 |
| PF3D7_1307100 | 2.81   | 0.5    | 0.918 | -2.59   | 0.505  | 0.924 |
| PF3D7_1248600 | -0.913 | 0.804  | 0.953 | 1.62    | 0.725  | 0.957 |
| PF3D7_1016200 | 1.86   | 0.274  | 0.918 | -2.68   | 0.144  | 0.919 |
| PF3D7_1122100 | 7.57   | 0.164  | 0.918 | -5.92   | 0.284  | 0.919 |
| PF3D7_0111700 | 2.33   | 0.216  | 0.918 | 1.86    | 0.388  | 0.919 |
| PF3D7_1004500 | 0.178  | 0.959  | 0.992 | 0.439   | 0.888  | 0.982 |
| PF3D7_0819000 | -3.94  | 0.176  | 0.918 | 2.79    | 0.243  | 0.919 |
| PF3D7_0702600 | 2.71   | 0.343  | 0.918 | -9.18   | 0.213  | 0.919 |
| PF13_0267     | 14.9   | 0.0954 | 0.918 | -9.53   | 0.0909 | 0.919 |
| PF3D7_0925100 | -2.85  | 0.449  | 0.918 | 2.32    | 0.627  | 0.945 |
| PF3D7_0724400 | -11.6  | 0.142  | 0.918 | 10.6    | 0.107  | 0.919 |
| PF3D7_1037900 | -0.807 | 0.888  | 0.979 | 0.973   | 0.853  | 0.977 |
| PF3D7_0321700 | -8.83  | 0.205  | 0.918 | 7.19    | 0.233  | 0.919 |
| PF3D7_0323300 | -0.827 | 0.359  | 0.918 | 0.791   | 0.426  | 0.919 |
| PF3D7_1115400 | -1.53  | 0.533  | 0.918 | 3.6     | 0.183  | 0.919 |
| PF3D7_1473700 | 1.55   | 0.645  | 0.919 | -0.812  | 0.801  | 0.965 |
| PF3D7_1107000 | -0.823 | 0.644  | 0.919 | 2.09    | 0.374  | 0.919 |
| PF3D7_0925800 | -0.877 | 0.573  | 0.918 | -0.0153 | 0.993  | 0.998 |
| PF3D7_1354000 | 2.46   | 0.58   | 0.918 | -4.33   | 0.455  | 0.919 |
| PF3D7_0906800 | 0.322  | 0.902  | 0.98  | -0.205  | 0.959  | 0.994 |
| PF3D7_1438100 | -5.48  | 0.339  | 0.918 | 3.66    | 0.367  | 0.919 |
| PF3D7_1035200 | -3.61  | 0.233  | 0.918 | 3       | 0.372  | 0.919 |
| PF3D7_0408800 | -4.86  | 0.188  | 0.918 | 4.5     | 0.164  | 0.919 |
| PF3D7_0826400 | -7.45  | 0.319  | 0.918 | 8.91    | 0.224  | 0.919 |
| PF3D7_0215000 | -5.7   | 0.247  | 0.918 | 3.11    | 0.434  | 0.919 |
| PF3D7_1028700 | -0.17  | 0.902  | 0.98  | 0.75    | 0.621  | 0.942 |
| PF3D7_0829100 | 0.96   | 0.59   | 0.918 | -1.75   | 0.673  | 0.954 |
| PF3D7_1357500 | -0.378 | 0.932  | 0.987 | -0.657  | 0.889  | 0.982 |
| PF3D7_1143000 | -0.411 | 0.892  | 0.98  | 0.814   | 0.781  | 0.963 |



|               |          |        |       |        |        |       |
|---------------|----------|--------|-------|--------|--------|-------|
| PF10_0218     | 15.8     | 0.0765 | 0.918 | -12.4  | 0.0966 | 0.919 |
| PF3D7_0529000 | 0.687    | 0.8    | 0.953 | 2.46   | 0.474  | 0.919 |
| PF3D7_0217300 | -7.13    | 0.247  | 0.918 | 6.67   | 0.263  | 0.919 |
| PF3D7_1209500 | -2.28    | 0.253  | 0.918 | 3.02   | 0.155  | 0.919 |
| PF3D7_1360400 | -6.94    | 0.148  | 0.918 | 7.15   | 0.179  | 0.919 |
| PF3D7_1303200 | -0.511   | 0.75   | 0.94  | -0.714 | 0.882  | 0.981 |
| PF3D7_0934000 | 0.224    | 0.907  | 0.981 | 0.342  | 0.862  | 0.98  |
| PF3D7_1449200 | -0.892   | 0.612  | 0.919 | 1.07   | 0.649  | 0.95  |
| PF3D7_0321000 | -5.65    | 0.281  | 0.918 | 5.18   | 0.339  | 0.919 |
| PF3D7_1447200 | -5.21    | 0.188  | 0.918 | 5.22   | 0.311  | 0.919 |
| PF3D7_0300900 | 1.18     | 0.596  | 0.918 | 1.79   | 0.53   | 0.924 |
| PF3D7_1351000 | 3.39     | 0.273  | 0.918 | -4.06  | 0.202  | 0.919 |
| PF3D7_1249300 | -0.893   | 0.749  | 0.94  | 0.54   | 0.889  | 0.982 |
| PF3D7_1459900 | 1.67     | 0.536  | 0.918 | -0.681 | 0.777  | 0.963 |
| PF3D7_1146600 | 1.7      | 0.442  | 0.918 | -0.715 | 0.65   | 0.95  |
| PF3D7_0615200 | 3.19     | 0.56   | 0.918 | -5.51  | 0.329  | 0.919 |
| PF3D7_0108700 | -0.102   | 0.964  | 0.993 | 2.04   | 0.302  | 0.919 |
| PF3D7_0602200 | -0.608   | 0.802  | 0.953 | 1.64   | 0.442  | 0.919 |
| PF3D7_1236300 | 0.709    | 0.835  | 0.961 | -0.94  | 0.809  | 0.967 |
| PF3D7_0920900 | -0.00917 | 0.997  | 0.999 | -0.819 | 0.773  | 0.963 |
| PF3D7_1246600 | 3.39     | 0.394  | 0.918 | -4.98  | 0.362  | 0.919 |
| PF3D7_1149300 | 2.06     | 0.283  | 0.918 | 1.06   | 0.584  | 0.933 |
| PF3D7_1333400 | -3.73    | 0.101  | 0.918 | 10.4   | 0.0863 | 0.919 |
| PF3D7_1335800 | -5       | 0.152  | 0.918 | 3.2    | 0.293  | 0.919 |
| PF3D7_1407300 | 1.59     | 0.242  | 0.918 | 0.536  | 0.686  | 0.954 |
| PF3D7_0414600 | -19.2    | 0.0467 | 0.918 | 18.7   | 0.0828 | 0.919 |
| PF3D7_1229800 | -4.07    | 0.413  | 0.918 | 6.25   | 0.45   | 0.919 |
| PF3D7_1326700 | 1.54     | 0.284  | 0.918 | -2.07  | 0.28   | 0.919 |
| PF3D7_0408400 | -2.77    | 0.496  | 0.918 | 2.36   | 0.633  | 0.948 |
| PF3D7_0807600 | -0.368   | 0.906  | 0.981 | 0.736  | 0.885  | 0.981 |
| PF3D7_1109200 | -3.91    | 0.395  | 0.918 | 1.64   | 0.741  | 0.958 |
| PFD0310w      | 0.423    | 0.889  | 0.979 | 4.51   | 0.202  | 0.919 |
| PF3D7_0926900 | -4.8     | 0.298  | 0.918 | 6.59   | 0.346  | 0.919 |
| PF3D7_0825900 | -0.677   | 0.855  | 0.967 | 1.84   | 0.677  | 0.954 |
| PF3D7_1225900 | -15.3    | 0.0447 | 0.918 | 6.94   | 0.17   | 0.919 |
| PF3D7_0727100 | -0.735   | 0.621  | 0.919 | 1.11   | 0.5    | 0.924 |
| PF3D7_1347100 | 0.748    | 0.833  | 0.96  | -1.05  | 0.768  | 0.962 |
| PF3D7_1016900 | -0.654   | 0.796  | 0.952 | 2.59   | 0.304  | 0.919 |
| PF3D7_1251400 | -1.91    | 0.717  | 0.935 | 4.63   | 0.408  | 0.919 |
| PF3D7_1451200 | 1.19     | 0.811  | 0.953 | -0.849 | 0.863  | 0.98  |
| PF3D7_0219100 | 2.09     | 0.612  | 0.919 | -3.05  | 0.469  | 0.919 |
| PF3D7_0929800 | 1.08     | 0.692  | 0.928 | -1.47  | 0.643  | 0.95  |
| PF3D7_1451000 | -3.3     | 0.44   | 0.918 | 1.09   | 0.784  | 0.963 |
| PF3D7_0917400 | -0.698   | 0.613  | 0.919 | 0.196  | 0.905  | 0.984 |
| PF3D7_1309500 | -1.12    | 0.588  | 0.918 | 1.64   | 0.522  | 0.924 |
| PF3D7_0915600 | 2.65     | 0.613  | 0.919 | -3.89  | 0.441  | 0.919 |
| PF3D7_0306500 | -0.879   | 0.844  | 0.963 | 1.72   | 0.641  | 0.95  |

|               |        |        |       |         |       |       |
|---------------|--------|--------|-------|---------|-------|-------|
| PF3D7_1217800 | -2.13  | 0.501  | 0.918 | 3.03    | 0.556 | 0.927 |
| PF3D7_0708300 | 9.34   | 0.111  | 0.918 | -6.26   | 0.111 | 0.919 |
| PF3D7_1007200 | -5.85  | 0.301  | 0.918 | 4.25    | 0.47  | 0.919 |
| PF3D7_1412400 | 3.92   | 0.222  | 0.918 | -2.55   | 0.503 | 0.924 |
| PF3D7_1104700 | -1.26  | 0.763  | 0.941 | -1.64   | 0.561 | 0.927 |
| PF3D7_0203100 | 1.93   | 0.293  | 0.918 | 5.77    | 0.115 | 0.919 |
| PF3D7_0303700 | -1.42  | 0.348  | 0.918 | 1.78    | 0.262 | 0.919 |
| PF3D7_1017900 | -2.72  | 0.399  | 0.918 | 1.59    | 0.65  | 0.95  |
| PF3D7_1446400 | 0.591  | 0.863  | 0.971 | 0.918   | 0.77  | 0.963 |
| PF3D7_1415900 | -0.107 | 0.956  | 0.992 | -2.66   | 0.545 | 0.924 |
| PF3D7_0531300 | -0.562 | 0.703  | 0.931 | 0.375   | 0.918 | 0.987 |
| PF3D7_1330800 | 2.45   | 0.376  | 0.918 | -2.45   | 0.255 | 0.919 |
| PF3D7_0828400 | 1.29   | 0.57   | 0.918 | 0.053   | 0.98  | 0.998 |
| PF3D7_0925600 | 3.66   | 0.509  | 0.918 | -2.07   | 0.604 | 0.937 |
| PF3D7_1036500 | -0.212 | 0.603  | 0.918 | 1.02    | 0.311 | 0.919 |
| PF3D7_0415600 | 0.364  | 0.895  | 0.98  | -1.22   | 0.704 | 0.954 |
| PF3D7_1307500 | -1.8   | 0.739  | 0.938 | 1.49    | 0.784 | 0.963 |
| PF3D7_1429400 | 3.37   | 0.318  | 0.918 | -3.16   | 0.358 | 0.919 |
| PF3D7_1457700 | -4.71  | 0.279  | 0.918 | 4.46    | 0.342 | 0.919 |
| PF3D7_0728900 | -5.01  | 0.126  | 0.918 | 2.37    | 0.626 | 0.945 |
| PF3D7_1463300 | -1.74  | 0.58   | 0.918 | 1.24    | 0.69  | 0.954 |
| PF3D7_1402500 | -2.62  | 0.395  | 0.918 | 3.82    | 0.447 | 0.919 |
| PF3D7_0625300 | 2      | 0.414  | 0.918 | -2.64   | 0.364 | 0.919 |
| PF3D7_0935200 | -2.17  | 0.369  | 0.918 | 2.37    | 0.476 | 0.919 |
| PF3D7_1459300 | -0.823 | 0.845  | 0.963 | -0.18   | 0.971 | 0.998 |
| PFC0330w      | -3.07  | 0.32   | 0.918 | 4.46    | 0.199 | 0.919 |
| PF3D7_0703900 | -0.951 | 0.354  | 0.918 | -0.391  | 0.794 | 0.965 |
| PF3D7_1111700 | -0.704 | 0.758  | 0.941 | -0.499  | 0.892 | 0.982 |
| PF3D7_1008500 | -0.157 | 0.953  | 0.992 | 2.95    | 0.514 | 0.924 |
| PF3D7_1128600 | -2.4   | 0.565  | 0.918 | 3.66    | 0.169 | 0.919 |
| PF3D7_0607200 | -2.93  | 0.336  | 0.918 | 1.61    | 0.557 | 0.927 |
| PF3D7_0529100 | 14.8   | 0.112  | 0.918 | -7.61   | 0.123 | 0.919 |
| PF3D7_1222900 | -3.69  | 0.245  | 0.918 | 6       | 0.222 | 0.919 |
| PF3D7_1339900 | -14.2  | 0.0783 | 0.918 | 10.8    | 0.134 | 0.919 |
| PF3D7_1433400 | -0.188 | 0.893  | 0.98  | 1.16    | 0.525 | 0.924 |
| PF3D7_0830900 | -3.22  | 0.267  | 0.918 | 4.66    | 0.112 | 0.919 |
| PF3D7_0200600 | -1.65  | 0.366  | 0.918 | 1.3     | 0.455 | 0.919 |
| PF3D7_0706500 | 0.999  | 0.576  | 0.918 | -0.717  | 0.676 | 0.954 |
| PF3D7_0602300 | 3.21   | 0.442  | 0.918 | -0.0814 | 0.984 | 0.998 |
| PF3D7_0729300 | -9.99  | 0.19   | 0.918 | 8.4     | 0.179 | 0.919 |
| PF3D7_0626200 | -3.93  | 0.172  | 0.918 | 3.71    | 0.223 | 0.919 |
| PF3D7_1345400 | -12.7  | 0.0686 | 0.918 | 8.99    | 0.212 | 0.919 |
| PF3D7_1242200 | -0.267 | 0.662  | 0.921 | 1.01    | 0.678 | 0.954 |
| PF3D7_0902000 | 0.536  | 0.608  | 0.918 | 4.27    | 0.234 | 0.919 |
| PF3D7_0908900 | 2.15   | 0.74   | 0.938 | 12.6    | 0.244 | 0.919 |
| PF3D7_1478000 | -7.81  | 0.146  | 0.918 | 7.97    | 0.288 | 0.919 |
| PF3D7_0710600 | 1.74   | 0.747  | 0.94  | -0.0582 | 0.991 | 0.998 |

|               |         |        |       |        |        |       |
|---------------|---------|--------|-------|--------|--------|-------|
| PF3D7_0305700 | 8.74    | 0.216  | 0.918 | -7.97  | 0.352  | 0.919 |
| PF3D7_0105900 | -1.98   | 0.66   | 0.921 | 2.55   | 0.559  | 0.927 |
| PF3D7_1428100 | -7.42   | 0.101  | 0.918 | 3.06   | 0.469  | 0.919 |
| PF3D7_1141900 | -4.17   | 0.213  | 0.918 | 4.79   | 0.18   | 0.919 |
| PF3D7_1107800 | -2.25   | 0.392  | 0.918 | 1.03   | 0.727  | 0.957 |
| PF3D7_0603900 | -6.47   | 0.28   | 0.918 | 8.17   | 0.319  | 0.919 |
| PF3D7_1442500 | 1.47    | 0.302  | 0.918 | 1.2    | 0.627  | 0.945 |
| PF3D7_1128500 | 0.116   | 0.725  | 0.937 | 0.0409 | 0.947  | 0.994 |
| PF3D7_1233000 | -4.17   | 0.313  | 0.918 | 2.21   | 0.544  | 0.924 |
| PF3D7_1475300 | -4.22   | 0.401  | 0.918 | 2.75   | 0.63   | 0.946 |
| PF3D7_1344300 | -4.86   | 0.474  | 0.918 | 2.43   | 0.65   | 0.95  |
| PF3D7_1028200 | 0.801   | 0.803  | 0.953 | 0.958  | 0.762  | 0.962 |
| PF3D7_1251200 | -1.04   | 0.834  | 0.96  | -0.338 | 0.95   | 0.994 |
| PF3D7_0715700 | 4.23    | 0.289  | 0.918 | -6     | 0.256  | 0.919 |
| PF3D7_1226700 | 0.446   | 0.744  | 0.94  | 1.77   | 0.318  | 0.919 |
| PF3D7_1410800 | 1.19    | 0.415  | 0.918 | 0.384  | 0.8    | 0.965 |
| PF3D7_0526600 | -0.691  | 0.322  | 0.918 | 0.487  | 0.455  | 0.919 |
| PF3D7_1322200 | -0.0831 | 0.973  | 0.995 | 1.67   | 0.523  | 0.924 |
| PF3D7_0818400 | -7.86   | 0.203  | 0.918 | 2.89   | 0.611  | 0.942 |
| PF3D7_0206900 | 0.974   | 0.525  | 0.918 | 4.11   | 0.219  | 0.919 |
| PF3D7_0407500 | -6.69   | 0.232  | 0.918 | 5.11   | 0.319  | 0.919 |
| PF3D7_0932900 | -5.62   | 0.294  | 0.918 | 4.55   | 0.423  | 0.919 |
| PF3D7_0914800 | 2.81    | 0.437  | 0.918 | -3.06  | 0.387  | 0.919 |
| PF3D7_1424100 | -3.22   | 0.386  | 0.918 | 3.04   | 0.398  | 0.919 |
| PF3D7_0603500 | -1.06   | 0.345  | 0.918 | 1.94   | 0.182  | 0.919 |
| PF3D7_1369000 | 0.819   | 0.702  | 0.931 | 0.0615 | 0.98   | 0.998 |
| PF3D7_1430800 | -0.0886 | 0.979  | 0.997 | 2      | 0.652  | 0.95  |
| PF3D7_0509300 | 2.36    | 0.496  | 0.918 | -3.56  | 0.397  | 0.919 |
| PF3D7_0500900 | -2.67   | 0.18   | 0.918 | 2.76   | 0.169  | 0.919 |
| PF3D7_1405800 | 5.41    | 0.237  | 0.918 | -2.83  | 0.523  | 0.924 |
| PF3D7_1001300 | -2.26   | 0.573  | 0.918 | 10.2   | 0.12   | 0.919 |
| PF3D7_1305700 | 0.736   | 0.687  | 0.927 | 1.08   | 0.452  | 0.919 |
| PF3D7_0721400 | 4.53    | 0.343  | 0.918 | -8.7   | 0.179  | 0.919 |
| PF3D7_1124400 | 1.16    | 0.539  | 0.918 | -1.93  | 0.362  | 0.919 |
| PF3D7_1357600 | 2.14    | 0.549  | 0.918 | -0.527 | 0.903  | 0.984 |
| PF3D7_1473500 | -2.36   | 0.284  | 0.918 | -0.248 | 0.933  | 0.992 |
| PF3D7_1037300 | 2.45    | 0.451  | 0.918 | -2.76  | 0.341  | 0.919 |
| PF3D7_0615800 | 0.0692  | 0.865  | 0.972 | 2.3    | 0.485  | 0.92  |
| PF3D7_1236700 | -0.801  | 0.815  | 0.953 | 5.35   | 0.148  | 0.919 |
| PF3D7_1122500 | -0.665  | 0.429  | 0.918 | 1.19   | 0.445  | 0.919 |
| PF3D7_0623400 | -4.31   | 0.133  | 0.918 | 5.62   | 0.088  | 0.919 |
| PF3D7_1411900 | -13.4   | 0.0829 | 0.918 | 13.4   | 0.0481 | 0.919 |
| PF3D7_0600300 | -0.468  | 0.788  | 0.948 | 1.02   | 0.59   | 0.935 |
| PF3D7_0404200 | -3.68   | 0.309  | 0.918 | 4.37   | 0.294  | 0.919 |
| PF3D7_0412100 | 9.03    | 0.174  | 0.918 | -10.2  | 0.141  | 0.919 |
| PF3D7_1470200 | -8.15   | 0.368  | 0.918 | 6.2    | 0.287  | 0.919 |
| PF3D7_1133600 | -3.08   | 0.576  | 0.918 | 3.42   | 0.539  | 0.924 |

|               |         |        |       |        |        |       |
|---------------|---------|--------|-------|--------|--------|-------|
| PF3D7_1365500 | -14.6   | 0.0391 | 0.918 | 14.1   | 0.0545 | 0.919 |
| PF3D7_1006700 | 0.745   | 0.426  | 0.918 | 0.489  | 0.638  | 0.95  |
| PF3D7_1101100 | 0.392   | 0.81   | 0.953 | 0.0983 | 0.957  | 0.994 |
| PF3D7_0528100 | -18.9   | 0.0785 | 0.918 | 14.2   | 0.0747 | 0.919 |
| PF3D7_0617900 | -0.408  | 0.818  | 0.955 | -0.229 | 0.948  | 0.994 |
| PF3D7_0526000 | -8.29   | 0.227  | 0.918 | 6.93   | 0.198  | 0.919 |
| PF3D7_0208600 | 0.819   | 0.773  | 0.943 | 2.62   | 0.451  | 0.919 |
| PF3D7_1468900 | -1.15   | 0.816  | 0.953 | -3.4   | 0.34   | 0.919 |
| PF3D7_1467300 | 8.49    | 0.103  | 0.918 | -5.8   | 0.188  | 0.919 |
| PF3D7_1470300 | 2.63    | 0.425  | 0.918 | -3.66  | 0.334  | 0.919 |
| PF3D7_0402400 | -4.68   | 0.0699 | 0.918 | 5.09   | 0.0708 | 0.919 |
| PF3D7_1425500 | -7.62   | 0.111  | 0.918 | 7.3    | 0.214  | 0.919 |
| PF3D7_0610900 | 0.512   | 0.809  | 0.953 | -0.993 | 0.58   | 0.933 |
| PF3D7_1402900 | -5.78   | 0.24   | 0.918 | 8.56   | 0.116  | 0.919 |
| PF3D7_1311300 | 1.19    | 0.539  | 0.918 | -1.01  | 0.804  | 0.966 |
| PF3D7_0936500 | -1.85   | 0.791  | 0.949 | 2.08   | 0.756  | 0.962 |
| PF3D7_1367400 | 0.4     | 0.781  | 0.945 | -0.746 | 0.591  | 0.935 |
| PF3D7_1420600 | 2.79    | 0.465  | 0.918 | 0.363  | 0.933  | 0.992 |
| PF3D7_0930200 | 3.29    | 0.496  | 0.918 | -2.11  | 0.627  | 0.945 |
| PF3D7_1105500 | 7.98    | 0.175  | 0.918 | -10.9  | 0.165  | 0.919 |
| PF3D7_0707600 | -7.18   | 0.218  | 0.918 | 4.88   | 0.234  | 0.919 |
| PF3D7_1434600 | -1.43   | 0.377  | 0.918 | 2      | 0.27   | 0.919 |
| PF3D7_1118700 | 0.373   | 0.859  | 0.97  | -0.64  | 0.874  | 0.981 |
| PF3D7_0313000 | -2.37   | 0.404  | 0.918 | 2.5    | 0.336  | 0.919 |
| PF3D7_1421400 | -4.01   | 0.154  | 0.918 | 3.94   | 0.162  | 0.919 |
| PF3D7_0419900 | 0.155   | 0.761  | 0.941 | 0.29   | 0.626  | 0.945 |
| PF3D7_1225000 | 4.96    | 0.267  | 0.918 | -4.84  | 0.264  | 0.919 |
| PF3D7_1403500 | 0.536   | 0.939  | 0.989 | 3.46   | 0.544  | 0.924 |
| PF3D7_1322400 | -1.43   | 0.636  | 0.919 | 1.47   | 0.598  | 0.936 |
| PF3D7_0423100 | 1.87    | 0.581  | 0.918 | -1.42  | 0.687  | 0.954 |
| PF3D7_0212300 | 0.442   | 0.89   | 0.979 | 0.226  | 0.947  | 0.994 |
| PF3D7_0621700 | 1.29    | 0.569  | 0.918 | -1.24  | 0.792  | 0.965 |
| PF11_0440     | -1.4    | 0.493  | 0.918 | 1.31   | 0.512  | 0.924 |
| PF3D7_0823600 | -2.04   | 0.552  | 0.918 | 2.27   | 0.509  | 0.924 |
| PF3D7_0114800 | 2.23    | 0.377  | 0.918 | -2.56  | 0.226  | 0.919 |
| PF3D7_1353800 | -0.0258 | 0.994  | 0.999 | -0.332 | 0.948  | 0.994 |
| PF3D7_0701700 | 2.47    | 0.627  | 0.919 | -2.93  | 0.547  | 0.924 |
| PF3D7_0824800 | 4.67    | 0.11   | 0.918 | 2.27   | 0.369  | 0.919 |
| PF3D7_0604400 | 0.0843  | 0.973  | 0.995 | 2.36   | 0.428  | 0.919 |
| PF3D7_1422400 | -2.74   | 0.489  | 0.918 | 2.35   | 0.602  | 0.937 |
| PF3D7_1364500 | -1.09   | 0.769  | 0.942 | 7.4    | 0.111  | 0.919 |
| PF3D7_1036400 | -0.444  | 0.372  | 0.918 | 1.64   | 0.0445 | 0.919 |
| PF3D7_0302800 | 0.0845  | 0.933  | 0.987 | 0.299  | 0.898  | 0.983 |
| PF3D7_0828100 | -0.134  | 0.802  | 0.953 | 1.44   | 0.284  | 0.919 |
| PF3D7_0520700 | -4.12   | 0.449  | 0.918 | 4.25   | 0.214  | 0.919 |
| PF3D7_1422700 | 2.43    | 0.244  | 0.918 | 5.3    | 0.143  | 0.919 |
| PF13_0125     | 0.037   | 0.974  | 0.995 | 1.53   | 0.679  | 0.954 |

|               |         |        |       |         |        |       |
|---------------|---------|--------|-------|---------|--------|-------|
| PF3D7_0810300 | -0.574  | 0.875  | 0.977 | 0.859   | 0.818  | 0.968 |
| PF3D7_1224700 | 0.436   | 0.512  | 0.918 | -0.786  | 0.521  | 0.924 |
| PF3D7_1021900 | -1.09   | 0.728  | 0.937 | 2.52    | 0.369  | 0.919 |
| PF3D7_1124800 | -7.45   | 0.122  | 0.918 | 5.57    | 0.194  | 0.919 |
| PF3D7_0723800 | 0.881   | 0.599  | 0.918 | -0.676  | 0.748  | 0.959 |
| PF3D7_0412000 | -0.0259 | 0.961  | 0.992 | -0.138  | 0.914  | 0.986 |
| PF3D7_0723400 | -2.72   | 0.355  | 0.918 | -0.547  | 0.884  | 0.981 |
| PF3D7_0922200 | -1.84   | 0.619  | 0.919 | 4.34    | 0.38   | 0.919 |
| PF3D7_1139900 | 2.4     | 0.547  | 0.918 | -2.35   | 0.576  | 0.933 |
| PF3D7_1408300 | -1.99   | 0.604  | 0.918 | 1.87    | 0.717  | 0.957 |
| PF3D7_0815000 | 0.258   | 0.939  | 0.989 | -0.343  | 0.921  | 0.989 |
| PF3D7_0313900 | -2.83   | 0.571  | 0.918 | 2.96    | 0.587  | 0.934 |
| PF3D7_0222800 | -0.991  | 0.58   | 0.918 | 3.53    | 0.294  | 0.919 |
| PF3D7_1432800 | -3.97   | 0.178  | 0.918 | -0.106  | 0.977  | 0.998 |
| PF3D7_0109800 | -2.27   | 0.498  | 0.918 | 1.25    | 0.602  | 0.937 |
| PF3D7_0304700 | -5.8    | 0.157  | 0.918 | 5.7     | 0.106  | 0.919 |
| PF3D7_0622800 | -0.972  | 0.336  | 0.918 | 2.37    | 0.113  | 0.919 |
| PF3D7_1369300 | -8.85   | 0.231  | 0.918 | 8.25    | 0.255  | 0.919 |
| PF3D7_0422200 | -0.46   | 0.72   | 0.937 | 0.763   | 0.628  | 0.945 |
| PF3D7_0207800 | -4      | 0.365  | 0.918 | 4.57    | 0.281  | 0.919 |
| PF3D7_1361800 | -3.32   | 0.444  | 0.918 | 6.18    | 0.153  | 0.919 |
| PF3D7_1134000 | -1.72   | 0.497  | 0.918 | 1.32    | 0.557  | 0.927 |
| PF3D7_0700200 | 0.605   | 0.688  | 0.927 | -0.735  | 0.58   | 0.933 |
| PF3D7_1419400 | -1.41   | 0.412  | 0.918 | 1.41    | 0.372  | 0.919 |
| PF3D7_0803500 | 0.0966  | 0.966  | 0.993 | -1.02   | 0.717  | 0.957 |
| PF3D7_1357900 | -7.3    | 0.171  | 0.918 | 9.27    | 0.0647 | 0.919 |
| PF3D7_0806800 | 0.0908  | 0.98   | 0.997 | -1.16   | 0.751  | 0.961 |
| PF3D7_0832500 | -2.1    | 0.326  | 0.918 | 3.16    | 0.31   | 0.919 |
| PF3D7_0706100 | -1.77   | 0.335  | 0.918 | 0.428   | 0.777  | 0.963 |
| PF3D7_0620600 | -3.11   | 0.278  | 0.918 | 9.88    | 0.111  | 0.919 |
| PF3D7_0216800 | 1.72    | 0.305  | 0.918 | -0.0224 | 0.987  | 0.998 |
| PF3D7_1316900 | -0.202  | 0.824  | 0.957 | -1.73   | 0.255  | 0.919 |
| PF3D7_0728200 | -1.64   | 0.346  | 0.918 | 15.6    | 0.0583 | 0.919 |
| PF3D7_1214900 | 6.47    | 0.368  | 0.918 | -2.13   | 0.745  | 0.958 |
| PF3D7_1417200 | -0.537  | 0.472  | 0.918 | 0.406   | 0.647  | 0.95  |
| PF3D7_0516300 | 0.00527 | 0.999  | 1     | 1.09    | 0.684  | 0.954 |
| PF3D7_0931700 | -7.74   | 0.127  | 0.918 | 7.67    | 0.118  | 0.919 |
| PF3D7_1004900 | -3.85   | 0.377  | 0.918 | 3.62    | 0.418  | 0.919 |
| PF3D7_1118800 | -5.38   | 0.299  | 0.918 | 6.57    | 0.176  | 0.919 |
| PF3D7_1111800 | 0.485   | 0.415  | 0.918 | 0.499   | 0.473  | 0.919 |
| PF3D7_0601200 | 3.33    | 0.41   | 0.918 | -2.46   | 0.515  | 0.924 |
| PF3D7_1402000 | 5.79    | 0.413  | 0.918 | -5.68   | 0.467  | 0.919 |
| PF3D7_1237300 | 3.24    | 0.386  | 0.918 | -3.17   | 0.407  | 0.919 |
| PF3D7_0521400 | 0.776   | 0.442  | 0.918 | 0.382   | 0.703  | 0.954 |
| PF3D7_1401700 | -0.466  | 0.862  | 0.971 | -1.17   | 0.732  | 0.957 |
| PF3D7_1014300 | -1.32   | 0.537  | 0.918 | 3.08    | 0.215  | 0.919 |
| PF3D7_0805900 | -9.53   | 0.0528 | 0.918 | 7.04    | 0.078  | 0.919 |

|               |         |        |       |        |        |       |
|---------------|---------|--------|-------|--------|--------|-------|
| PF3D7_1245200 | -5.26   | 0.356  | 0.918 | 5.68   | 0.317  | 0.919 |
| PF3D7_1468100 | 0.128   | 0.71   | 0.933 | 0.072  | 0.891  | 0.982 |
| PF3D7_0304400 | -25.4   | 0.0685 | 0.918 | 25.8   | 0.0909 | 0.919 |
| PF3D7_1013800 | -0.372  | 0.898  | 0.98  | 0.0451 | 0.988  | 0.998 |
| PF3D7_0205200 | -1.34   | 0.545  | 0.918 | 1.92   | 0.518  | 0.924 |
| PF3D7_1457400 | -2.43   | 0.426  | 0.918 | 1.1    | 0.742  | 0.958 |
| PF3D7_1108900 | -2.61   | 0.31   | 0.918 | 0.625  | 0.819  | 0.968 |
| PF3D7_0617800 | -5.92   | 0.333  | 0.918 | 2.98   | 0.585  | 0.933 |
| PF3D7_1101700 | 0.372   | 0.844  | 0.963 | 0.713  | 0.682  | 0.954 |
| PF3D7_0202300 | 17      | 0.0645 | 0.918 | -17.2  | 0.0677 | 0.919 |
| PF3D7_1226800 | -0.992  | 0.694  | 0.93  | 3.79   | 0.297  | 0.919 |
| PF3D7_0414500 | 3.94    | 0.429  | 0.918 | -6.5   | 0.427  | 0.919 |
| PF3D7_1354300 | 0.578   | 0.897  | 0.98  | -1.55  | 0.689  | 0.954 |
| PF3D7_0628700 | -9.43   | 0.292  | 0.918 | 9.18   | 0.278  | 0.919 |
| PF3D7_0608000 | -2.41   | 0.579  | 0.918 | 1.54   | 0.763  | 0.962 |
| PF3D7_0907600 | -0.525  | 0.7    | 0.931 | 1.04   | 0.425  | 0.919 |
| PF3D7_1327400 | -0.0318 | 0.995  | 0.999 | 3.19   | 0.53   | 0.924 |
| PF3D7_0903000 | -0.46   | 0.848  | 0.965 | -0.122 | 0.958  | 0.994 |
| PF3D7_1124000 | -9.97   | 0.116  | 0.918 | 12.8   | 0.148  | 0.919 |
| PF3D7_1238700 | 0.381   | 0.924  | 0.985 | 0.179  | 0.961  | 0.995 |
| PF3D7_1435500 | -4.71   | 0.298  | 0.918 | 6.35   | 0.174  | 0.919 |
| PF3D7_0900700 | 1.46    | 0.278  | 0.918 | 0.355  | 0.802  | 0.965 |
| PF3D7_0311000 | 8.26    | 0.11   | 0.918 | -14.8  | 0.0396 | 0.919 |
| PF3D7_0419500 | -14.6   | 0.0497 | 0.918 | 15.1   | 0.0576 | 0.919 |
| PF3D7_0607500 | -1.1    | 0.694  | 0.93  | 1.83   | 0.511  | 0.924 |
| PF3D7_0300400 | 0.318   | 0.753  | 0.94  | 0.585  | 0.654  | 0.95  |
| PF3D7_0924700 | 3.46    | 0.311  | 0.918 | -4.4   | 0.187  | 0.919 |
| PF3D7_1232500 | 0.451   | 0.914  | 0.984 | -0.765 | 0.662  | 0.951 |
| PF3D7_0723100 | -3.99   | 0.268  | 0.918 | 3.9    | 0.309  | 0.919 |
| PF3D7_1228300 | -3.59   | 0.267  | 0.918 | 4.58   | 0.266  | 0.919 |
| PF3D7_1457200 | -8.62   | 0.228  | 0.918 | 9.05   | 0.204  | 0.919 |
| PF3D7_0317700 | -2.07   | 0.366  | 0.918 | 8      | 0.0606 | 0.919 |
| PF3D7_0100700 | -3.51   | 0.584  | 0.918 | 2      | 0.733  | 0.957 |
| PF3D7_0203200 | 4.27    | 0.332  | 0.918 | -3.14  | 0.496  | 0.922 |
| PF3D7_1215000 | 1.4     | 0.653  | 0.92  | 1.6    | 0.758  | 0.962 |
| PF3D7_1405300 | -0.244  | 0.678  | 0.923 | 0.434  | 0.698  | 0.954 |
| PF3D7_1013100 | -0.863  | 0.507  | 0.918 | 2.72   | 0.106  | 0.919 |
| PF3D7_1443300 | -4.45   | 0.473  | 0.918 | 3.21   | 0.663  | 0.952 |
| PF3D7_1103700 | -2.56   | 0.175  | 0.918 | 5.33   | 0.0856 | 0.919 |
| PF3D7_0415900 | 10.7    | 0.0824 | 0.918 | -9.15  | 0.0874 | 0.919 |
| PF3D7_1000500 | 1.22    | 0.402  | 0.918 | -1.13  | 0.557  | 0.927 |
| PF3D7_0319500 | -1.24   | 0.602  | 0.918 | 0.761  | 0.863  | 0.98  |
| PF3D7_0317600 | -6.4    | 0.16   | 0.918 | 9.56   | 0.0746 | 0.919 |
| PF3D7_1469000 | -5.62   | 0.26   | 0.918 | 0.102  | 0.982  | 0.998 |
| PF3D7_0407300 | -4.23   | 0.204  | 0.918 | 1.39   | 0.629  | 0.946 |
| PF3D7_1459500 | -4.96   | 0.22   | 0.918 | 0.195  | 0.944  | 0.994 |
| PF3D7_1465900 | 5.95    | 0.288  | 0.918 | -3.93  | 0.345  | 0.919 |

|               |        |        |       |         |        |       |
|---------------|--------|--------|-------|---------|--------|-------|
| PF3D7_0414800 | -2.62  | 0.564  | 0.918 | -0.983  | 0.837  | 0.973 |
| PF3D7_1430200 | -9.75  | 0.0587 | 0.918 | 4.44    | 0.351  | 0.919 |
| PF3D7_0817700 | 2.47   | 0.476  | 0.918 | -1.6    | 0.623  | 0.942 |
| PF3D7_1474000 | 0.938  | 0.294  | 0.918 | -0.791  | 0.419  | 0.919 |
| PF3D7_0411800 | -0.135 | 0.92   | 0.985 | 0.174   | 0.956  | 0.994 |
| PF3D7_1109400 | -1.87  | 0.62   | 0.919 | 0.419   | 0.927  | 0.989 |
| PF3D7_0604900 | -1.57  | 0.545  | 0.918 | 1.14    | 0.678  | 0.954 |
| PF3D7_0411200 | 0.397  | 0.892  | 0.98  | -0.0102 | 0.997  | 1     |
| PF3D7_0730400 | -0.197 | 0.959  | 0.992 | 0.541   | 0.881  | 0.981 |
| PF3D7_1360900 | -16.1  | 0.183  | 0.918 | 29.1    | 0.0721 | 0.919 |
| PF3D7_1328200 | 1.18   | 0.417  | 0.918 | -1.34   | 0.378  | 0.919 |
| PF3D7_1436700 | 1.29   | 0.816  | 0.953 | -1.28   | 0.818  | 0.968 |
| PF3D7_1224800 | 0.827  | 0.591  | 0.918 | -3.34   | 0.178  | 0.919 |
| PF3D7_1035800 | -0.563 | 0.733  | 0.937 | 1.14    | 0.485  | 0.92  |
| PF3D7_1336700 | -1.22  | 0.772  | 0.943 | -3.68   | 0.459  | 0.919 |
| PF3D7_1134900 | -1.04  | 0.702  | 0.931 | 0.464   | 0.87   | 0.981 |
| PF3D7_1214800 | -0.61  | 0.896  | 0.98  | 0.442   | 0.917  | 0.987 |
| PF3D7_0916800 | 2.67   | 0.275  | 0.918 | -0.74   | 0.719  | 0.957 |
| PF3D7_0802500 | 11.9   | 0.0827 | 0.918 | -8.84   | 0.0875 | 0.919 |
| PF3D7_1471400 | 0.159  | 0.933  | 0.987 | 3.89    | 0.217  | 0.919 |

**levels on probability of sterile protection against CHMI, adjusted by dose of PfSPZ-CVac**
